# Supplementary material for: Cytosolic aspartate aminotransferase moonlights as a ribosome-binding modulator of Gcn2 activity during oxidative stress
Source: eLife journal article supplement (doi:10.7554/elife.73466), 2022-05-27

# SOURCE DATA

Figure 5a – western blot images

Anti-Sui2/eIF2 $\alpha$

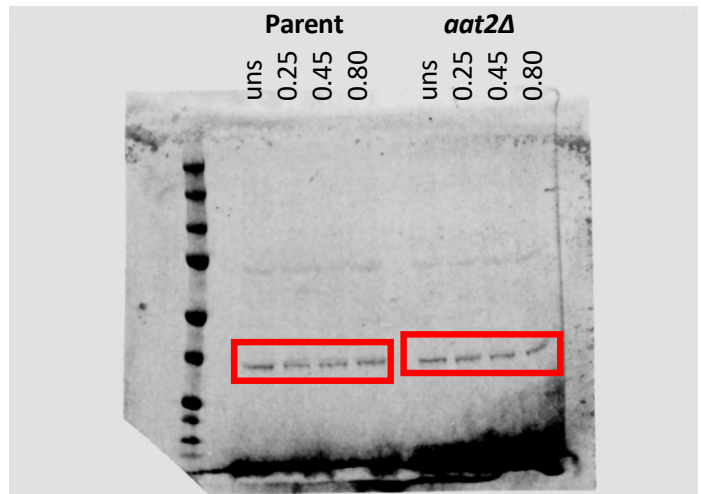

Anti-phospho-Sui2/eIF2 $\alpha$

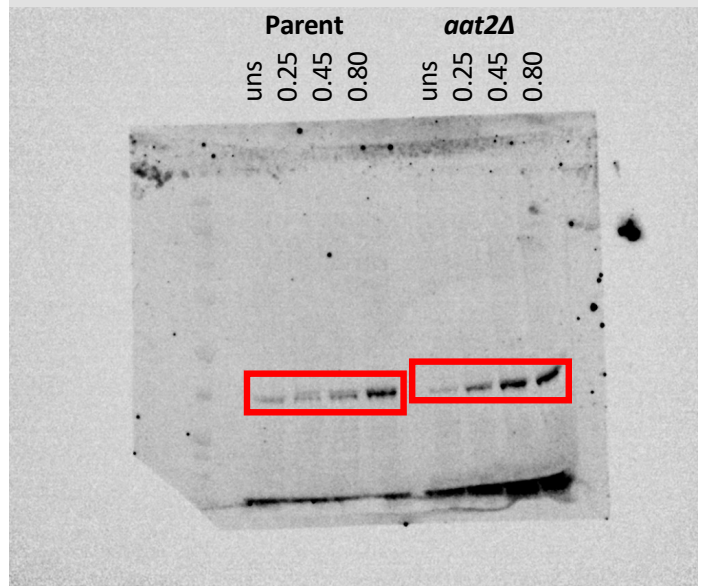

Anti-Pab1

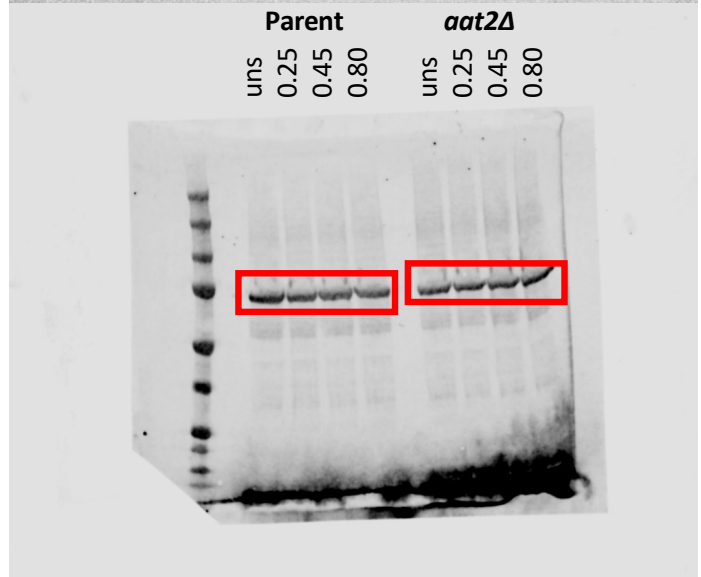

# SOURCE DATA

Figure 6a – western blot images

Anti-Pab1

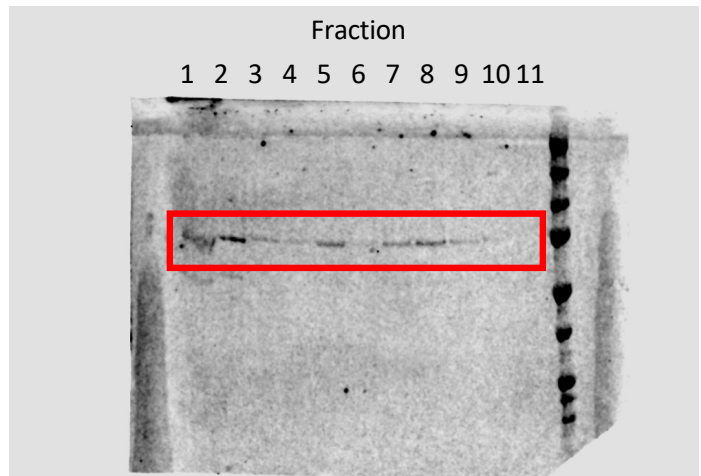

Anti-Scp160

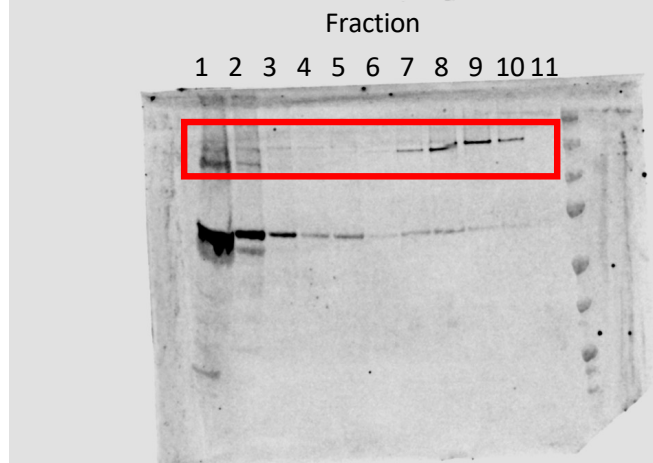

Anti-protein A (Aat2-TAP)

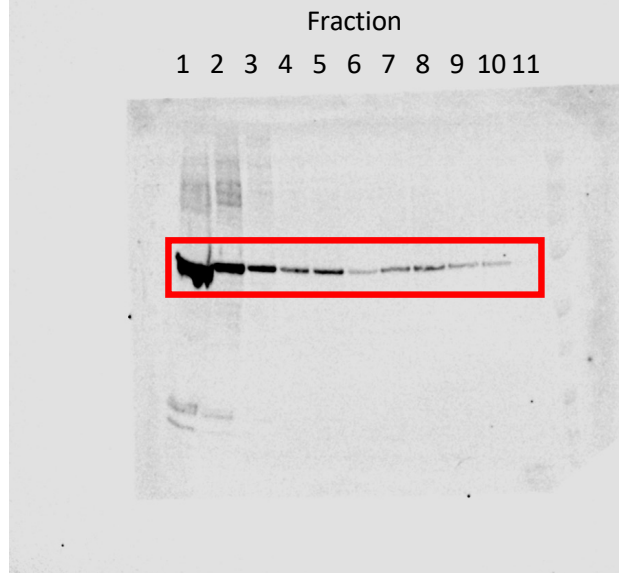

## SOURCE DATA

Figure 6b (left panels, untreated) – western blot images

Anti-Pab1

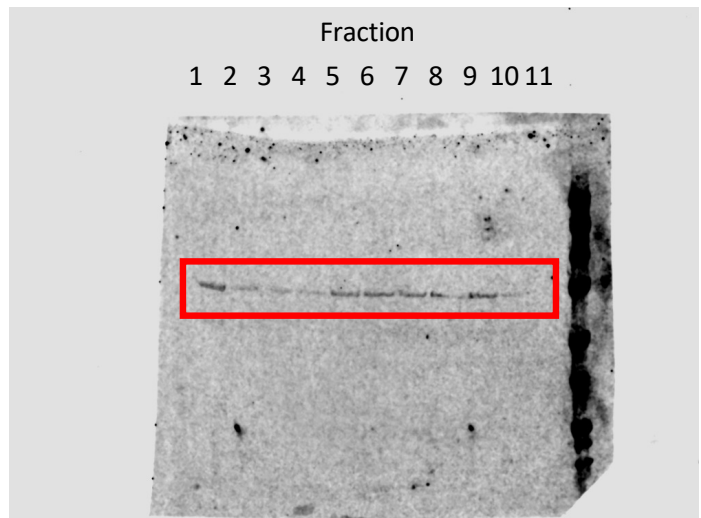

Anti-Scp160

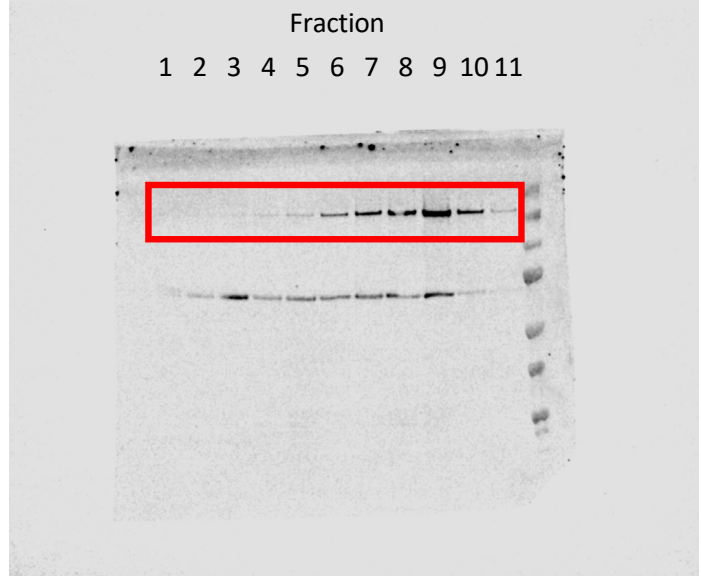

Anti-protein A (Aat2-TAP)

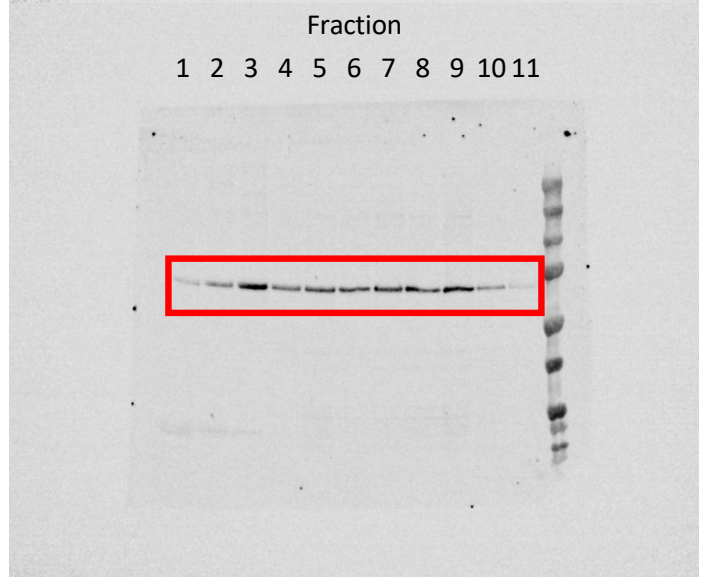

## SOURCE DATA

Figure 6b (right panels, +RNase) – western blot images

Anti-Pab1

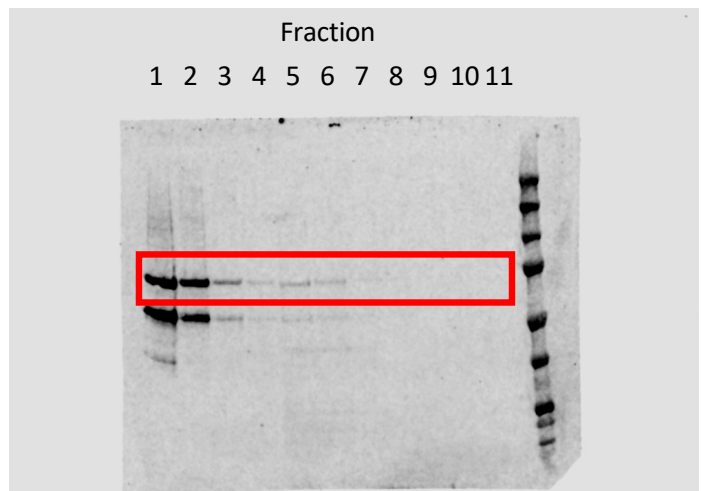

Anti-Scp160

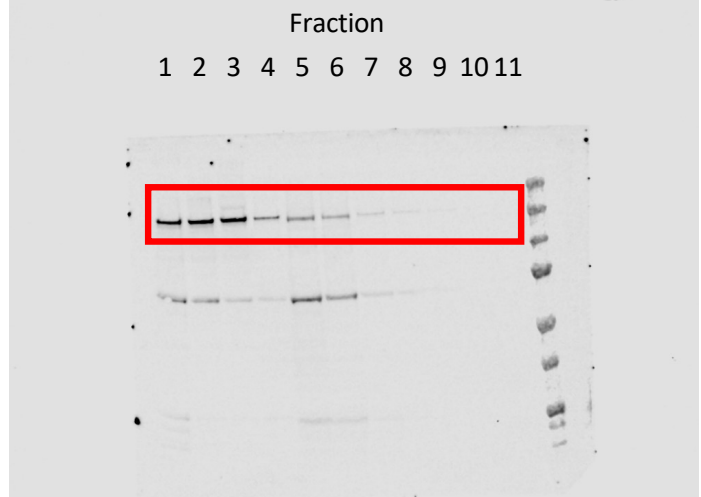

Anti-protein A (Aat2-TAP)

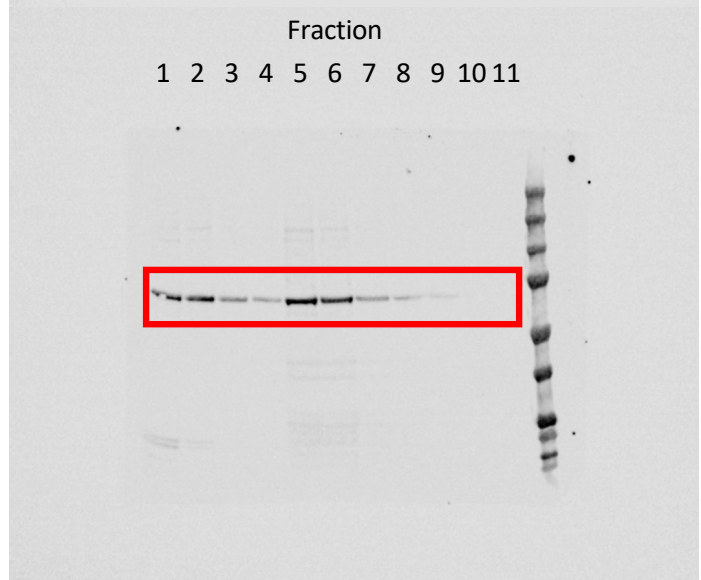

# SOURCE DATA

Figure 6c – western blot images

Anti-Pab1

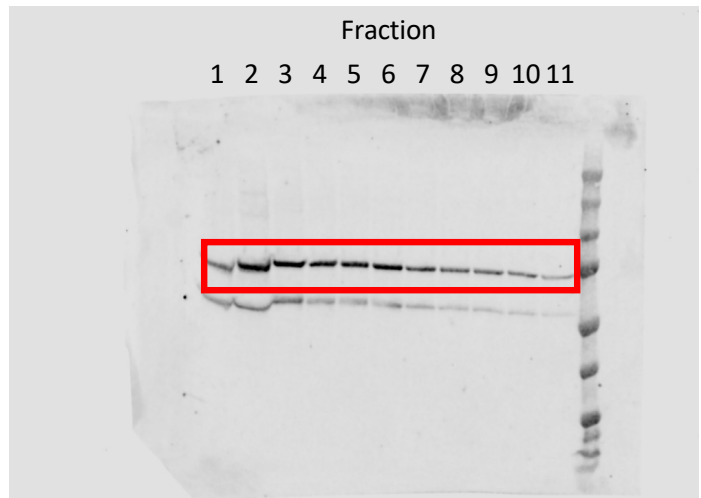

Anti-Scp160

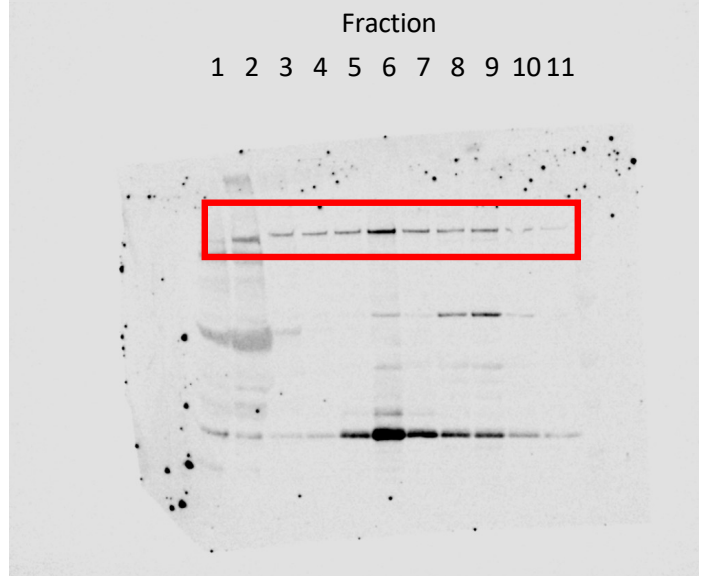

Anti-protein A (Aat2-TAP)

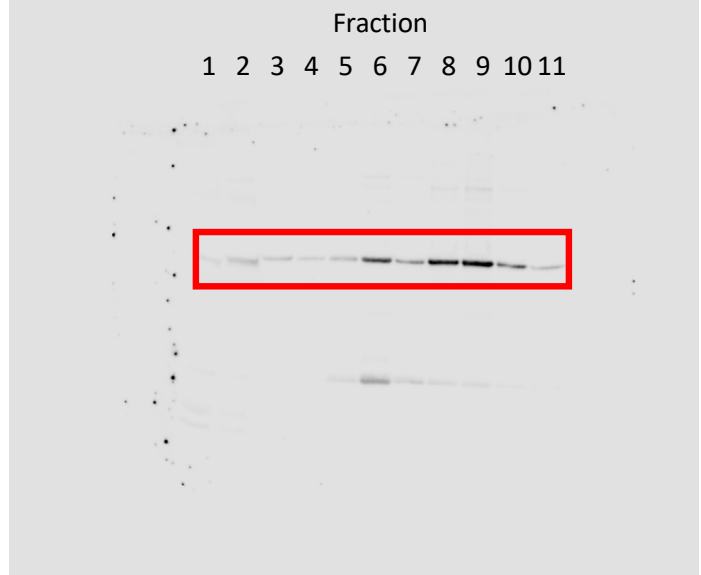

## SOURCE DATA

Figure 6c – western blot images

Anti-Rpl35

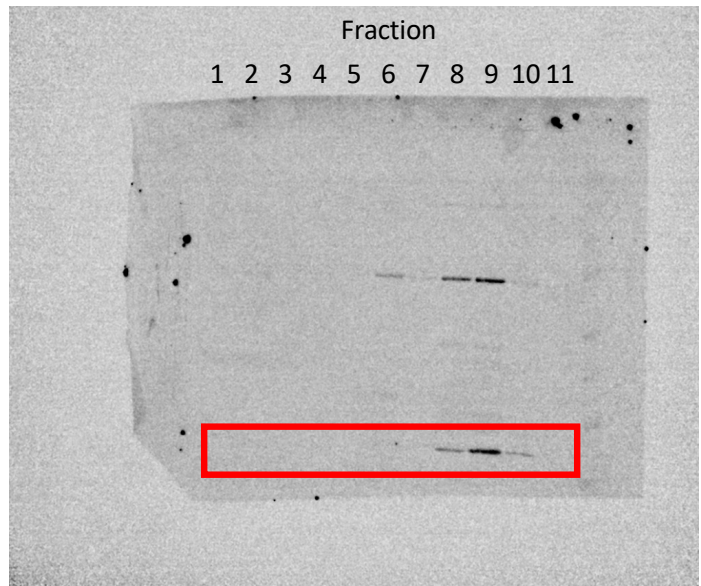

Anti-Rps3

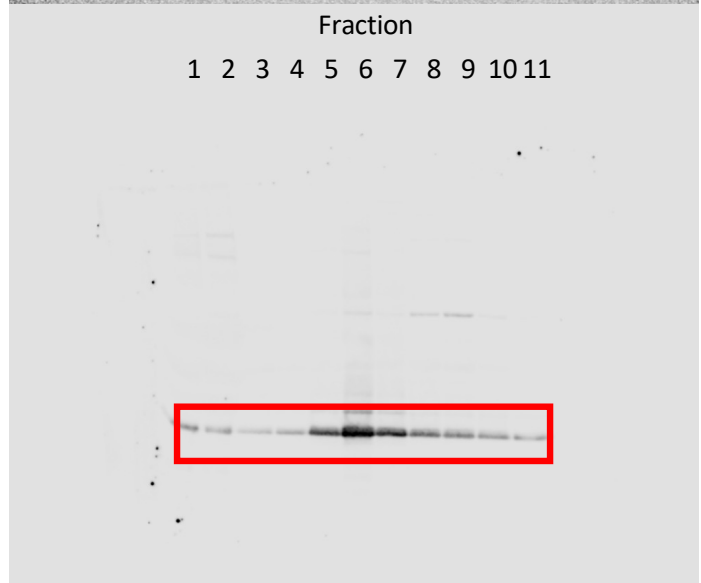

## SOURCE DATA

Figure 7b (left panels, unstressed, SM) – western blot images

Anti-Pab1

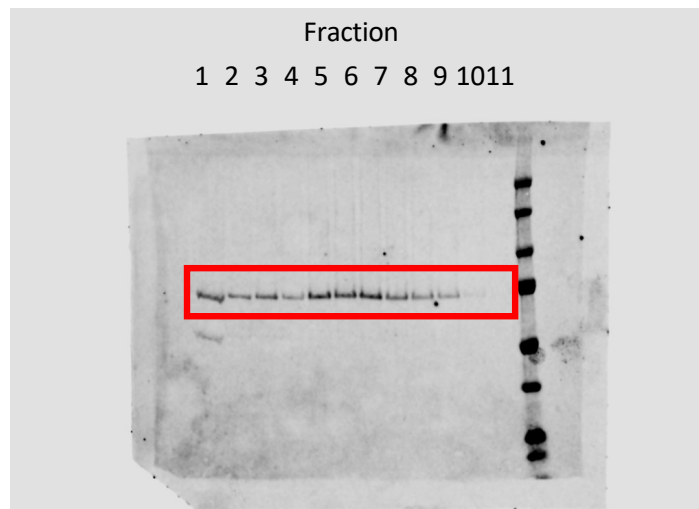

Anti-protein A (Aat2-TAP)

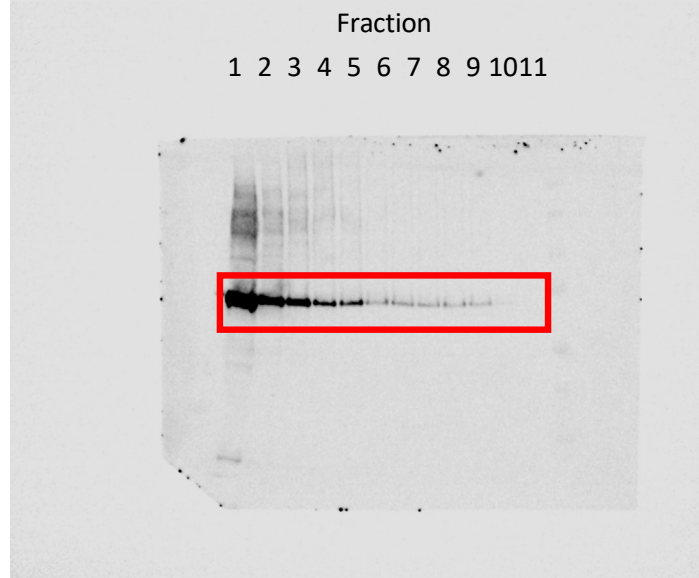

## SOURCE DATA

Figure 7b (left panels, unstressed, K255E) – western blot image

Anti-Pab1

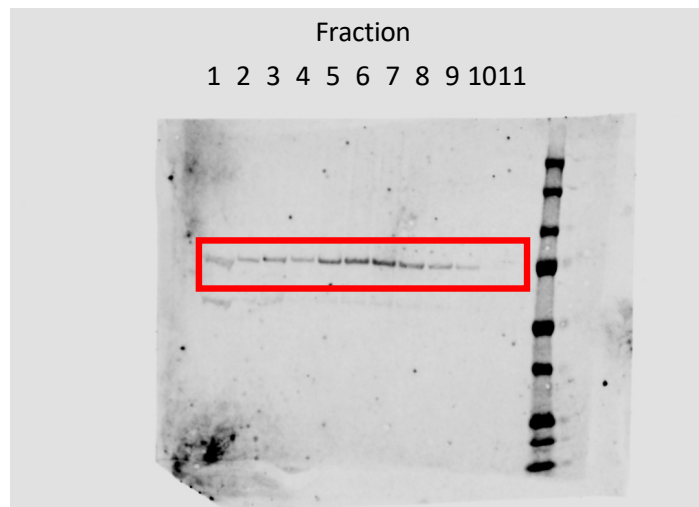

Anti-protein A (Aat2-TAP)

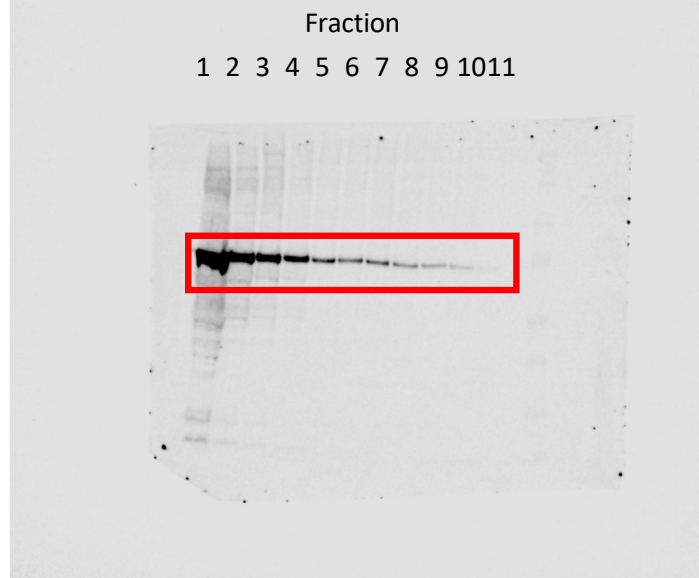



## SOURCE DATA

Figure 7b (left panels, unstressed, R387E) – western blot image

Anti-Pab1

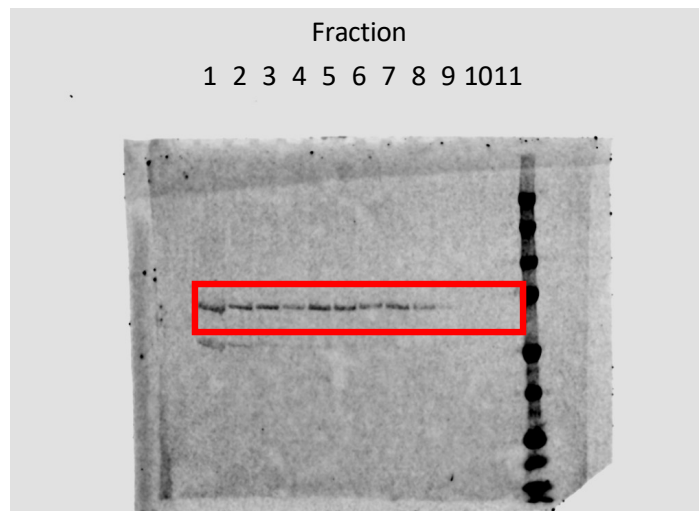

Anti-protein A (Aat2-TAP)

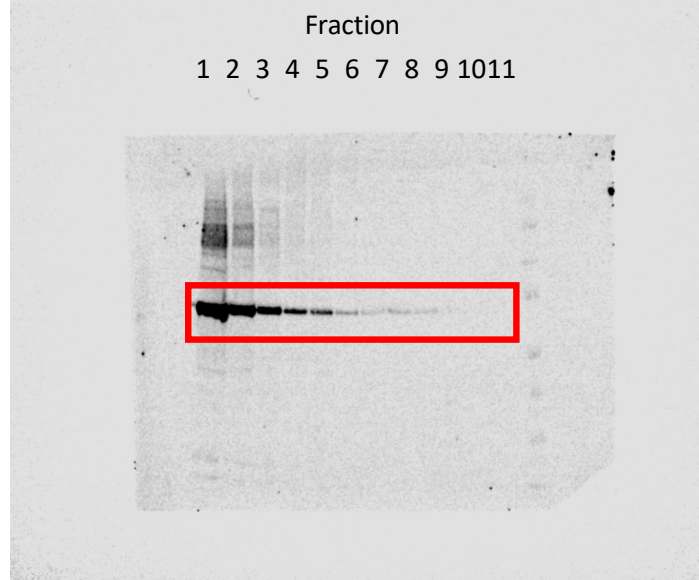

## SOURCE DATA

Figure 7b (right panels, +H<sub>2</sub>O<sub>2</sub>, SM) – western blot images

Anti-Pab1

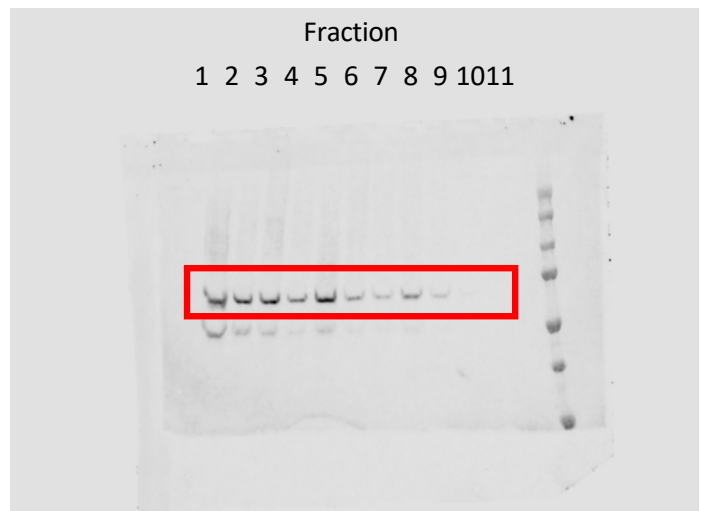

Anti-protein A (Aat2-TAP)

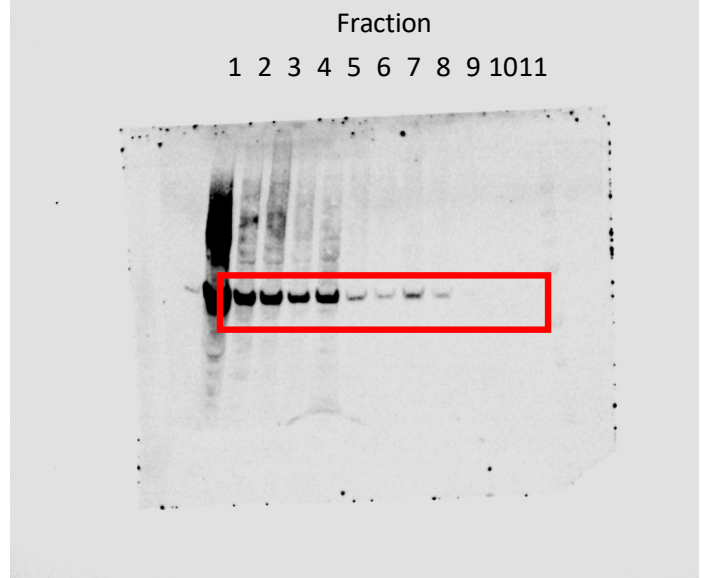

## SOURCE DATA

Figure 7b (right panels, +H<sub>2</sub>O<sub>2</sub>, K255E) – western blot images

Anti-Pab1

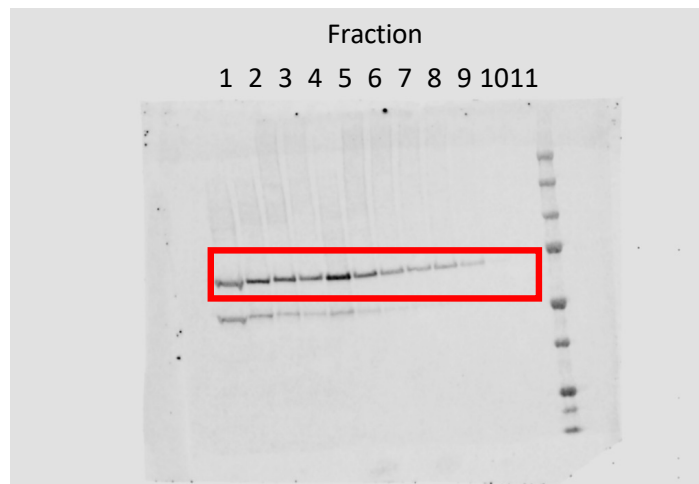

Anti-protein A (Aat2-TAP)

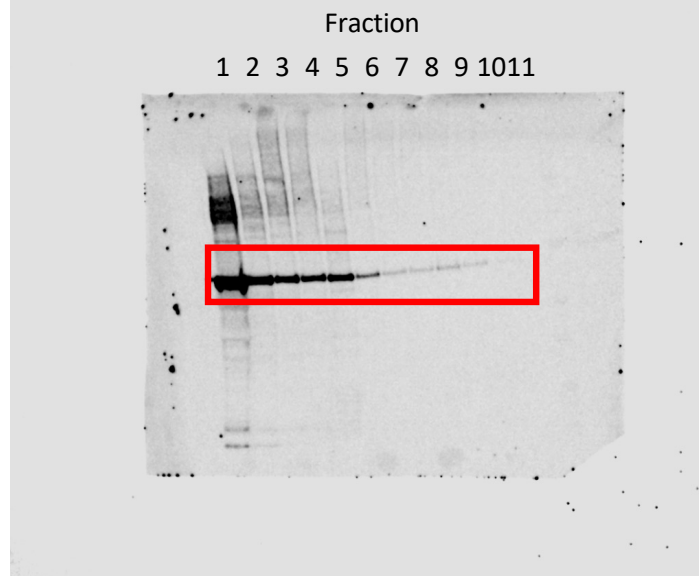

## SOURCE DATA

Figure 7b (right panels, +H<sub>2</sub>O<sub>2</sub>, R387E) – western blot images

Anti-Pab1

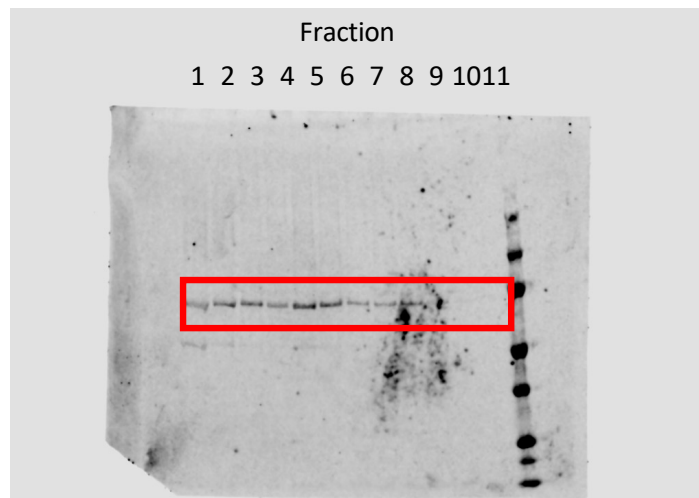

Anti-protein A (Aat2-TAP)

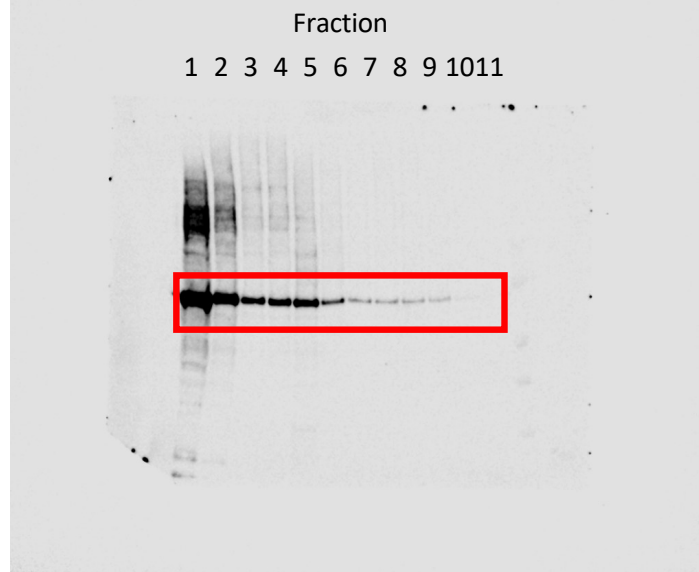

## SOURCE DATA

Figure 7d – western blot images

Three (parent, *aat2Δ*) or four (K255E, R387E) replicates were performed and loaded on to separate gels. Each set of samples is an independent replicate, except for the Parent samples on gels 1 and 3, which are the same.

The Parent +0.45 mM H<sub>2</sub>O<sub>2</sub> sample from gel 1 was loaded on each gel so that bands could be normalised to a common sample (lane N on all gels).

Representative samples shown in figures highlighted in red, all others in orange.

# SOURCE DATA

Figure 7d – western blot images (gel 1)

## Anti-Sui2/eIF2 $\alpha$

N = normaliser. Same sample (Parent +0.45 mM H<sub>2</sub>O<sub>2</sub>) loaded on each gel for normalisation

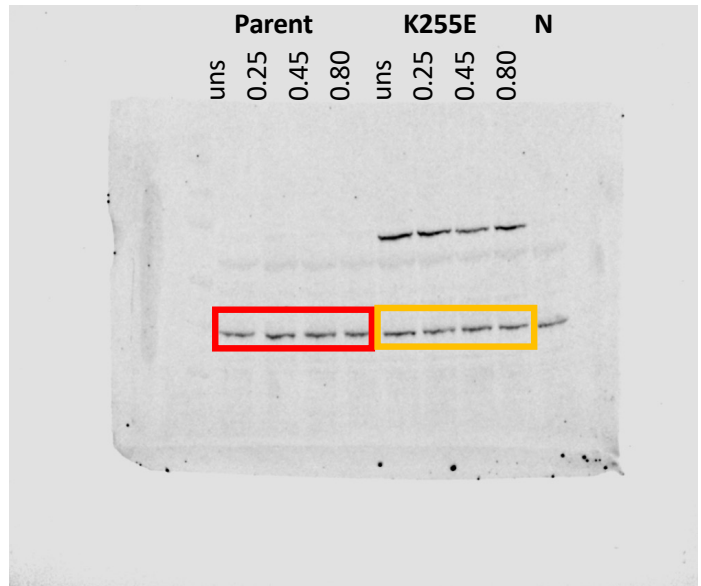

## Anti-phospho-Sui2/eIF2 $\alpha$

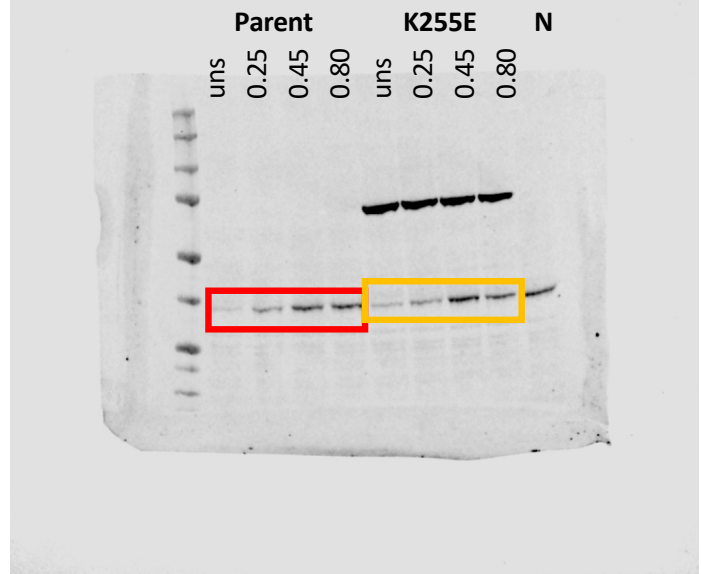

## Anti-Pab1

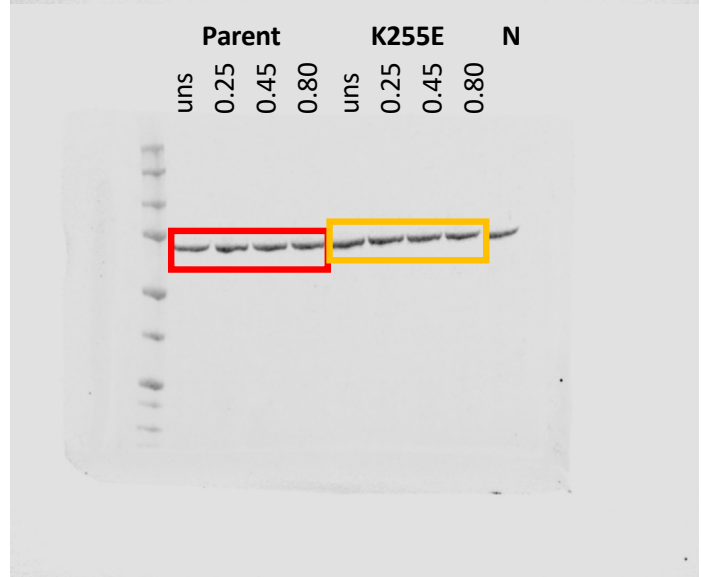

## SOURCE DATA

Figure 7d – western blot images (gel 2)

### Anti-Sui2/eIF2 $\alpha$

N = normaliser. Same sample (Parent +0.45 mM H<sub>2</sub>O<sub>2</sub>) loaded on each gel for normalisation

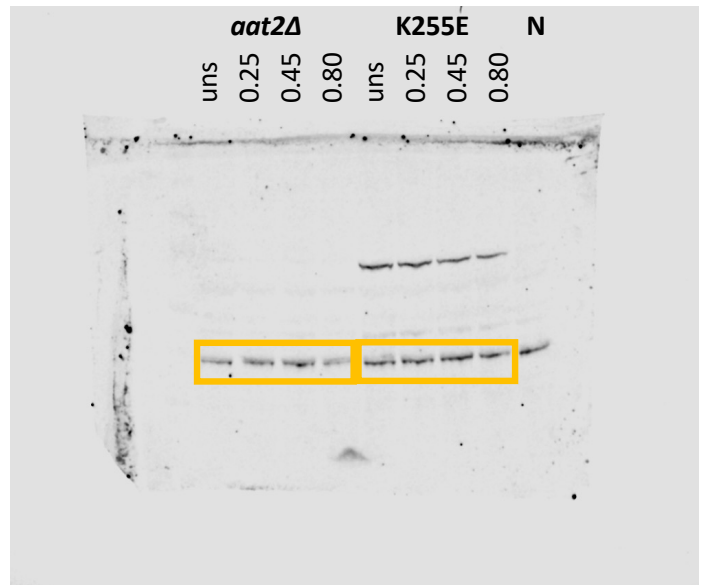

### Anti-phospho-Sui2/eIF2 $\alpha$

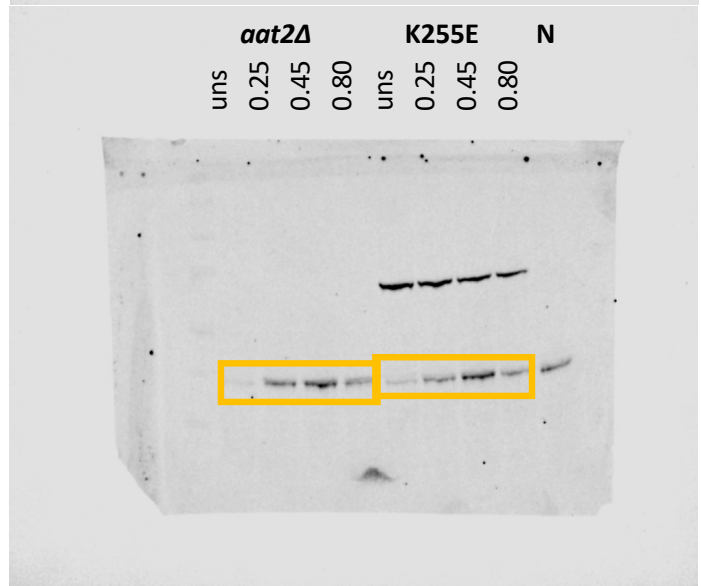

### Anti-Pab1

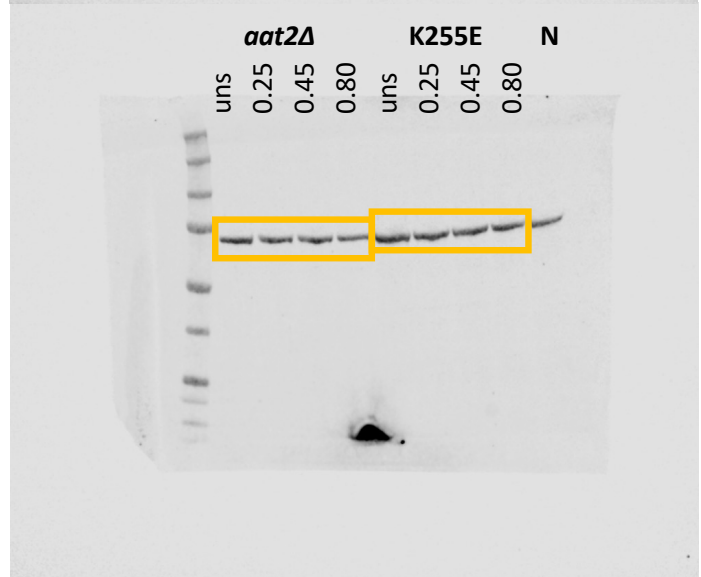

# SOURCE DATA

Figure 7d – western blot images (gel 3)

## Anti-Sui2/eIF2 $\alpha$

N = normaliser. Same sample (Parent +0.45 mM H<sub>2</sub>O<sub>2</sub>) loaded on each gel for normalisation

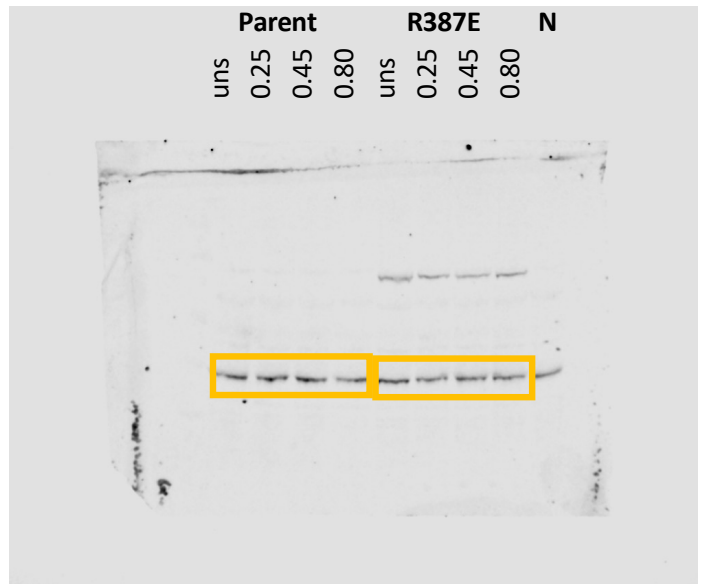

## Anti-phospho-Sui2/eIF2 $\alpha$

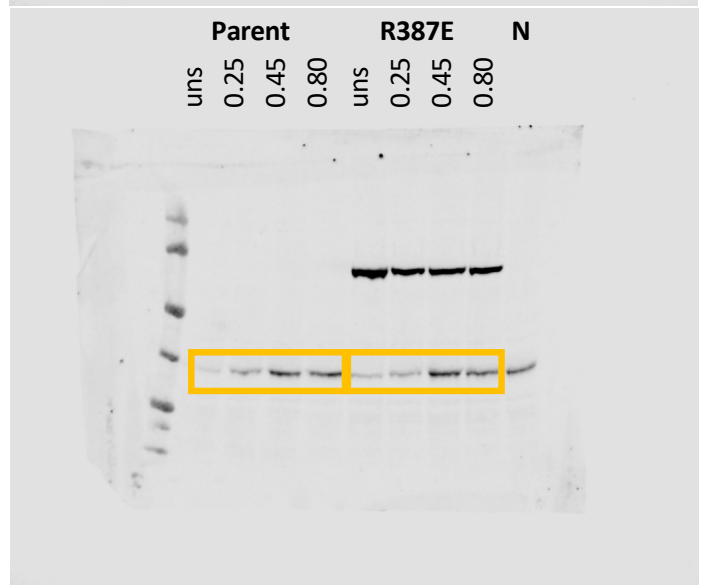

## Anti-Pab1

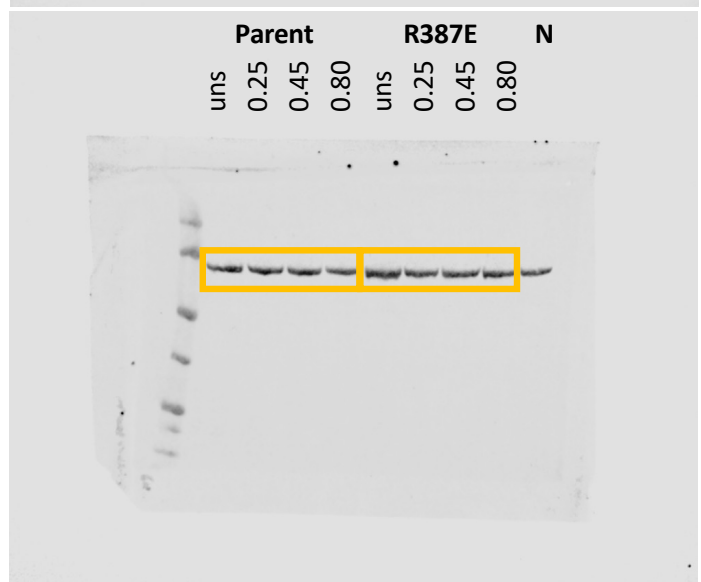



## SOURCE DATA

Figure 7d – western blot images (gel 4)

### Anti-Sui2/eIF2 $\alpha$

N = normaliser. Same sample (Parent +0.45 mM H<sub>2</sub>O<sub>2</sub>) loaded on each gel for normalisation

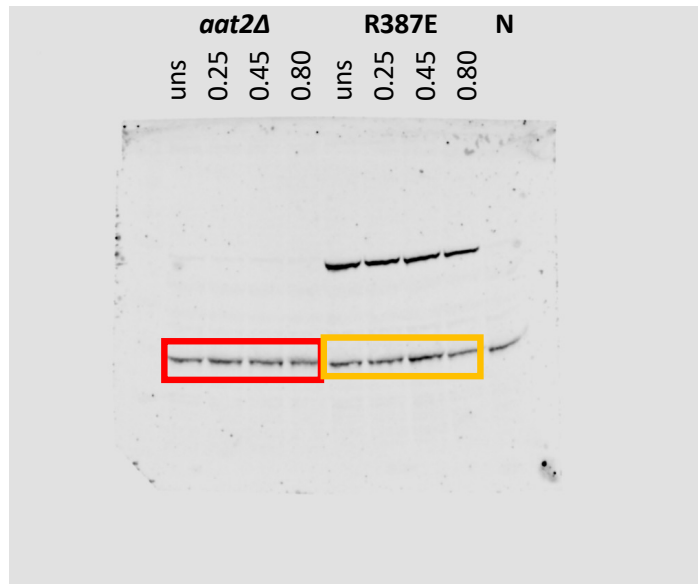

### Anti-phospho-Sui2/eIF2 $\alpha$

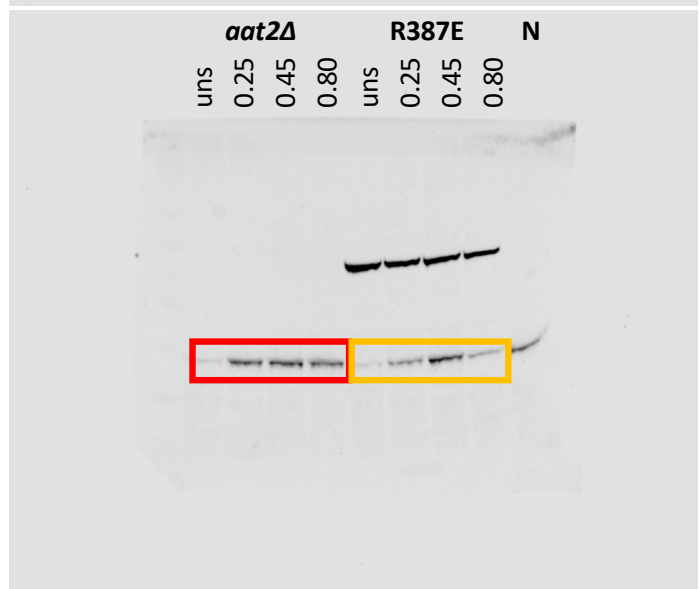

### Anti-Pab1

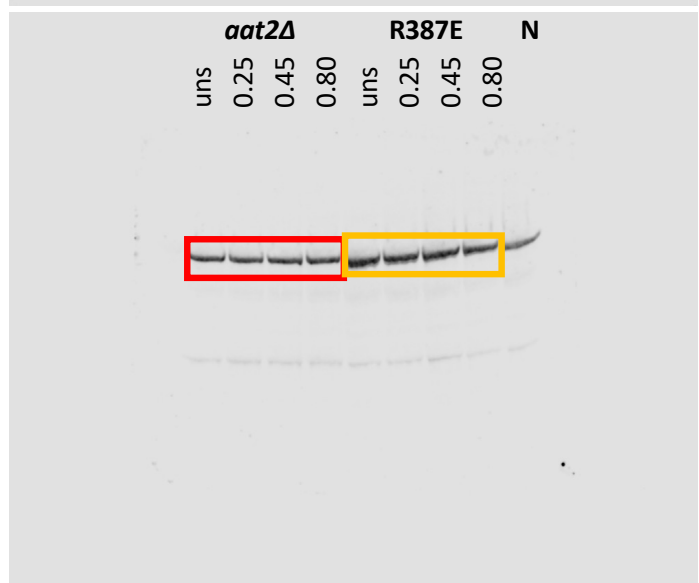

## SOURCE DATA

Figure 7d – western blot images (gel 5)

### Anti-Sui2/eIF2 $\alpha$

N = normaliser. Same sample (Parent +0.45 mM H<sub>2</sub>O<sub>2</sub>) loaded on each gel for normalisation

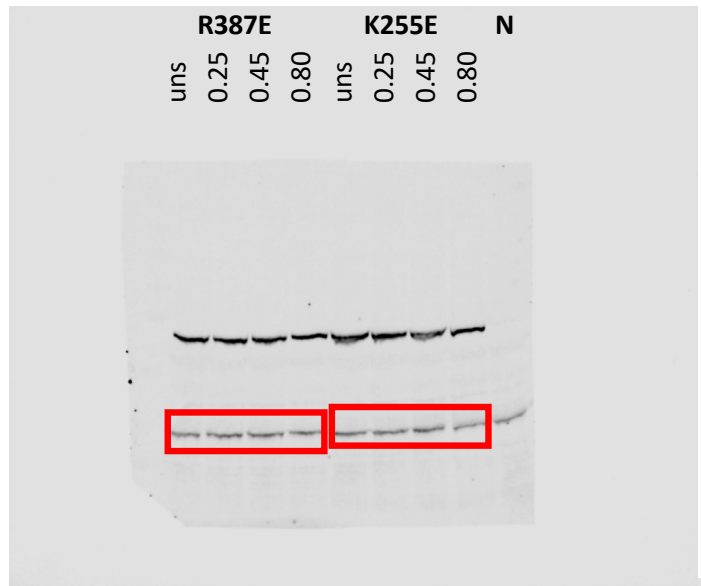

### Anti-phospho-Sui2/eIF2 $\alpha$

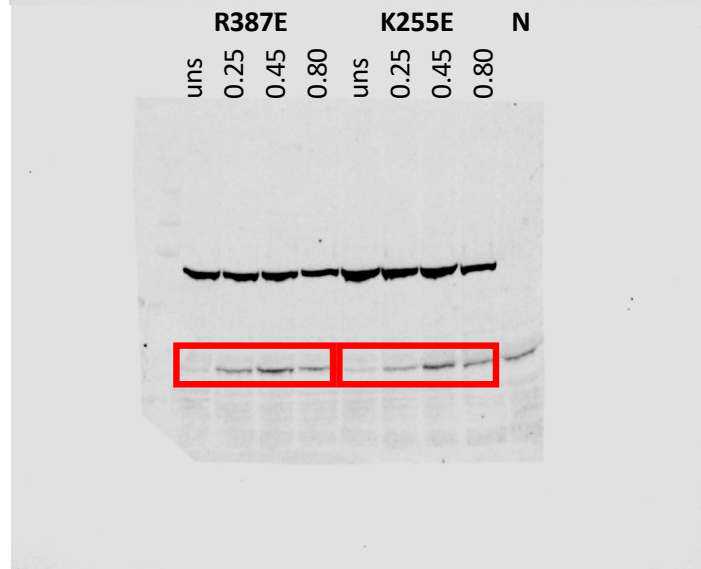

### Anti-Pab1

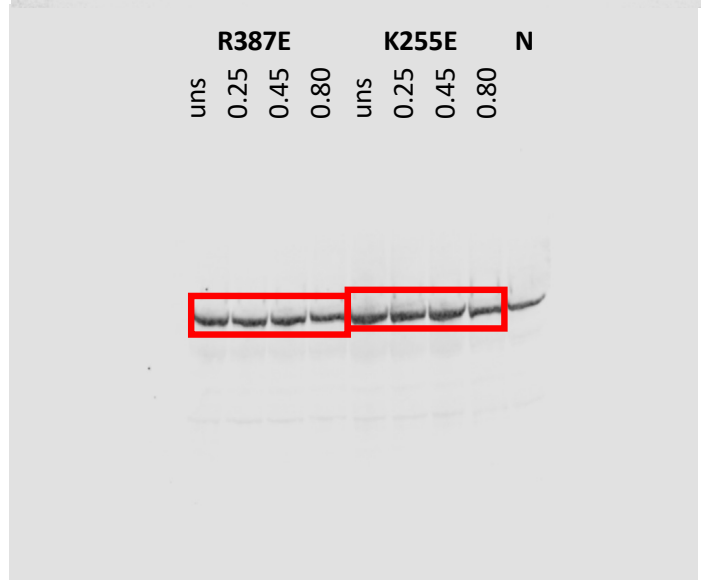

## SOURCE DATA

Figure 7d – western blot images (gel 6)

### Anti-Sui2/eIF2 $\alpha$

N = normaliser. Same sample (Parent +0.45 mM H<sub>2</sub>O<sub>2</sub>) loaded on each gel for normalisation

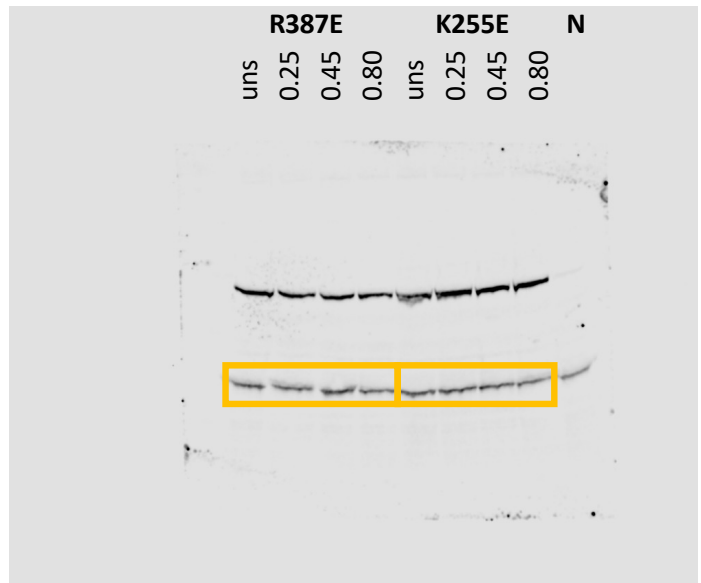

### Anti-phospho-Sui2/eIF2 $\alpha$

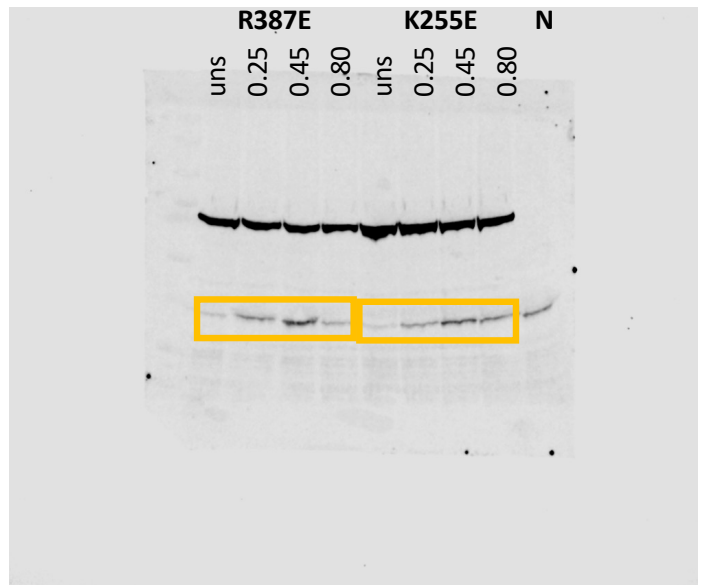

### Anti-Pab1

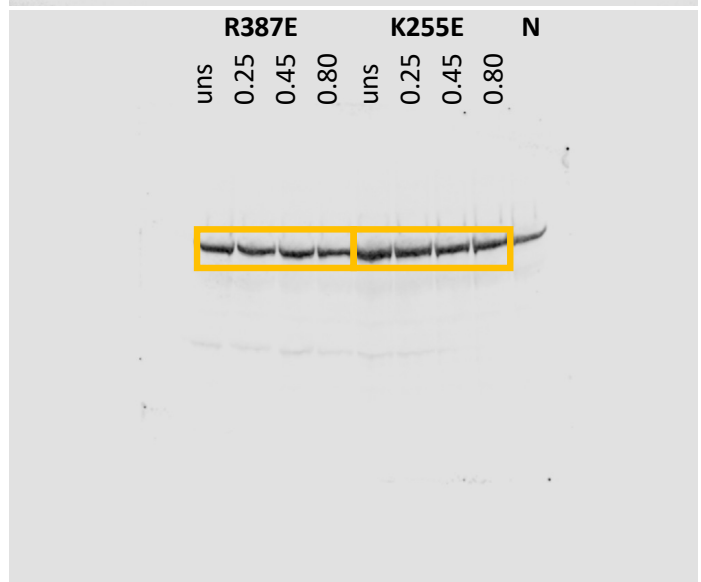

## SOURCE DATA

Figure 7d – western blot images (gel 7)

### Anti-Sui2/eIF2 $\alpha$

N2 = normaliser. Parent +0.80 mM H<sub>2</sub>O<sub>2</sub> loaded here and on gel 8 for normalisation

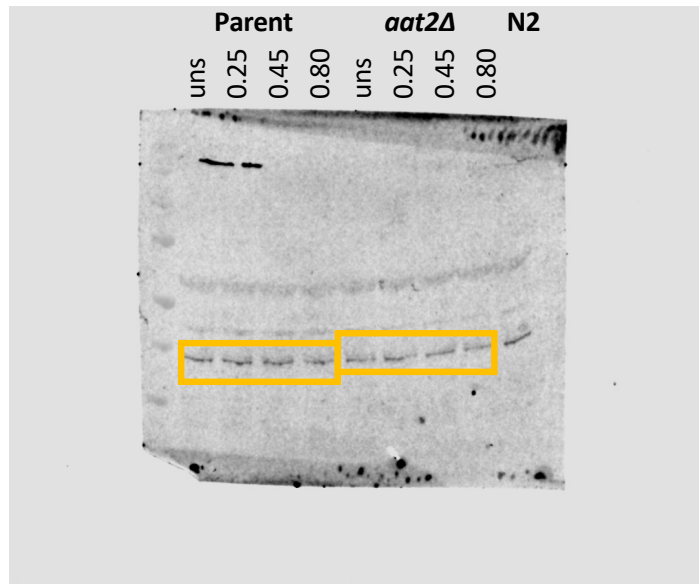

### Anti-phospho-Sui2/eIF2 $\alpha$

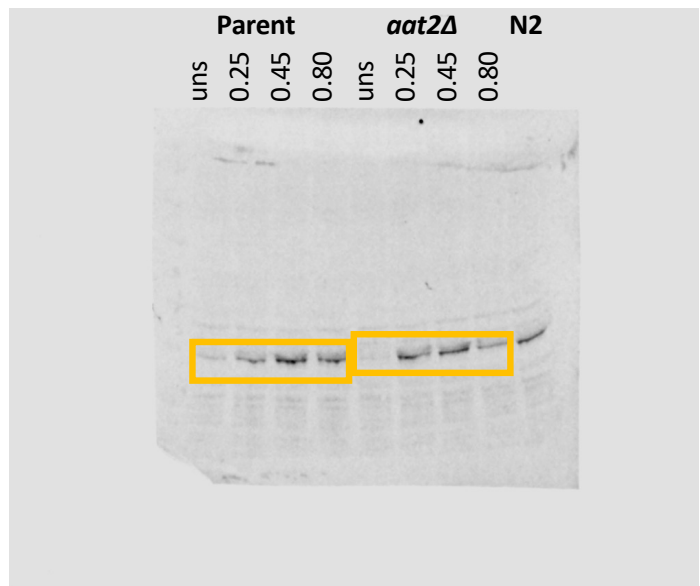

## SOURCE DATA

Figure 7d – western blot images (gel 8)

### Anti-Sui2/eIF2 $\alpha$

N (Parent +0.45 mM H<sub>2</sub>O<sub>2</sub>)  
and N2 (Parent +0.80 mM  
H<sub>2</sub>O<sub>2</sub>) = normalisers

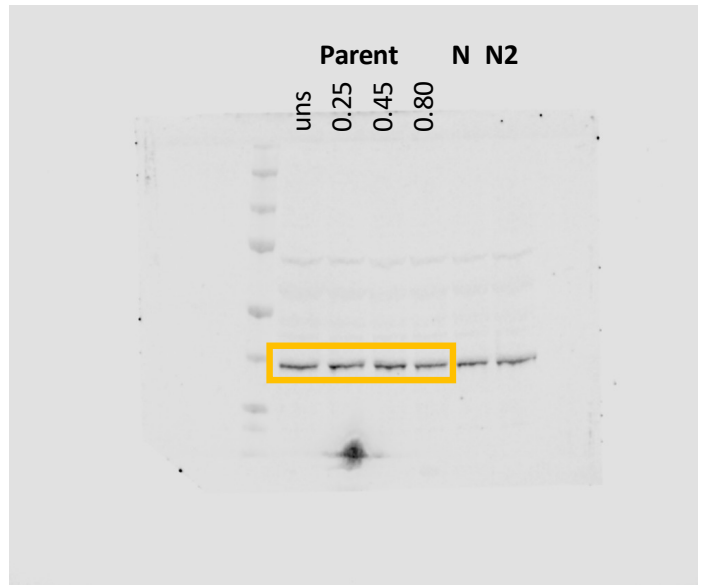

### Anti-phospho-Sui2/eIF2 $\alpha$

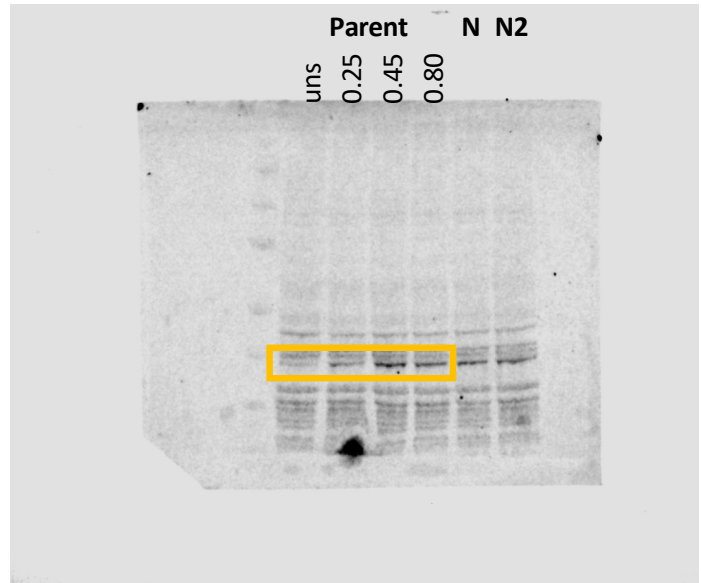

Supplement: supp [file elife-73466-supp-v1.zip]
