# Supplementary material for: Cytosolic aspartate aminotransferase moonlights as a ribosome-binding modulator of Gcn2 activity during oxidative stress
Source: eLife. 2022 May 27;11:e73466. doi: 10.7554/eLife.73466 (PMC9191892; doi:10.7554/eLife.73466)
Supplement: Supplementary file 1. [file elife-73466-supp1.xlsx]

## Sheet: Header
Sheet 1: Background list
List of proteins identified in one or more samples (fractions or totals). Used as background for GO analysis.
Function	RP (ribosomal protein), TF (translation factor), RBP (RNA-binding protein) or NA
Sheet 2: Proteins by fraction
Proteins that were reproducibly identified in one or more samples (fractions or totals), i.e. those found in two or more replicates for at least one sample.
F1,F2,F3,F4,F5,T	LFQ intensity values for individual fractions (F1-F5) and totals (T), normalised to the mean LFQ intensity across unstressed F1-F5 for each protein
Set	F1-F4 (identified in all of F1-F4 for all three conditions), F1-F5 (identified in all of F1-F5 for all three conditions) or NA
Sheet 3: Polysomal MS data
Normalised polysome association profiles and estimated percentage ribosome association for proteins identified in F1-F4 for all conditions. Note that F5 values are shown where present, but were not used for clustering.
Cluster	Cluster from hierarchical clustering, ordered as far as possible from most polysome-enriched (1) to most polysome-depleted (14)
F1,F2,F3,F4,F5,T	LFQ intensity values for individual fractions (F1-F5) and totals (T), normalised to the mean LFQ intensity across unstressed F1-F5 for each protein
FS/T	Fraction sum-to-total ratio. Fraction sum is the sum of the LFQ intensity values for F1-F5 (note that this was calculated before normalisation). FS/T = Fraction sum / Total
%R	Estimated percentage ribosome association (% of protein present in F1-F5). Loading for the 'Total' samples was 1/30th that for the fractions combined: %R = ((FS/T) / 30) *100
ΔFS/T	Change in FS/T during stress: (FS/Tstress) / (FS/Tuns)
ΔFS/T p-value
Sheet 4: Polysomal MS data
Top hits from polysomal MS data. Candidates were defined from the proteins in Sheet 3 according to three criteria:
(1) Ribosome association in Unstressed conditions. Candidates with estimated %R > 5% were considered.
(2) Change in ribosome association in either stress condition (ΔFS/T). Candidates showing a significant ΔFS/T (p < 0.05) in one or both stress conditions were considered.
(3) Known function. Ribosomal proteins (RPs) and Translation Factors (TFs) were excluded from the list of candidates.
The 74 candidates defined by these criteria were then ordered and assigned a rank.
Proteins showing significant changes in both stress conditions were ranked above those changing in only one condition, then proteins were ranked based on their % ribosome association.
Sheet 5: Enriched GO terms
GO analysis was performed using clusterProfiler (Yu et al, 2012). Significantly enriched terms (-log10(adjusted p-value) ≥2) in the set of proteins present in F1-F4 under all conditions are shown.
Note that RPs and TFs were removed from both the set for analysis and the background set, in order to identify other enriched functions.
Ontology	Type of GO term: BP - biological process, MF - molecular function. No cellular component (CC) terms were significantly enriched.
Count	Number of genes in the test set associated with a given term
Gene ratio	Proportion of the test set associated with a given term
Background ratio	Proportion of the background set associated with a given term
Gene names	The full list of genes associated with a given term
Sheet 6: Yeast strains used in this study
Sheet 7: Plasmids used in this study
Sheet 8: Oligonucleotides used in this study

## Sheet: Sheet 1 - Background list
Identifier	Uniprot	Name	Function
YNL141W	P53909	AAH1	NA
YHR047C	P37898	AAP1	RBP
YLR027C	P23542	AAT2	RBP
YCR088W	P15891	ABP1	RBP
YOR239W	Q08641	ABP140	RBP
YGR037C	P31787	ACB1	NA
YNR016C;YMR207C	Q00955;P32874	ACC1;HFA1	RBP
YLR304C	P19414	ACO1	RBP
YJL200C	P39533	ACO2	NA
YLR153C;YAL054C	P52910;Q01574	ACS2;ACS1	RBP
YFL039C	P60010	ACT1	RBP
YAR015W	P27616	ADE1	NA
YNL220W	P80210	ADE12	RBP
YLR359W	Q05911	ADE13	RBP
YLR028C	P54113	ADE16	RBP
YMR120C	P38009	ADE17	RBP
YOR128C	P21264	ADE2	RBP
YGR204W	P07245	ADE3	RBP
YMR300C	P04046	ADE4	RBP
YGL234W	P07244	ADE5,7	RBP
YGR061C	P38972	ADE6	RBP
YOL086C;YMR303C;YBR145W	P00330;P00331;P38113	ADH1;ADH2;ADH5	RBP
YMR083W	P07246	ADH3	RBP
YGL256W	P10127	ADH4	NA
YMR318C	Q04894	ADH6	RBP
YDR226W	P07170	ADK1	RBP
YJR105W	P47143	ADO1	RBP
YDR214W	Q12449	AHA1	RBP
YLR109W	P38013	AHP1	RBP
YER080W	P40053	AIM9	RBP
YMR092C	P46680	AIP1	RBP
YDR264C	P39010	AKR1	NA
YOR335C	P40825	ALA1	RBP
YJL122W	P47019	ALB1	NA
YOR374W	P46367	ALD4	RBP
YER073W	P40047	ALD5	RBP
YPL061W	P54115	ALD6	RBP
YML035C	P15274	AMD1	RBP
YCL050C	P16550	APA1	RBP
YKL103C	P14904	APE1	NA
YKL157W	P32454	APE2	RBP
YBR286W	P37302	APE3	RBP
YKL114C	P22936	APN1	NA
YML022W	P49435	APT1	RBP
YBR149W	P38115	ARA1	NA
YER036C	P40024	ARB1	RBP
YGL105W	P46672	ARC1	RBP
YLR370C	Q05933	ARC18	RBP
YKL013C	P33204	ARC19	RBP
YNR035C	P53731	ARC35	RBP
YBR234C	P38328	ARC40	RBP
YHR013C	P07347	ARD1	NA
YDL192W	P11076	ARF1	RBP
YDL137W	P19146	ARF2	RBP
YOL058W	P22768	ARG1	NA
YJL088W	P05150	ARG3	NA
YHR018C	P04076	ARG4	NA
YER069W	Q01217	ARG5,6	NA
YMR062C	Q04728	ARG7	NA
YGL157W	P53111	ARI1	RBP
YBR164C	P38116	ARL1	RBP
YDR127W	P08566	ARO1	RBP
YGL148W	P28777	ARO2	RBP
YDR035W	P14843	ARO3	RBP
YBR249C	P32449	ARO4	RBP
YPR060C	P32178	ARO7	NA
YGL202W	P53090	ARO8	RBP
YDL029W	P32381	ARP2	RBP
YJR065C	P47117	ARP3	RBP
YDR101C	Q03862	ARX1	RBP
YMR116C	P38011	ASC1	RP
YJL115W	P32447	ASF1	NA
YPR145W	P49089	ASN1	RBP
YGR124W	P49090	ASN2	RBP
YDR321W	P38986	ASP1	NA
YBL099W	P07251	ATP1	RBP
YJR121W	P00830	ATP2	RBP
YHR208W	P38891	BAT1	RBP
YJR148W	P47176	BAT2	RBP
YJL020C	P47068	BBC1	NA
YDR361C	Q06338	BCP1	NA
YIL033C	P07278	BCY1	RBP
YAL060W	P39714	BDH1	NA
YOR198C	P38934	BFR1	RBP
YER177W	P29311	BMH1	RBP
YDR099W	P34730	BMH2	RBP
YJR025C	P47096	BNA1	NA
YLR231C	Q05979	BNA5	NA
YFR047C	P43619	BNA6	NA
YDR428C	Q04066	BNA7	NA
YNR051C	P53741	BRE5	RBP
YOL077C	Q08235	BRX1	RBP
YIL083C	P40506	CAB2	NA
YFL028C	P43569	CAF16	NA
YOR276W	P12962	CAF20	RBP
YPL048W	P29547	CAM1	TF
YKL007W	P28495	CAP1	RBP
YIL034C	P13517	CAP2	NA
YPL111W	P00812	CAR1	RBP
YLR438W	P07991	CAR2	RBP
YLR175W	P33322	CBF5	RBP
YKR066C	P00431	CCP1	NA
YAL021C	P31384	CCR4	RBP
YMR038C	P40202	CCS1	RBP
YIL142W	P39076	CCT2	RBP
YJL014W	P39077	CCT3	RBP
YDL143W	P39078	CCT4	RBP
YJR064W	P40413	CCT5	RBP
YDR188W	P39079	CCT6	NA
YJL111W	P42943	CCT7	RBP
YJL008C	P47079	CCT8	RBP
YDR182W	P40986	CDC1	NA
YHR107C	P32468	CDC12	RBP
YAL038W	P00549	CDC19	RBP
YLR314C	P32457	CDC3	RBP
YOL139C	P07260	CDC33	TF
YDR168W	P06101	CDC37	RBP
YCR093W	P25655	CDC39	RBP
YDL126C	P25694	CDC48	RBP
YPL160W	P26637	CDC60	RBP
YGL206C	P22137	CHC1	RBP
YLR330W	Q12114	CHS5	RBP
YHR052W	P38779	CIC1	RBP
YNR001C	P00890	CIT1	NA
YMR012W	Q03690	CLU1	RBP
YLL050C	Q03048	COF1	RBP
YDL145C	P53622	COP1	RBP
YBL045C	P07256	COR1	NA
YKL179C	P34237	COY1	NA
YOR303W	P07258	CPA1	RBP
YJR109C	P03965	CPA2	RBP
YDR155C	P14832	CPR1	RBP
YML078W	P25719	CPR3	NA
YDR304C	P35176	CPR5	NA
YLR216C	P53691	CPR6	RBP
YJL172W	P27614	CPS1	NA
YGR218W	P30822	CRM1	RBP
YLR429W	Q06440	CRN1	NA
YGL238W	P33307	CSE1	NA
YOL007C	Q08054	CSI2	NA
YGL027C	P53008	CWH41	NA
YAL012W	P31373	CYS3	RBP
YGR155W	P32582	CYS4	RBP
YML070W	P54838	DAK1	RBP
YNL112W	P24783	DBP2	RBP
YGL078C	P20447	DBP3	RBP
YOR046C	P20449	DBP5	RBP
YLR270W	Q06151	DCS1	NA
YMR173W	P18899	DDR48	RBP
YOR204W;YPL119C	P06634;P24784	DED1;DBP1	TF
YHR019C	P38707	DED81	RBP
YDL160C	P39517	DHH1	RBP
YPL266W	P41819	DIM1	RBP
YOL021C	Q08162	DIS3	RBP
YEL071W	P39976	DLD3	RBP
YER166W	P32660	DNF1	NA
YKL213C	P36037	DOA1	NA
YHR044C;YHR043C	P38774;P38773	DOG1;DOG2	NA
YNL001W	P33309	DOM34	NA
YLR172C	P32469	DPH5	NA
YPR183W	P14020	DPM1	RBP
YLL018C	P04802	DPS1	RBP
YFR044C	P43616	DUG1	RBP
YBR252W	P33317	DUT1	NA
YHR068W	P38791	DYS1	NA
YHR132C	P38836	ECM14	NA
YHL030W	P38737	ECM29	NA
YER176W	P32644	ECM32	RBP
YBR078W	P38248	ECM33	RBP
YAL003W	P32471	EFB1	TF
YDR385W	P32324	EFT2	TF
YPL037C	Q02642	EGD1	RBP
YHR193C	P38879	EGD2	RBP
YBR177C	P38295	EHT1	NA
YGR200C	P42935	ELP2	NA
YPL086C	Q02908	ELP3	RBP
YLR186W	Q06287	EMG1	RBP
YDR516C	Q04409	EMI2	RBP
YFL048C	P43555	EMP47	NA
YLR083C	P32802	EMP70	NA
YNL313C	P42842	EMW1	RBP
YGR254W	P00924	ENO1	RBP
YHR174W	P00925	ENO2	RBP
YBR247C	P38333	ENP1	RBP
YMR049C	Q04660	ERB1	RBP
YPL028W	P41338	ERG10	RBP
YMR208W	P07277	ERG12	NA
YML126C	P54839	ERG13	RBP
YJL167W	P08524	ERG20	RBP
YML008C	P25087	ERG6	RBP
YMR220W	P24521	ERG8	NA
YAR002C-A	Q05359	ERP1	RBP
YML067C	Q04651	ERV41	NA
YAL042W	P39727	ERV46	NA
YBR026C	P38071	ETR1	NA
YLR300W	P23776	EXG1	RBP
YOR317W	P30624	FAA1	RBP
YMR246W	P47912	FAA4	RBP
YKL182W	P07149	FAS1	RBP
YPL231W	P19097	FAS2	RBP
YKL060C	P14540	FBA1	RBP
YPR062W	Q12178	FCY1	NA
YLR342W;YGR032W	P38631;P40989	FKS1;GSC2	RBP
YNL168C	P53889	FMP41	RBP
YGR267C	P51601	FOL2	RBP
YNL135C	P20081	FPR1	RBP
YDR519W	P32472	FPR2	NA
YML074C	P38911	FPR3	RBP
YEL047C	P32614	FRD1	RBP
YLR060W	P15624	FRS1	RBP
YFL022C	P15625	FRS2	RBP
YHR049W	P38777	FSH1	RBP
YPL262W	P08417	FUM1	RBP
YAL035W	P39730	FUN12	TF
YHR128W	P18562	FUR1	RBP
YMR250W	Q04792	GAD1	NA
YMR307W	P22146	GAS1	RBP
YCL011C	P25555	GBP2	RBP
YER025W	P32481	GCD11	TF
YDR211W	P32501	GCD6	TF
YGL195W	P33892	GCN1	RBP
YFR009W	P43535	GCN20	RBP
YDL226C	P35197	GCS1	NA
YDR019C	P48015	GCV1	NA
YMR189W	P49095	GCV2	NA
YAL044C	P39726	GCV3	NA
YEL042W	P32621	GDA1	NA
YOR375C;YAL062W	P07262;P39708	GDH1;GDH3	RBP
YER136W	P39958	GDI1	RBP
YDL100C	Q12154	GET3	RBP
YKL104C	P14742	GFA1	RBP
YHR108W	P38817	GGA2	RBP
YER133W	P32598	GLC7	RBP
YCL040W	P17709	GLK1	RBP
YPR035W	P32288	GLN1	RBP
YOR168W	P13188	GLN4	RBP
YPL091W	P41921	GLR1	RBP
YDL171C	Q12680	GLT1	RBP
YEL046C	P37303	GLY1	RBP
YHR183W;YGR256W	P38720;P53319	GND1;GND2	RBP
YNL274C	P53839	GOR1	NA
YHL031C	P38736	GOS1	NA
YDL022W	Q00055	GPD1	RBP
YOL059W	P41911	GPD2	RBP
YPR160W	P06738	GPH1	RBP
YKL152C	P00950	GPM1	RBP
YIL053W	P41277	GPP1	RBP
YER062C	P40106	GPP2	RBP
YBR244W	P38143	GPX2	NA
YOL151W	Q12068	GRE2	RBP
YHR104W	P38715	GRE3	RBP
YBR121C;YPR081C	P38088;Q06817	GRS1;GRS2	RBP
YOL049W	Q08220	GSH2	NA
YLR293C	P32835	GSP1	RBP
YMR217W	P38625	GUA1	RBP
YDR454C	P15454	GUK1	RBP
YGL245W	P46655	GUS1	RBP
YIL041W	P40531	GVP36	RBP
YJR069C	P47119	HAM1	RBP
YMR290C	Q03532	HAS1	RBP
YKR084C	P32769	HBS1	RBP
YNL281W	P53834	HCH1	NA
YLR192C	Q05775	HCR1	RBP
YNL014W	P53978	HEF3	TF
YBL032W	P38199	HEK2	RBP
YDR266C	Q05580	HEL2	RBP
YDR232W	P09950	HEM1	NA
YDR044W	P11353	HEM13	RBP
YGL040C	P05373	HEM2	NA
YDL205C	P28789	HEM3	NA
YBR009C	P02309	HHF1	RBP
YER055C	P00498	HIS1	RBP
YCL030C	P00815	HIS4	RBP
YIL116W	P07172	HIS5	NA
YBR248C	P33734	HIS7	RBP
YER057C	P40037	HMF1	RBP
YDR174W	Q03973	HMO1	RBP
YBR034C	P38074	HMT1	NA
YDL125C	Q04344	HNT1	RBP
YJR075W	P47124	HOC1	NA
YLR113W	P32485	HOG1	NA
YDR158W	P13663	HOM2	RBP
YER052C	P10869	HOM3	NA
YJR139C	P31116	HOM6	RBP
YDR399W	Q04178	HPT1	RBP
YLR301W	Q05905	HRI1	RBP
YMR186W	P15108	HSC82	RBP
YOR020C	P38910	HSP10	NA
YLL026W	P31539	HSP104	RBP
YFL014W	P22943	HSP12	RBP
YLR259C	P19882	HSP60	RBP
YPL240C	P02829	HSP82	RBP
YBL002W;YDR224C	P02294;P02293	HTB2;HTB1	NA
YPR033C	P07263	HTS1	RBP
YFR053C	P04806	HXK1	RBP
YGL253W	P04807	HXK2	RBP
YDR345C	P32466	HXT3	RBP
YEL034W;YJR047C	P23301;P19211	HYP2;ANB1	TF
YIR037W	P40581	HYR1	RBP
YNL037C	P28834	IDH1	RBP
YOR136W	P28241	IDH2	RBP
YPL117C	P15496	IDI1	NA
YDL066W	P21954	IDP1	RBP
YLR384C	Q06706	IKI3	RBP
YBL076C	P09436	ILS1	RBP
YER086W	P00927	ILV1	RBP
YMR108W	P07342	ILV2	RBP
YJR016C	P39522	ILV3	RBP
YLR355C	P06168	ILV5	RBP
YCL009C	P25605	ILV6	RBP
YHR216W;YAR073W	P38697;P39567	IMD2;IMD1	RBP
YLR432W;YAR075W	P50095;O42831	IMD3;YAR075W	RBP
YML056C	P50094	IMD4	RBP
YOR109W	Q12271	INP53	NA
YHR085W	P38803	IPI1	NA
YNL182C	P53877	IPI3	NA
YBR011C	P00817	IPP1	RBP
YIR036C	P40580	IRC24	NA
YBR017C	P38217	KAP104	RBP
YER110C	P40069	KAP123	RBP
YLR347C	Q06142	KAP95	RBP
YJL034W	P16474	KAR2	RBP
YPL263C	Q08979	KEL3	NA
YPL145C	P35844	KES1	RBP
YIL125W	P20967	KGD1	RBP
YDR148C	P19262	KGD2	NA
YDR483W	P27809	KRE2	NA
YNL132W	P53914	KRE33	RBP
YPR159W;YGR143W	P32486;P33336	KRE6;SKN1	NA
YDR037W	P15180	KRS1	RBP
YOR099W	P27810	KTR1	RBP
YBR205W	P38130	KTR3	NA
YNL045W	Q10740	LAP2	NA
YNL239W	Q01532	LAP3	RBP
YNL071W	P12695	LAT1	RBP
YGL009C	P07264	LEU1	RBP
YNL104C	P06208	LEU4	RBP
YOR108W	Q12166	LEU9	RBP
YDL051W	P33399	LHP1	RBP
YJR070C	P47120	LIA1	RBP
YFL018C	P09624	LPD1	RBP
YOR142W	P53598	LSC1	RBP
YGL099W	P53145	LSG1	RBP
YJL124C	P47017	LSM1	RBP
YHR121W	P38828	LSM12	RBP
YBL026W	P38203	LSM2	RBP
YER112W	P40070	LSM4	RBP
YER146W	P40089	LSM5	RBP
YGR169C-A	Q3E772	LSO2	RBP
YPL004C	Q12230	LSP1	RBP
YIL094C	P40495	LYS12	RBP
YBR115C	P07702	LYS2	NA
YDL131W	Q12122	LYS21	RBP
YDR234W	P49367	LYS4	NA
YNR050C	P38999	LYS9	NA
YKL029C	P36013	MAE1	RBP
YLR244C	Q01662	MAP1	RBP
YBL091C	P38174	MAP2	RBP
YOR298C-A	O14467	MBF1	RBP
YNL307C	P21965	MCK1	RBP
YKL085W	P17505	MDH1	RBP
YOL126C	P22133	MDH2	NA
YDL078C	P32419	MDH3	RBP
YOL076W	Q12387	MDM20	RBP
YLR106C	Q12019	MDN1	RBP
YGR264C	P00958	MES1	RBP
YGL125W	P53128	MET13	NA
YOL064C	P32179	MET22	NA
YER091C	P05694	MET6	RBP
YOR241W	Q08645	MET7	NA
YLR017W	Q07938	MEU1	RBP
YPL169C	Q99257	MEX67	RBP
YJR144W	P32787	MGM101	RBP
YBR084W	P09440	MIS1	RBP
YNL085W	P40850	MKT1	RBP
YIL051C	P40185	MMF1	RBP
YER001W	P39106	MNN1	NA
YJL183W	P46985	MNN11	RBP
YBR015C	P38069	MNN2	NA
YJL186W	P46982	MNN5	NA
YPL050C	P39107	MNN9	RBP
YPR118W	Q06489	MRI1	RBP
YPL184C	Q08925	MRN1	RBP
YOR370C	P32864	MRS6	RBP
YKL009W	P33201	MRT4	RBP
YJL123C	P47018	MTC1	RBP
YKR080W	Q02046	MTD1	RBP
YJL050W	P47047	MTR4	RBP
YNR043W	P32377	MVD1	RBP
YOR326W;YAL029C	P19524;P32492	MYO2;MYO4	RBP
YMR109W	Q04439	MYO5	RBP
YPL126W	Q02931	NAN1	RBP
YKR048C	P25293	NAP1	RBP
YDL040C	P12945	NAT1	RBP
YOR253W	Q08689	NAT5	NA
YBL024W	P38205	NCL1	RBP
YHR042W	P16603	NCP1	RBP
YPL226W	Q08972	NEW1	RBP
YCL017C	P25374	NFS1	NA
YPR052C	P11632	NHP6a	RBP
YGL221C	P53081	NIF3	NA
YMR309C	P32497	NIP1	TF
YPL211W	Q08962	NIP7	RBP
YLR351C	P49954	NIT3	NA
YNL123W	P53920	NMA111	NA
YHR170W	P38861	NMD3	RBP
YLR195C	P14743	NMT1	NA
YLR285W	Q05874	NNT1	NA
YPL093W	Q02892	NOG1	RBP
YNR053C	P53742	NOG2	RBP
YDL014W	P15646	NOP1	RBP
YNL061W	P40991	NOP2	RBP
YLR197W	Q12460	NOP56	RBP
YOR310C	Q12499	NOP58	RBP
YDL213C	Q07623	NOP6	RBP
YGR103W	P53261	NOP7	RBP
YJR072C	P47122	NPA3	NA
YDR432W	Q01560	NPL3	RBP
YOR209C	P39683	NPT1	RBP
YGL111W	P53136	NSA1	NA
YER126C	P40078	NSA2	RBP
YGR159C	P27476	NSR1	RBP
YER009W	P33331	NTF2	RBP
YDR001C	P32356	NTH1	NA
YER006W	P40010	NUG1	RBP
YBR025C	P38219	OLA1	RBP
YKL215C	P28273	OXP1	NA
YHR179W;YPL171C	Q03558;P41816	OYE2;OYE3	RBP
YDR071C	Q12447	PAA1	RBP
YER165W	P04147	PAB1	TF
YHR063C	P38787	PAN5	NA
YIL145C	P40459	PAN6	NA
YCR077C	P25644	PAT1	RBP
YGR178C	P53297	PBP1	RBP
YBR233W	P38151	PBP2	RBP
YDL053C	Q07362	PBP4	RBP
YEL058W	P38628	PCM1	RBP
YER178W	P16387	PDA1	RBP
YBR221C	P32473	PDB1	RBP
YLR044C;YLR134W	P06169;P16467	PDC1;PDC5	RBP
YCL043C	P17967	PDI1	RBP
YGR193C	P16451	PDX1	NA
YBR035C	P38075	PDX3	RBP
YPL154C	P07267	PEP4	RBP
YGR240C	P16861	PFK1	RBP
YMR205C	P16862	PFK2	RBP
YOR122C	P07274	PFY1	NA
YBR196C	P12709	PGI1	RBP
YCR012W	P00560	PGK1	RBP
YKL127W	P33401	PGM1	RBP
YMR105C	P37012	PGM2	RBP
YDL236W	P19881	PHO13	NA
YBR092C;YHR215W;YAR071W;YBR093C	P24031;P38693;P35842;P00635	PHO3;PHO12;PHO11;PHO5	NA
YBR106W	P38264	PHO88	NA
YGR086C	P53252	PIL1	RBP
YGL008C;YPL036W	P05030;P19657	PMA1;PMA2	RBP
YER003C	P29952	PMI40	RBP
YGL167C	P13586	PMR1	NA
YGL037C	P53184	PNC1	RBP
YOR145C	Q99216	PNO1	RBP
YLR209C	Q05788	PNP1	NA
YML069W	Q04636	POB3	RBP
YBR088C	P15873	POL30	RBP
YNR052C	P39008	POP2	NA
YNL055C	P04840	POR1	RBP
YDL188C	P23595	PPH22	NA
YGR123C	P53043	PPT1	NA
YHR201C	P38698	PPX1	NA
YCL057W	P25375	PRD1	NA
YER012W	P22141	PRE1	RBP
YOR362C	P21242	PRE10	RBP
YPR103W	P30656	PRE2	RBP
YJL001W	P38624	PRE3	NA
YFR050C	P30657	PRE4	NA
YMR314W	P40302	PRE5	RBP
YOL038W	P40303	PRE6	RBP
YBL041W	P23724	PRE7	RBP
YML092C	P23639	PRE8	NA
YGR135W	P23638	PRE9	RBP
YDR300C	P32264	PRO1	NA
YOR323C	P54885	PRO2	RBP
YER023W	P32263	PRO3	RBP
YGL120C	P53131	PRP43	RBP
YKL181W	P32895	PRS1	RBP
YHL011C	P38689	PRS3	RBP
YOL061W	Q12265	PRS5	RBP
YOR361C	P06103	PRT1	TF
YDL055C	P41940	PSA1	RBP
YMR308C	P32337	PSE1	RBP
YML017W	P50109	PSP2	RBP
YDR032C	Q12335	PST2	RBP
YER089C	P39966	PTC2	RBP
YBL056W	P34221	PTC3	RBP
YKL039W	P32857	PTM1	NA
YNL016W	P32588	PUB1	RBP
YDR496C	Q04373	PUF6	RBP
YOR157C	P25043	PUP1	NA
YGR253C	P32379	PUP2	NA
YER094C	P25451	PUP3	RBP
YPL212C	Q12211	PUS1	RBP
YOR243C	Q08647	PUS7	RBP
YLR196W	P21304	PWP1	RBP
YGL062W	P11154	PYC1	RBP
YBR218C	P32327	PYC2	RBP
YPR191W	P07257	QCR2	NA
YHR074W	P38795	QNS1	RBP
YDL103C	P43123	QRI1	RBP
YEL037C	P32628	RAD23	RBP
YGL246C	P53063	RAI1	RBP
YOR048C	Q02792	RAT1	RBP
YAL036C	P39729	RBG1	NA
YGR173W	P53295	RBG2	RBP
YDL135C	Q12434	RDI1	NA
YJL217W	P40893	REE1	NA
YOR207C	P22276	RET1	RBP
YAR007C	P22336	RFA1	RBP
YOL143C	P50861	RIB4	NA
YCR028C-A	P32445	RIM1	RBP
YOR119C	Q12196	RIO1	RBP
YHR197W	P38883	RIX1	NA
YLL034C	Q07844	RIX7	RBP
YOR095C	Q12189	RKI1	NA
YMR247C	Q04781	RKR1	NA
YDR091C	Q03195	RLI1	TF
YLR009W	Q07915	RLP24	RBP
YNL002C	P40693	RLP7	RBP
YMR235C	P11745	RNA1	RBP
YCL028W	P25367	RNQ1	NA
YER070W;YIL066C	P21524;P21672	RNR1;RNR3	RBP
YJL026W	P09938	RNR2	RBP
YGR180C	P49723	RNR4	RBP
YPR010C	P22138	RPA135	RBP
YOR341W	P10964	RPA190	RBP
YOR340C	P46669	RPA43	NA
YNL248C	Q01080	RPA49	NA
YOR151C	P08518	RPB2	RBP
YBR154C	P20434	RPB5	NA
YOR224C	P20436	RPB8	NA
YPR110C	P07703	RPC40	RBP
YHR088W	P38805	RPF1	RBP
YKR081C	P36160	RPF2	RBP
YBR079C	P38249	RPG1	TF
YLR075W	P41805	RPL10	RP
YGR085C;YPR102C	Q3E757;P0C0W9	RPL11b;RPL11a	RP
YEL054C;YDR418W	P0CX54;P0CX53	RPL12a;RPL12b	RP
YMR142C	P40212	RPL13b	RP
YKL006W	P36105	RPL14a	RP
YHL001W	P38754	RPL14b	RP
YLR029C	P05748	RPL15a	RP
YIL133C	P26784	RPL16a	RP
YNL069C	P26785	RPL16b	RP
YKL180W	P05740	RPL17a	RP
YJL177W	P46990	RPL17b	RP
YNL301C;YOL120C	P0CX50;P0CX49	RPL18b;RPL18a	RP
YBR084C-A;YBL027W	P0CX83;P0CX82	RPL19a;RPL19b	RP
YPL220W;YGL135W	P0CX44;P0CX43	RPL1a;RPL1b	RP
YMR242C;YOR312C	P0CX24;P0CX23	RPL20a;RPL20b	RP
YBR191W	Q02753	RPL21a	RP
YPL079W	Q12672	RPL21b	RP
YLR061W	P05749	RPL22a	RP
YFL034C-A	P56628	RPL22b	RP
YER117W;YBL087C	P0CX42;P0CX41	RPL23b;RPL23a	RP
YGL031C	P04449	RPL24a	RP
YGR148C	P24000	RPL24b	RP
YOL127W	P04456	RPL25	RP
YLR344W	P05743	RPL26a	RP
YGR034W	P53221	RPL26b	RP
YHR010W;YDR471W	P0C2H6;P0C2H7	RPL27a;RPL27b	RP
YGL103W	P02406	RPL28	RP
YIL018W;YFR031C-A	P0CX46;P0CX45	RPL2b;RPL2a	RP
YOR063W	P14126	RPL3	RP
YGL030W	P14120	RPL30	RP
YDL075W	P0C2H8	RPL31a	RP
YLR406C	P0C2H9	RPL31b	RP
YBL092W	P38061	RPL32	RP
YPL143W	P05744	RPL33a	RP
YOR234C	P41056	RPL33b	RP
YER056C-A;YIL052C	P87262;P40525	RPL34a;RPL34b	RP
YDL136W;YDL191W	P0CX85;P0CX84	RPL35b;RPL35a	RP
YMR194W	P05745	RPL36a	RP
YPL249C-A	O14455	RPL36b	RP
YLR185W	P49166	RPL37a	RP
YDR500C	P51402	RPL37b	RP
YLR325C	P49167	RPL38	RP
YJL189W	P04650	RPL39	RP
YHR141C;YNL162W	P0CX28;P0CX27	RPL42b;RPL42a	RP
YPR043W;YJR094W-A	P0CX26;P0CX25	RPL43a;RPL43b	RP
YBR031W	P10664	RPL4a	RP
YDR012W	P49626	RPL4b	RP
YPL131W	P26321	RPL5	RP
YML073C	Q02326	RPL6a	RP
YLR448W	P05739	RPL6b	RP
YGL076C	P05737	RPL7a	RP
YPL198W	Q12213	RPL7b	RP
YHL033C	P17076	RPL8a	RP
YLL045C	P29453	RPL8b	RP
YGL147C	P05738	RPL9a	RP
YNL067W	P51401	RPL9b	RP
YHR027C	P38764	RPN1	RBP
YHR200W	P38886	RPN10	RBP
YFR004W	P43588	RPN11	RBP
YFR052W	P32496	RPN12	NA
YLR421C	O13563	RPN13	NA
YIL075C	P32565	RPN2	RBP
YER021W	P40016	RPN3	RBP
YDL147W	Q12250	RPN5	RBP
YDL097C	Q12377	RPN6	NA
YPR108W	Q06103	RPN7	RBP
YOR261C	Q08723	RPN8	RBP
YDR427W	Q04062	RPN9	RBP
YDL140C	P04050	RPO21	RBP
YLR340W	P05317	RPP0	RP
YDL081C	P05318	RPP1a	RP
YDL130W	P10622	RPP1b	RP
YOL039W	P05319	RPP2a	RP
YDR382W	P02400	RPP2b	RP
YGR214W	P32905	RPS0a	RP
YLR048W	P46654	RPS0b	RP
YOR293W;YMR230W	Q08745;P46784	RPS10a;RPS10b	RP
YBR048W;YDR025W	P0CX48;P0CX47	RPS11b;RPS11a	RP
YOR369C	P48589	RPS12	RP
YDR064W	P05756	RPS13	RP
YCR031C	P06367	RPS14a	RP
YOL040C	Q01855	RPS15	RP
YMR143W;YDL083C	P0CX52;P0CX51	RPS16a;RPS16b	RP
YDR447C;YML024W	P14127;P02407	RPS17b;RPS17a	RP
YML026C;YDR450W	P0CX56;P0CX55	RPS18b;RPS18a	RP
YOL121C	P07280	RPS19a	RP
YNL302C	P07281	RPS19b	RP
YLR441C	P33442	RPS1a	RP
YML063W	P23248	RPS1b	RP
YGL123W	P25443	RPS2	RP
YHL015W	P38701	RPS20	RP
YKR057W	P0C0V8	RPS21a	RP
YJL136C	Q3E754	RPS21b	RP
YLR367W;YJL190C	Q3E7Y3;P0C0W1	RPS22b;RPS22a	RP
YPR132W;YGR118W	P0CX30;P0CX29	RPS23b;RPS23a	RP
YER074W;YIL069C	P0CX32;P0CX31	RPS24a;RPS24b	RP
YGR027C;YLR333C	Q3E792;P0C0T4	RPS25a;RPS25b	RP
YGL189C;YER131W	P39938;P39939	RPS26a;RPS26b	RP
YHR021C;YKL156W	P38711;P35997	RPS27b;RPS27a	RP
YLR388W	P41057	RPS29a	RP
YDL061C	P41058	RPS29b	RP
YNL178W	P05750	RPS3	RP
YOR182C;YLR287C-A	P0CX34;P0CX33	RPS30b;RPS30a	RP
YHR203C;YJR145C	P0CX36;P0CX35	RPS4b;RPS4a	RP
YJR123W	P26783	RPS5	RP
YPL090C;YBR181C	P0CX38;P0CX37	RPS6a;RPS6b	RP
YOR096W	P26786	RPS7a	RP
YNL096C	P48164	RPS7b	RP
YER102W;YBL072C	P0CX40;P0CX39	RPS8b;RPS8a	RP
YBR189W	P05755	RPS9b	RP
YKL145W	P33299	RPT1	RBP
YDL007W	P40327	RPT2	RBP
YDR394W	P33298	RPT3	RBP
YOR259C	P53549	RPT4	RBP
YOR117W	P33297	RPT5	RBP
YGL048C	Q01939	RPT6	RBP
YPL009C	Q12532	RQC2	RBP
YMR131C	Q04225	RRB1	RBP
YPL012W	Q12754	RRP12	RBP
YMR229C	Q05022	RRP5	RBP
YER125W	P39940	RSP5	RBP
YDR233C	Q04947	RTN1	RBP
YDR190C	Q03940	RVB1	RBP
YPL235W	Q12464	RVB2	RBP
YDR388W	P39743	RVS167	RBP
YKL212W	P32368	SAC1	RBP
YDR129C	P32599;REV__P32599	SAC6	RBP
YER043C	P39954	SAH1	RBP
YLR180W	P10659	SAM1	RBP
YDR502C	P19358	SAM2	RBP
YPL273W;YMR321C	Q08985;Q04898	SAM4;YMR321C	RBP
YPL218W	P20606	SAR1	RBP
YKL117W	P28707	SBA1	RBP
YHL034C	P10080	SBP1	RBP
YGL011C	P21243	SCL1	RBP
YJL080C	P06105	SCP160	RBP
YER120W	P40075	SCS2	RBP
YGR245C	P53313	SDA1	RBP
YOL098C	Q12496	SDD3	NA
YKL193C	P36047	SDS22	NA
YLR208W	Q04491	SEC13	RBP
YMR079W;YKL091C	P24280;P33324	SEC14;YKL091C	RBP
YBL050W	P32602	SEC17	NA
YNL287W	P32074	SEC21	RBP
YPR181C	P15303	SEC23	RBP
YIL109C	P40482	SEC24	RBP
YDR238C	P41810	SEC26	RBP
YGL137W	P41811	SEC27	RBP
YIL076W	P40509	SEC28	RBP
YDL195W	P38968	SEC31	RBP
YFL005W	P07560	SEC4	RBP
YFL045C	P07283	SEC53	RBP
YLR378C	P32915	SEC61	NA
YDR170C	P11075	SEC7	RBP
YOR184W	P33330	SER1	RBP
YGR208W	P42941	SER2	NA
YER081W	P40054	SER3	NA
YIL074C	P40510	SER33	NA
YDR023W	P07284	SES1	RBP
YDL168W	P32771	SFA1	NA
YHR098C	P38810	SFB3	NA
YJL145W	P47008	SFH5	NA
YOR021C	Q12314	SFM1	NA
YOR007C	Q12118	SGT2	RBP
YKR043C	P36136	SHB17	RBP
YBR263W	P37292	SHM1	NA
YLR058C	P37291	SHM2	RBP
YBL058W	P34223	SHP1	NA
YNL007C	P25294	SIS1	RBP
YDL047W	P20604	SIT4	NA
YLR398C	P35207	SKI2	RBP
YPR189W	P17883	SKI3	RBP
YGL213C	Q02793	SKI8	NA
YNL243W	P33338	SLA2	NA
YDR515W	Q12034	SLF1	RBP
YGR271W	P53327	SLH1	RBP
YGR229C	P32566	SMI1	NA
YDR510W	Q12306	SMT3	RBP
YOR327C	P33328	SNC2	NA
YGL115W	P12904	SNF4	NA
YJR104C	P00445	SOD1	RBP
YHR008C	P00447	SOD2	NA
YHR163W	P38858	SOL3	NA
YCL054W	P25582	SPB1	NA
YKL184W	P08432	SPE1	NA
YPR069C	Q12074	SPE3	RBP
YEL031W	P39986	SPF1	RBP
YGL207W	P32558	SPT16	RBP
YML010W	P27692	SPT5	RBP
YGR116W	P23615	SPT6	RBP
YIR012W	P35184	SQT1	NA
YCL037C	P25567	SRO9	RBP
YNL189W	Q02821	SRP1	RBP
YPL243W	P38687	SRP68	RBP
YNL138W	P17555	SRV2	RBP
YAL005C	P10591	SSA1	RBP
YLL024C	P10592	SSA2	RBP
YDL229W	P11484	SSB1	RBP
YNL209W	P40150	SSB2	RBP
YJR045C;YEL030W	P0CS90;P39987	SSC1;ECM10	RBP
YDR293C	P24276	SSD1	RBP
YPL106C	P32589	SSE1	RBP
YBR283C	P38353	SSH1	RBP
YHR064C	P38788	SSZ1	RBP
YLR389C	Q06010	STE23	NA
YOR212W	P18851	STE4	NA
YOR027W	P15705	STI1	RBP
YLR150W	P39015	STM1	RBP
YMR125W	P34160	STO1	RBP
YMR054W	P37296	STV1	NA
YDL084W	Q07478	SUB2	RBP
YNL244C	P32911	SUI1	RBP
YJR007W	P20459	SUI2	TF
YPL237W	P09064	SUI3	TF
YDR172W	P05453	SUP35	TF
YBR143C	P12385	SUP45	TF
YDR346C	Q05515	SVF1	NA
YDR395W	Q04175	SXM1	RBP
YPL105C	Q02875	SYH1	RBP
YLR354C;YGR043C	P15019;P53228	TAL1;NQM1	RBP
YDR212W	P12612	TCP1	RBP
YJL052W	P00360	TDH1	RBP
YJR009C	P00358	TDH2	RBP
YGR192C	P00359	TDH3	RBP
YBR118W	P02994	TEF2	TF
YKL081W	P36008	TEF4	TF
YHR025W	P17423	THR1	RBP
YCR053W	P16120	THR4	RBP
YIL078W	P04801	THS1	RBP
YMR260C	P38912	TIF11	TF
YJL138C	P10081	TIF2	TF
YPR163C	P34167	TIF3	TF
YMR146C	P40217	TIF34	TF
YDR429C	Q04067	TIF35	TF
YGR162W	P39935	TIF4631	TF
YGL049C	P39936	TIF4632	TF
YPR041W	P38431	TIF5	TF
YPR016C	Q12522	TIF6	TF
YPR074C	P23254	TKL1	RBP
YIL137C	P40462	TMA108	NA
YOR252W	Q08687	TMA16	NA
YKL056C	P35691	TMA19	RBP
YOR091W	Q12000	TMA46	RBP
YDR117C	Q04600	TMA64	RBP
YDR457W	Q03280	TOM1	NA
YER049W	P40032	TPA1	RBP
YAL016W	P31383	TPD3	NA
YDR050C	P00942	TPI1	RBP
YNL079C	P17536	TPM1	RBP
YBR126C	Q00764	TPS1	RBP
YDR074W	P31688	TPS2	RBP
YMR261C	P38426	TPS3	RBP
YDR120C	P15565	TRM1	RBP
YDL112W	Q07527	TRM3	NA
YDL201W	Q12009	TRM8	NA
YDR165W	Q03774	TRM82	NA
YER090W	P00899	TRP2	RBP
YKL211C	P00937	TRP3	NA
YGL026C	P00931	TRP5	RBP
YDR353W;YHR106W	P29509;P38816	TRR1;TRR2	RBP
YDR472W	Q03337	TRS31	NA
YOR115C	Q99394	TRS33	NA
YLR043C	P22217	TRX1	RBP
YGR209C	P22803	TRX2	RBP
YML028W;YDR453C	P34760;Q04120	TSA1;TSA2	RBP
YML100W	P38427	TSL1	RBP
YDL060W	Q07381	TSR1	RBP
YML085C	P09733	TUB1	RBP
YFL037W	P02557	TUB2	RBP
YML124C	P09734	TUB3	RBP
YOR187W	P02992	TUF1	RBP
YOR251C	Q08686	TUM1	RBP
YCR084C	P16649	TUP1	NA
YMR071C	Q04767	TVP18	NA
YGR185C	P36421	TYS1	RBP
YKL210W	P22515	UBA1	RBP
YLR167W;YIL148W;YKR094C;YLL039C	P05759;P0CH09;P0CH08;P0CG63	Ubiquitin	NA
YER151C	Q01477	UBP3	RBP
YFR010W	P43593	UBP6	RBP
YGR019W	P17649	UGA1	NA
YKL035W	P32861	UGP1	RBP
YKL216W	P28272	URA1	NA
YJL130C	P07259	URA2	RBP
YLR420W	P20051	URA4	NA
YML106W;YMR271C	P13298;P30402	URA5;URA10	RBP
YKL024C	P15700	URA6	NA
YBL039C	P28274	URA7	RBP
YJL109C	P42945	UTP10	RBP
YGR090W	P53254	UTP22	NA
YEL013W	P39968	VAC8	NA
YGR094W	P07806	VAS1	RBP
YLR410W	Q06685	VIP1	RBP
YDL185W	P17255	VMA1	RBP
YPR036W	P41807	VMA13	RBP
YBR127C	P16140	VMA2	RBP
YOR332W	P22203	VMA4	RBP
YKL080W	P31412	VMA5	RBP
YLR447C	P32366	VMA6	RBP
YEL051W	P32610	VMA8	RBP
YOR270C	P32563	VPH1	RBP
YKR001C	P21576	VPS1	RBP
YLL040C	Q07878	VPS13	NA
YOR089C	P36017	VPS21	RBP
YDR372C	Q06385	VPS74	NA
YOL097C	Q12109	WRS1	RBP
YOR230W	Q12363	WTM1	RBP
YGL173C	P22147	XRN1	RBP
YBL036C	P38197	YBL036C	NA
YCR051W	P25631	YCR051W	NA
YCR090C	P25654	YCR090C	RBP
YNL064C	P25491	YDJ1	RBP
YDL086W	Q07505	YDL086W	NA
YDL124W	Q07551	YDL124W	RBP
YDR341C;YHR091C	Q05506;P38714	YDR341C;MSR1	RBP
YLR249W	P16521	YEF3	TF
YEL025C	P39991	YEL025C	NA
YER156C	P40093	YER156C	RBP
YFR006W	P43590	YFR006W	NA
YGR054W	P53235	YGR054W	RBP
YGR210C	P42942	YGR210C	NA
YGR234W	P39676	YHB1	RBP
YHR029C	P38765	YHI9	NA
YHR020W	P38708	YHR020W	RBP
YNL263C	P53845	YIF1	RBP
YNL044W	P53633	YIP3	NA
YJL055W	P47044	YJL055W	NA
YJL068C	P40363	YJL068C	NA
YKR018C	P36114	YKR018C	NA
YKL196C	P36015	YKT6	RBP
YLR179C	Q06252	YLR179C	RBP
YLR419W	Q06698	YLR419W	RBP
YMR027W	Q04371	YMR027W	NA
YMR045C;YBL005W-B;YMR046C;YBL005W-A;YDR170W-A	Q04214;Q12490;Q04215;Q12266;Q03964	YMR045C;YBL005W-B;YMR046C;YBL005W-A;YDR170W-A;	NA
YMR099C	Q03161	YMR099C	RBP
YMR178W	Q03219	YMR178W	RBP
YMR226C	Q05016	YMR226C	RBP
YMR315W	Q04869	YMR315W	RBP
YKL067W	P36010	YNK1	RBP
YNL010W	P53981	YNL010W	RBP
YNL134C;YCR102C;YLR460C	P53912;P25608;P54007	YNL134C;YCR102C;YLR460C	RBP
YNL247W	P53852	YNL247W	RBP
YOL057W	Q08225	YOL057W	NA
YOL103W-B;YOL103W-A	Q12273;Q92392	YOL103W-B;YOL103W-A	NA
YPR028W	Q12402	YOP1	NA
YPL225W	Q08971	YPL225W	RBP
YDR368W	Q12458	YPR1	NA
YPR127W	Q06494	YPR127W	NA
YPR148C	Q06523	YPR148C	NA
YFL038C	P01123	YPT1	RBP
YER031C;YGL210W	P38555;P51996	YPT31;YPT32	RBP
YKR014C	P36018	YPT52	RBP
YML001W	P32939	YPT7	NA
YDR381W	Q12159	YRA1	RBP
YDR002W	P41920	YRB1	RBP
YBR111C	Q01976	YSA1	NA
YOR272W	Q12024	YTM1	NA
YGR211W	P53303	ZPR1	RBP
YGR285C	P32527	ZUO1	RBP
YNL241C	P11412	ZWF1	RBP

## Sheet: Sheet 2 - Proteins by fraction
					Total number of proteins identified in each sample
					Unstressed						H2O2						3-AT						All conditions
					F1	F2	F3	F4	F5	T	F1	F2	F3	F4	F5	T	F1	F2	F3	F4	F5	T	F1-F4	F1-F5
					767	651	563	558	484	710	649	667	573	465	201	700	639	613	536	375	145	699	353	141
					Polysome association profiles: log2(normalised LFQ intensity)
					Unstressed						H2O2						3-AT
Identifier	Uniprot	SGDname	Function	Set	F1	F2	F3	F4	F5	T	F1	F2	F3	F4	F5	T	F1	F2	F3	F4	F5	T
YNL141W	P53909	AAH1	NA	NA	0.0358355	0.181608	0.094	-0.354722	NA	1.09575	-0.702119	-0.302872	-0.0554501	NA	NA	1.20787	-0.770181	-0.163386	0.0604184	NA	NA	1.08677
YHR047C	P37898	AAP1	RBP	NA	-0.0756972	0.0400155	NA	0.0609142	NA	2.7065	0.330868	-0.280795	NA	NA	NA	2.77459	-0.804361	0.497735	NA	NA	NA	2.56871
YLR027C	P23542	AAT2	RBP	F1-F5	-0.0462613	0.228643	0.1456	-0.18692	-0.141062	1.01787	-1.69637	-0.46066	0.133861	0.303209	0.75872	0.838923	-1.57521	-0.0639431	0.418413	0.564241	0.777958	0.826699
YCR088W	P15891	ABP1	RBP	F1-F4	-0.174957	0.301577	0.0928774	-0.240899	0.0214029	0.807849	-1.18053	-0.345293	0.0453054	0.172456	0.367728	0.399974	-0.874941	-0.173414	0.229169	0.43337	NA	0.425713
YOR239W	Q08641	ABP140	RBP	NA	1.18424e-15	NA	NA	NA	NA	0.600857	NA	NA	NA	NA	NA	0.785548	-0.121496	NA	NA	NA	NA	0.695416
YGR037C	P31787	ACB1	NA	NA	0	NA	NA	NA	NA	-0.765004	-1.51212	-1.21304	NA	NA	NA	-0.376997	-0.291157	-1.07207	-0.974097	NA	NA	-1.05013
YNR016C;YMR207C	Q00955;P32874	ACC1;HFA1	RBP	F1-F5	0.0636747	0.0947752	-0.161355	-0.0628207	0.0657262	0.799429	-0.00377885	0.138995	0.724844	0.932832	0.43197	0.688746	-0.818788	-0.384974	-0.0911214	0.158256	-1.5439	0.877824
YLR304C	P19414	ACO1	RBP	F1-F4	0.090016	0.0902286	-0.32813	-0.107073	0.254958	1.58188	-1.438	-0.847446	-0.341401	0.119554	0.200919	1.60943	-1.67487	-1.10322	-0.944286	-0.710674	NA	0.971974
YJL200C	P39533	ACO2	NA	NA	0	NA	NA	NA	NA	0.920539	NA	NA	NA	NA	NA	0.766837	NA	NA	NA	NA	NA	0.35197
YLR153C;YAL054C	P52910;Q01574	ACS2;ACS1	RBP	F1-F4	0.84905	0.245396	-0.0817747	-0.385333	-0.647782	3.63213	0.107169	0.100926	-0.395757	0.638481	NA	3.52214	-0.436356	-0.970226	-1.14073	0.945111	NA	3.25856
YFL039C	P60010	ACT1	RBP	F1-F5	0.20738	0.401591	0.00640037	-0.393407	-0.221965	1.59597	-0.998938	-0.321089	0.00186406	0.0718656	0.541903	1.38274	-0.836871	0.0463258	0.228959	0.569099	0.936391	1.06678
YAR015W	P27616	ADE1	NA	F1-F4	0.640524	0.143784	0.168249	-0.357667	-0.793186	1.1595	-1.09326	-0.205324	-0.464538	-0.705926	NA	1.37206	-0.578717	0.183862	-0.110985	-0.261103	NA	0.989382
YNL220W	P80210	ADE12	RBP	F1-F4	0.268851	0.416225	-0.23804	0.173563	-0.620598	1.44329	-0.967586	0.0483697	-0.169052	-0.71152	NA	1.38272	-0.566384	-0.0950096	-0.901576	-0.764778	NA	1.06195
YLR359W	Q05911	ADE13	RBP	F1-F4	0.368587	0.270766	-0.0919336	-0.252751	-0.294669	2.40641	-0.811193	-0.194164	0.0191018	0.252669	NA	2.19285	-1.18891	-0.811728	-0.997574	-0.553587	NA	1.94919
YLR028C	P54113	ADE16	RBP	NA	0.157307	0.260952	-0.300951	-0.306748	-0.0983412	2.60009	-0.729052	-0.186857	0.0565662	NA	NA	2.62613	-0.968425	-0.541447	NA	NA	NA	2.7619
YMR120C	P38009	ADE17	RBP	F1-F4	0.400349	0.264741	-0.106628	-0.0912809	-0.467181	2.37509	-0.786227	-0.181378	-0.0120746	0.0280589	0.338069	2.34052	-0.76175	-0.655179	-0.724642	-0.409071	NA	2.32701
YOR128C	P21264	ADE2	RBP	F1-F4	0.0284323	0.0542824	-0.159291	-0.203711	0.280286	1.69917	-1.27798	-0.725829	-0.023592	0.48109	1.52154	1.95837	-1.39348	-0.571443	-0.262593	0.0559653	NA	1.40157
YGR204W	P07245	ADE3	RBP	F1-F5	-0.688067	-0.239743	0.0888642	0.413455	0.42549	-2.36106	0.538238	-0.540914	-0.649598	-0.627525	-1.26651	-2.55708	0.299773	-0.484832	-0.538522	-0.426178	-1.83934	-2.52585
YMR300C	P04046	ADE4	RBP	NA	0.00527308	-0.240541	NA	0.175133	NA	3.06957	-0.433091	-0.241988	0.954068	0.8781	1.01723	2.50141	-1.10956	-0.591558	-0.00593946	NA	NA	2.21047
YGL234W	P07244	ADE5,7	RBP	F1-F4	-0.0714711	0.292351	-0.246325	-0.143864	0.169309	1.6801	-0.910747	-0.45189	0.110444	0.596887	-0.91282	1.81088	-1.18227	-0.499016	-0.128137	-0.968756	NA	1.71083
YGR061C	P38972	ADE6	RBP	F1-F4	0.394816	0.380425	-0.363206	-0.346968	-0.0650672	2.90848	-1.44996	-0.39403	-0.0867604	0.0847693	-0.232873	2.76965	-1.40827	-1.04954	-0.752856	-0.609585	NA	2.58487
YOL086C;YMR303C;YBR145W	P00330;P00331;P38113	ADH1;ADH2;ADH5	RBP	F1-F5	0.619931	0.130141	-0.204932	-0.236633	-0.308507	1.59831	-0.758321	-0.17456	-0.277279	-0.419737	-0.392359	1.38027	-0.877984	-0.279372	-0.294633	-0.45239	-0.587867	1.31911
YMR083W	P07246	ADH3	RBP	NA	0.604802	0.318733	-0.470898	-0.318554	-0.335743	1.21846	-1.38488	-0.632199	-0.238412	-0.253485	NA	1.19361	-1.65164	-1.05371	NA	NA	NA	0.660306
YGL256W	P10127	ADH4	NA	NA	0.319912	-0.186741	-0.293128	NA	NA	0.0770829	NA	0.165686	NA	NA	NA	1.39262	-0.751274	NA	NA	NA	NA	1.37239
YMR318C	Q04894	ADH6	RBP	F1-F4	-0.023599	0.276172	0.0841195	-0.269709	-0.0669835	1.15225	-1.29999	-0.673011	-0.00979306	0.245547	0.739138	1.04951	-1.21007	-0.209347	0.1897	0.388213	NA	0.957894
YDR226W	P07170	ADK1	RBP	F1-F4	0.523995	0.493941	-0.196089	-0.45808	-0.485024	0.70744	-0.736766	-0.665722	-0.207053	-0.110932	NA	0.793055	-0.00885309	0.0377671	-0.148435	0.381483	NA	0.48777
YJR105W	P47143	ADO1	RBP	F1-F5	0.703735	0.273308	-0.0637865	-0.455179	-0.458078	1.58715	-0.43396	-0.0887967	-0.376871	-0.562778	-0.0249521	1.55293	-0.168628	0.141525	-0.191156	-0.25237	-0.0645663	1.33903
YDR214W	Q12449	AHA1	RBP	NA	-0.278006	0.275887	-0.0504197	0.0535975	NA	0.155722	-0.230854	-0.0377938	0.161356	NA	NA	0.28273	-0.601751	-0.048348	NA	NA	NA	0.369954
YLR109W	P38013	AHP1	RBP	F1-F5	0.755349	0.346546	-0.194587	-0.506934	-0.400374	1.58324	-0.639126	-0.1322	-0.235035	-0.509213	-1.00577	1.50519	0.00108207	-0.0173517	-0.149459	-0.196581	-0.902942	1.27575
YER080W	P40053	AIM9	RBP	NA	-0.294124	0.294124	NA	NA	NA	0.518989	NA	NA	NA	NA	NA	0.683871	NA	NA	NA	NA	NA	0.208617
YMR092C	P46680	AIP1	RBP	F1-F4	0.356494	0.338812	-0.218203	-0.341003	-0.254201	3.08167	-0.894641	-0.276829	-0.0500775	0.0870363	NA	3.05144	-1.06667	-0.304395	0.0233359	-0.0372774	NA	3.0575
YDR264C	P39010	AKR1	NA	NA	0.470237	-0.108099	-0.724275	NA	NA	-1.87298	-0.303217	0.12574	-0.386146	NA	NA	-2.03006	-0.678327	-0.156997	-0.301605	NA	NA	-2.40254
YOR335C	P40825	ALA1	RBP	F1-F4	-0.193599	0.0896736	0.00877013	-0.067782	0.162937	1.57001	-0.877235	-0.63802	0.21689	0.585071	0.586507	1.61459	-1.27507	-0.506318	-0.107194	0.276442	NA	1.42659
YJL122W	P47019	ALB1	NA	NA	0.659041	-1.31808	NA	NA	NA	-2.56053	-0.964007	-1.13929	NA	NA	NA	-2.46642	-0.552288	-1.39243	NA	NA	NA	-2.59304
YOR374W	P46367	ALD4	RBP	NA	0.27941	0.0792807	0.140536	-0.438778	-0.226859	1.98103	-1.42417	-0.66086	-0.444634	0.550102	NA	1.90817	-2.33558	-1.07601	-0.768686	NA	NA	1.45854
YER073W	P40047	ALD5	RBP	NA	-0.547214	0.218621	0.120269	0.0197471	0.377565	0.546036	-0.205195	-0.207439	0.781348	0.681212	NA	0.23286	-0.304843	0.103836	NA	NA	NA	0.29528
YPL061W	P54115	ALD6	RBP	F1-F5	0.266387	0.213632	-0.0936508	-0.277614	-0.108755	1.77679	-1.12618	-0.423152	-0.079907	0.213234	0.367145	1.95461	-1.10538	-0.501757	-0.245347	0.227275	-0.0114947	1.7539
YML035C	P15274	AMD1	RBP	NA	0.00804301	-0.016086	NA	NA	NA	1.29378	0.0568832	-0.0909516	NA	NA	NA	0.834977	0.330879	NA	NA	NA	NA	0.421621
YCL050C	P16550	APA1	RBP	NA	0.578437	0.195709	-0.367587	-0.622316	-0.149378	1.19514	-0.262799	-0.554957	-0.602377	NA	NA	1.37392	-0.0150982	-0.0610266	NA	NA	NA	1.47303
YKL103C	P14904	APE1	NA	NA	-1.18424e-15	NA	NA	NA	NA	1.03167	-0.403591	NA	NA	NA	NA	0.897841	NA	NA	NA	NA	NA	0.819692
YKL157W	P32454	APE2	RBP	NA	0.303486	0.909385	-0.25683	-0.558299	-0.170396	3.20179	-1.8819	-0.720939	0.0976357	0.463755	NA	2.93731	-2.29274	-1.10823	-1.29191	NA	NA	2.83762
YBR286W	P37302	APE3	RBP	NA	0.38027	0.190254	-0.274446	-0.685368	0.599261	3.18943	-0.520345	-0.394303	-0.165675	NA	NA	3.20638	-1.07137	-0.583207	-0.805301	NA	NA	3.01213
YML022W	P49435	APT1	RBP	NA	0.377837	0.267641	0.102622	-0.497017	-0.30057	0.462722	-1.43868	-0.602286	-0.380828	-0.287414	NA	0.614498	-1.26574	-0.22634	0.110731	NA	NA	0.432701
YBR149W	P38115	ARA1	NA	NA	0.311584	-0.131713	0.331743	-0.259002	-0.339351	1.20669	-0.773582	-0.419153	-0.527172	NA	NA	1.41368	-0.4329	0.230621	0.230407	NA	NA	1.24335
YER036C	P40024	ARB1	RBP	F1-F4	0.554949	-0.0270046	-0.295302	-0.186426	-0.0462157	-0.586808	0.991393	-0.410942	-0.451727	-0.408837	NA	-0.625222	1.10996	-0.152008	-0.218608	-0.1896	NA	-0.385273
YGL105W	P46672	ARC1	RBP	F1-F4	0.447397	0.611874	-0.821521	-0.167916	-0.366952	1.34999	0.145311	0.234591	-0.11505	0.341229	NA	1.42984	0.20769	-0.619725	-0.0976141	0.284926	NA	1.29771
YKL013C	P33204	ARC19	RBP	NA	-0.352939	-0.139392	0.103746	0.0767943	0.605759	1.10483	NA	-0.269275	0.192432	0.442706	NA	1.20291	NA	-0.207449	NA	NA	NA	1.48105
YNR035C	P53731	ARC35	RBP	NA	0	NA	NA	NA	NA	1.6771	-0.255396	NA	NA	NA	NA	1.30543	-0.0253275	NA	NA	NA	NA	1.35669
YBR234C	P38328	ARC40	RBP	NA	-0.2061	-0.0112766	0.0287092	0.263178	NA	1.11137	-0.362861	-0.103352	0.370184	NA	NA	1.19383	-0.637973	NA	NA	NA	NA	1.52747
YHR013C	P07347	ARD1	NA	F1-F4	-0.883363	-0.398587	0.426173	0.34325	0.512528	-2.39304	-0.307223	-0.431416	0.0481924	0.497706	NA	-2.30475	-1.11932	-0.800789	0.0164736	0.276505	NA	-2.50607
YDL192W	P11076	ARF1	RBP	NA	-0.0214526	0.479508	-0.051747	-0.00171913	-0.622031	0.898679	-0.641891	-0.280321	0.907069	0.738742	NA	0.488214	-0.639302	0.0618841	0.734969	NA	NA	0.938972
YDL137W	P19146	ARF2	RBP	NA	1.18424e-15	NA	NA	NA	NA	1.20625	NA	NA	NA	NA	NA	1.12637	0.00766979	NA	NA	NA	NA	1.47048
YOL058W	P22768	ARG1	NA	NA	0.582938	0.0284141	-0.60752	0.164921	-0.320633	2.4337	-0.104259	0.35599	-0.188342	0.0292472	NA	2.59513	-0.568918	-0.0883771	1.01767	NA	NA	2.39059
YHR018C	P04076	ARG4	NA	NA	0.0264382	-0.0997503	0.0468738	NA	NA	2.62499	-0.861028	-0.392077	-0.241776	NA	NA	2.67503	-0.596959	0.0240659	0.436348	NA	NA	2.05062
YER069W	Q01217	ARG5,6	NA	NA	-0.566968	-0.067093	-0.170617	0.280699	0.35033	NA	-0.12989	-0.163588	-0.150073	0.02163	NA	NA	NA	-0.323409	-0.195854	NA	NA	NA
YGL157W	P53111	ARI1	RBP	NA	0	NA	NA	NA	NA	1.08453	-0.200927	NA	NA	NA	NA	0.910425	0.0330696	NA	NA	NA	NA	0.628958
YBR164C	P38116	ARL1	RBP	NA	0	NA	NA	NA	NA	0.23029	NA	NA	NA	NA	NA	0.166267	NA	NA	NA	NA	NA	0.266251
YDR127W	P08566	ARO1	RBP	F1-F4	1.38847	-0.0634286	-0.67691	0.29758	-0.945712	3.42245	1.16702	0.923079	1.0315	-0.0848677	NA	3.3779	-0.190281	-0.0211896	-1.42859	-2.01679	NA	3.22407
YGL148W	P28777	ARO2	RBP	F1-F4	0.0961564	0.285674	-0.128091	-0.286484	0.0436584	0.622585	-0.901758	-0.56911	-0.240374	0.0439637	NA	0.555324	-1.02743	-0.656698	-0.237417	0.414027	NA	0.381543
YDR035W	P14843	ARO3	RBP	NA	-0.0699709	0.0699709	NA	NA	NA	1.43084	NA	NA	NA	NA	NA	1.19053	NA	NA	NA	NA	NA	1.11882
YBR249C	P32449	ARO4	RBP	F1-F4	0.468839	0.417184	-0.0762371	-0.458895	-0.350892	1.37492	-0.796854	-0.476538	-0.587164	-0.311009	NA	1.78695	-0.649584	0.221972	0.24777	0.45909	NA	1.61422
YPR060C	P32178	ARO7	NA	NA	-1.77636e-15	NA	NA	NA	NA	0.324301	NA	NA	NA	NA	NA	0.323998	NA	NA	NA	NA	NA	0.575115
YGL202W	P53090	ARO8	RBP	F1-F4	0.067372	0.218305	0.0120117	-0.253623	-0.044066	1.3726	-1.50618	-0.532491	-0.0414185	0.0307093	-0.733844	1.3178	-1.5288	-0.373412	-0.38882	-0.00532023	NA	1.18119
YDL029W	P32381	ARP2	RBP	NA	-0.471887	0.283979	NA	0.375816	NA	1.8268	-0.760238	-0.465421	NA	NA	NA	1.52293	-1.07353	-0.11517	1.05332	NA	NA	1.32955
YJR065C	P47117	ARP3	RBP	NA	0.239731	0.252289	-0.723691	-0.173567	NA	0.96329	-0.683994	-0.325176	0.0826835	NA	NA	1.26997	-1.06204	-0.54835	0.530546	NA	NA	0.959135
YDR101C	Q03862	ARX1	RBP	F1-F4	1.9833	0.282428	-0.508647	-0.859984	-0.897095	-0.606296	1.51936	0.0770846	-0.187302	-0.479237	NA	-1.01386	1.06531	-0.0339787	-0.673124	-0.829307	NA	-0.77865
YMR116C	P38011	ASC1	RP	F1-F5	-0.228055	-0.240724	0.0634914	0.249638	0.155649	-2.26852	1.37714	0.301758	-0.41769	-0.688517	-1.19581	-2.20121	1.18898	0.069243	-0.281767	-0.58025	-1.2037	-2.01176
YPR145W	P49089	ASN1	RBP	NA	0.318621	-0.210257	0.301368	-0.501377	-0.272531	2.9164	-0.604675	-0.70387	0.0140941	0.291111	NA	2.88129	-1.59387	-0.801813	-0.229082	NA	NA	2.59607
YGR124W	P49090	ASN2	RBP	F1-F4	0.175822	0.198774	0.0670845	-0.326485	-0.115196	2.72598	-1.25652	-0.34706	-0.574289	-0.620972	-1.3531	2.589	-1.40261	-0.503398	-1.58366	-0.714366	NA	2.42306
YDR321W	P38986	ASP1	NA	F1-F5	-0.289769	0.56405	-0.224689	-0.164967	0.059202	-0.261359	-1.15781	0.13379	1.32652	1.36263	2.49984	-0.0200564	-1.43255	0.28996	0.727945	1.16684	1.69793	-0.143798
YBL099W	P07251	ATP1	RBP	F1-F4	0.0105063	0.093155	0.0932148	-0.175065	-0.0218108	0.464996	-2.0775	-0.659231	-0.167021	-0.176901	-0.693705	0.139611	-2.40896	-0.615251	-0.439855	-0.557186	NA	-0.214668
YJR121W	P00830	ATP2	RBP	F1-F5	0.0780373	0.289948	0.00359368	-0.185171	-0.186408	0.3053	-1.65385	-0.420211	-0.107323	-0.0157807	0.472731	0.165691	-1.7197	-0.572013	-0.210369	-0.29932	0.642906	-0.263863
YHR208W	P38891	BAT1	RBP	F1-F4	0.299001	0.277266	-0.11797	-0.24716	-0.211137	1.11957	-1.72013	-0.61505	-0.556844	-0.102928	NA	1.09836	-1.7321	-0.557225	-0.565658	-0.354051	NA	0.831822
YDR361C	Q06338	BCP1	NA	NA	1.77636e-15	NA	NA	NA	NA	-0.00181654	NA	NA	NA	NA	NA	0.103055	NA	NA	NA	NA	NA	0.141795
YIL033C	P07278	BCY1	RBP	NA	0	NA	NA	NA	NA	1.00662	NA	NA	NA	NA	NA	0.753323	NA	NA	NA	NA	NA	0.822331
YAL060W	P39714	BDH1	NA	NA	-1.77636e-15	NA	NA	NA	NA	0.300155	NA	NA	NA	NA	NA	0.100562	NA	NA	NA	NA	NA	0.106941
YOR198C	P38934	BFR1	RBP	F1-F5	-2.14263	0.00655853	0.392785	0.851446	0.891844	-3.03006	-0.715451	1.02421	2.30269	2.23869	1.61307	-3.3097	-0.6987	1.84006	2.56979	2.53765	0.412692	-2.88952
YER177W	P29311	BMH1	RBP	F1-F5	-0.176014	0.252477	0.0819364	-0.239661	0.0426926	1.10843	-1.51021	-0.651506	-0.0537182	0.241657	0.591604	1.03772	-1.97241	-0.162674	0.0425758	0.601989	0.920492	0.689759
YDR099W	P34730	BMH2	RBP	F1-F5	0.0367559	0.0257642	0.0451105	-0.120267	0.0218251	1.26288	-1.2676	-0.343026	-0.124281	0.258247	1.08076	0.857074	-1.15118	0.176396	-0.224877	0.385116	1.05565	0.744079
YLR231C	Q05979	BNA5	NA	NA	0	NA	NA	NA	NA	NA	NA	NA	NA	NA	NA	0.469149	NA	NA	NA	NA	NA	NA
YNR051C	P53741	BRE5	RBP	NA	NA	NA	-1.06377	0.640367	-0.144641	NA	NA	-0.989679	-0.274852	0.251358	NA	NA	NA	-1.00803	0.0608711	-0.090247	NA	NA
YOL077C	Q08235	BRX1	RBP	NA	-1.77636e-15	NA	NA	NA	NA	NA	0.238623	-0.0666439	NA	NA	NA	NA	NA	0.117338	NA	NA	NA	NA
YFL028C	P43569	CAF16	NA	NA	-8.88178e-16	NA	NA	NA	NA	1.49899	NA	NA	NA	NA	NA	1.35321	NA	NA	NA	NA	NA	1.41022
YOR276W	P12962	CAF20	RBP	NA	NA	1.77636e-15	NA	NA	NA	NA	NA	-0.134919	NA	NA	NA	-2.12207	NA	NA	NA	NA	NA	NA
YPL048W	P29547	CAM1	TF	F1-F4	0.620485	0.47311	-0.115274	-0.417706	-0.560614	0.552312	-0.586407	0.231127	-0.0281772	-0.0269115	0.407907	0.369706	-0.547435	0.291368	0.180833	0.413104	NA	0.231035
YKL007W	P28495	CAP1	RBP	NA	-0.0887198	0.181482	-0.0947841	NA	NA	0.80594	-0.666418	-0.131057	NA	NA	NA	0.548646	NA	NA	NA	NA	NA	0.623332
YPL111W	P00812	CAR1	RBP	NA	0.0137974	0.127536	-0.155131	NA	NA	1.05799	-1.20157	-0.629311	NA	NA	NA	0.830804	NA	-0.419386	NA	NA	NA	0.796406
YLR438W	P07991	CAR2	RBP	NA	8.88178e-16	NA	NA	NA	NA	0.298012	-0.863578	-0.483937	NA	NA	NA	0.281259	-0.95405	NA	NA	NA	NA	0.400947
YLR175W	P33322	CBF5	RBP	NA	0.335466	-0.447288	NA	NA	NA	-0.252064	0.955574	0.672913	0.795965	NA	NA	-0.137016	0.88462	0.108079	NA	NA	NA	-0.117892
YAL021C	P31384	CCR4	RBP	NA	NA	NA	NA	-1.77636e-15	NA	NA	NA	NA	-0.210052	NA	NA	NA	NA	-0.865099	-0.482448	NA	NA	NA
YMR038C	P40202	CCS1	RBP	NA	-1.77636e-15	NA	NA	NA	NA	0.7513	NA	NA	NA	NA	NA	1.02918	NA	NA	NA	NA	NA	0.983702
YIL142W	P39076	CCT2	RBP	F1-F4	0.23319	-0.0430102	-0.0312437	-0.157852	-0.00108387	0.460775	-0.277672	-0.132263	0.260477	0.139976	0.250294	0.634084	-0.542804	-0.00733689	0.339751	0.424172	NA	0.602267
YJL014W	P39077	CCT3	RBP	F1-F4	0.0522785	-0.207526	-0.0645454	0.0782512	0.141542	0.423838	-0.696295	-0.389667	0.360986	0.442115	NA	0.226119	-0.932322	-0.371395	-0.18453	0.26698	NA	0.32333
YDL143W	P39078	CCT4	RBP	F1-F4	0.107353	0.0124851	-0.0598941	-0.213451	0.153507	0.500294	-0.335421	-0.163642	0.060645	0.24316	NA	0.2148	-0.64015	-0.419781	-0.0353047	0.28354	NA	0.376089
YJR064W	P40413	CCT5	RBP	NA	-0.194775	0.000100641	-0.108841	0.131307	0.355699	1.17645	-0.323763	0.0808737	0.853901	0.673134	NA	1.18839	-0.567842	0.302315	0.142645	NA	NA	1.38916
YDR188W	P39079	CCT6	NA	F1-F4	0.159464	0.264096	-0.304417	-0.123333	-0.0719149	1.07377	-0.361687	-0.245709	0.0897441	0.489643	NA	0.764303	-0.682825	-0.251416	-0.144946	0.160713	NA	0.842284
YJL111W	P42943	CCT7	RBP	F1-F4	0.0298584	0.0750876	-0.00138158	-0.1635	0.0599356	0.270445	-0.950146	-0.307479	0.054246	0.280629	0.357031	-0.0504754	-1.33161	-0.427614	0.0312488	0.492363	NA	0.00448281
YJL008C	P47079	CCT8	RBP	F1-F4	-0.0321372	-0.0312286	-0.0635794	-0.00354572	0.130491	0.279729	-0.450853	-0.206572	0.2284	0.535251	0.623893	0.244009	-0.768101	-0.203249	-0.000125756	0.374667	NA	-0.0317364
YDR182W	P40986	CDC1	NA	NA	1.18424e-15	NA	NA	NA	NA	NA	-0.642981	-0.751559	NA	NA	NA	NA	-0.928195	NA	NA	NA	NA	NA
YAL038W	P00549	CDC19	RBP	F1-F5	0.117552	0.136422	-0.092255	-0.121467	-0.0402512	1.56585	-1.1955	-0.434665	-0.0931592	0.143333	0.438682	1.44398	-1.25587	-0.437013	-0.305333	0.219726	0.133441	1.39474
YOL139C	P07260	CDC33	TF	F1-F4	-0.500345	0.532459	0.274397	0.133751	-0.440261	-2.29814	-1.38596	-0.360323	-0.531048	-0.864841	NA	-2.07609	-1.20678	-0.0969629	-0.256908	-1.00556	NA	-2.57537
YCR093W	P25655	CDC39	RBP	F1-F4	-1.97893	-0.432159	0.377967	0.990688	1.04244	-2.19468	-1.65286	-0.596059	1.11452	0.607204	NA	-2.18741	-2.09556	-0.10256	1.35321	1.07468	NA	-2.1175
YDL126C	P25694	CDC48	RBP	F1-F4	0.125628	0.26539	-0.000662963	-0.357461	-0.0328938	1.74987	-1.33912	-0.418421	0.382376	0.418384	0.64494	1.28338	-1.22792	-0.448158	-0.0774933	-0.0873796	NA	1.65832
YPL160W	P26637	CDC60	RBP	F1-F5	-0.172373	0.163845	-0.0139374	-0.0621527	0.0846181	1.73574	-1.02098	-0.431317	0.154385	0.379486	0.589955	1.80701	-1.20436	-0.505293	-0.124684	0.496904	0.0850021	1.79273
YGL206C	P22137	CHC1	RBP	F1-F4	0.322269	0.0215783	-0.09288	-0.052207	-0.221981	1.61599	0.746357	0.339904	0.774047	0.351182	NA	1.6858	-1.30055	-0.264804	0.0374391	-0.54864	NA	1.70774
YLR330W	Q12114	CHS5	RBP	NA	0.0755598	-0.11334	NA	NA	NA	-0.194551	NA	-0.0107924	0.109933	NA	NA	NA	NA	NA	NA	NA	NA	NA
YHR052W	P38779	CIC1	RBP	NA	-8.88178e-16	NA	NA	NA	NA	-3.42059	-1.08366	-1.85659	NA	NA	NA	NA	-1.25724	-2.25735	NA	NA	NA	-2.90618
YNR001C	P00890	CIT1	NA	NA	1.84792	-0.268303	-0.779193	-0.610077	-0.537662	-0.20112	2.12617	-0.734254	-0.898778	NA	NA	-0.0457871	0.231763	-1.16192	-0.275518	NA	NA	-0.46221
YMR012W	Q03690	CLU1	RBP	F1-F5	-2.00771	-1.02128	-0.161453	1.09333	2.09711	-2.21285	-0.364431	-0.0497338	1.08508	1.56696	1.12266	-2.11686	-0.55855	0.235656	1.06499	1.3766	-0.0804903	-2.28471
YLL050C	Q03048	COF1	RBP	F1-F4	0.501979	0.413814	0.0604995	-0.356302	-0.61999	0.602319	-1.244	-0.299407	-0.24328	-0.552347	NA	0.617717	-0.745405	-0.119776	0.00225414	-0.28512	NA	0.618303
YDL145C	P53622	COP1	RBP	F1-F4	0.46426	0.0631475	-0.106952	-0.210567	-0.209889	0.385835	-0.324191	-0.11458	0.314764	0.0218657	NA	0.35104	-0.651087	-0.119275	-0.0666691	0.0128502	NA	0.485181
YBL045C	P07256	COR1	NA	NA	-0.0245077	0.0326769	NA	NA	NA	0.356722	-0.405549	-0.132765	NA	NA	NA	0.289659	NA	NA	NA	NA	NA	-0.0668842
YKL179C	P34237	COY1	NA	NA	1.77636e-15	NA	NA	NA	NA	NA	NA	NA	NA	NA	NA	NA	NA	NA	NA	NA	NA	NA
YOR303W	P07258	CPA1	RBP	NA	-0.103908	0.11816	-0.007522	0.0971768	NA	1.43797	NA	-0.100749	0.310137	NA	NA	0.957828	NA	-0.20114	NA	NA	NA	1.26838
YJR109C	P03965	CPA2	RBP	F1-F4	0.243896	0.156554	-0.25957	0.110074	-0.250953	2.71835	-0.937126	-0.0938175	0.556131	0.539236	-0.121339	2.48835	-0.912904	-0.326376	0.269873	0.0296556	NA	2.49675
YDR155C	P14832	CPR1	RBP	F1-F5	0.684224	0.413466	-0.0199245	-0.671581	-0.406185	1.0291	-0.334753	-0.0605544	-0.166272	-0.393178	-0.349811	1.0423	0.578965	0.214282	0.242876	0.396555	0.37243	0.864725
YML078W	P25719	CPR3	NA	NA	0.0180809	-0.0241079	NA	NA	NA	-0.170328	NA	NA	0.00900841	NA	NA	-0.133046	NA	NA	NA	NA	NA	-0.478936
YLR216C	P53691	CPR6	RBP	NA	0.64696	-0.022581	-0.0797278	-0.283507	-0.562151	1.09994	-0.170398	-0.0179437	0.226076	-0.191768	NA	1.49943	0.247252	0.241775	0.124765	NA	NA	1.37116
YJL172W	P27614	CPS1	NA	NA	-1.18424e-15	NA	NA	NA	NA	0.973297	0.228784	NA	NA	NA	NA	0.847061	-0.32774	NA	NA	NA	NA	0.883342
YGR218W	P30822	CRM1	RBP	NA	-0.199441	-0.0435562	0.025443	-0.012	0.314554	2.51228	-0.548587	-0.280498	-0.621925	NA	NA	2.07997	-0.981704	-0.920324	-0.367504	NA	NA	2.13303
YLR429W	Q06440	CRN1	NA	NA	-0.0884645	0.0884645	NA	NA	NA	0.48688	-0.564293	0.166508	0.94015	NA	NA	0.37947	NA	NA	NA	NA	NA	0.0429855
YGL238W	P33307	CSE1	NA	NA	-1.18424e-15	NA	NA	NA	NA	1.86037	NA	NA	NA	NA	NA	1.70127	NA	NA	NA	NA	NA	1.32421
YOL007C	Q08054	CSI2	NA	NA	NA	-0.333021	0.00528433	0.494247	NA	NA	NA	NA	0.160153	0.798473	NA	NA	NA	NA	NA	NA	NA	NA
YAL012W	P31373	CYS3	RBP	F1-F5	0.0989859	0.275747	-0.0491853	-0.239708	-0.0858397	1.13426	-1.241	-0.49184	-0.269285	-0.0499282	0.273415	1.22018	-1.38269	-0.584567	-0.328876	0.143599	0.190874	0.829272
YGR155W	P32582	CYS4	RBP	F1-F4	0.355117	0.176824	-0.180919	-0.217259	-0.133763	1.55223	-1.12357	-0.600253	-0.324626	-0.631914	-0.0360969	1.56646	-1.43399	-0.83314	-0.624272	-0.427797	NA	1.28914
YML070W	P54838	DAK1	RBP	F1-F4	0.305331	0.199506	0.228178	-0.353524	-0.322447	2.02208	-1.87809	-0.745906	-0.221776	0.0999616	NA	1.86191	-2.17303	-0.767102	-0.678917	0.504052	NA	1.6957
YNL112W	P24783	DBP2	RBP	F1-F4	1.96488	0.564621	-0.233184	-0.743188	-1.55313	-0.74907	3.39887	1.51215	0.147911	-0.756439	NA	-1.23206	3.05236	0.825145	-0.58479	-1.75354	NA	-0.521747
YGL078C	P20447	DBP3	RBP	NA	-0.0688202	0.13764	NA	NA	NA	-0.768348	0.230743	-0.183535	NA	NA	NA	-0.444758	0.396502	0.0375913	NA	NA	NA	-0.498332
YOR046C	P20449	DBP5	RBP	F1-F4	-0.14626	-0.0488357	0.0213254	0.0155256	0.210993	-0.0516917	-0.399907	-0.189964	0.293474	0.414616	NA	-0.105025	-0.103582	-0.0881799	0.283505	0.50745	NA	-0.0496447
YLR270W	Q06151	DCS1	NA	NA	-0.121882	0.551333	-0.30757	NA	NA	0.667506	NA	-0.479169	NA	NA	NA	0.560816	NA	NA	-0.155318	NA	NA	0.671832
YOR204W;YPL119C	P06634;P24784	DED1;DBP1	TF	F1-F5	-0.124807	0.290326	-0.096808	-0.000180944	-0.0685304	-1.66334	0.109484	-0.35796	-0.257458	-0.0416582	-0.801667	-1.84799	-0.156743	-0.466712	-0.218123	-0.190043	-0.487965	-1.57849
YHR019C	P38707	DED81	RBP	F1-F5	-0.0831892	0.0995003	0.0462258	-0.108372	0.0458353	1.66235	-0.494237	-0.271285	0.0401993	-0.0510779	0.091525	1.53628	-0.791293	-0.283635	-0.286259	-0.116995	-1.42228	1.75526
YDL160C	P39517	DHH1	RBP	F1-F4	-0.854295	0.0169998	0.153662	0.353184	0.33045	-0.740579	-0.961247	-0.528024	0.246755	0.346717	NA	-0.882632	-1.11225	-0.265013	0.450667	0.535625	NA	-0.91938
YPL266W	P41819	DIM1	RBP	NA	0.470724	-0.282135	-0.340467	-0.0888893	NA	-0.83164	1.99625	0.718963	0.0797457	NA	NA	-1.19667	1.87041	0.481818	0.222361	NA	NA	-0.900344
YOL021C	Q08162	DIS3	RBP	NA	-1.77636e-15	NA	NA	NA	NA	NA	NA	NA	NA	NA	NA	NA	NA	NA	NA	NA	NA	NA
YEL071W	P39976	DLD3	RBP	F1-F4	0.696783	0.089674	-0.303002	0.104978	-0.664183	1.79288	-1.07288	0.0460641	-1.46483	-0.485366	-0.470687	1.79917	-0.936016	-0.128915	-0.326865	-0.681328	NA	1.50652
YER166W	P32660	DNF1	NA	NA	1.18424e-15	NA	NA	NA	NA	NA	NA	NA	NA	NA	NA	NA	NA	NA	NA	NA	NA	NA
YHR044C;YHR043C	P38774;P38773	DOG1;DOG2	NA	NA	0.138191	-0.207286	NA	NA	NA	0.144891	NA	NA	-0.317422	NA	NA	0.221837	NA	-0.194773	NA	NA	NA	0.0341394
YNL001W	P33309	DOM34	NA	NA	2.01513	-2.01513	NA	NA	NA	-2.81833	-0.804526	-2.06878	-1.36169	NA	NA	-3.18928	-0.457151	NA	NA	NA	NA	-2.48696
YPR183W	P14020	DPM1	RBP	NA	-0.201968	-0.313012	0.472627	0.144818	-0.0834159	-2.15404	-0.754591	1.45763	1.52399	0.817137	NA	-2.35049	-0.0253175	1.24116	1.142	NA	NA	-1.79819
YLL018C	P04802	DPS1	RBP	F1-F5	-0.162147	0.0587211	0.0680311	-0.0562457	0.091641	0.970558	-0.653491	-0.338337	-0.18939	0.185767	-0.00768073	0.931765	-0.812255	-0.48934	-0.182894	0.0179256	-0.614011	1.05884
YFR044C	P43616	DUG1	RBP	F1-F4	0.320049	0.246885	-0.0642176	-0.189692	-0.313024	1.31216	-1.58478	-0.671974	-0.162782	-0.100874	0.378229	1.30592	-1.7624	-0.469598	-0.372011	0.118752	NA	1.01303
YHR068W	P38791	DYS1	NA	NA	0.806624	0.656614	-0.218237	-0.379366	-0.920195	2.58608	-1.5148	-0.403268	-0.341508	-0.488944	NA	2.27623	-1.5251	-1.11849	-0.732281	NA	NA	2.38721
YHL030W	P38737	ECM29	NA	NA	-1.18424e-15	NA	NA	NA	NA	0.119369	NA	NA	NA	NA	NA	0.0608569	NA	NA	NA	NA	NA	-0.354297
YER176W	P32644	ECM32	RBP	NA	NA	-0.0852227	NA	0.127834	NA	NA	NA	-0.11494	0.667247	NA	NA	NA	NA	0.281002	0.50493	NA	NA	NA
YBR078W	P38248	ECM33	RBP	NA	-0.080274	0.217898	-0.0627352	-0.111646	0.028098	-0.321252	NA	-0.160386	0.220403	0.107853	NA	-0.453898	NA	-0.499698	-0.324181	0.105732	NA	-0.988245
YAL003W	P32471	EFB1	TF	F1-F5	0.171577	0.301587	0.110939	-0.350253	-0.233851	0.466265	-0.497305	-0.278676	-0.0334971	-0.104756	-0.215282	0.432515	-0.235594	0.123175	0.0395499	0.137491	-0.122026	0.051423
YDR385W	P32324	EFT2	TF	F1-F5	0.018571	0.0692011	-0.164544	-0.0230697	0.0998419	1.37898	1.76507	0.502407	0.152298	0.137682	0.0148169	1.35351	1.44456	0.0888505	-0.268772	0.0131121	-0.451866	1.27833
YPL037C	Q02642	EGD1	RBP	F1-F4	0.635641	-0.00398696	-0.851342	0.0396138	-0.0436829	-2.13473	1.57654	-0.487403	0.0894119	0.0996238	NA	-1.44133	2.22625	-0.106855	0.0233125	0.383939	NA	-1.03427
YHR193C	P38879	EGD2	RBP	F1-F5	0.107363	0.144212	-0.170845	-0.0631351	-0.017595	-2.66664	0.0355829	-0.76271	-0.856494	-0.754789	-0.944891	-2.84037	-0.126768	-0.544843	-0.562873	-0.335413	-0.681373	-2.39047
YGR200C	P42935	ELP2	NA	NA	-0.243585	-0.210997	0.171854	0.244396	0.387416	0.623421	-0.533399	-0.227096	NA	NA	NA	0.0939351	-0.355776	0.0292965	NA	NA	NA	0.450142
YPL086C	Q02908	ELP3	RBP	NA	0.185081	0.151312	-0.444003	-0.0516475	NA	-0.581878	0.362732	0.322129	0.905109	1.29149	NA	-0.327206	0.266794	-0.288024	0.349349	NA	NA	-0.379028
YLR186W	Q06287	EMG1	RBP	NA	-0.148833	0.184102	-0.161416	-0.111913	0.226304	-1.24998	NA	0.38071	0.130506	NA	NA	-1.3398	-0.536855	0.534887	0.302951	NA	NA	-1.33955
YDR516C	Q04409	EMI2	RBP	NA	1.77636e-15	NA	NA	NA	NA	1.99174	NA	NA	NA	NA	NA	1.66179	NA	NA	NA	NA	NA	1.43022
YFL048C	P43555	EMP47	NA	NA	-8.88178e-16	NA	NA	NA	NA	-1.96022	-0.748176	-0.895378	NA	NA	NA	NA	-0.434973	-1.06721	NA	NA	NA	NA
YLR083C	P32802	EMP70	NA	NA	0.259884	-0.259884	NA	NA	NA	NA	-1.65389	-0.143809	NA	NA	NA	-2.76689	NA	-0.359072	NA	NA	NA	NA
YGR254W	P00924	ENO1	RBP	F1-F5	0.213822	0.315022	-0.00233232	-0.301457	-0.225055	0.702015	-1.48638	-0.456152	-0.170102	-0.105107	-0.107049	0.947329	-1.29978	-0.402645	-0.13516	0.0884266	0.155766	0.792894
YHR174W	P00925	ENO2	RBP	F1-F5	0.312675	0.212599	-0.0656499	-0.299558	-0.160066	1.29039	-0.974461	-0.344377	-0.218635	-0.0195867	-0.0483367	1.15718	-0.663419	-0.186077	-0.00194918	0.0461768	0.0901997	1.00052
YBR247C	P38333	ENP1	RBP	NA	0.354315	-0.47242	NA	NA	NA	-0.864291	-0.216881	-0.534995	NA	NA	NA	-0.739478	-0.481904	-0.521907	NA	NA	NA	-0.749084
YMR049C	Q04660	ERB1	RBP	NA	0.788733	-0.0948982	-0.548077	-0.591362	NA	-0.981887	1.13386	0.0622233	-0.297537	NA	NA	-1.08999	0.0156854	0.171994	NA	NA	NA	-1.11863
YPL028W	P41338	ERG10	RBP	F1-F5	0.30787	0.360835	-0.0925315	-0.611926	0.0357536	1.65642	-1.46069	-0.212401	-0.0770078	0.132199	0.187057	1.68209	-1.62322	-0.574125	-0.502335	0.0826074	0.064115	1.46802
YMR208W	P07277	ERG12	NA	NA	-1.77636e-15	NA	NA	NA	NA	0.291491	NA	NA	NA	NA	NA	0.267557	NA	NA	NA	NA	NA	0.133083
YML126C	P54839	ERG13	RBP	F1-F4	0.404965	0.286998	-0.209931	-0.252029	-0.230003	1.61173	-1.3247	-0.415813	-0.235326	-0.372531	-0.159408	1.33347	-1.43062	-0.456818	-0.172761	-0.166873	NA	1.44063
YJL167W	P08524	ERG20	RBP	F1-F4	0.194447	0.0442698	0.0486676	-0.179753	-0.143508	1.3525	-1.4717	-0.603501	-0.306673	-0.130768	0.228059	1.60087	-1.14021	-0.370022	-0.197973	0.272156	NA	1.21314
YML008C	P25087	ERG6	RBP	F1-F4	0.245102	0.0859286	0.0727565	-0.281889	-0.162531	0.272156	-0.550038	0.418484	0.53703	0.359413	NA	0.128549	-0.206265	0.314847	0.488976	0.948717	NA	0.278932
YAR002C-A	Q05359	ERP1	RBP	NA	0.511379	-0.257375	-0.381005	NA	NA	NA	NA	-0.281149	-0.69081	NA	NA	NA	NA	NA	-0.612761	NA	NA	NA
YML067C	Q04651	ERV41	NA	NA	-1.18424e-15	NA	NA	NA	NA	NA	NA	NA	NA	NA	NA	NA	NA	NA	NA	NA	NA	NA
YAL042W	P39727	ERV46	NA	NA	-8.88178e-16	NA	NA	NA	NA	NA	NA	NA	NA	NA	NA	NA	-2.19998	-1.83193	NA	NA	NA	NA
YBR026C	P38071	ETR1	NA	F1-F4	-0.0432231	-0.171363	0.00910043	0.085055	0.12043	-2.46838	0.809264	-0.209717	-0.790558	-0.966181	NA	-2.47549	-0.161863	-0.816625	-0.95341	-1.21727	NA	-2.7501
YLR300W	P23776	EXG1	RBP	NA	0.101233	0.177752	-0.236679	-0.0881542	-0.114799	1.58875	NA	-0.341461	NA	NA	NA	1.10106	-0.647701	-0.712075	NA	NA	NA	0.932905
YOR317W	P30624	FAA1	RBP	NA	0.573978	-0.765304	NA	NA	NA	-0.673643	-0.106605	-0.625697	NA	NA	NA	-0.594765	-0.422206	-0.495032	NA	NA	NA	-0.325213
YMR246W	P47912	FAA4	RBP	NA	-1.77636e-15	NA	NA	NA	NA	0.428645	0.160702	0.56307	NA	0.822491	NA	0.74545	-0.512037	NA	NA	NA	NA	0.6153
YKL182W	P07149	FAS1	RBP	F1-F5	1.17739	0.352967	-0.378641	-0.596598	-0.555114	0.925386	0.410328	0.0950779	0.118245	0.0262318	-0.433255	0.935737	0.151897	-0.035481	-0.224188	-0.235987	-1.02789	0.988235
YPL231W	P19097	FAS2	RBP	F1-F5	1.02323	0.398388	-0.345397	-0.607945	-0.468281	0.81223	0.0814258	-0.15328	0.0665091	0.164835	0.102972	0.772957	-0.224468	-0.147831	-0.230453	-0.00981129	-0.407072	0.623264
YKL060C	P14540	FBA1	RBP	F1-F5	0.800803	0.254372	-0.0842504	-0.33612	-0.634805	1.67967	-0.410611	-0.0962562	-0.607842	-0.438184	0.0552209	1.64391	0.213544	-0.154095	-0.416557	0.098871	0.110678	1.66808
YLR342W;YGR032W	P38631;P40989	FKS1;GSC2	RBP	NA	1.4276	0.876455	-0.226981	-0.596552	-1.48053	-1.0439	1.11904	1.63198	0.928808	-0.402447	NA	-1.04299	0.53984	0.653843	-0.456263	NA	NA	-0.688671
YNL168C	P53889	FMP41	RBP	NA	1.77636e-15	NA	NA	NA	NA	1.45748	NA	NA	NA	NA	NA	0.775409	-0.300366	NA	NA	NA	NA	0.264437
YNL135C	P20081	FPR1	RBP	F1-F5	0.189305	0.424185	0.184101	-0.413243	-0.384348	-0.537017	-1.44244	-0.296549	-0.0592962	-0.365738	-0.0126207	-0.360906	-0.71711	-0.0233572	0.178319	0.362177	0.0874649	-0.551213
YDR519W	P32472	FPR2	NA	NA	0	NA	NA	NA	NA	-0.601446	-1.03505	-0.32995	NA	NA	NA	-0.456521	-0.766174	-0.143094	-0.22834	NA	NA	-0.541391
YML074C	P38911	FPR3	RBP	NA	0.125861	-0.125861	NA	NA	NA	NA	-0.842319	-0.357519	-0.18774	NA	NA	NA	NA	0.210515	0.107558	NA	NA	NA
YEL047C	P32614	FRD1	RBP	NA	0.437749	0.134481	-0.0773632	-0.514208	NA	1.49674	-0.665577	-0.339408	-0.670276	NA	NA	1.07281	-1.07808	-0.373086	-0.26443	NA	NA	0.960288
YLR060W	P15624	FRS1	RBP	F1-F4	0.490952	0.429258	-0.357136	-0.0737298	-0.489344	2.07388	-0.733232	-0.001836	-0.182316	0.201895	NA	2.11129	-0.683069	-0.429199	-0.246451	-0.213038	NA	2.10401
YFL022C	P15625	FRS2	RBP	F1-F4	0.113092	0.393227	0.214018	-0.229977	-0.436856	2.45006	-1.06998	-0.0840479	-0.500344	-0.0763331	NA	2.29324	-1.40823	-1.55178	-1.37417	-0.453138	NA	2.03242
YHR049W	P38777	FSH1	RBP	NA	0.184284	0.22606	-0.0311539	-0.440619	NA	1.33685	-0.431788	-0.158867	-0.360221	NA	NA	1.13057	-0.025949	-0.178413	0.0695243	NA	NA	1.30878
YPL262W	P08417	FUM1	RBP	NA	-0.0274757	0.0442824	-0.262035	-0.0120078	0.188726	0.595114	-0.965309	-0.49436	0.00647283	0.288071	NA	0.752047	-1.56678	-0.770496	-0.415634	NA	NA	0.390292
YAL035W	P39730	FUN12	TF	F1-F4	0.0432327	0.0405443	-0.0653513	0.171771	-0.190197	-1.61882	1.6259	0.0554678	-0.631844	-0.48362	NA	-1.56363	1.32082	-0.299403	-0.86254	-1.15867	NA	-1.44969
YHR128W	P18562	FUR1	RBP	F1-F4	0.955546	0.552716	0.604493	-0.936776	-1.77335	2.24353	-0.777839	-0.0130616	-0.841647	-1.74466	NA	2.38449	-0.524168	-0.15706	-0.855112	-1.08273	NA	2.38355
YMR250W	Q04792	GAD1	NA	NA	-1.77636e-15	NA	NA	NA	NA	0.479429	NA	0.140372	0.447074	0.720934	NA	0.389374	NA	NA	NA	NA	NA	0.60115
YMR307W	P22146	GAS1	RBP	NA	NA	0	NA	NA	NA	NA	NA	NA	NA	NA	NA	NA	NA	NA	NA	NA	NA	NA
YCL011C	P25555	GBP2	RBP	NA	0.159259	0.0337764	-0.0448607	-0.151869	NA	NA	-0.255147	0.408773	0.688441	NA	NA	NA	NA	0.288168	0.409484	NA	NA	NA
YER025W	P32481	GCD11	TF	F1-F5	0.211652	0.42595	0.157047	-0.243245	-0.551403	-1.05246	-0.353111	-0.51154	-0.586356	-0.865886	-1.71537	-1.03422	-0.557111	-0.403918	-0.505553	-0.633135	-2.06979	-0.999178
YDR211W	P32501	GCD6	TF	NA	8.88178e-16	NA	NA	NA	NA	0.330361	0.277027	0.360265	NA	NA	NA	0.324039	-0.155242	0.11775	NA	NA	NA	0.421192
YGL195W	P33892	GCN1	RBP	F1-F4	-0.641545	-0.00975729	0.0994127	0.264841	0.287049	-0.43348	-1.35998	-0.52097	0.0519059	-0.0238632	NA	-0.456256	-1.64425	-0.491283	-0.0211599	-0.281436	NA	-0.253025
YFR009W	P43535	GCN20	RBP	NA	-1.07016	0.107786	0.0103358	0.53036	0.42426	-0.540783	-1.46489	-1.05493	-0.0155653	0.0391979	NA	-0.655797	NA	-0.420705	-0.0123557	0.103008	NA	-0.87955
YDL226C	P35197	GCS1	NA	NA	1.18424e-15	NA	NA	NA	NA	-0.417794	NA	0.247751	NA	NA	NA	-0.323296	NA	NA	NA	NA	NA	-0.200426
YDR019C	P48015	GCV1	NA	NA	8.88178e-16	NA	NA	NA	NA	0.891306	NA	NA	NA	NA	NA	0.6721	-0.449273	NA	NA	NA	NA	0.582795
YMR189W	P49095	GCV2	NA	NA	0.207464	-0.414929	NA	NA	NA	1.81634	-0.618102	NA	NA	NA	NA	1.41384	NA	NA	NA	NA	NA	1.41423
YAL044C	P39726	GCV3	NA	NA	0	NA	NA	NA	NA	0.407158	NA	NA	NA	NA	NA	0.0894361	NA	NA	NA	NA	NA	0.0977651
YEL042W	P32621	GDA1	NA	NA	0.212198	-0.212198	NA	NA	NA	-2.01975	0.775419	-0.338501	-0.227981	NA	NA	-2.08332	0.876513	-0.703223	NA	NA	NA	-1.75827
YOR375C;YAL062W	P07262;P39708	GDH1;GDH3	RBP	F1-F4	0.108212	0.232258	-0.196323	-0.195749	0.0516017	1.36242	-1.30101	-0.381989	0.126554	0.0887445	0.319695	1.42911	-1.52214	-0.530998	-0.246278	-0.15258	NA	1.24285
YER136W	P39958	GDI1	RBP	F1-F4	-0.00950003	0.0240874	0.0250251	-0.0697122	0.0484748	1.61674	-1.29653	-0.529777	0.0560319	0.472521	NA	1.63484	-0.990546	-0.0269611	0.175361	0.430286	NA	1.80415
YDL100C	Q12154	GET3	RBP	NA	0.0312503	0.104337	-0.297581	0.0523834	NA	0.555863	-0.223237	0.42013	0.378041	NA	NA	0.311182	-0.0538384	0.306426	0.606792	NA	NA	0.0384073
YKL104C	P14742	GFA1	RBP	F1-F4	-0.273851	0.104497	-0.197161	0.189697	0.127528	1.13205	-0.645434	0.044143	0.313936	0.721686	NA	1.35866	-1.56049	-0.598886	0.488566	-0.242434	NA	1.32758
YHR108W	P38817	GGA2	RBP	NA	1.77636e-15	NA	NA	NA	NA	-0.00680676	NA	NA	NA	NA	NA	0.507724	NA	NA	NA	NA	NA	NA
YER133W	P32598	GLC7	RBP	NA	0.0707275	-0.0543248	-0.0635273	0.0235487	NA	0.416908	-0.336807	-0.0965528	0.0293311	NA	NA	0.514984	-0.785401	-0.351681	-0.0877798	NA	NA	0.137851
YCL040W	P17709	GLK1	RBP	NA	0.668083	0.206434	0.0800841	-0.849805	-0.169549	2.18791	-0.696313	-0.762839	0.040116	-0.44418	NA	2.63229	-1.39119	-1.54305	-0.427115	NA	NA	2.14544
YPR035W	P32288	GLN1	RBP	F1-F4	0.125983	0.231478	-0.105335	-0.220177	-0.0319493	1.06392	-0.930301	-0.51043	-0.0086916	-0.222678	0.260433	1.17103	-1.15984	-0.249675	0.00520506	-0.0314117	NA	0.448878
YOR168W	P13188	GLN4	RBP	F1-F4	0.222431	0.519793	-0.360309	-0.363741	-0.0181737	2.17303	-0.896233	-0.302266	0.0467978	0.667893	NA	2.0583	-1.28753	-0.569038	-0.267022	-0.229001	NA	1.93723
YPL091W	P41921	GLR1	RBP	NA	0.61911	-0.297802	-0.376237	-0.69159	0.425211	2.11263	-0.512351	-0.303874	0.13096	0.766433	NA	1.99389	-1.21698	-1.01723	NA	NA	NA	2.0584
YDL171C	Q12680	GLT1	RBP	F1-F4	0.597198	0.0463926	-0.390642	-0.264839	0.0118902	1.9797	-0.762216	-0.681862	0.690015	1.4344	-0.377991	2.37107	-1.58297	-1.28435	-0.656656	-0.237951	NA	2.25334
YEL046C	P37303	GLY1	RBP	F1-F4	0.377528	0.187565	0.13882	-0.256834	-0.44708	1.90308	-1.30545	-0.183052	-0.247018	-0.215914	NA	1.86646	-1.76672	-1.05779	-0.331683	-0.583513	NA	1.65577
YHR183W;YGR256W	P38720;P53319	GND1;GND2	RBP	F1-F5	-0.0312954	0.21958	-0.0498284	-0.121141	-0.0173156	1.25084	-0.799939	-0.423835	0.0155598	-0.049248	0.00721821	0.984304	-1.17291	-0.466932	-0.149421	-0.0441178	-0.763793	0.714521
YDL022W	Q00055	GPD1	RBP	F1-F4	0.0432546	0.158037	-0.0718333	0.0441188	-0.173577	0.282188	-0.740694	-0.217792	0.375921	0.536184	NA	0.598823	-0.616263	0.0164332	0.545522	-0.129952	NA	0.436889
YKL152C	P00950	GPM1	RBP	F1-F5	0.86898	0.229699	-0.0729891	-0.348827	-0.676863	1.53433	1.93439	0.785616	-0.657924	-1.04769	-0.591213	1.31158	-0.312243	-0.588406	-0.836147	-0.423224	-0.549744	1.08268
YIL053W	P41277	GPP1	RBP	F1-F4	0.996046	-0.033692	-0.0141821	-0.429277	-0.69186	1.26787	-0.456584	0.0980778	-0.515639	-1.85867	NA	1.11367	-0.0338179	-0.0518219	-0.0475869	-1.28091	NA	0.868641
YBR244W	P38143	GPX2	NA	NA	0	NA	NA	NA	NA	0.913571	0.182575	0.156478	NA	NA	NA	NA	-0.117452	NA	NA	NA	NA	0.524783
YOL151W	Q12068	GRE2	RBP	NA	-1.77636e-15	NA	NA	NA	NA	0.779597	NA	NA	NA	NA	NA	0.820141	NA	NA	NA	NA	NA	0.923281
YHR104W	P38715	GRE3	RBP	NA	0.417506	0.178701	-0.103195	-0.666579	NA	2.20093	-1.02514	-0.683999	-0.629945	NA	NA	2.11894	-1.13368	-0.770959	NA	NA	NA	1.96465
YBR121C;YPR081C	P38088;Q06817	GRS1;GRS2	RBP	F1-F5	-0.0944694	0.180251	-0.100332	-0.0521272	0.0666768	2.04966	-0.8449	-0.344856	0.146276	0.326369	0.590514	2.04091	-0.975322	-0.490584	-0.123273	-0.198201	-0.619138	1.82363
YOL049W	Q08220	GSH2	NA	NA	0.0916833	-0.0592825	-0.0782424	NA	NA	0.805905	NA	NA	NA	NA	NA	0.660156	NA	NA	NA	NA	NA	0.895425
YMR217W	P38625	GUA1	RBP	F1-F5	-0.29613	0.128259	0.0287637	-0.0696961	0.208804	1.10858	-0.666051	-0.180775	0.188176	0.357593	0.366372	1.03201	-1.10158	-0.242782	0.127413	0.139763	0.206514	0.972245
YDR454C	P15454	GUK1	RBP	F1-F4	0.629554	0.486723	0.0843477	-0.83627	-0.686535	1.15677	-0.270735	-0.319396	-0.269442	-0.481577	NA	1.16219	0.67272	-0.174561	-0.0587879	0.422782	NA	0.988661
YGL245W	P46655	GUS1	RBP	F1-F5	-0.276306	0.0961521	0.0265682	-0.0639491	0.217535	1.23894	-0.408399	-0.0835979	0.294115	0.373949	0.191423	1.22306	-0.712601	-0.13434	0.20822	0.3514	-0.408857	1.10222
YIL041W	P40531	GVP36	RBP	F1-F5	0.467514	0.120839	-0.115056	-0.251264	-0.222034	-0.915236	-0.881203	-0.397345	-0.309124	-0.160547	0.134188	-0.949526	-0.553757	-0.0554661	-0.101326	0.0670667	0.56068	-1.07158
YJR069C	P47119	HAM1	RBP	NA	-0.0497861	0.0497861	NA	NA	NA	0.293425	0.0543862	NA	NA	NA	NA	0.751643	-0.26321	NA	NA	NA	NA	0.588155
YMR290C	Q03532	HAS1	RBP	NA	1.11313	0.327507	-0.563188	-0.877443	NA	-2.10355	-0.0960806	-0.0557551	0.10169	-0.16002	NA	-1.93247	0.0591749	0.0729768	0.240392	NA	NA	-1.99341
YKR084C	P32769	HBS1	RBP	NA	1.68889	-2.25185	NA	NA	NA	-2.75943	0.613364	-2.54509	NA	NA	NA	-2.57401	0.713322	NA	NA	NA	NA	-2.44591
YNL281W	P53834	HCH1	NA	NA	0.0157525	-0.0105016	NA	NA	NA	-0.0184249	NA	NA	NA	NA	NA	-0.200739	NA	NA	NA	NA	NA	-0.189849
YLR192C	Q05775	HCR1	RBP	NA	8.88178e-16	NA	NA	NA	NA	-0.406507	-0.184034	NA	NA	NA	NA	-0.80254	-0.23871	NA	NA	NA	NA	-0.881868
YNL014W	P53978	HEF3	TF	NA	0	NA	NA	NA	NA	2.38108	2.43729	0.473657	NA	NA	NA	1.81412	1.53315	NA	NA	NA	NA	1.62508
YBL032W	P38199	HEK2	RBP	F1-F4	-1.23694	0.081812	0.311579	0.291261	0.552287	-1.87145	-0.676372	0.475847	0.755746	0.829989	NA	-1.66767	-0.477845	-0.146819	0.277453	0.736656	NA	-1.38049
YDR266C	Q05580	HEL2	RBP	NA	NA	-1.29191	-0.195504	0.39868	0.442779	NA	NA	-1.01751	0.605814	1.70362	NA	NA	NA	-0.568411	0.73789	0.880409	NA	NA
YDR232W	P09950	HEM1	NA	NA	NA	0	NA	NA	NA	0.491748	NA	NA	NA	NA	NA	0.734697	NA	NA	NA	NA	NA	-0.0275336
YDR044W	P11353	HEM13	RBP	NA	-8.88178e-16	NA	NA	NA	NA	1.29531	NA	NA	NA	NA	NA	1.24589	NA	NA	NA	NA	NA	1.00933
YGL040C	P05373	HEM2	NA	NA	-1.18424e-15	NA	NA	NA	NA	0.570645	-0.821862	NA	NA	NA	NA	0.823071	NA	NA	NA	NA	NA	0.747074
YBR009C	P02309	HHF1	RBP	NA	-0.196878	-0.0619919	0.399682	-0.0751863	NA	-0.430759	NA	-0.105656	0.00464842	0.159446	NA	0.276495	NA	0.277486	0.47653	NA	NA	-0.550232
YER055C	P00498	HIS1	RBP	F1-F4	0.715651	-0.219138	-0.188234	-0.310218	-0.22631	2.47018	-0.524626	-0.23803	-0.410108	0.014455	NA	2.16525	-0.143257	-0.281413	0.271176	-0.24272	NA	2.51157
YCL030C	P00815	HIS4	RBP	F1-F4	-0.128187	0.0840822	0.0137293	-0.0228824	0.0532578	1.89826	-0.830455	-0.32121	0.298251	0.445217	0.623264	1.808	-0.979148	-0.455328	0.0993468	0.37526	NA	1.61043
YIL116W	P07172	HIS5	NA	NA	-0.180749	0.107021	0.110592	NA	NA	1.45484	-0.0445701	NA	NA	NA	NA	1.12883	NA	-0.000317585	NA	NA	NA	1.26702
YBR248C	P33734	HIS7	RBP	NA	0.482071	0.227532	-0.454449	-0.93764	0.313875	1.81233	-1.3665	-0.504939	-0.0943743	0.315071	NA	2.05908	-0.765867	-0.24359	0.0622696	NA	NA	1.64175
YER057C	P40037	HMF1	RBP	NA	0.147505	0.104725	-0.371021	0.104434	NA	0.524174	-1.16694	0.0289957	NA	NA	NA	0.514815	-1.1208	-0.0505769	-0.396313	NA	NA	0.260901
YDR174W	Q03973	HMO1	RBP	NA	-0.103608	NA	0.0288948	0.0819368	NA	NA	-0.209984	0.611423	0.0229621	NA	NA	NA	0.0684027	0.688102	0.782672	NA	NA	NA
YDL125C	Q04344	HNT1	RBP	NA	0.0495757	NA	-0.0991515	NA	NA	0.679304	-0.206193	-0.379206	NA	NA	NA	0.833906	-0.00494088	NA	NA	NA	NA	0.935624
YJR075W	P47124	HOC1	NA	NA	0.496943	-0.265169	NA	-0.596133	NA	NA	-0.405678	-0.228837	0.316762	NA	NA	NA	-0.482103	-0.0151966	NA	NA	NA	NA
YDR158W	P13663	HOM2	RBP	F1-F4	0.27746	0.28771	-0.243637	0.0165966	-0.338129	1.38937	-1.84771	-0.891533	-0.712189	-0.0577777	0.756811	1.153	-1.86118	-0.465031	-0.654374	0.219268	NA	1.43221
YER052C	P10869	HOM3	NA	NA	-1.77636e-15	NA	NA	NA	NA	1.44997	0.0294722	NA	NA	NA	NA	1.54576	-0.720072	NA	NA	NA	NA	1.03098
YJR139C	P31116	HOM6	RBP	F1-F5	0.72003	0.162291	-0.181706	-0.340363	-0.360252	2.15471	-0.366806	-0.195002	-0.121557	-0.75132	0.338303	1.95581	-0.279606	-0.107219	-0.205867	-0.0909456	0.723741	1.92659
YDR399W	Q04178	HPT1	RBP	NA	0.463515	-0.321116	-0.280112	NA	-0.0251887	1.49554	-1.18361	-0.340325	-0.414188	NA	NA	1.70134	-0.817102	-0.419773	NA	NA	NA	1.78144
YLR301W	Q05905	HRI1	RBP	F1-F4	0.555744	0.509168	-0.232182	-0.744026	-0.195665	1.63873	-1.20894	-0.513908	-0.478991	-0.844404	NA	1.54998	-1.05386	-0.401722	-0.171095	-0.12503	NA	1.26373
YMR186W	P15108	HSC82	RBP	F1-F4	0.836349	-0.629561	0.426974	0.243522	-0.77054	2.36713	-0.0419876	0.536686	-0.254279	0.102998	NA	2.37758	0.250932	0.334653	-0.0576846	-0.699379	NA	2.27829
YLL026W	P31539	HSP104	RBP	F1-F4	0.371073	0.373737	0.175629	-0.552269	-0.490895	3.30787	-0.900617	0.12378	1.44558	1.31668	NA	3.20813	-1.00589	0.0461991	0.703073	-0.30256	NA	3.1922
YFL014W	P22943	HSP12	RBP	NA	-0.291687	0.437531	NA	NA	NA	-0.839371	NA	-0.456611	NA	NA	NA	-0.435471	NA	0.105415	NA	NA	NA	-0.483821
YLR259C	P19882	HSP60	RBP	F1-F5	0.214986	0.203408	-0.174981	-0.255405	0.0119918	0.882429	-1.25802	-0.520618	0.0825855	0.377119	0.586152	0.521427	-1.94539	-0.998148	-0.8377	-0.590545	-0.431286	0.484348
YPL240C	P02829	HSP82	RBP	NA	0.765401	-0.217264	-0.465161	-0.259748	-0.117543	2.78929	-0.399882	-0.288057	-0.704526	NA	NA	2.91127	-0.263228	-0.826396	-0.67503	NA	NA	2.70307
YBL002W;YDR224C	P02294;P02293	HTB2;HTB1	NA	F1-F4	-0.0873358	0.153759	0.271854	0.116521	-0.454799	-2.25224	-0.571399	-0.268969	0.230059	0.0937056	NA	-2.53488	-0.860412	0.141848	0.247981	-0.511711	NA	-2.21238
YPR033C	P07263	HTS1	RBP	F1-F4	0.24967	0.0851283	-0.221974	0.0283312	-0.141155	1.44428	-0.267682	-0.282915	-0.0928021	-0.164972	NA	1.32974	-0.832132	-0.0547062	0.0423825	0.384973	NA	1.20499
YFR053C	P04806	HXK1	RBP	F1-F4	0.516349	0.544926	-0.322944	-0.790011	-0.180652	1.78226	-1.30601	-0.571037	-0.404676	-0.759075	NA	1.57949	-1.46521	-0.331061	-0.0268433	-0.751882	NA	1.3403
YGL253W	P04807	HXK2	RBP	F1-F5	0.59381	0.228636	-0.176833	-0.312204	-0.333409	1.933	-0.958537	-0.502869	-0.243803	0.0933212	0.0972357	1.72277	-0.762341	-0.669646	-0.225534	0.142521	-0.203804	1.6942
YEL034W;YJR047C	P23301;P19211	HYP2;ANB1	TF	F1-F4	0.302576	0.0653961	-0.298219	-0.103968	0.034215	-1.01388	2.17699	0.324448	-1.00523	-1.33086	NA	-1.1242	2.49611	0.253526	-0.632456	-0.654861	NA	-0.939684
YIR037W	P40581	HYR1	RBP	NA	1.77636e-15	NA	NA	NA	NA	0.0566885	-0.554523	NA	NA	NA	NA	0.358101	NA	NA	NA	NA	NA	0.0758645
YNL037C	P28834	IDH1	RBP	NA	0.512802	0.15616	0.0746876	-0.522039	-0.368532	1.39132	-1.39825	-0.468878	-0.497827	0.0813473	NA	1.07343	-1.3699	-0.885193	-0.0958696	NA	NA	0.740266
YOR136W	P28241	IDH2	RBP	F1-F4	0.215807	0.400255	-0.0186718	-0.410961	-0.186429	0.869664	-1.61433	-0.714486	-0.0917967	-0.0803506	NA	0.480382	-1.8339	-0.818779	-0.483154	-0.115397	NA	0.0794388
YPL117C	P15496	IDI1	NA	NA	0.384613	-0.39621	NA	0.0231944	NA	-0.497507	-1.28766	-0.0859507	NA	NA	NA	-0.107457	-1.2524	0.0178432	-1.19654	NA	NA	-1.11735
YDL066W	P21954	IDP1	RBP	NA	0.919534	-0.0508632	0.319171	-0.321443	-1.04881	1.91249	1.03495	0.497087	-0.766252	-1.42926	NA	1.68419	-0.471956	-0.0560339	-0.321936	NA	NA	1.44134
YLR384C	Q06706	IKI3	RBP	NA	0.133654	-0.164164	NA	-0.0105309	NA	0.241119	0.954386	0.354755	0.800622	0.908783	NA	0.494479	-0.251847	0.03348	NA	NA	NA	0.101982
YBL076C	P09436	ILS1	RBP	F1-F4	-0.0895936	0.111719	-0.117222	-0.0645062	0.159603	1.6345	-0.785639	-0.466776	0.16391	0.22125	-0.209578	1.548	-1.1694	-0.541806	-0.032571	0.13151	NA	1.47954
YER086W	P00927	ILV1	RBP	NA	0.292041	-0.0943985	0.135339	-0.118986	-0.240214	1.10369	-1.09524	-0.0592205	0.331372	0.602885	NA	1.02006	-1.32285	-0.515742	0.0348071	NA	NA	0.892129
YMR108W	P07342	ILV2	RBP	F1-F4	0.236957	0.102504	-0.0819033	-0.42009	0.162532	0.776836	-1.71217	-0.661983	-0.165	0.397767	NA	0.480021	-1.8602	-1.28288	-0.830712	-0.620869	NA	0.535088
YJR016C	P39522	ILV3	RBP	F1-F4	0.395894	0.129772	-0.34662	-0.206434	-0.0592677	1.80827	-1.54054	-0.671059	-0.220674	-0.0394463	NA	1.47828	-2.03691	-1.45967	-0.474337	-0.276591	NA	1.30266
YLR355C	P06168	ILV5	RBP	F1-F5	0.475118	0.339954	-0.241834	-0.333151	-0.240087	1.2593	-1.41432	-0.526517	-0.471208	-0.605519	-0.457805	1.181	-1.45849	-0.715091	-0.612941	-0.407152	-0.550213	1.00093
YCL009C	P25605	ILV6	RBP	NA	0.228336	0.0133766	-0.105146	-0.212679	NA	1.1784	NA	-0.244646	-0.00691525	NA	NA	1.38334	NA	-0.495406	NA	NA	NA	1.32607
YHR216W;YAR073W	P38697;P39567	IMD2;IMD1	RBP	F1-F4	-0.745523	0.214014	0.0114625	0.350588	0.301104	-1.13978	-0.246011	1.21261	1.90635	1.54343	NA	-1.62036	-1.18598	0.131967	-0.228124	0.0547068	NA	-1.21819
YLR432W;YAR075W	P50095;O42831	IMD3;YAR075W	RBP	F1-F5	0.0344943	-0.1005	-0.0152814	0.261198	-0.179911	-1.05203	0.224349	1.27444	1.2297	0.865111	-0.319884	-1.09027	-1.57715	-0.505979	-0.553338	-1.00807	-1.49561	-1.41719
YML056C	P50094	IMD4	RBP	F1-F5	-0.73153	0.348758	0.119665	0.28326	-0.0201531	-2.44408	-0.852878	0.662731	1.18659	0.968147	0.121616	-2.56211	-2.36768	-0.639108	-0.639043	-0.491646	-1.59126	-2.48153
YHR085W	P38803	IPI1	NA	NA	1.18424e-15	NA	NA	NA	NA	NA	0.393063	NA	NA	NA	NA	NA	0.450146	NA	NA	NA	NA	NA
YNL182C	P53877	IPI3	NA	NA	0.833299	-0.6432	NA	-0.701797	NA	-1.25747	-0.350531	-0.452088	NA	NA	NA	-1.15973	-0.348647	-0.431669	NA	NA	NA	-1.35349
YBR011C	P00817	IPP1	RBP	F1-F4	0.588489	0.273734	-0.0867501	-0.345088	-0.430385	1.25624	-0.538646	-0.201673	-0.506318	-1.1604	NA	1.15758	-0.276528	-0.213578	-0.311775	-0.413064	NA	0.700673
YIR036C	P40580	IRC24	NA	NA	8.88178e-16	NA	NA	NA	NA	0.684786	NA	NA	NA	NA	NA	0.73017	NA	NA	NA	NA	NA	0.761435
YER110C	P40069	KAP123	RBP	F1-F4	-0.113069	0.166184	0.144658	-0.101825	-0.0959475	1.60651	-0.991205	-0.377328	-0.177407	0.0647826	-0.214888	1.59825	-1.18292	-0.4167	-0.241704	-0.349414	NA	1.41503
YJL034W	P16474	KAR2	RBP	F1-F4	-0.153123	0.0096095	0.0501041	-0.198949	0.292358	0.547069	-0.319468	0.371127	0.903491	0.841231	NA	0.780336	0.12732	0.783873	0.742704	0.831992	NA	0.350752
YPL263C	Q08979	KEL3	NA	NA	0.185087	-0.0273804	-0.144017	NA	NA	-0.156597	0.773528	NA	NA	NA	NA	-0.053031	-0.0660236	NA	NA	NA	NA	-0.0626512
YPL145C	P35844	KES1	RBP	NA	-0.0910955	-0.0587636	0.126691	-0.0466948	0.162046	1.6841	-0.985037	-0.194897	0.527091	0.48815	NA	1.41735	-0.738829	-0.480474	-0.104619	NA	NA	1.24057
YIL125W	P20967	KGD1	RBP	NA	1.49783	0.266829	-1.25951	-1.13491	NA	-1.5017	0.183927	-0.303185	-0.548651	0.0811132	NA	-1.63432	-1.23386	-1.21623	NA	NA	NA	-1.76343
YDR148C	P19262	KGD2	NA	NA	1.12848	0.198041	-0.726834	-0.915475	-0.647313	-1.99284	0.232294	-0.198879	-0.0323429	-0.453427	NA	NA	-1.47305	-1.02453	-0.720306	NA	NA	NA
YDR483W	P27809	KRE2	NA	NA	0.355432	-0.31649	-0.236128	NA	NA	-2.06514	-0.565658	-0.430708	NA	NA	NA	-2.35328	-0.626753	-0.809666	NA	NA	NA	-2.31852
YNL132W	P53914	KRE33	RBP	F1-F4	0.106503	0.0596915	-0.0768065	-0.170389	NA	-0.683173	0.269577	0.387491	0.507306	0.56268	NA	-1.26541	-0.180268	0.564512	0.549746	0.297261	NA	-0.990158
YPR159W;YGR143W	P32486;P33336	KRE6;SKN1	NA	NA	0.0525713	0.098526	-0.201463	NA	NA	-1.00992	-0.383985	0.125842	0.0444532	NA	NA	NA	-0.705247	-0.299456	NA	NA	NA	NA
YDR037W	P15180	KRS1	RBP	F1-F4	0.138468	-0.0058039	-0.15119	-0.209318	0.227844	1.49423	-0.547472	-0.232625	0.146191	0.0499769	0.206232	1.52742	-0.852125	-0.615643	-0.135475	-0.0273753	NA	1.63093
YOR099W	P27810	KTR1	RBP	NA	0.96378	0.48029	-0.17325	-1.27082	NA	-2.33761	-0.778919	0.0791468	-0.35581	-0.194241	NA	-2.46605	-1.05693	0.0531381	-0.798357	NA	NA	-1.99
YBR205W	P38130	KTR3	NA	NA	1.15398	-0.0173665	-0.688293	-1.24948	NA	-2.1643	-0.392536	0.184075	0.237684	NA	NA	-2.31223	-0.670366	0.118415	-0.131729	NA	NA	-2.01218
YNL045W	Q10740	LAP2	NA	NA	1.77636e-15	NA	NA	NA	NA	0.837079	NA	NA	NA	NA	NA	1.14984	NA	NA	NA	NA	NA	0.810726
YNL239W	Q01532	LAP3	RBP	NA	-0.0280493	-0.0170845	0.0516978	-0.155586	0.159765	1.08561	NA	-0.217002	0.0457286	0.680845	NA	1.16146	NA	-0.304895	0.0255134	NA	NA	0.32165
YNL071W	P12695	LAT1	RBP	NA	3.11887	1.10513	-0.630001	-1.51528	-2.07872	-2.49886	1.23033	0.566375	-0.847513	-1.50457	NA	-3.0742	0.117828	-1.11871	-2.28131	NA	NA	-3.59741
YGL009C	P07264	LEU1	RBP	F1-F4	0.628436	-0.0869211	-0.176751	0.154128	-0.56308	3.2708	0.481639	0.222722	-0.210333	-0.278234	NA	3.15875	-0.492478	-0.507518	-0.87366	-0.110244	NA	3.18408
YNL104C	P06208	LEU4	RBP	NA	0.267665	0.35454	-0.0392252	-0.245937	-0.462466	2.30307	-1.69149	-0.797969	-0.300724	-0.0853677	NA	2.31008	-1.84743	-0.901235	-0.803468	NA	NA	2.28526
YDL051W	P33399	LHP1	RBP	NA	0.207931	0.0448078	NA	-0.369886	0.0493507	-0.0807176	-0.0722188	-0.184747	0.254085	NA	NA	-0.445942	-1.16847	NA	0.330233	NA	NA	-0.770858
YJR070C	P47120	LIA1	RBP	NA	0.0984855	0.133734	-0.149272	-0.353292	0.360459	0.340398	-1.44416	-0.817687	-0.434901	NA	NA	1.32199	-1.21482	-0.0691802	-0.0666328	0.108602	NA	0.714613
YFL018C	P09624	LPD1	RBP	NA	3.25454	1.06327	-1.18586	-2.73083	-2.16767	-1.40694	0.942977	0.125416	-1.41809	NA	NA	-2.06726	-0.845898	-2.16869	NA	NA	NA	-2.52695
YOR142W	P53598	LSC1	RBP	NA	0.155622	0.15315	-0.161215	-0.147557	NA	0.139446	NA	NA	-0.0209332	NA	NA	0.421409	NA	NA	-0.18447	NA	NA	-0.264613
YGL099W	P53145	LSG1	RBP	NA	1.54833	-0.145822	-1.04913	-0.247213	-0.212339	-1.22442	1.0727	-0.007094	-0.303526	-0.276279	NA	-1.33378	0.441206	-0.468473	-0.745958	NA	NA	-0.977687
YJL124C	P47017	LSM1	RBP	NA	-0.734888	NA	0.734888	NA	NA	NA	NA	NA	NA	NA	NA	NA	NA	NA	NA	NA	NA	NA
YHR121W	P38828	LSM12	RBP	F1-F4	-1.46295	0.173744	0.333943	0.497332	0.610569	-1.98458	-1.34129	0.242691	0.195479	0.348191	NA	-2.0155	-1.41775	-0.323519	0.243666	-0.0284357	NA	-1.69281
YBL026W	P38203	LSM2	RBP	NA	NA	0	NA	NA	NA	NA	NA	NA	NA	NA	NA	NA	NA	NA	NA	NA	NA	NA
YER112W	P40070	LSM4	RBP	NA	-0.578112	0.299103	0.0696769	0.134853	0.0918978	-1.42635	-0.380657	-0.125308	-0.184501	NA	NA	NA	-0.157322	0.188262	0.0640831	NA	NA	NA
YER146W	P40089	LSM5	RBP	NA	NA	-1.77636e-15	NA	NA	NA	NA	NA	NA	NA	NA	NA	NA	NA	NA	NA	NA	NA	NA
YGR169C-A	Q3E772	LSO2	RBP	NA	-1.77636e-15	NA	NA	NA	NA	NA	NA	NA	NA	NA	NA	NA	0.221422	NA	NA	NA	NA	NA
YPL004C	Q12230	LSP1	RBP	NA	-0.310236	NA	NA	0.310236	NA	-0.032593	NA	NA	NA	NA	NA	-0.278667	NA	-0.103883	NA	NA	NA	-0.319447
YIL094C	P40495	LYS12	RBP	NA	0.217784	0.123967	-0.221562	-0.257691	-0.00670966	0.585288	-0.386756	-0.304341	0.171455	NA	NA	0.447562	-0.929928	-0.325147	NA	NA	NA	0.838053
YBR115C	P07702	LYS2	NA	NA	-0.401394	-0.4271	NA	1.44344	NA	2.8278	-1.23371	2.42828	0.817359	0.486731	NA	3.27557	NA	0.954216	NA	NA	NA	3.19793
YDR234W	P49367	LYS4	NA	NA	0	NA	NA	NA	NA	0.573023	NA	NA	NA	NA	NA	0.903622	NA	NA	NA	NA	NA	0.358725
YNR050C	P38999	LYS9	NA	NA	0.0933748	-0.0351658	0.277242	-0.549865	NA	1.85484	-0.862017	-0.268943	0.264117	NA	NA	1.81413	-1.10328	NA	0.519992	NA	NA	1.6096
YKL029C	P36013	MAE1	RBP	NA	0.935439	0.298307	-0.259645	-0.662338	-0.502233	1.37735	-0.0113694	-0.197769	-0.430865	0.161735	NA	0.97424	-0.463954	-0.694401	-0.0938135	NA	NA	0.654303
YLR244C	Q01662	MAP1	RBP	F1-F4	0.30006	0.272281	-0.281918	-0.160914	-0.12951	-2.20027	0.807208	-0.736012	-0.744859	-0.798554	NA	-2.36508	0.684594	-0.55355	-0.413119	-0.766614	NA	-2.27449
YBL091C	P38174	MAP2	RBP	NA	0.895751	0.874164	0.103243	-0.313341	-1.55982	-2.22576	1.49075	0.0786232	-1.86239	-1.81634	NA	-2.08798	0.577174	-0.921826	-2.05249	NA	NA	-2.01119
YOR298C-A	O14467	MBF1	RBP	F1-F5	-0.944715	0.550426	0.00817476	0.166834	0.21928	-4.92683	-2.51348	-1.50162	-0.311236	-0.268845	-0.711882	-5.21022	-1.5044	-0.0710731	-0.0329229	-0.0607378	0.532971	-4.84542
YNL307C	P21965	MCK1	RBP	NA	-0.343652	0.158153	-0.152535	0.130917	0.2617	0.635579	-0.19021	-0.199892	0.118706	NA	NA	0.747536	-0.366015	-0.171892	-0.0127709	NA	NA	0.41485
YKL085W	P17505	MDH1	RBP	NA	0.193592	0.060318	-0.477662	NA	NA	0.0981453	NA	NA	NA	NA	NA	-0.042054	NA	0.0013544	NA	NA	NA	-0.0397536
YDL078C	P32419	MDH3	RBP	NA	0.577738	-0.770317	NA	NA	NA	-1.77729	-0.31412	-1.10977	-0.891799	NA	NA	-1.67351	-1.21994	-0.926952	-0.920578	NA	NA	-2.16699
YOL076W	Q12387	MDM20	RBP	NA	0.0628949	-0.12579	NA	NA	NA	0.0586414	NA	0.077614	NA	NA	NA	-0.111989	NA	NA	0.324615	NA	NA	0.0255206
YLR106C	Q12019	MDN1	RBP	NA	0.0339617	-0.0452823	NA	NA	NA	0.365408	-0.0709276	0.351644	NA	NA	NA	0.540619	-0.304126	NA	NA	NA	NA	0.864068
YGR264C	P00958	MES1	RBP	F1-F4	-0.00285527	0.185196	-0.0748903	-0.135772	0.0283215	1.34639	-0.274198	-0.0462214	0.38886	0.747662	NA	1.36183	-0.505055	-0.179469	0.181076	0.391377	NA	1.22732
YER091C	P05694	MET6	RBP	F1-F5	0.13306	0.184286	0.0223052	-0.190722	-0.148929	1.88644	-1.08067	-0.405808	-0.0174203	0.110662	0.466187	1.76105	-1.21661	-0.533706	-0.278517	0.247841	0.235361	1.77292
YOR241W	Q08645	MET7	NA	NA	-0.25872	0.25872	NA	NA	NA	0.439056	NA	NA	NA	NA	NA	0.308176	-0.187177	NA	NA	NA	NA	0.267081
YLR017W	Q07938	MEU1	RBP	NA	0	NA	NA	NA	NA	0.185407	-0.670361	-0.128862	-0.305684	NA	NA	0.309084	NA	NA	NA	NA	NA	0.257735
YBR084W	P09440	MIS1	RBP	F1-F5	-1.93788	-0.482029	0.523418	1.01168	0.884819	-2.42612	-0.507835	0.233731	0.307476	0.372367	-0.425113	-2.42492	-0.985489	-0.218795	0.355194	0.539173	-1.1688	-2.57077
YNL085W	P40850	MKT1	RBP	NA	NA	NA	NA	-0.216721	0.216721	-0.244668	NA	-0.880159	-0.355706	-0.321664	NA	-0.848222	NA	NA	-0.706175	NA	NA	NA
YIL051C	P40185	MMF1	RBP	F1-F4	0.32414	0.587306	0.0536001	-0.549109	-0.415936	0.780361	-1.46951	-0.406328	-0.32957	-0.26054	0.755072	0.576683	-1.29445	-0.15398	-0.232628	-0.0764301	NA	0.422993
YER001W	P39106	MNN1	NA	NA	-0.146923	0.146923	NA	NA	NA	NA	-0.0125798	0.319014	NA	NA	NA	NA	0.0589666	0.106621	NA	NA	NA	NA
YJL183W	P46985	MNN11	RBP	NA	1.00195	-0.190027	-0.718457	-1.00041	NA	-1.77325	0.292693	0.677116	0.201653	NA	NA	-2.19548	0.279416	0.10645	-0.618093	NA	NA	-1.72722
YBR015C	P38069	MNN2	NA	NA	1.18424e-15	NA	NA	NA	NA	NA	NA	NA	NA	NA	NA	NA	NA	NA	NA	NA	NA	NA
YJL186W	P46982	MNN5	NA	NA	0.758064	0.598089	-0.63108	-0.966764	NA	-2.08146	-0.565473	-0.0403942	0.0188189	-0.270361	NA	-1.93499	-0.419797	0.113307	-0.232506	NA	NA	-1.64868
YPL050C	P39107	MNN9	RBP	NA	0.871705	0.266296	-0.246228	-1.18903	NA	NA	-0.284062	0.333058	0.0178557	NA	NA	-2.545	-0.248329	0.257008	-0.0460487	NA	NA	NA
YPR118W	Q06489	MRI1	RBP	NA	0.074688	-0.099584	NA	NA	NA	1.58987	-0.770844	-0.598303	NA	NA	NA	1.49306	-0.541642	-0.189551	0.538656	NA	NA	1.44778
YPL184C	Q08925	MRN1	RBP	NA	-0.620697	-0.0680236	NA	0.0614783	0.629424	-0.58156	-1.01809	-0.0782757	1.26327	1.32628	NA	-0.37858	-0.736931	0.167515	NA	NA	NA	-0.383054
YKL009W	P33201	MRT4	RBP	F1-F4	1.52246	-0.0273629	-0.164984	-1.14075	-0.37871	-1.7757	2.08681	0.328812	-0.664064	-0.48217	NA	-2.18269	2.4127	0.334685	0.0658624	-0.569066	NA	-1.43579
YJL123C	P47018	MTC1	RBP	NA	0.43767	-0.43767	NA	NA	NA	-0.184659	NA	-0.609106	-0.312396	NA	NA	-0.0843225	-0.815206	NA	NA	NA	NA	-0.127042
YKR080W	Q02046	MTD1	RBP	NA	1.18424e-15	NA	NA	NA	NA	0.940599	-0.549771	-0.415616	NA	NA	NA	0.681843	-0.490443	NA	NA	NA	NA	0.638509
YNR043W	P32377	MVD1	RBP	F1-F4	0.465711	0.407429	0.24652	-0.485502	-0.634158	1.66002	-1.5714	-0.525511	-0.373491	-0.321354	NA	1.46345	-1.31833	-0.574283	-0.383511	-0.290044	NA	1.40702
YOR326W;YAL029C	P19524;P32492	MYO2;MYO4	RBP	NA	-0.214831	-0.0431577	-0.105231	0.54483	NA	0.348265	0.0307978	0.1014	0.0745959	NA	NA	0.174233	-0.183552	-0.0749343	0.405021	NA	NA	0.372476
YPL126W	Q02931	NAN1	RBP	NA	0.087995	0.0869678	NA	-0.306442	NA	-0.616995	0.151254	0.549537	0.837451	0.590941	NA	-0.65707	-0.109412	0.825818	0.704927	NA	NA	-0.544654
YKR048C	P25293	NAP1	RBP	NA	-0.0834713	0.0538645	0.0952186	-0.00907269	NA	0.86989	-0.139311	0.246645	0.0362219	NA	NA	0.77821	-0.397046	-0.213168	0.329892	NA	NA	0.998288
YDL040C	P12945	NAT1	RBP	F1-F4	-1.03356	-0.257187	0.214439	0.625122	0.451186	-2.57824	0.0749093	-0.393673	0.193742	-0.0272992	-1.21741	-2.71123	-0.437811	-0.325815	0.0223387	-0.084972	NA	-2.84091
YOR253W	Q08689	NAT5	NA	NA	-0.714895	-0.567335	0.174912	0.794984	0.341	-1.81838	0.203596	-0.540112	0.343215	NA	NA	NA	0.058459	0.250922	NA	NA	NA	NA
YBL024W	P38205	NCL1	RBP	NA	0.103481	0.388322	-0.268517	-0.212809	-0.0209523	0.719602	0.180301	-0.404015	-0.16959	-0.370538	NA	0.62328	0.0913848	-0.533165	-0.172251	NA	NA	0.640637
YHR042W	P16603	NCP1	RBP	NA	-0.390078	0.0230571	0.0815172	0.332027	NA	-1.05406	-0.282301	0.52727	1.27123	2.41506	NA	-0.812539	0.170376	1.14949	0.954358	NA	NA	-0.484903
YPL226W	Q08972	NEW1	RBP	F1-F4	-0.736653	0.157861	0.0789236	0.168963	0.330906	-1.95699	-0.654252	-0.801061	-0.489493	-0.327855	NA	-1.99427	-0.842113	-0.746122	-0.47659	-0.383726	NA	-1.94707
YPR052C	P11632	NHP6a	RBP	NA	-0.0252865	0.0252865	NA	NA	NA	NA	-0.599071	NA	NA	NA	NA	NA	-0.0246049	-0.0252447	NA	NA	NA	NA
YGL221C	P53081	NIF3	NA	NA	-0.118874	0.120267	0.0215	-0.317541	0.441275	1.4935	-0.78913	-0.362078	0.150584	0.313961	NA	1.65119	-0.725446	-0.476795	0.0309959	NA	NA	1.64909
YMR309C	P32497	NIP1	TF	F1-F4	-0.659668	0.460074	0.21886	0.0804718	-0.0997375	-1.40048	-0.951291	-0.852151	-0.551	-0.541404	-1.15444	-1.6913	-1.45776	-0.726059	-0.63167	-0.721064	NA	-1.59879
YPL211W	Q08962	NIP7	RBP	NA	8.88178e-16	NA	NA	NA	NA	NA	NA	-0.659584	NA	NA	NA	NA	-1.10274	NA	NA	NA	NA	NA
YLR351C	P49954	NIT3	NA	NA	-0.144589	0.148595	NA	0.140583	NA	0.54932	NA	-0.392105	NA	NA	NA	0.247694	NA	NA	NA	NA	NA	0.387559
YNL123W	P53920	NMA111	NA	NA	0	NA	NA	NA	NA	1.64482	NA	NA	NA	NA	NA	1.5234	NA	NA	NA	NA	NA	1.56272
YHR170W	P38861	NMD3	RBP	F1-F4	1.85532	0.185854	-0.491331	-0.884003	-0.665843	-0.425735	1.10437	0.371715	-0.392104	-0.438922	NA	-0.578562	0.374197	-0.114473	-0.768	-0.455931	NA	-0.145847
YPL093W	Q02892	NOG1	RBP	NA	0.889265	-0.519958	-0.652908	-0.191858	0.50604	-2.17542	-0.315661	-0.32615	-0.281036	-0.0568509	NA	-2.40468	-0.482028	-0.299193	0.138296	NA	NA	-2.27192
YNR053C	P53742	NOG2	RBP	NA	1.44708	-1.05301	NA	-0.788145	NA	-2.18343	-0.0165106	-1.41155	NA	NA	NA	-2.2966	-0.651439	-1.34703	NA	NA	NA	-2.21491
YDL014W	P15646	NOP1	RBP	NA	0.0662913	-0.132583	NA	NA	NA	-1.13965	1.73516	0.605627	0.900096	NA	NA	-1.47692	2.21596	1.14972	0.502737	NA	NA	-0.168799
YNL061W	P40991	NOP2	RBP	NA	0.162876	-0.325752	NA	NA	NA	-1.65322	-0.962017	-0.799519	NA	NA	NA	NA	-0.796331	-0.804565	NA	NA	NA	NA
YLR197W	Q12460	NOP56	RBP	NA	0.739281	-0.124321	-0.317823	-0.15041	-0.673438	-0.711577	1.26181	1.35168	0.946074	0.702029	NA	-1.00124	1.27136	1.34396	0.933368	NA	NA	-0.527792
YOR310C	Q12499	NOP58	RBP	NA	1.77636e-15	NA	NA	NA	NA	NA	0.483843	0.530546	1.02324	NA	NA	NA	0.494535	0.942888	1.0134	NA	NA	0.395651
YDL213C	Q07623	NOP6	RBP	NA	0	NA	NA	NA	NA	NA	NA	NA	NA	NA	NA	NA	NA	NA	NA	NA	NA	NA
YGR103W	P53261	NOP7	RBP	NA	0.215622	-0.287496	NA	NA	NA	-1.26525	0.515964	-0.563256	-0.750936	NA	NA	-1.51695	0.127118	-0.645999	NA	NA	NA	-1.39336
YDR432W	Q01560	NPL3	RBP	F1-F4	0.2864	0.386965	-0.159183	-0.172653	-0.341529	-1.17161	-0.529199	0.00255591	0.414467	0.281405	NA	-1.37319	-0.696788	-0.0960228	0.182386	0.10653	NA	-1.35173
YOR209C	P39683	NPT1	RBP	NA	0.320118	-0.203419	0.168332	-0.18817	-0.0730373	1.19203	-0.594552	-0.443742	-0.313831	-0.172441	NA	1.16292	-0.804382	-0.0228667	0.105028	NA	NA	1.05927
YGL111W	P53136	NSA1	NA	NA	0.143196	-0.286391	NA	NA	NA	-0.840157	-0.492668	NA	NA	NA	NA	-0.721744	NA	NA	NA	NA	NA	-0.716198
YER126C	P40078	NSA2	RBP	NA	1.77636e-15	NA	NA	NA	NA	NA	-0.498236	NA	NA	NA	NA	NA	NA	NA	NA	NA	NA	NA
YGR159C	P27476	NSR1	RBP	NA	0.216576	0.156983	-0.0347181	-0.0626698	-0.261272	-0.505614	-0.157071	0.36135	0.15532	NA	NA	-0.725526	-0.302588	0.260154	0.448388	0.59337	NA	-0.482553
YER009W	P33331	NTF2	RBP	NA	0.138713	0.408047	0.114659	-0.321291	-0.522382	-0.119854	-0.621691	-0.422399	-0.0881358	-0.693894	NA	-0.208716	-0.714135	-0.354394	-0.244088	NA	NA	0.141017
YER006W	P40010	NUG1	RBP	NA	1.03881	0.215246	-0.403682	-0.53829	-0.31208	-1.68524	1.137	0.500788	-0.0202259	-0.124915	NA	-1.58207	0.46319	-0.0346279	-0.402857	NA	NA	-1.35956
YBR025C	P38219	OLA1	RBP	F1-F5	-0.22612	-0.0592083	-0.0741357	0.142555	0.21691	-0.784371	-1.29661	-0.358327	-0.281677	-0.700438	1.65041	-0.840705	-0.891856	-0.0442951	0.0264891	-0.0903856	4.01073	-0.747431
YHR179W;YPL171C	Q03558;P41816	OYE2;OYE3	RBP	NA	0.813319	0.265609	0.0588532	-0.981973	-0.515451	3.11595	-0.898727	-0.739029	-0.654349	-1.48958	NA	2.97837	0.00885164	-0.951629	-1.62005	NA	NA	2.79746
YDR071C	Q12447	PAA1	RBP	NA	0.119001	-0.0779779	0.607234	-0.216644	-0.294981	1.46819	-0.869788	-0.400657	0.126295	-0.00354526	NA	1.61241	-0.701044	0.0634404	0.490948	NA	NA	1.58643
YER165W	P04147	PAB1	TF	F1-F5	-0.972327	0.564633	0.397366	0.217099	-0.206772	-2.76865	-1.48614	-0.0768994	0.27143	0.163327	-0.56966	-2.6713	-1.12018	0.192195	0.149818	-0.068994	-1.19625	-2.59007
YHR063C	P38787	PAN5	NA	NA	0.0504183	0.0637415	-0.130966	NA	NA	0.989251	-0.554855	-0.355258	0.0026974	0.398755	NA	0.98137	NA	NA	NA	NA	NA	0.855493
YCR077C	P25644	PAT1	RBP	NA	-0.953287	0.503579	0.215752	0.188663	0.0992313	NA	NA	-0.219189	-0.0455654	NA	NA	NA	-1.16674	-0.0596036	0.0450702	0.108469	NA	NA
YGR178C	P53297	PBP1	RBP	NA	-0.889728	-0.1252	-0.0042916	0.52466	0.477363	-1.66882	-0.686102	-0.250938	1.02995	0.270682	NA	NA	NA	-0.114422	-0.112399	NA	NA	NA
YDL053C	Q07362	PBP4	RBP	NA	-1.89518	-0.253248	0.104934	1.0446	1.67743	NA	-1.15311	-0.319365	1.01075	0.964637	NA	NA	NA	-0.160559	-0.27089	0.789071	NA	NA
YER178W	P16387	PDA1	RBP	NA	2.86732	0.971334	-0.831916	-1.264	-1.74274	-1.46422	1.15641	0.535735	-0.703069	-1.7208	NA	-1.80229	0.0479841	-1.21888	-3.01476	NA	NA	-2.58619
YBR221C	P32473	PDB1	RBP	F1-F4	3.19906	0.856293	-0.392464	-1.60644	-2.05645	-1.77272	1.35441	0.893168	-0.814908	-2.14302	-1.80138	-2.03949	0.161525	-1.08395	-2.87411	-3.76946	NA	-2.68235
YLR044C;YLR134W	P06169;P16467	PDC1;PDC5	RBP	F1-F5	0.575556	0.0434948	-0.223605	-0.0941924	-0.301253	1.91676	-0.624157	-0.112316	-0.280454	-0.186786	-0.345391	2.09365	-0.801809	-0.207936	-0.284718	-0.786828	-0.66859	1.95088
YCL043C	P17967	PDI1	RBP	F1-F4	0.138741	0.180709	0.157192	-0.31862	-0.264506	2.39525	0.218084	0.800365	0.9141	0.91109	NA	2.72929	0.717194	0.619959	0.894364	1.32294	NA	2.63882
YGR193C	P16451	PDX1	NA	NA	0.885579	-1.18077	NA	NA	NA	NA	-0.715088	-0.820265	NA	NA	NA	NA	-2.13422	NA	NA	NA	NA	NA
YBR035C	P38075	PDX3	RBP	NA	0.0344952	0.122775	-0.0291708	-0.139598	NA	1.06903	-0.558211	-0.534802	-0.0534481	NA	NA	0.950404	-0.676443	-0.172044	NA	NA	NA	0.715635
YPL154C	P07267	PEP4	RBP	NA	0.373196	-0.0576497	0.000581045	-0.146989	-0.244735	-0.265925	0.321761	0.57598	0.0838808	0.337547	NA	-0.163847	0.655022	0.219733	0.235819	NA	NA	-0.153327
YGR240C	P16861	PFK1	RBP	F1-F5	0.310782	0.11524	-0.253568	-0.171616	-0.00083826	1.88802	-0.349558	-0.158771	0.189947	0.268078	0.284267	1.66243	-0.640047	-0.357398	-0.232226	-0.0352736	-0.419988	1.51601
YMR205C	P16862	PFK2	RBP	F1-F5	0.109061	0.179279	-0.117618	-0.177321	0.00659927	1.67587	-0.589096	-0.257588	0.251767	0.420125	0.630763	1.31788	-1.08037	-0.415938	-0.294904	0.0394947	0.348835	1.33257
YOR122C	P07274	PFY1	NA	F1-F4	0.487282	0.247906	-0.0603069	-0.714415	-0.308295	0.653835	-0.996544	-0.230754	-0.303532	-0.380929	NA	0.982681	-0.317153	-0.0548001	0.223367	-0.161723	NA	1.12306
YBR196C	P12709	PGI1	RBP	F1-F5	0.349204	0.112159	-0.0833113	-0.129128	-0.248923	2.10956	-1.10549	-0.426017	-0.378874	-0.24209	-0.304272	1.84521	-1.19981	-0.464208	-0.441393	-0.161597	-0.955175	1.58664
YCR012W	P00560	PGK1	RBP	F1-F5	0.542439	0.312192	-0.094274	-0.366222	-0.394135	0.944159	-0.760173	-0.28612	-0.220841	-0.37254	-0.164869	0.640493	-0.468587	-0.0768411	-0.056566	-0.0751535	-0.181376	0.755427
YKL127W	P33401	PGM1	RBP	NA	-0.151543	0.252451	0.0364274	-0.0797772	NA	1.65677	-0.946137	-0.771911	0.29444	-0.0070657	NA	1.34577	NA	-0.219775	0.319805	NA	NA	1.64175
YMR105C	P37012	PGM2	RBP	NA	-0.329063	0.463284	-0.0675422	NA	0.0645132	1.01396	-0.41578	-0.14996	0.215064	NA	NA	1.06774	-0.730071	NA	0.0140323	NA	NA	0.933214
YDL236W	P19881	PHO13	NA	NA	-0.0160757	0.167404	-0.145165	-0.07379	NA	1.14057	-0.814077	0.0773933	NA	NA	NA	0.614202	-0.999466	NA	NA	NA	NA	0.798081
YBR106W	P38264	PHO88	NA	F1-F4	-0.801671	0.133262	0.328978	0.439876	-0.0242676	-1.20482	-1.25242	1.0098	1.41396	1.55697	NA	-1.64038	-0.434557	1.74129	1.83297	1.05313	NA	-1.62379
YGR086C	P53252	PIL1	RBP	F1-F4	0.025676	0.0762948	-0.0646212	0.0420246	-0.158748	0.857667	-0.633587	0.0920011	-0.0820706	0.384637	NA	0.506261	-0.889182	-0.131735	-0.137259	0.579722	NA	0.417241
YGL008C;YPL036W	P05030;P19657	PMA1;PMA2	RBP	F1-F4	-0.159896	0.445162	0.29808	-0.150789	-0.432556	-1.19	-1.93357	-0.10589	0.484539	0.380429	0.36874	-0.89759	-1.96465	-0.346632	-0.175585	-0.329126	NA	-0.925697
YER003C	P29952	PMI40	RBP	F1-F4	0.638274	0.364804	-0.0352652	-0.716405	-0.251408	1.19483	-1.00419	-0.303019	-0.068619	-0.460845	NA	0.965888	-0.770423	0.00193014	0.069429	-0.496576	NA	0.815335
YGL167C	P13586	PMR1	NA	NA	0.300434	-0.257098	-0.34377	NA	NA	-0.789265	-0.0578765	-0.0643463	NA	NA	NA	NA	-0.106576	-0.164721	NA	NA	NA	NA
YGL037C	P53184	PNC1	RBP	NA	NA	0.132221	NA	-0.044784	-0.219659	0.347257	NA	NA	-0.393839	-0.208186	NA	0.161655	NA	NA	-0.0422067	NA	NA	0.242353
YOR145C	Q99216	PNO1	RBP	NA	0	NA	NA	NA	NA	-0.483347	NA	NA	NA	NA	NA	-0.522261	0.0694263	0.792227	NA	NA	NA	-0.98488
YML069W	Q04636	POB3	RBP	NA	0	NA	NA	NA	NA	1.16168	NA	NA	NA	NA	NA	1.04167	NA	NA	NA	NA	NA	0.931083
YBR088C	P15873	POL30	RBP	NA	0.641126	-0.278055	-0.165278	-0.617254	NA	1.64888	-1.0261	-0.56432	-0.706915	0.0553677	NA	1.4774	-0.538272	-0.724975	-0.632941	NA	NA	1.44118
YNR052C	P39008	POP2	NA	NA	-1.68882	-0.582065	0.345538	0.579071	0.590313	NA	-1.63752	-0.545444	0.56827	NA	NA	-2.50426	NA	-0.0203716	1.10481	0.505834	NA	NA
YNL055C	P04840	POR1	RBP	F1-F4	0.238208	0.198951	-0.110818	-0.435122	NA	-1.49734	-0.996397	-0.594373	0.0577641	-0.00310823	NA	-1.34411	-0.845304	-0.784973	-0.0555985	-0.0565338	NA	-2.06876
YCL057W	P25375	PRD1	NA	NA	-1.77636e-15	NA	NA	NA	NA	1.31653	NA	NA	NA	NA	NA	0.965411	NA	NA	NA	NA	NA	0.937808
YER012W	P22141	PRE1	RBP	NA	-0.0436499	-0.0794144	NA	0.103492	0.0632221	0.284032	-0.718084	-0.206295	0.298381	NA	NA	0.25885	-0.710573	-0.032347	0.265716	NA	NA	0.501684
YOR362C	P21242	PRE10	RBP	NA	0.242791	0.165472	-0.535551	-0.210739	0.140503	0.213979	-0.958365	-0.442516	0.138914	NA	NA	0.181482	-1.08789	-0.532784	0.0685456	0.2858	NA	-0.239881
YPR103W	P30656	PRE2	RBP	F1-F4	0.149741	0.175151	0.0918071	-0.297947	-0.118752	-0.0269108	-1.20149	-0.249657	-0.105634	-0.106031	NA	-0.129575	-1.6568	-0.496139	-0.552401	0.166303	NA	-0.145241
YJL001W	P38624	PRE3	NA	F1-F4	-0.110913	0.179697	-0.118306	-0.260669	0.310191	0.0118625	-1.02997	-0.0181736	0.193959	0.429477	NA	0.155714	-1.02831	0.0230159	0.356142	0.719299	NA	0.00841324
YFR050C	P30657	PRE4	NA	NA	0.332026	-0.442702	NA	NA	NA	1.21752	-0.473867	-0.250432	NA	NA	NA	0.719117	-0.702023	NA	NA	NA	NA	0.791745
YMR314W	P40302	PRE5	RBP	NA	0.617683	-0.269614	-0.165357	-0.127035	-0.0970162	0.576083	-0.741058	-0.173544	-0.0934803	-0.0978635	NA	0.542539	-0.595098	-0.475687	-0.262247	NA	NA	0.490546
YOL038W	P40303	PRE6	RBP	F1-F4	0.549285	0.0508053	0.131972	-0.458922	-0.240147	0.472171	-0.946085	-0.233766	-0.282829	0.590839	NA	0.265027	-1.0149	-0.145867	-0.276209	0.40921	NA	0.360455
YBL041W	P23724	PRE7	RBP	NA	0.0420743	0.31221	0.011495	-0.194487	-0.168418	0.129718	-0.937999	-0.474254	-0.177481	-0.0423799	NA	-0.0252206	-1.17162	-0.212594	-0.121777	NA	NA	-0.219626
YML092C	P23639	PRE8	NA	NA	0.324887	0.155082	0.0786148	-0.290438	-0.268146	-0.185088	-1.05361	-0.550364	0.0927948	NA	NA	-0.341377	-1.15796	-0.300057	-0.110033	-0.11364	NA	-0.296736
YGR135W	P23638	PRE9	RBP	NA	0.448358	0.0920303	-0.0301519	-0.564809	-0.17326	0.411437	-1.00587	-0.344966	0.10161	NA	0.992283	0.108033	-0.888716	-0.828178	0.011268	NA	NA	-0.0360671
YOR323C	P54885	PRO2	RBP	F1-F4	0.655379	0.324997	-0.426518	-0.368516	-0.389297	1.47557	-0.947445	-0.528422	-0.250824	-0.72374	NA	1.53653	-0.548644	-0.38856	-0.21136	-0.801486	NA	1.36401
YER023W	P32263	PRO3	RBP	F1-F4	-0.209097	0.253802	-0.251797	-0.0100144	0.154157	0.883239	-1.21986	-0.448405	-0.140415	0.125566	NA	0.982142	-1.54646	-0.475749	0.0587827	0.296936	NA	0.747375
YGL120C	P53131	PRP43	RBP	NA	-0.0901502	0.146476	-0.2948	-0.0708786	0.162261	-0.579157	-0.152363	0.499604	0.222969	NA	NA	-0.569566	-0.236118	0.0518475	0.486631	NA	NA	-0.329727
YKL181W	P32895	PRS1	RBP	NA	-0.108557	0.144743	NA	NA	NA	1.92999	NA	0.509543	0.29953	NA	NA	1.7298	-0.419113	NA	NA	NA	NA	1.78738
YHL011C	P38689	PRS3	RBP	NA	1.77636e-15	NA	NA	NA	NA	1.3877	NA	-0.0617287	NA	NA	NA	1.53396	NA	NA	NA	NA	NA	1.26629
YOL061W	Q12265	PRS5	RBP	NA	-0.219906	0.0123425	NA	0.42747	NA	1.79944	NA	-0.194615	NA	NA	NA	1.57814	NA	-0.076077	NA	NA	NA	1.45939
YOR361C	P06103	PRT1	TF	F1-F4	-0.709307	0.434543	0.204489	0.148138	-0.0778634	-1.6015	-1.30716	-0.716997	-0.359366	-0.600634	-1.56632	-1.73708	-1.56465	-0.737502	-0.652643	-0.766286	NA	-1.74263
YDL055C	P41940	PSA1	RBP	F1-F5	0.222117	0.272166	-0.0337336	-0.290535	-0.170013	1.36611	-1.43163	-0.502669	-0.135334	-0.190964	-0.0520263	1.31591	-1.15794	-0.0991911	0.176112	0.158137	0.208156	1.26667
YMR308C	P32337	PSE1	RBP	NA	-1.77636e-15	NA	NA	NA	NA	0.860128	NA	NA	NA	NA	NA	0.718148	NA	NA	NA	NA	NA	0.58467
YML017W	P50109	PSP2	RBP	NA	-0.247314	0.190404	NA	0.139348	NA	NA	-0.483805	-0.110321	0.0899373	NA	NA	NA	-0.478388	NA	NA	NA	NA	NA
YDR032C	Q12335	PST2	RBP	NA	-0.0394716	0.121941	-0.0429975	NA	NA	0.396969	-1.05304	-0.591036	NA	NA	NA	0.473999	-1.10625	NA	NA	NA	NA	0.346295
YKL039W	P32857	PTM1	NA	NA	0.529742	-0.529742	NA	NA	NA	-2.14622	-0.716355	-0.567035	NA	NA	NA	-1.68156	-1.02146	-0.430772	NA	NA	NA	-1.8493
YNL016W	P32588	PUB1	RBP	F1-F4	-0.831151	0.360937	-0.284992	0.434884	0.320322	-0.793394	-1.00149	-0.0674151	0.205573	0.551283	NA	-1.37669	-1.45211	-0.0900007	0.145945	0.502862	NA	-1.12217
YDR496C	Q04373	PUF6	RBP	NA	0.832118	-1.10949	NA	NA	NA	-1.80034	-1.11991	-1.0175	NA	NA	NA	-1.87465	-1.52073	-0.842713	NA	NA	NA	-1.49865
YOR157C	P25043	PUP1	NA	NA	0.0604762	-0.0604762	NA	NA	NA	0.125656	-0.664463	NA	NA	NA	NA	-0.283544	-0.672399	NA	NA	NA	NA	-0.0499153
YGR253C	P32379	PUP2	NA	NA	-0.122572	0.122572	NA	NA	NA	0.507411	-0.6741	-0.0865668	NA	NA	NA	0.563274	-0.842002	-0.525736	NA	NA	NA	0.231741
YER094C	P25451	PUP3	RBP	NA	0.462081	0.0842236	-0.182547	-0.516159	-0.0937118	0.179822	-0.791142	-0.569998	0.136388	NA	NA	0.108581	-0.860802	-0.572894	0.180487	NA	NA	0.0956107
YPL212C	Q12211	PUS1	RBP	NA	0.0786106	-0.157221	NA	NA	NA	0.264723	0.00950557	-0.218498	NA	NA	NA	0.523336	0.61407	0.0557555	NA	NA	NA	0.538203
YOR243C	Q08647	PUS7	RBP	NA	0.012434	0.043701	-0.068569	NA	NA	-0.408761	-0.0906239	0.120904	NA	NA	NA	-0.369207	-0.00845878	0.392326	0.30602	NA	NA	-0.263976
YLR196W	P21304	PWP1	RBP	NA	0.00501548	-0.00752322	NA	NA	NA	0.930128	0.318701	-0.132375	NA	NA	NA	1.03487	-0.0605264	0.20326	NA	NA	NA	1.38746
YGL062W	P11154	PYC1	RBP	NA	0	NA	NA	NA	NA	0.90176	NA	NA	NA	NA	NA	1.02498	NA	NA	NA	NA	NA	1.00236
YBR218C	P32327	PYC2	RBP	NA	-1.77636e-15	NA	NA	NA	NA	1.06444	NA	NA	NA	NA	NA	1.05543	NA	NA	NA	NA	NA	1.03561
YPR191W	P07257	QCR2	NA	NA	-0.0485503	0.154254	-0.197082	0.131453	-0.178692	0.146667	-1.15094	-0.348089	0.329298	0.112589	NA	-0.0145242	NA	-0.311333	0.401897	NA	NA	-0.350761
YHR074W	P38795	QNS1	RBP	NA	-0.153203	0.153203	NA	NA	NA	0.609273	-0.383238	NA	NA	NA	NA	0.349573	NA	NA	NA	NA	NA	1.02419
YDL103C	P43123	QRI1	RBP	NA	-0.251968	0.377952	NA	NA	NA	0.742853	NA	NA	NA	NA	NA	0.803771	NA	0.285939	NA	NA	NA	0.798314
YEL037C	P32628	RAD23	RBP	NA	0	NA	NA	NA	NA	-0.0438863	NA	NA	NA	NA	NA	0.288524	NA	NA	NA	NA	NA	0.275689
YGL246C	P53063	RAI1	RBP	NA	0	NA	NA	NA	NA	NA	1.09516	NA	NA	NA	NA	NA	0.559769	NA	NA	NA	NA	NA
YOR048C	Q02792	RAT1	RBP	NA	-1.77636e-15	NA	NA	NA	NA	-1.59623	0.718469	-0.887501	NA	NA	NA	-1.37748	0.666726	NA	NA	NA	NA	-2.37148
YAL036C	P39729	RBG1	NA	F1-F5	-1.51803	0.182244	0.411803	0.407632	0.516352	-3.14572	-1.4635	0.201172	0.609979	0.77164	0.0835492	-3.12491	-1.54393	0.414061	0.876491	0.997522	-0.248077	-3.37763
YGR173W	P53295	RBG2	RBP	NA	-0.0314065	0.0409881	0.0218249	NA	NA	0.308166	-0.494724	-0.0706145	NA	NA	NA	0.110588	-0.463903	0.0075713	0.212699	NA	NA	0.316244
YDL135C	Q12434	RDI1	NA	NA	0	NA	NA	NA	NA	0.288764	-0.692153	-0.714549	-0.471082	NA	NA	-0.339671	-0.442863	0.0339899	NA	NA	NA	0.315442
YJL217W	P40893	REE1	NA	NA	1.77636e-15	NA	NA	NA	NA	0.832786	NA	NA	NA	NA	NA	0.684242	NA	NA	NA	NA	NA	0.754434
YOR207C	P22276	RET1	RBP	NA	-0.0686955	0.100382	0.0832097	-0.0308001	NA	NA	NA	0.613928	NA	0.471722	NA	NA	NA	0.630931	NA	NA	NA	NA
YAR007C	P22336	RFA1	RBP	NA	-0.199177	0.199177	NA	NA	NA	0.710488	NA	NA	NA	NA	NA	0.958611	NA	NA	NA	NA	NA	0.857062
YOL143C	P50861	RIB4	NA	NA	8.04503e-05	0.223821	0.0571105	0.0934687	-0.515026	2.27364	-1.52294	-0.864641	-0.341843	-0.0761106	NA	2.13046	-1.50889	-0.584864	-0.339611	NA	NA	1.80772
YCR028C-A	P32445	RIM1	RBP	NA	-0.691548	0.763626	0.237656	NA	NA	-1.43069	-0.82099	-0.311798	0.0839415	NA	NA	-1.28533	NA	-1.04935	NA	NA	NA	-1.88038
YHR197W	P38883	RIX1	NA	NA	0	NA	NA	NA	NA	-1.37677	0.419958	NA	NA	NA	NA	NA	0.033173	NA	NA	NA	NA	-1.48695
YLL034C	Q07844	RIX7	RBP	NA	-1.18424e-15	NA	NA	NA	NA	-1.1984	0.977776	-0.196828	NA	NA	NA	NA	0.797435	NA	NA	NA	NA	-1.35646
YOR095C	Q12189	RKI1	NA	NA	-0.0205084	0.0161963	-0.161063	-0.187556	0.354369	0.61113	NA	0.00701008	0.345891	NA	NA	0.420288	-0.771112	-0.0626779	0.799664	NA	NA	0.534649
YMR247C	Q04781	RKR1	NA	NA	-8.88178e-16	NA	NA	NA	NA	NA	-0.342915	-0.423344	NA	NA	NA	NA	NA	NA	NA	NA	NA	NA
YDR091C	Q03195	RLI1	TF	F1-F4	0.116146	0.262398	0.14818	-0.0791068	-0.447617	-1.6184	0.131725	-0.642481	-0.846001	-1.00349	NA	-1.53022	-0.599419	-0.766852	-0.925702	-1.23289	NA	-1.49145
YLR009W	Q07915	RLP24	RBP	NA	1.0217	-1.0217	NA	NA	NA	NA	NA	NA	NA	NA	NA	NA	NA	-1.09781	NA	NA	NA	NA
YNL002C	P40693	RLP7	RBP	NA	0.846976	-0.27484	-0.719873	-0.424399	NA	-1.22774	0.277087	0.0234114	-0.272272	NA	NA	-1.26107	-0.119931	-0.192901	NA	NA	NA	-1.11509
YMR235C	P11745	RNA1	RBP	F1-F4	0.408038	-0.0404629	0.0512507	-0.133159	-0.380889	1.25309	-0.666963	-0.074985	-0.371164	-0.524474	NA	1.35107	-0.159965	0.00070053	0.215067	0.0903381	NA	0.985088
YCL028W	P25367	RNQ1	NA	F1-F4	0.95156	-0.143594	-0.780124	-0.330034	-0.175739	NA	-0.370585	0.265906	0.544998	0.145284	NA	-2.36045	-0.690291	-0.639778	0.709801	0.425827	NA	NA
YER070W;YIL066C	P21524;P21672	RNR1;RNR3	RBP	F1-F4	-0.494383	0.182963	-0.117251	0.252208	0.14715	2.86563	-0.763665	-0.609785	0.733541	0.530806	NA	2.755	-1.25347	-0.734765	0.00508756	-0.135946	NA	2.88036
YJL026W	P09938	RNR2	RBP	F1-F5	-0.0356695	0.228992	0.0322758	-0.306163	0.0805642	0.920235	-1.46645	-0.506983	-0.125285	0.140613	0.884608	0.956943	-1.45604	-0.495927	-0.086092	0.453813	1.13034	0.808126
YGR180C	P49723	RNR4	RBP	F1-F5	0.415068	0.135964	0.25168	-0.516429	-0.286283	2.04018	-0.948117	-0.551051	-0.387105	-0.172945	0.234818	1.88281	-1.17342	-0.354384	0.0381625	-0.059935	0.487726	1.5737
YPR010C	P22138	RPA135	RBP	F1-F4	-0.266199	-0.0397139	-0.0847551	0.247728	0.14294	-0.375519	0.154338	0.304312	0.979744	0.898332	NA	-0.348622	-0.490631	0.516719	1.04693	1.03802	0.904905	-0.100711
YOR341W	P10964	RPA190	RBP	F1-F4	-0.22452	0.160955	-0.0991578	0.0713897	0.0913338	-0.60716	-0.1809	0.414776	1.20332	1.40048	NA	-0.690873	-0.596597	0.663544	1.14185	1.4823	NA	-0.143608
YOR340C	P46669	RPA43	NA	NA	0	NA	NA	NA	NA	NA	NA	NA	NA	NA	NA	NA	NA	NA	NA	NA	NA	-0.282014
YNL248C	Q01080	RPA49	NA	NA	-0.0264304	0.0528608	NA	NA	NA	-1.13922	0.302975	0.326464	0.529837	NA	NA	-1.57058	-0.0588067	0.573189	1.24544	NA	NA	-1.33978
YOR151C	P08518	RPB2	RBP	NA	-0.25828	0.00382172	-0.209152	0.127622	0.2837	1.2736	-0.638702	-0.282672	0.583907	0.894383	NA	1.14817	-0.756443	-0.152162	0.229741	NA	NA	1.0659
YBR154C	P20434	RPB5	NA	NA	0.0242897	NA	NA	-0.0485794	NA	-0.70238	NA	0.771199	NA	NA	NA	-0.573923	-0.128056	-0.28939	2.05402	NA	NA	0.653747
YOR224C	P20436	RPB8	NA	NA	-0.125773	0.269683	NA	-0.152979	NA	-0.0142106	-0.324042	0.238649	NA	NA	NA	0.212772	-0.205294	0.241036	NA	NA	NA	0.357695
YPR110C	P07703	RPC40	RBP	F1-F4	0.101033	0.233857	-0.185867	-0.0177729	-0.180924	-0.706764	-0.0063201	0.343014	0.593377	0.717247	NA	-0.870552	0.0424791	0.748874	1.00762	0.976127	NA	-0.66757
YHR088W	P38805	RPF1	RBP	NA	0.19504	-0.390081	NA	NA	NA	NA	-0.0239158	-0.161663	NA	NA	NA	NA	-0.169083	NA	NA	NA	NA	NA
YKR081C	P36160	RPF2	RBP	NA	0.663628	-1.32726	NA	NA	NA	-2.35166	0.00461428	NA	NA	NA	NA	-2.31391	-0.014215	NA	NA	NA	NA	-2.63418
YBR079C	P38249	RPG1	TF	F1-F5	-0.52495	0.371436	0.285916	0.0844455	-0.216848	-1.59738	-0.719099	-0.841823	-0.494561	-0.593742	-1.06626	-1.65529	-1.31069	-0.742228	-0.678295	-0.666099	-1.2505	-1.76496
YLR075W	P41805	RPL10	RP	F1-F5	-0.251308	-0.302338	-0.0984197	0.353028	0.299038	-2.01749	1.42587	0.260609	-0.200616	-0.520701	-2.45022	-2.0955	1.76361	0.412064	0.171172	-0.571462	-2.28034	-1.70953
YGR085C;YPR102C	Q3E757;P0C0W9	RPL11b;RPL11a	RP	F1-F5	-0.453477	-0.283953	0.192568	0.161538	0.383324	-2.83684	0.889756	0.0660234	-0.508106	-0.514338	-0.72946	-2.64421	1.23802	0.459569	0.00560365	-0.0473362	-0.828137	-2.32476
YEL054C;YDR418W	P0CX54;P0CX53	RPL12a;RPL12b	RP	F1-F5	-0.3122	-0.184331	-0.0730082	0.472184	0.0973558	-3.49379	0.809433	0.145475	-0.702758	-0.698745	-1.23543	-3.57217	1.28854	0.383766	-0.0286233	-0.330081	-1.07494	-2.99623
YMR142C	P40212	RPL13b	RP	NA	0	NA	NA	NA	NA	NA	0.667367	0.495827	NA	NA	NA	NA	0.68961	NA	NA	NA	NA	NA
YLR029C	P05748	RPL15a	RP	NA	0.390002	-0.744038	0.0444942	0.239551	-0.209788	-2.33331	2.04588	0.690537	-1.1434	-1.34363	NA	-2.17964	1.64595	0.581074	-0.858128	NA	NA	-1.31541
YIL133C	P26784	RPL16a	RP	F1-F5	-0.166815	-0.313705	0.25109	0.0866908	0.142739	-2.67496	1.40278	0.229664	-0.416554	-0.571809	-1.96749	-2.38873	1.33808	0.506026	0.479062	0.019918	-1.85278	-2.36011
YNL069C	P26785	RPL16b	RP	F1-F5	-0.168696	-0.468781	0.163949	0.166265	0.307263	-2.03021	1.49662	0.252614	-0.361893	-0.731935	-1.87779	-2.10292	1.52293	0.714576	0.275677	-0.481091	-1.82901	-1.94112
YKL180W	P05740	RPL17a	RP	NA	1.60977	-0.631947	0.567945	0.551479	-2.11325	-1.28411	3.56685	2.19196	-1.65835	-2.48149	NA	-0.581016	3.1678	1.19339	-1.21633	NA	NA	-0.993392
YJL177W	P46990	RPL17b	RP	NA	1.51739	-1.34146	0.708548	0.688151	-1.3955	-2.38935	3.12046	1.89867	-1.95821	-2.09117	NA	-1.39351	2.30404	0.625055	-1.28421	NA	NA	-1.2073
YNL301C;YOL120C	P0CX50;P0CX49	RPL18b;RPL18a	RP	F1-F5	-0.323275	-0.266143	0.0783274	0.342106	0.168985	-2.1771	1.09824	0.519988	-0.240254	-0.957176	-2.47825	-2.17448	1.50041	0.688071	-0.179374	-1.01712	-2.45339	-2.06827
YBR084C-A;YBL027W	P0CX83;P0CX82	RPL19a;RPL19b	RP	F1-F5	-0.0503233	-0.353267	0.102348	0.297026	0.0042153	-2.53056	1.53565	0.634861	-0.576982	-1.09642	-2.62714	-2.74549	1.67911	0.527894	-0.169091	-1.20312	-3.29865	-2.18777
YPL220W;YGL135W	P0CX44;P0CX43	RPL1a;RPL1b	RP	F1-F5	0.0537138	-0.400403	-0.175576	0.354976	0.167288	-2.26261	1.80447	0.219984	-0.653325	-1.14778	-1.61052	-2.56162	1.85951	0.131781	-0.715437	-0.934629	-1.48329	-1.94845
YMR242C;YOR312C	P0CX24;P0CX23	RPL20a;RPL20b	RP	F1-F5	-0.355041	-0.380854	0.132129	0.367564	0.236202	-2.5972	1.22675	0.27979	-0.493562	-0.613446	-1.21378	-2.86362	1.11869	0.151239	-0.242234	-0.730752	-1.33634	-2.42666
YBR191W	Q02753	RPL21a	RP	NA	-0.0238773	NA	NA	1.12989	-1.10601	-2.5466	2.99624	0.331439	NA	NA	NA	-2.10866	2.57263	0.543081	NA	NA	NA	-2.54523
YPL079W	Q12672	RPL21b	RP	NA	0.423077	-0.484491	-0.307435	0.0663261	NA	-1.50721	3.03476	0.88112	NA	NA	NA	-3.10665	2.37129	0.42812	-0.607628	NA	NA	-2.24732
YLR061W	P05749	RPL22a	RP	F1-F5	-0.402883	-0.24985	0.127472	0.315193	0.210069	-3.09375	1.04763	0.360212	-0.240366	-0.503081	-0.534149	-2.99596	1.36819	0.685295	0.57423	0.308212	0.0424212	-2.41709
YFL034C-A	P56628	RPL22b	RP	F1-F4	-0.165604	-0.143264	0.170514	0.207815	-0.0694614	-2.47565	1.06884	0.111426	-0.5242	-0.387886	NA	-2.59892	1.00141	0.446934	0.516209	0.595992	NA	-1.93394
YER117W;YBL087C	P0CX42;P0CX41	RPL23b;RPL23a	RP	F1-F5	-0.580628	-0.161876	0.0643565	0.304751	0.373396	-2.85325	1.19365	0.186114	-0.457828	-0.543565	-1.40492	-2.81383	1.55518	0.458095	0.0976791	-0.0478605	-1.29	-2.2962
YGL031C	P04449	RPL24a	RP	F1-F4	0.420998	-0.319774	-0.0858605	0.579358	-0.594722	-2.01472	2.28179	1.06143	-0.784202	-2.11601	NA	-2.46203	2.0438	0.444556	-0.568778	-1.5287	NA	-1.89836
YGR148C	P24000	RPL24b	RP	F1-F4	0.559205	-0.423016	0.0468112	0.342052	-0.525052	-2.2056	2.07435	0.870334	-1.4064	-1.11573	NA	-2.65678	1.87774	0.441825	-0.898227	-1.71313	NA	-1.67367
YOL127W	P04456	RPL25	RP	F1-F5	-0.293852	-0.281991	0.167023	0.320752	0.088068	-3.16718	0.883546	0.167309	-0.45306	-0.763124	-0.921994	-3.34121	1.01204	0.298422	0.0258637	-0.117297	-0.652155	-2.81317
YLR344W	P05743	RPL26a	RP	NA	NA	NA	NA	-0.137163	0.137163	-1.6417	0.352994	-0.191376	-0.237403	NA	NA	-2.21061	1.90027	1.02846	0.805132	NA	NA	NA
YGR034W	P53221	RPL26b	RP	NA	0.0381377	-0.248345	-0.169845	0.0867035	0.391132	-2.22228	1.39656	0.577916	-0.284849	-0.631838	NA	-2.65652	2.09757	1.27753	0.333637	NA	NA	-2.61032
YHR010W;YDR471W	P0C2H6;P0C2H7	RPL27a;RPL27b	RP	F1-F5	-0.285932	-0.217643	0.101215	0.214539	0.187822	-3.78691	1.15606	0.045832	-0.645714	-0.853688	-1.35824	-3.81621	1.23992	0.0752929	-0.333532	-0.596342	-1.39994	-3.25392
YGL103W	P02406	RPL28	RP	F1-F5	-0.508332	-0.320076	0.145348	0.355242	0.327817	-3.14941	1.40875	0.390708	-0.469818	-0.659552	-1.2527	-3.03437	1.62147	0.227994	0.0323057	0.00845521	-1.35668	-2.59532
YIL018W;YFR031C-A	P0CX46;P0CX45	RPL2b;RPL2a	RP	F1-F5	0.0835985	-0.183849	-0.0681218	0.207898	-0.0395254	-3.00445	1.52631	0.479516	-0.556213	-1.24382	-2.5618	-3.08632	1.76106	0.239298	-0.308744	-1.2847	-2.73604	-2.53157
YOR063W	P14126	RPL3	RP	F1-F5	-0.181432	-0.202553	-0.0609577	0.126985	0.317958	-1.76535	1.81414	0.521018	-0.194537	-0.55126	-1.17451	-2.00006	2.05344	0.624344	0.0991467	-0.130367	-0.836568	-1.58883
YGL030W	P14120	RPL30	RP	F1-F5	-0.230778	-0.518597	0.353475	0.347991	0.0479087	-2.62056	1.32247	0.489018	-0.554095	-1.00805	-1.68834	-2.53898	1.49792	0.498137	0.103358	-0.448126	-1.5093	-2.02043
YDL075W	P0C2H8	RPL31a	RP	NA	-1.77636e-15	NA	NA	NA	NA	NA	2.47632	-0.148919	NA	NA	NA	NA	1.08063	0.123758	NA	NA	NA	NA
YBL092W	P38061	RPL32	RP	F1-F5	0.0833457	-0.646727	0.137945	0.826605	-0.401169	-2.08695	1.8914	0.987854	-1.26327	-1.27676	-1.99286	-2.05608	1.99758	0.862327	-0.194932	-1.52189	-1.53274	-1.54327
YPL143W	P05744	RPL33a	RP	F1-F5	-0.000857371	-0.378648	0.129481	0.386023	-0.135999	-2.92969	1.4192	0.57887	-0.959747	-0.92204	-2.24083	-2.96628	1.39627	0.383816	-0.157271	-0.808579	-2.02182	-2.49938
YOR234C	P41056	RPL33b	RP	F1-F4	0.232511	-0.297004	0.19191	0.283508	-0.410924	-3.36904	1.73223	0.652258	-0.80204	-1.0016	NA	-3.22449	1.59136	0.433844	0.0213346	-0.493726	NA	-2.94724
YER056C-A;YIL052C	P87262;P40525	RPL34a;RPL34b	RP	F1-F4	-0.287433	-0.114015	-0.0480166	0.412675	0.0367897	-2.88256	1.03919	0.197144	-0.147742	-0.781032	-1.22354	-2.84312	1.65605	0.826826	0.139527	-0.392836	NA	-2.37136
YDL136W;YDL191W	P0CX85;P0CX84	RPL35b;RPL35a	RP	F1-F5	-0.142888	-0.372212	0.106375	0.386103	0.0226226	-2.80594	1.14299	0.304235	-0.705583	-1.10157	-1.59471	-2.51293	1.65616	0.417037	0.00140293	-0.647026	-1.69261	-1.94552
YMR194W	P05745	RPL36a	RP	NA	-1.77636e-15	NA	NA	NA	NA	0.438154	1.02137	NA	NA	NA	NA	NA	3.0758	2.18116	NA	NA	NA	0.447066
YPL249C-A	O14455	RPL36b	RP	NA	0.131678	0.391581	-0.370768	-0.196384	NA	-0.470977	0.273349	0.869478	0.243115	NA	NA	-0.984026	1.56815	1.58421	1.82517	NA	NA	0.0777967
YLR185W	P49166	RPL37a	RP	F1-F4	-0.337573	-0.4505	-0.105817	0.210599	1.03551	-1.70765	1.06115	-0.118795	-0.0516595	0.866421	NA	-2.23952	2.79929	1.63598	1.71939	1.31773	NA	-1.62313
YDR500C	P51402	RPL37b	RP	NA	NA	-0.0237277	NA	NA	0.0237277	NA	-1.53158	NA	0.0141354	NA	NA	NA	0.754123	-0.304802	0.0251924	NA	NA	-1.12566
YLR325C	P49167	RPL38	RP	F1-F5	-0.21808	-0.303801	0.336628	0.148585	0.0366676	-3.02974	1.22181	-0.087644	-0.274681	-0.597502	-0.241681	-3.00566	2.09908	0.940094	0.828366	0.804101	0.00798745	-2.73746
YJL189W	P04650	RPL39	RP	NA	0	NA	NA	NA	NA	-2.44589	1.01294	-0.526871	NA	NA	NA	NA	2.97811	-0.764455	NA	NA	NA	NA
YHR141C;YNL162W	P0CX28;P0CX27	RPL42b;RPL42a	RP	F1-F4	-0.456721	0.305306	0.595161	-0.984795	0.365025	-2.47981	1.64353	-0.29792	0.67446	0.383832	NA	-2.34381	3.1834	0.499073	1.29551	1.15231	NA	-1.98228
YPR043W;YJR094W-A	P0CX26;P0CX25	RPL43a;RPL43b	RP	F1-F5	-0.358363	-0.707338	0.107245	0.578307	0.380149	-3.3708	0.978764	0.144456	-0.199317	-0.55846	-0.510609	-3.09633	1.0812	0.442882	0.118333	0.123211	-0.373868	-2.43784
YBR031W	P10664	RPL4a	RP	NA	1.42767	-0.0192794	NA	0.638706	-2.31651	-3.19283	4.29924	0.380153	NA	NA	NA	-2.86471	3.78789	0.127659	NA	NA	NA	-1.89077
YDR012W	P49626	RPL4b	RP	NA	-1.18424e-15	NA	NA	NA	NA	NA	2.48901	-0.598347	NA	NA	NA	NA	2.6426	NA	NA	NA	NA	NA
YPL131W	P26321	RPL5	RP	F1-F5	0.204447	-0.37062	-0.0311799	0.256174	-0.0588213	-2.07111	1.9316	0.616388	-0.405466	-0.861956	-1.25967	-2.18969	1.92631	0.551378	-0.159221	-0.34932	0.12449	-1.81677
YML073C	Q02326	RPL6a	RP	F1-F5	0.413321	-0.522845	0.148396	0.267985	-0.306857	-2.4322	1.82821	0.617333	-1.18859	-1.6862	-1.56539	-2.76689	1.65919	0.330347	-0.74125	-1.35285	-1.95668	-2.06962
YLR448W	P05739	RPL6b	RP	F1-F5	-0.123248	-0.429645	0.131622	0.193928	0.227342	-3.33433	1.21332	0.161662	-0.750081	-1.01784	-1.21056	-3.2744	1.17097	0.212337	-0.338161	-0.514202	-1.48653	-2.85242
YGL076C	P05737	RPL7a	RP	NA	-0.205003	-0.583311	-0.65765	0.398727	1.37606	-4.52871	0.0474043	0.845023	0.50925	NA	NA	-2.91662	-0.282271	1.14847	-0.566014	0.716148	NA	-3.79214
YPL198W	Q12213	RPL7b	RP	F1-F4	-1.01373	-0.533749	-0.311552	1.44016	0.57465	-3.4066	0.917712	1.2617	-0.259607	0.456935	NA	-3.43659	-0.0164176	0.50504	0.882219	0.479266	NA	-2.86268
YHL033C	P17076	RPL8a	RP	NA	0.903382	-0.394529	-0.599462	-0.257065	0.178056	-1.69344	3.06809	1.51097	-0.244693	NA	NA	-1.78762	3.13866	0.682024	-0.438793	NA	NA	-1.20954
YLL045C	P29453	RPL8b	RP	F1-F4	1.48036	-1.2498	0.0123076	-0.0588711	-0.245328	-1.25824	4.01118	1.50074	-0.817631	-0.877163	NA	-1.24096	4.12849	1.17098	-0.51323	-0.654613	NA	-0.850162
YGL147C	P05738	RPL9a	RP	F1-F5	-0.227261	-0.128495	0.00690304	0.0724623	0.27639	-2.71249	1.23029	0.260771	-0.478417	-0.871414	-1.16946	-2.85125	1.5569	0.706224	0.371756	-0.192317	-1.86156	-2.37617
YNL067W	P51401	RPL9b	RP	F1-F5	-0.0826308	-0.176324	-0.0111528	0.116806	0.153302	-2.83721	0.937288	0.227613	-0.584132	-0.966901	-1.25309	-2.77216	1.10558	0.371863	-0.0319651	-0.507517	-1.22626	-2.66842
YHR027C	P38764	RPN1	RBP	F1-F4	0.0144873	0.046374	-0.126115	-0.11473	0.179984	1.44975	-0.748634	-0.692474	0.246737	0.107952	NA	1.3987	-1.1243	-0.239677	-0.58215	0.176267	NA	0.921693
YHR200W	P38886	RPN10	RBP	NA	0.118542	0.216425	-0.114491	-0.413454	-0.084745	-0.00125416	-0.498913	-0.401165	0.548377	NA	NA	-0.0305858	-1.67877	-0.135842	0.0974046	0.75199	NA	-0.0463084
YFR004W	P43588	RPN11	RBP	NA	-0.0362732	0.0483642	NA	NA	NA	0.387749	-0.490832	-0.327535	NA	NA	NA	0.331069	-0.701248	0.122642	0.196702	NA	NA	0.317635
YIL075C	P32565	RPN2	RBP	F1-F4	0.459603	0.441512	-0.355464	-0.557805	0.0162047	1.23285	-0.573815	-0.359005	0.264039	0.203311	NA	1.11872	-0.787746	-0.813746	-1.09778	-1.28342	NA	1.089
YER021W	P40016	RPN3	RBP	F1-F4	0.476759	0.100833	-0.167083	-0.45228	NA	1.14781	-1.04561	-0.479512	-0.0588618	0.337386	NA	1.06568	-0.964682	-0.624263	-0.30398	0.291823	NA	1.02485
YDL147W	Q12250	RPN5	RBP	NA	0.0473693	0.0177175	-0.019051	-0.0743203	0.000357818	0.481488	-0.661503	-0.0882491	-0.124872	NA	NA	0.182157	-0.874642	-0.222118	0.154582	NA	NA	0.213508
YDL097C	Q12377	RPN6	NA	F1-F4	0.342866	0.0571739	-0.0145249	-0.324514	-0.0610003	0.507802	-1.1398	-0.300163	0.0781871	0.193508	NA	0.449636	-1.37577	-0.281162	-0.0424088	0.29354	NA	0.370552
YPR108W	Q06103	RPN7	RBP	NA	-8.88178e-16	NA	NA	NA	NA	-0.0120071	-1.04872	-0.825725	NA	NA	NA	-0.0351345	-0.888999	NA	NA	NA	NA	-0.248013
YOR261C	Q08723	RPN8	RBP	NA	0.0767494	-0.153499	NA	NA	NA	-0.246998	-0.0626113	-0.0870547	NA	NA	NA	-0.487286	-0.208824	NA	NA	NA	NA	-0.0572314
YDR427W	Q04062	RPN9	RBP	NA	0.258867	-0.142281	-0.202875	NA	NA	1.00733	-0.783347	-0.445414	NA	NA	NA	0.874719	-1.04851	-0.418156	NA	NA	NA	0.614371
YDL140C	P04050	RPO21	RBP	NA	0.294148	0.0632888	-0.217289	-0.0577288	-0.120919	1.7757	-0.296286	0.274109	0.751007	1.02208	NA	1.51264	-0.806387	0.0278894	0.239678	NA	NA	1.49666
YLR340W	P05317	RPP0	RP	F1-F5	-0.434564	-0.171628	0.139234	0.128331	0.338627	-2.74947	1.26925	0.0339477	-0.479554	-0.612365	-1.04234	-2.76337	1.34794	0.180455	-0.0399234	-0.408324	-1.05489	-2.68364
YDL081C	P05318	RPP1a	RP	NA	1.18424e-15	NA	NA	NA	NA	-0.0186504	2.54725	1.11426	NA	NA	NA	-0.0308861	3.90499	1.52163	2.47996	NA	NA	0.262089
YDL130W	P10622	RPP1b	RP	F1-F4	-0.986227	-0.562781	0.585583	0.252484	0.569793	-2.04394	1.36467	0.0398625	-0.316619	-0.32438	NA	-1.94948	2.45183	1.63139	0.821927	0.415972	NA	-1.77131
YOL039W	P05319	RPP2a	RP	F1-F4	-0.44373	-0.713721	-0.476174	0.412449	1.2316	-2.42799	1.83995	0.128317	-0.436558	0.176983	NA	-2.25141	2.59152	0.535758	0.360603	0.196665	NA	-2.16835
YDR382W	P02400	RPP2b	RP	F1-F5	-0.386333	-0.18039	-0.0635343	0.371405	0.258853	-2.96018	1.76583	0.0969296	-0.70502	-0.975298	-1.28817	-3.01802	1.94632	0.448644	-0.0234259	0.224961	-0.751313	-2.49103
YGR214W	P32905	RPS0a	RP	NA	-0.870581	-0.603418	-0.186514	1.28881	0.464963	NA	1.16371	1.0498	-0.188767	NA	NA	-2.56367	0.749779	0.865559	0.0175386	NA	NA	-2.07009
YLR048W	P46654	RPS0b	RP	NA	-0.359764	-0.418233	-0.146761	0.389012	0.584666	-0.868857	0.415508	-0.681539	-0.849278	NA	NA	-0.583265	0.47567	0.580843	0.787753	-0.409927	NA	-0.720681
YOR293W;YMR230W	Q08745;P46784	RPS10a;RPS10b	RP	F1-F5	0.946305	-0.797236	0.0428119	0.776074	-0.967955	-1.15805	2.99539	1.27047	-0.607998	-1.45146	-1.39859	-1.20928	3.38635	1.34227	0.265686	-0.959309	-0.907323	-0.632065
YBR048W;YDR025W	P0CX48;P0CX47	RPS11b;RPS11a	RP	F1-F5	-0.439525	-0.255299	-0.0418221	0.331102	0.405544	-2.87689	0.633541	0.166757	-0.256891	-0.847246	-1.69316	-2.88688	1.07786	0.398755	-0.0376638	-1.02646	-1.99701	-2.19405
YOR369C	P48589	RPS12	RP	F1-F5	0.129797	-0.543483	0.133259	0.415342	-0.134915	-1.33073	2.11639	0.703967	-1.01133	-0.897901	-1.81421	-1.51658	2.44658	0.364487	-0.274956	-0.993365	-1.22039	-1.18952
YDR064W	P05756	RPS13	RP	F1-F5	-0.512635	-0.313582	0.111209	0.328386	0.386621	-2.98789	1.16117	0.24348	-0.631235	-0.664567	-1.63914	-3.14806	1.20053	0.243576	-0.024259	-0.358982	-1.65234	-2.75648
YCR031C	P06367	RPS14a	RP	NA	NA	NA	0	NA	NA	NA	NA	NA	NA	NA	NA	NA	NA	NA	NA	1.83604	0.855443	NA
YOL040C	Q01855	RPS15	RP	F1-F5	-0.442151	-0.152482	0.0376312	0.264071	0.292931	-2.29914	1.68579	0.439731	-0.617277	-0.775509	-1.19119	-2.8074	2.04134	0.567673	0.0469418	-0.466135	-1.03998	-2.21835
YMR143W;YDL083C	P0CX52;P0CX51	RPS16a;RPS16b	RP	F1-F5	-0.423623	-0.192297	0.202733	0.21591	0.197278	-2.47556	1.03996	0.143278	-0.615503	-0.702573	-1.07942	-2.69366	1.4329	0.298838	0.0607045	-0.20273	-0.681873	-2.57963
YDR447C;YML024W	P14127;P02407	RPS17b;RPS17a	RP	F1-F5	-0.189766	-0.500132	0.181793	0.316917	0.191189	-3.0976	1.05286	0.0560986	-0.680932	-0.667411	-1.45342	-3.14108	1.13832	0.153414	-0.213032	-0.55839	-1.55321	-2.48924
YML026C;YDR450W	P0CX56;P0CX55	RPS18b;RPS18a	RP	F1-F5	-0.233154	-0.557504	0.274419	0.347287	0.168953	-2.12273	1.3227	0.367845	-0.607277	-0.627106	-1.2269	-2.22433	1.34064	0.39603	-0.232671	-0.219445	-0.974404	-1.9209
YLR441C	P33442	RPS1a	RP	F1-F5	-0.363048	-0.14141	-0.0149927	0.247669	0.271782	-3.09792	1.08086	0.224979	-0.497593	-0.50032	-1.25101	-3.26821	1.21727	0.280604	-0.0965109	-0.165855	-1.5672	-2.87033
YML063W	P23248	RPS1b	RP	F1-F5	-0.465597	-0.28585	0.166692	0.125801	0.458954	-3.13061	1.07843	0.253415	-0.463669	-0.447612	-1.14886	-3.38185	0.888671	0.211101	0.0214443	-0.045637	-1.67615	-2.90825
YGL123W	P25443	RPS2	RP	F1-F5	0.0771668	-0.193147	-0.10506	0.388387	-0.167347	-2.3842	2.08181	0.724977	-0.35181	-1.2247	-2.69439	-2.35154	2.00425	0.681034	-0.0882457	-1.28322	-3.18024	-1.70166
YHL015W	P38701	RPS20	RP	F1-F5	-0.405943	-0.148728	0.0187443	0.3064	0.229527	-2.69246	1.10009	0.215322	-0.430384	-0.653752	-1.52164	-2.88935	1.30437	0.460742	0.139083	-0.398529	-1.18136	-2.64914
YKR057W	P0C0V8	RPS21a	RP	F1-F4	-0.621482	-0.33902	0.194336	0.470401	0.295765	-3.32243	1.26675	0.233641	-0.450706	0.0662935	NA	NA	1.61437	0.210334	0.450594	-1.22131	NA	-3.02929
YJL136C	Q3E754	RPS21b	RP	F1-F4	-0.215433	-0.348947	-0.14323	0.585131	0.122478	-2.84861	2.01056	0.627254	-0.602967	-0.574996	NA	-2.94735	2.20193	0.419716	0.20284	-1.00003	NA	-2.46744
YLR367W;YJL190C	Q3E7Y3;P0C0W1	RPS22b;RPS22a	RP	F1-F5	0.377987	-0.560954	-0.0101527	0.296095	-0.102975	-1.87692	2.39686	0.81713	-0.417638	-0.652502	-1.61681	-2.26445	2.5545	0.765712	0.136838	-0.327082	-0.815778	-1.56431
YPR132W;YGR118W	P0CX30;P0CX29	RPS23b;RPS23a	RP	F1-F5	0.137254	-0.299739	-0.144114	0.399252	-0.0926526	-2.36828	1.81135	0.754253	-0.644729	-1.13277	-2.48994	-2.27029	2.43683	0.972682	0.0594978	-1.39799	-1.95089	-1.7532
YER074W;YIL069C	P0CX32;P0CX31	RPS24a;RPS24b	RP	F1-F5	-0.486208	-0.294203	0.370834	0.187441	0.222137	-2.98041	1.51127	0.386592	-0.500906	-0.619872	-1.07109	-2.95943	1.47952	0.428542	-0.0068311	-0.14045	-1.16688	-2.47196
YGR027C;YLR333C	Q3E792;P0C0T4	RPS25a;RPS25b	RP	F1-F4	0.315835	-0.0720948	-0.163802	-0.0715267	-0.089847	-1.20675	2.22915	0.543145	-0.234814	-1.17597	NA	-1.33655	3.21629	0.973475	0.34811	0.0121266	NA	-1.1551
YGL189C;YER131W	P39938;P39939	RPS26a;RPS26b	RP	F1-F5	-0.734196	-0.207158	0.117237	0.383128	0.440989	-2.99541	1.10449	0.189151	-0.372309	-0.480385	-1.08657	-3.1332	1.47758	0.707299	0.445993	0.39297	-0.916586	-2.59758
YHR021C;YKL156W	P38711;P35997	RPS27b;RPS27a	RP	F1-F5	-0.3638	-0.200104	-0.0228471	0.330053	0.256698	-3.09148	1.61144	0.0988514	-0.367626	-1.14505	-1.63419	-2.9066	1.96923	1.07171	0.518196	-0.575066	-1.00751	-2.34054
YLR388W	P41057	RPS29a	RP	F1-F4	-0.696113	-0.0115543	0.206321	0.0572087	0.444138	-2.478	0.356038	-0.594158	-0.575058	-0.651801	NA	-2.29179	2.21176	1.27162	1.06799	0.704354	NA	-1.90126
YDL061C	P41058	RPS29b	RP	NA	0.0322867	-0.191619	-0.0203902	0.606827	-0.480107	-1.71883	1.24346	0.0956361	-0.462488	NA	NA	-1.99308	2.80316	1.51306	0.820675	NA	NA	-1.08257
YNL178W	P05750	RPS3	RP	F1-F5	-0.386682	-0.22286	0.0460806	0.214708	0.348754	-2.44494	1.14184	0.0896822	-0.464008	-0.624366	-1.15636	-2.65981	1.23079	0.264268	-0.110802	-0.376371	-1.31056	-2.1472
YOR182C;YLR287C-A	P0CX34;P0CX33	RPS30b;RPS30a	RP	F1-F4	-0.9004	-0.259277	0.093271	0.337218	0.729188	-2.53323	1.12754	0.00240507	0.406199	-0.563474	NA	-2.54572	2.03804	1.06118	1.89211	1.60686	2.35848	-2.09661
YHR203C;YJR145C	P0CX36;P0CX35	RPS4b;RPS4a	RP	F1-F5	0.168019	-0.471468	0.0542548	0.374745	-0.12555	-2.36711	2.02517	0.623158	-0.710642	-0.965761	-2.04876	-2.28229	1.9052	0.48867	-0.243754	-1.00025	-1.77461	-1.83384
YJR123W	P26783	RPS5	RP	F1-F5	-0.49759	-0.239751	0.0428639	0.262921	0.431556	-2.09611	1.03917	0.145962	-0.302763	-0.490985	-1.38068	-2.15958	1.45322	0.437738	0.11018	-0.245149	-1.69789	-1.99571
YPL090C;YBR181C	P0CX38;P0CX37	RPS6a;RPS6b	RP	F1-F5	-0.194413	-0.267084	0.0157799	0.289478	0.156239	-2.99618	1.40647	0.228699	-0.615483	-0.962326	-2.64265	-3.0789	1.26477	0.0707208	-0.367614	-0.839395	-2.39449	-2.55974
YOR096W	P26786	RPS7a	RP	F1-F5	0.540505	-0.375784	0.0135825	0.0203302	-0.198633	-2.43583	2.35407	0.994243	-0.805836	-1.05953	-0.998674	-2.15644	2.35792	0.365363	-0.388391	-0.445735	-0.878921	-1.67686
YNL096C	P48164	RPS7b	RP	F1-F5	-0.459945	-0.417618	0.326943	0.278103	0.272518	-3.04046	1.36016	0.208256	-0.436491	-0.327129	-0.871821	-3.05492	1.30676	0.161247	0.0843147	0.264295	-0.644747	-2.59591
YER102W;YBL072C	P0CX40;P0CX39	RPS8b;RPS8a	RP	F1-F5	-0.0270902	-0.411819	0.00304485	0.369644	0.0662211	-2.34226	1.52373	0.472952	-0.630097	-1.03263	-1.53735	-2.27608	1.56903	0.214792	-0.440273	-0.802449	-1.55312	-1.68924
YBR189W	P05755	RPS9b	RP	NA	-0.878744	-0.790395	0.781018	0.0988115	0.690498	NA	-0.575317	0.443226	-0.634382	0.311934	NA	NA	-0.944943	-0.826483	0.977081	NA	NA	NA
YKL145W	P33299	RPT1	RBP	F1-F4	-0.072363	0.280841	0.112624	-0.306232	0.0132859	0.645261	-0.958254	-0.525731	0.133988	0.480949	NA	0.560909	-0.997211	-0.319058	0.128674	0.495399	NA	0.25379
YDL007W	P40327	RPT2	RBP	F1-F4	0.172199	0.000470212	-0.030217	-0.34511	0.270366	0.30031	-0.681029	-0.295901	-0.054611	0.256497	NA	0.441466	-0.659254	-0.53964	-0.0215694	0.387698	NA	0.287647
YDR394W	P33298	RPT3	RBP	NA	0.0179254	-0.164816	0.157063	0.0543097	NA	0.654407	-0.418956	-0.145865	NA	NA	NA	0.333253	-0.409708	-0.454229	NA	NA	NA	0.457119
YOR259C	P53549	RPT4	RBP	NA	0.109287	NA	NA	-0.218575	NA	0.355347	-0.357147	-0.510815	NA	NA	NA	0.496451	-0.627786	-0.45893	0.273084	NA	NA	0.344285
YOR117W	P33297	RPT5	RBP	NA	0.102209	0.270667	-0.201101	-0.444102	NA	0.815236	-0.288016	-0.311737	0.0156385	-0.205075	NA	0.570409	-0.0314316	-0.443533	NA	NA	NA	0.515534
YGL048C	Q01939	RPT6	RBP	NA	0.555736	-0.0907081	-0.357331	-0.19703	NA	0.422368	-0.126174	-0.105079	-0.0653826	NA	NA	0.510688	-0.742009	0.0355231	-0.338989	NA	NA	0.423912
YPL009C	Q12532	RQC2	RBP	NA	0.929806	-0.821836	-0.626857	NA	NA	-0.922076	-0.232576	-0.776308	NA	NA	NA	-0.993886	-0.15241	-0.707316	NA	NA	NA	-0.736439
YMR131C	Q04225	RRB1	RBP	NA	-0.536579	-0.57053	-0.696184	0.907302	0.721944	-1.07069	-1.515	-1.10093	-0.513375	-0.0636223	NA	-1.04322	-1.74093	-0.54197	-0.509589	NA	NA	-0.661862
YPL012W	Q12754	RRP12	RBP	NA	0	NA	NA	NA	NA	-0.546934	0.916016	-0.300273	NA	NA	NA	-0.723378	-0.136306	NA	NA	NA	NA	-0.77862
YMR229C	Q05022	RRP5	RBP	F1-F4	0.135155	0.0427319	-0.501793	0.137911	0.00810766	-1.07344	0.551237	1.1707	1.83483	1.81938	NA	-1.261	0.376187	1.34069	1.88325	1.87708	NA	-0.495546
YER125W	P39940	RSP5	RBP	NA	0	NA	NA	NA	NA	0.151234	NA	NA	NA	NA	NA	0.247428	NA	NA	NA	NA	NA	0.478775
YDR233C	Q04947	RTN1	RBP	F1-F4	-0.0719524	0.0352976	0.0119194	0.0692313	-0.0593278	-1.53092	0.0980059	1.14416	0.946195	0.87955	NA	-1.25272	0.551143	1.3381	1.12014	0.61994	NA	-1.43713
YDR190C	Q03940	RVB1	RBP	F1-F4	-0.0718624	0.141482	-0.114152	-0.0393568	0.0838897	-0.900566	-0.630438	-0.00822155	0.376625	0.291165	NA	-0.727772	-0.824502	0.0470757	0.241146	0.525282	NA	-0.86479
YPL235W	Q12464	RVB2	RBP	NA	0.0851539	0.136488	0.184303	-0.136806	-0.223063	-0.805364	-0.608098	0.400199	0.408006	0.200756	NA	-0.634665	-0.786936	0.292409	0.238278	NA	NA	-0.306709
YKL212W	P32368	SAC1	RBP	F1-F4	0.0307918	0.107388	0.0455971	-0.0451184	-0.15448	NA	-0.698618	0.552562	1.06773	0.894082	NA	NA	-0.232357	0.783609	0.840483	0.567748	NA	-1.47138
YDR129C	P32599;REV__P32599	SAC6	RBP	F1-F4	-0.0225043	0.183278	0.0194274	-0.0247763	-0.155425	1.13683	-0.828089	-0.214987	0.256787	0.171775	NA	1.05159	-1.4031	-0.17432	0.134798	0.128371	NA	1.00809
YER043C	P39954	SAH1	RBP	F1-F5	0.386735	0.284021	-0.136381	-0.292885	-0.24149	2.16939	-0.994067	-0.199795	0.181607	0.102508	0.156852	2.15614	-0.970211	-0.209484	-0.162577	0.0641758	0.107615	1.99687
YLR180W	P10659	SAM1	RBP	F1-F4	0.47952	0.241173	-0.157448	-0.262117	-0.280198	1.79458	-0.940101	-0.0459539	-0.286336	-0.500737	NA	1.77731	-0.73955	-0.452631	-0.332245	0.0902718	NA	1.53432
YDR502C	P19358	SAM2	RBP	F1-F4	0.491297	0.26026	-0.201883	-0.205358	-0.394787	1.31821	-0.950115	-0.410956	-0.279876	-0.932037	NA	1.37537	-1.28991	-0.72442	-0.874568	-0.569182	NA	1.33851
YPL273W;YMR321C	Q08985;Q04898	SAM4;YMR321C	RBP	F1-F4	0.230501	0.455712	0.00643058	-0.482134	-0.21051	0.353379	-1.60606	-0.578061	-0.013181	-0.504909	NA	0.438933	-1.53228	-0.0969053	0.0956607	0.173231	NA	0.282548
YPL218W	P20606	SAR1	RBP	NA	-0.0870736	NA	0.0870736	NA	NA	0.840158	NA	0.016286	NA	NA	NA	0.868024	NA	0.0659607	0.269382	NA	NA	0.793616
YKL117W	P28707	SBA1	RBP	NA	0.166188	0.464697	-0.448731	-0.392449	NA	-0.911583	-0.72615	-0.752996	-0.232428	NA	NA	-0.489741	-0.878172	0.317489	0.11559	0.661676	NA	-0.508519
YHL034C	P10080	SBP1	RBP	F1-F4	-0.0440943	0.248353	-0.00687081	-0.111993	-0.0853947	-2.43992	-0.307426	0.326684	0.238449	-0.270826	NA	-2.53401	-0.46422	0.327428	0.085073	0.111007	NA	-2.34909
YGL011C	P21243	SCL1	RBP	F1-F4	0.31464	0.29679	-0.167443	-0.381192	-0.0627954	0.0392822	-1.50113	-0.379931	-0.12476	0.206785	0.485589	-0.0250577	-1.78227	-0.693021	-0.464003	0.153199	NA	0.00867931
YJL080C	P06105	SCP160	RBP	F1-F5	-2.35114	-0.062348	0.3884	0.974087	1.051	-1.88637	-1.63145	0.808244	2.14609	2.44837	1.6262	-1.88263	-1.41766	1.00087	1.92899	2.13053	0.861864	-1.4513
YGR245C	P53313	SDA1	RBP	NA	0	NA	NA	NA	NA	-1.07497	0.389481	NA	NA	NA	NA	NA	-0.578627	NA	NA	NA	NA	NA
YOL098C	Q12496	SDD3	NA	NA	-0.201024	0.402048	NA	NA	NA	1.77279	0.0388251	0.667874	NA	NA	NA	1.60042	NA	NA	NA	NA	NA	1.31849
YLR208W	Q04491	SEC13	RBP	NA	-0.0340971	-0.0153767	-0.362316	0.297258	NA	1.21063	-0.776034	-0.221694	0.554117	0.610737	NA	1.10464	-0.427587	NA	NA	NA	NA	0.967741
YMR079W;YKL091C	P24280;P33324	SEC14;YKL091C	RBP	F1-F4	0.0821262	0.185697	-0.110965	0.0897228	-0.22415	1.62837	-1.13065	-0.168719	0.212974	0.386863	0.452699	1.54354	-1.22862	-0.504263	0.179598	0.450476	NA	1.57725
YBL050W	P32602	SEC17	NA	NA	0.248773	-0.160328	-0.171369	NA	NA	-1.60205	NA	0.0658678	0.887368	NA	NA	-1.45315	NA	-0.054516	NA	NA	NA	-1.6937
YNL287W	P32074	SEC21	RBP	F1-F4	0.382452	0.299165	-0.205354	-0.32712	-0.149143	-0.105256	-0.300956	-0.172715	0.282693	0.368177	NA	-0.309331	-0.60853	-0.102685	0.0822819	0.0655234	NA	-0.179166
YPR181C	P15303	SEC23	RBP	NA	0.236298	0.618564	-0.300152	-0.341392	-0.384474	1.75343	-0.359833	0.196023	0.472455	0.260221	NA	1.53739	-0.767304	-0.47083	0.068424	NA	NA	1.89093
YIL109C	P40482	SEC24	RBP	NA	-0.07166	-0.023908	0.101228	0.051969	NA	1.86511	-0.237082	-0.0459484	0.469269	0.468353	NA	1.47226	-0.594882	0.10311	NA	NA	NA	2.11932
YDR238C	P41810	SEC26	RBP	F1-F4	0.300436	0.197842	-0.442106	-0.281278	0.152772	-0.00228354	-0.587689	-0.259203	0.275264	0.431697	NA	-0.490921	-0.633289	-0.352497	-0.157213	-0.0892079	NA	0.0543424
YGL137W	P41811	SEC27	RBP	F1-F4	0.617965	0.242108	-0.391347	-0.193756	-0.372808	0.859274	-0.116644	-0.0558557	0.312419	-0.102348	NA	0.922324	-0.33199	-0.244049	-0.579904	-1.20853	NA	0.857968
YIL076W	P40509	SEC28	RBP	NA	0	NA	NA	NA	NA	-0.113293	NA	NA	NA	NA	NA	-0.275844	NA	NA	NA	NA	NA	-0.303279
YDL195W	P38968	SEC31	RBP	NA	-0.113303	-0.0593756	NA	0.315669	NA	1.51127	-0.578451	NA	NA	NA	NA	1.31939	NA	NA	NA	NA	NA	1.50662
YFL005W	P07560	SEC4	RBP	NA	-0.475623	-0.0811226	0.522444	0.0343017	NA	NA	NA	-0.103867	0.315613	NA	NA	-0.626225	NA	0.257201	NA	NA	NA	NA
YFL045C	P07283	SEC53	RBP	F1-F4	0.201954	0.315034	0.000284945	-0.36135	-0.155923	1.23689	-1.07882	-0.310462	-0.207027	-0.245381	-0.106791	1.27439	-0.916584	-0.389073	-0.0469686	-0.0284917	NA	0.976289
YDR170C	P11075	SEC7	RBP	NA	-1.77636e-15	NA	NA	NA	NA	0.788534	NA	NA	NA	NA	NA	1.07395	NA	NA	NA	NA	NA	1.37384
YOR184W	P33330	SER1	RBP	NA	1.09898	0.344765	0.262788	-0.282364	-1.35848	2.20066	0.0122546	0.322964	-0.990032	-1.23178	NA	2.29924	0.14282	-0.0474499	-0.506829	NA	NA	2.13227
YGR208W	P42941	SER2	NA	NA	0	NA	NA	NA	NA	0.0371197	NA	-0.601692	NA	NA	NA	0.00601123	NA	NA	NA	NA	NA	0.167426
YDR023W	P07284	SES1	RBP	F1-F4	0.29477	0.133759	-0.0870434	-0.113018	-0.228467	1.85834	-0.720943	-0.177155	-0.0674346	0.237173	0.473095	1.7165	-0.942086	-0.341579	-0.29133	-0.00746228	NA	1.32549
YDL168W	P32771	SFA1	NA	NA	-0.125667	0.173327	-0.242886	NA	0.234231	1.15685	NA	-0.335787	0.243102	NA	NA	0.766982	NA	0.0958921	NA	NA	NA	0.594973
YHR098C	P38810	SFB3	NA	NA	-1.18424e-15	NA	NA	NA	NA	1.14247	NA	NA	NA	NA	NA	1.24473	NA	NA	NA	NA	NA	1.11099
YJL145W	P47008	SFH5	NA	NA	0	NA	NA	NA	NA	0.337658	NA	NA	NA	NA	NA	0.495269	NA	NA	NA	NA	NA	1.34065
YOR021C	Q12314	SFM1	NA	NA	-0.0326308	0.0435077	NA	NA	NA	0.368874	NA	-0.384952	-0.184364	NA	NA	0.616275	NA	-0.111627	0.101698	NA	NA	0.222311
YOR007C	Q12118	SGT2	RBP	NA	-0.134307	0.134307	NA	NA	NA	0.518078	-1.08364	0.0253489	0.105606	NA	NA	0.414558	-0.409813	0.0563991	NA	NA	NA	0.0102035
YKR043C	P36136	SHB17	RBP	NA	0.258145	0.212715	-0.0661543	-0.440717	-0.0750568	1.76222	-1.22663	-0.560498	-0.319641	NA	NA	1.38668	-1.16235	-0.360859	0.232669	NA	NA	1.17459
YBR263W	P37292	SHM1	NA	F1-F4	0.345935	-0.349728	-0.281058	0.154955	0.129896	-1.85638	0.257423	-0.0588009	-0.741222	-0.866704	-1.77577	-2.0473	-0.640078	-0.929296	-1.35626	-1.47091	NA	-2.26647
YLR058C	P37291	SHM2	RBP	F1-F5	0.0859229	0.241285	-0.182495	-0.0627028	-0.0820092	1.54372	-0.416557	-0.171909	-0.0466116	-0.0533092	-0.513446	1.20133	-0.798656	-0.326774	-0.154236	-0.00475255	0.196544	1.29036
YBL058W	P34223	SHP1	NA	NA	8.88178e-16	NA	NA	NA	NA	0.406965	NA	-0.316301	NA	NA	NA	0.379882	NA	NA	NA	NA	NA	0.401943
YNL007C	P25294	SIS1	RBP	F1-F4	0.4862	0.0963094	-0.546207	-0.156121	0.159757	-1.11012	-0.987718	-0.932697	-0.282774	-0.743	NA	-1.57798	-0.745987	-0.476885	-0.0671385	-0.226831	NA	-1.39163
YLR398C	P35207	SKI2	RBP	NA	0.445965	0.3155	-0.687736	-0.451629	NA	-1.15627	-0.50952	-0.810681	-0.427821	-0.382143	NA	-1.79595	-0.915359	-0.678411	NA	NA	NA	-1.66403
YPR189W	P17883	SKI3	RBP	NA	0.879795	0.581228	-0.43157	-0.768893	-0.736906	-1.73712	-0.0402309	-0.567547	0.154359	-0.0232546	NA	-1.84284	-0.625926	-0.994829	-0.604032	NA	NA	-1.83267
YGL213C	Q02793	SKI8	NA	NA	1.77636e-15	NA	NA	NA	NA	NA	-0.482753	NA	NA	NA	NA	NA	-0.279405	NA	NA	NA	NA	NA
YDR515W	Q12034	SLF1	RBP	NA	NA	0	NA	NA	NA	NA	NA	NA	NA	NA	NA	NA	NA	NA	NA	NA	NA	NA
YGR271W	P53327	SLH1	RBP	NA	NA	NA	NA	1.77636e-15	NA	NA	NA	-0.569604	NA	0.147944	NA	NA	NA	NA	NA	NA	NA	-1.31414
YGR229C	P32566	SMI1	NA	NA	0	NA	NA	NA	NA	0.333637	NA	NA	NA	NA	NA	-0.225462	NA	NA	NA	NA	NA	0.272052
YDR510W	Q12306	SMT3	RBP	NA	0.62094	0.266273	0.0325124	-0.404148	-0.515577	-0.222262	NA	-0.359373	-0.851934	-1.00623	NA	-0.0674331	-0.762971	0.111845	0.00193545	NA	NA	-0.642325
YGL115W	P12904	SNF4	NA	NA	0	NA	NA	NA	NA	0.280245	NA	-0.531374	NA	NA	NA	0.50046	NA	NA	NA	NA	NA	0.584669
YJR104C	P00445	SOD1	RBP	F1-F5	0.443794	0.536744	-0.102585	-0.509826	-0.368126	-0.278316	-1.75802	-0.517801	-0.161157	-0.549179	-0.27508	0.0215202	-0.998554	-0.207686	-0.171047	0.0681429	-0.00915826	-0.324789
YHR008C	P00447	SOD2	NA	NA	0.129	-0.0906895	-0.121967	NA	NA	1.53808	-0.800155	-0.106072	-0.0539685	NA	NA	1.44808	-0.77362	-0.600891	NA	NA	NA	1.53321
YHR163W	P38858	SOL3	NA	F1-F4	0.457973	0.423129	-0.0394698	-0.801619	-0.50057	0.741475	-1.11598	-0.868134	-0.369691	-0.400239	NA	0.350883	-1.31542	-0.310364	-0.234287	0.955439	NA	0.919632
YCL054W	P25582	SPB1	NA	NA	0	NA	NA	NA	NA	NA	NA	NA	NA	NA	NA	NA	NA	NA	NA	NA	NA	NA
YKL184W	P08432	SPE1	NA	NA	0	NA	NA	NA	NA	0.962436	NA	NA	NA	NA	NA	0.699463	NA	NA	NA	NA	NA	0.523094
YPR069C	Q12074	SPE3	RBP	F1-F4	0.541799	0.21231	0.137892	-0.288624	-0.603377	1.33268	-1.02577	-0.278307	-0.365789	-1.04373	NA	1.19127	-0.648022	-0.1902	-0.249159	-0.130811	NA	1.21664
YEL031W	P39986	SPF1	RBP	NA	NA	NA	-0.0408907	0.0408907	NA	-1.53426	NA	0.673082	0.990378	0.974517	NA	-1.26564	0.0555445	0.624762	0.678774	NA	NA	NA
YGL207W	P32558	SPT16	RBP	NA	-0.072243	-0.0407906	NA	0.205672	NA	2.87078	-0.255648	0.231583	NA	NA	NA	2.49722	-0.371868	0.452283	NA	NA	NA	2.50654
YGR116W	P23615	SPT6	RBP	NA	1.18424e-15	NA	NA	NA	NA	0.78266	NA	NA	NA	NA	NA	1.26155	NA	NA	NA	NA	NA	0.873413
YIR012W	P35184	SQT1	NA	NA	0.0505449	-0.0673931	NA	NA	NA	1.49472	-0.119354	-0.369963	0.407089	NA	NA	1.52984	-0.419702	0.022607	NA	NA	NA	1.20269
YCL037C	P25567	SRO9	RBP	F1-F5	-0.404989	0.657794	-0.0319397	0.128554	-0.349418	-3.0098	-0.787349	-0.11909	-0.166047	-0.28554	-1.6389	-3.44027	-0.509737	0.231162	0.26243	-0.0512872	-2.07729	-3.15811
YNL189W	Q02821	SRP1	RBP	NA	1.77636e-15	NA	NA	NA	NA	0.519305	NA	NA	NA	NA	NA	0.694083	NA	NA	NA	NA	NA	0.876351
YPL243W	P38687	SRP68	RBP	NA	-1.18424e-15	NA	NA	NA	NA	-0.00618699	0.333224	0.118224	0.376627	NA	NA	-0.13283	0.308157	NA	NA	NA	NA	0.0759268
YNL138W	P17555	SRV2	RBP	NA	-0.0626654	0.0835539	NA	NA	NA	0.729116	NA	-0.0148098	0.149789	NA	NA	0.510114	-0.528956	NA	NA	NA	NA	0.704969
YAL005C	P10591	SSA1	RBP	F1-F5	0.200729	-0.0612349	-0.187405	-0.143857	0.191767	0.632589	-1.03245	-0.557136	-0.114544	0.115257	0.24091	0.180388	-0.949177	-0.652819	-0.187117	0.0272201	-0.0831844	0.375088
YLL024C	P10592	SSA2	RBP	F1-F5	0.0430895	0.102695	-0.127721	-0.132828	0.114764	0.599443	-0.902559	-0.445467	-0.0111006	0.132604	0.147303	0.46072	-1.0402	-0.368788	-0.346455	0.172325	-0.000190323	0.320793
YDL229W	P11484	SSB1	RBP	F1-F5	-0.807241	-0.100044	0.178574	0.300297	0.428415	-1.50465	-1.1927	-1.11772	-0.575442	-0.239283	-0.483307	-1.48343	-0.997406	-0.434179	-0.211035	-0.0616849	-1.00984	-1.35639
YNL209W	P40150	SSB2	RBP	F1-F5	-0.988234	-0.0907368	0.164405	0.410747	0.503818	-1.98676	-1.0178	-0.921118	-0.148807	0.153631	-0.228003	-2.15202	-1.29166	-0.407772	0.218763	0.282881	-0.693185	-1.8768
YJR045C;YEL030W	P0CS90;P39987	SSC1;ECM10	RBP	F1-F5	0.117201	0.287694	-0.100396	-0.230217	-0.0742808	1.25649	-1.01701	-0.433597	-0.00734498	0.0778151	-0.018165	1.11484	-1.24481	-0.553272	-0.39502	-0.188984	-0.581831	0.794572
YDR293C	P24276	SSD1	RBP	NA	-0.664873	-0.0459809	0.360075	0.433778	0.0140385	-1.8406	-0.133995	0.132487	0.347804	0.500501	NA	-2.07632	-0.343502	-0.0543889	-0.0117329	NA	NA	-2.09896
YPL106C	P32589	SSE1	RBP	F1-F5	0.264151	0.143449	-0.267782	-0.0194284	-0.12039	1.98699	-0.763649	-0.0474042	0.0769293	0.13976	0.0683721	1.87115	-0.642928	-0.114648	-0.0339178	-0.106107	-0.38822	1.91454
YBR283C	P38353	SSH1	RBP	NA	0	NA	NA	NA	NA	-1.00255	-0.0466805	1.32422	1.09698	NA	NA	-0.435825	0.550642	1.05733	1.65676	NA	NA	-0.384456
YHR064C	P38788	SSZ1	RBP	F1-F5	0.594299	0.553595	0.482223	-0.0501575	-1.57996	-2.18373	1.50661	0.0157768	-1.0748	-1.93346	-2.39329	-2.16443	1.49218	-0.120274	-1.06149	-1.95768	-2.61443	-2.0191
YOR212W	P18851	STE4	NA	NA	1.18424e-15	NA	NA	NA	NA	NA	NA	NA	NA	NA	NA	NA	NA	NA	NA	NA	NA	NA
YOR027W	P15705	STI1	RBP	F1-F4	0.0813621	0.170052	0.0550649	-0.160809	-0.145671	1.0561	-1.62203	-0.338117	0.00160505	0.157877	0.162424	1.12866	-1.68441	-0.660963	-0.666258	-0.287469	NA	1.14272
YLR150W	P39015	STM1	RBP	F1-F5	0.160105	-0.271074	-0.20256	0.179029	0.134499	-3.54095	1.78667	0.334844	-1.50721	-2.36361	-2.35832	-3.62855	2.56864	0.399996	-0.811563	-1.27448	-1.61029	-3.38526
YMR125W	P34160	STO1	RBP	NA	1.18424e-15	NA	NA	NA	NA	0.307846	NA	NA	NA	NA	NA	0.224563	NA	NA	NA	NA	NA	0.381
YMR054W	P37296	STV1	NA	NA	0.498243	-0.502565	-0.242638	NA	NA	NA	-0.662221	-0.540827	NA	NA	NA	NA	-0.0297879	-0.212598	NA	NA	NA	NA
YDL084W	Q07478	SUB2	RBP	F1-F4	0.498576	0.21134	-0.0651581	-0.327577	-0.31718	1.34385	-0.0894393	-0.049861	0.080033	0.0663698	0.8573	1.57953	-0.173037	0.0288781	0.097863	0.510251	NA	1.61913
YNL244C	P32911	SUI1	RBP	NA	0.22463	NA	NA	-0.22463	NA	NA	NA	NA	NA	NA	NA	NA	0.303372	0.399388	-0.406693	NA	NA	NA
YJR007W	P20459	SUI2	TF	F1-F4	0.569686	0.199919	-0.118965	-0.33926	-0.31138	-0.765468	-0.684279	-0.571144	-0.666343	-0.805187	NA	-0.806928	-0.993859	-0.555059	-0.382524	-0.986661	NA	-1.14613
YPL237W	P09064	SUI3	TF	F1-F4	0.253599	0.409377	0.0245958	-0.20202	-0.485552	-1.90555	0.557153	-0.314064	-0.211831	-0.646654	NA	-1.65022	0.555592	-0.192968	-0.275504	-0.243403	NA	-2.02495
YDR172W	P05453	SUP35	TF	NA	-0.424444	0.12836	0.163233	0.0525221	0.121137	-0.342999	-0.485616	0.216321	0.286612	0.0385351	NA	-0.48891	-0.976261	-0.408395	-0.070751	NA	NA	-0.256939
YBR143C	P12385	SUP45	TF	F1-F4	-0.676509	0.181076	0.0942473	0.270098	0.131087	-1.21291	-0.863382	-0.546437	-0.358498	-0.499507	NA	-1.45217	-1.15052	-0.47591	-0.204671	-0.227196	NA	-1.458
YDR346C	Q05515	SVF1	NA	NA	0	NA	NA	NA	NA	0.801167	-0.349091	NA	NA	NA	NA	0.874174	NA	NA	NA	NA	NA	0.572717
YDR395W	Q04175	SXM1	RBP	NA	-0.098279	-0.0426624	0.297333	-0.0367814	NA	2.68218	-0.741454	-0.334649	NA	NA	NA	2.57714	NA	NA	NA	NA	NA	2.35516
YPL105C	Q02875	SYH1	RBP	NA	NA	-1.02078	-0.405379	0.162199	0.753571	NA	NA	NA	-0.537257	1.88162	2.31244	NA	NA	-0.955729	0.510807	0.721941	NA	NA
YLR354C;YGR043C	P15019;P53228	TAL1;NQM1	RBP	F1-F5	0.335396	0.329915	-0.165817	-0.297803	-0.201691	1.13149	-1.73282	-0.421808	-0.33026	-0.350777	-0.43862	1.21897	-1.34503	-0.41497	-0.350362	-0.0920454	-1.29059	0.819247
YDR212W	P12612	TCP1	RBP	NA	-0.0792318	0.141694	-0.105334	-0.0101911	0.0267293	0.254676	-0.993144	-0.24513	0.286948	0.381921	NA	0.463264	-1.20789	-0.109981	0.103383	NA	NA	0.357275
YJL052W	P00360	TDH1	RBP	F1-F4	0.371718	0.263928	0.00294278	-0.469279	-0.136789	1.62302	-1.05931	-0.100823	-0.468249	-0.179587	NA	2.0866	-0.68615	-0.807345	-0.481273	0.95945	NA	2.43973
YJR009C	P00358	TDH2	RBP	F1-F4	0.895117	0.177043	-0.110008	-0.225441	-0.719953	2.60811	0.643683	0.627871	0.201309	0.316783	NA	2.57738	-0.12249	-0.517349	-0.313461	0.609059	NA	2.2791
YGR192C	P00359	TDH3	RBP	NA	1.57616	-0.165387	0.00717896	0.0354232	-1.93544	2.99371	1.38624	0.870082	-0.949315	-2.05791	NA	3.08912	1.03933	-0.14512	-1.33268	NA	NA	2.64645
YBR118W	P02994	TEF2	TF	F1-F5	0.375177	0.0868879	-0.22213	0.00461664	-0.244551	0.969627	0.590783	-0.147135	-0.504356	-0.517768	-0.796071	0.545567	0.25194	-0.359047	-0.50697	-0.484836	-1.33201	0.804924
YKL081W	P36008	TEF4	TF	F1-F5	0.646603	0.286093	-0.108405	-0.270382	-0.553908	1.07776	-0.450296	-0.0577124	-0.00757875	-0.24012	-0.0957804	0.859984	-0.287247	0.121076	-0.112788	0.0464169	-0.556611	0.780735
YHR025W	P17423	THR1	RBP	F1-F4	0.471575	0.0970645	0.0800066	-0.227231	-0.421415	1.53297	-1.44686	-0.509406	-0.284324	-0.169775	NA	1.59729	-1.40522	-0.06261	-0.330293	0.0256165	NA	1.3365
YCR053W	P16120	THR4	RBP	F1-F5	0.676635	0.357579	-0.132368	-0.45977	-0.442076	1.75654	-1.01073	-0.341103	-0.208576	-0.162825	-0.350883	1.66981	-0.63684	-0.234927	-0.0778855	-0.0774573	-0.372385	1.42434
YIL078W	P04801	THS1	RBP	F1-F5	0.129995	0.795505	-0.041705	-0.540399	-0.343395	0.937957	-0.612036	0.212918	-0.0760825	-0.126536	-0.327299	0.7891	-0.68231	0.19637	-0.232457	-0.102216	-0.42603	0.797225
YMR260C	P38912	TIF11	TF	NA	-0.208374	0.241096	-0.1427	-0.0397114	0.208173	-0.422653	-0.596015	-0.329546	-0.193969	NA	NA	-0.165689	-0.177702	NA	0.129062	NA	NA	NA
YJL138C	P10081	TIF2	TF	F1-F5	0.0673864	0.183696	0.0748374	-0.240283	-0.0856372	0.88879	-0.984904	-0.384225	-0.0750879	-0.0493354	0.108116	0.889604	-0.935064	-0.1112	0.125197	0.278111	0.0131392	0.790053
YPR163C	P34167	TIF3	TF	F1-F4	-0.745501	0.131189	0.0968312	0.184141	0.33334	-1.16583	-1.10115	-0.7831	-0.534734	-0.35277	0.909615	-1.20174	-0.85896	-0.289248	-0.171024	-0.120498	NA	-1.46225
YMR146C	P40217	TIF34	TF	F1-F4	-0.266135	0.295542	0.205217	0.043831	-0.278455	-1.39104	-0.521816	-0.510455	-0.657668	-0.814112	NA	-1.49806	-1.01255	-0.71643	-0.581224	-0.874613	NA	-1.43487
YDR429C	Q04067	TIF35	TF	F1-F4	-0.456049	0.229337	0.23991	0.121323	-0.134521	-1.90752	-1.18603	-0.600638	-0.599193	-0.620399	-0.483532	-1.97173	-1.36117	-0.447379	-0.238796	-0.328453	NA	-1.95237
YGR162W	P39935	TIF4631	TF	F1-F4	-0.613692	0.988527	0.28203	0.062363	-0.719229	-2.54948	-1.70489	-1.40595	-0.867837	-1.02289	NA	-2.38187	-0.775608	0.0379478	-0.0140939	-0.0671814	NA	-2.46388
YGL049C	P39936	TIF4632	TF	NA	-1.18424e-15	NA	NA	NA	NA	NA	NA	0.162204	NA	NA	NA	NA	-0.358238	NA	NA	NA	NA	NA
YPR041W	P38431	TIF5	TF	F1-F4	-0.512032	0.287765	0.380172	0.0562509	-0.212156	-1.09893	-1.60765	-1.51654	-0.983258	-0.658399	-0.353252	-1.37401	-1.38722	-1.18839	-0.65753	-0.757281	NA	-1.15364
YPR016C	Q12522	TIF6	TF	NA	1.44362	-0.121571	-1.32205	NA	NA	-1.65099	0.190494	-0.833129	-1.39569	-1.30098	NA	-2.17057	-0.244134	-0.490065	-0.74875	NA	NA	-1.91342
YPR074C	P23254	TKL1	RBP	F1-F4	0.603192	-0.124022	0.176013	-0.297615	-0.313564	2.80594	-0.609559	-0.207047	-0.268173	-0.548673	-0.697149	2.46783	-0.725196	-0.519058	-0.707697	-1.70644	NA	2.57953
YIL137C	P40462	TMA108	NA	F1-F4	-0.313631	-0.0776092	-0.123183	0.252823	0.230804	0.176783	-0.22601	-0.258864	0.0337943	0.118617	NA	0.046552	-1.08739	-0.433619	-0.304395	-0.0434992	NA	-0.103164
YOR252W	Q08687	TMA16	NA	NA	0	NA	NA	NA	NA	NA	0.39151	-0.512772	NA	NA	NA	NA	0.44311	NA	NA	NA	NA	NA
YKL056C	P35691	TMA19	RBP	F1-F4	0.669507	0.265135	-0.129241	-0.196689	-0.608713	0.465448	-0.580297	-0.113623	-0.393767	-0.53857	NA	0.503997	-0.203487	0.142001	-0.219387	-0.578124	NA	0.206721
YOR091W	Q12000	TMA46	RBP	F1-F4	-1.17191	0.271938	-0.0511978	0.711413	0.226956	NA	-1.21429	0.468892	0.49433	0.360119	NA	NA	-0.822807	0.34961	0.768766	0.339464	NA	NA
YDR117C	Q04600	TMA64	RBP	NA	-0.613478	-0.101768	0.00112444	0.735909	-0.0326795	-1.34406	NA	-0.442631	-0.165833	NA	NA	-1.75246	-0.700571	-0.261796	-0.207658	NA	NA	-1.47367
YER049W	P40032	TPA1	RBP	NA	0	NA	NA	NA	NA	1.65933	-0.00285149	NA	NA	NA	NA	1.26809	-0.24138	NA	NA	NA	NA	1.35722
YDR050C	P00942	TPI1	RBP	F1-F5	0.633978	0.251349	-0.165883	-0.217491	-0.501952	1.09975	-0.897912	-0.195521	-0.456562	-0.79165	-0.333319	1.18376	-0.596001	-0.107929	-0.392079	-0.483183	-0.307843	0.931217
YBR126C	Q00764	TPS1	RBP	F1-F4	-0.204216	0.0457388	-0.00829154	-0.129249	0.296017	1.4393	-0.910348	-0.306806	0.464072	0.615947	NA	1.44538	-1.4257	-0.209466	0.080721	0.32316	NA	1.20879
YDR074W	P31688	TPS2	RBP	NA	-0.646018	NA	NA	NA	1.29204	1.31083	0.293694	NA	0.247912	0.832414	NA	0.977668	-0.544661	NA	NA	NA	NA	1.3069
YMR261C	P38426	TPS3	RBP	NA	-0.117449	0.234898	NA	NA	NA	0.970122	-0.438259	-0.384467	NA	NA	NA	1.08133	NA	NA	NA	NA	NA	0.846663
YDR120C	P15565	TRM1	RBP	NA	0.158789	-0.238183	NA	NA	NA	NA	-0.243293	0.397228	NA	NA	NA	NA	-0.0743849	NA	NA	NA	NA	NA
YDL201W	Q12009	TRM8	NA	NA	0.123208	-0.164278	NA	NA	NA	0.47907	-0.290992	NA	NA	NA	NA	0.0570394	NA	NA	NA	NA	NA	0.184065
YDR165W	Q03774	TRM82	NA	NA	1.18424e-15	NA	NA	NA	NA	0.770964	-0.316099	NA	NA	NA	NA	0.822301	-0.856296	NA	NA	NA	NA	0.676688
YER090W	P00899	TRP2	RBP	NA	0.0800017	0.20416	-0.349996	0.0466745	-0.192226	1.8828	-0.5655	-0.729551	0.243573	-0.120019	NA	1.60285	-1.6529	-0.706287	-0.163667	NA	NA	1.78009
YKL211C	P00937	TRP3	NA	NA	-0.0607232	0.312315	NA	-0.142409	0.0151632	1.87777	-1.03591	-0.648885	-0.0250713	0.157518	NA	1.61228	-1.36899	-0.523995	0.253733	0.283221	NA	1.62388
YGL026C	P00931	TRP5	RBP	F1-F4	0.146084	0.165406	0.00682451	0.00441544	-0.321023	1.88123	-0.939651	-0.144811	-0.110743	0.47252	-0.736589	1.95091	-0.931505	-0.719297	-0.431854	-0.274837	NA	1.78048
YDR353W;YHR106W	P29509;P38816	TRR1;TRR2	RBP	F1-F4	0.427006	0.314778	-0.0198825	-0.471085	-0.250816	1.10834	-1.35281	-0.183741	0.0363384	0.0329702	-0.112479	1.32425	-0.819929	-0.111149	-0.16307	0.282757	NA	1.29628
YDR472W	Q03337	TRS31	NA	NA	0.0662283	-0.0993424	NA	NA	NA	NA	NA	NA	NA	NA	NA	NA	0.0245978	0.0545214	NA	NA	NA	NA
YOR115C	Q99394	TRS33	NA	NA	-1.18424e-15	NA	NA	NA	NA	NA	NA	NA	NA	NA	NA	NA	NA	NA	NA	NA	NA	NA
YLR043C	P22217	TRX1	RBP	NA	0.166779	-0.131869	0.0870388	-0.394494	0.391363	0.292891	NA	-0.533759	-0.402146	NA	NA	0.369398	-0.495563	-0.00434997	0.0664556	NA	NA	0.136337
YGR209C	P22803	TRX2	RBP	F1-F4	0.15578	0.246044	0.195401	-0.436251	-0.160975	0.00118077	-1.31844	-0.147732	0.243104	0.139728	NA	0.131666	-0.907187	-0.334867	-0.082639	0.517912	0.840905	0.192262
YML028W;YDR453C	P34760;Q04120	TSA1;TSA2	RBP	F1-F5	0.258436	0.0883816	0.159602	-0.129031	-0.377388	1.28835	-0.920039	-0.164351	-0.416747	-0.215694	-0.227592	1.16705	-0.879356	-0.291434	-0.078538	-0.35478	-0.158992	0.951315
YML100W	P38427	TSL1	RBP	NA	-0.458944	0.24288	-0.0883154	NA	0.641883	0.868967	NA	-0.0610106	NA	NA	NA	0.776037	NA	0.380473	NA	NA	NA	0.513613
YDL060W	Q07381	TSR1	RBP	NA	0.0981364	-0.130849	NA	NA	NA	-0.691084	-0.119549	-0.452517	NA	NA	NA	-0.788076	-0.0518765	NA	NA	NA	NA	-0.767199
YML085C	P09733	TUB1	RBP	NA	NA	0	NA	NA	NA	0.478925	NA	-0.0428251	NA	NA	NA	0.30905	-0.0644738	NA	NA	NA	NA	0.910113
YFL037W	P02557	TUB2	RBP	F1-F4	-0.172106	-0.173887	-0.00737044	0.0544262	0.298938	0.576309	0.00597679	0.059252	0.362232	0.601246	NA	0.444422	-0.88433	-0.296594	0.102405	0.0171603	NA	0.221938
YOR187W	P02992	TUF1	RBP	NA	-0.339206	0.423276	-0.204408	NA	0.233406	0.134121	-0.224849	NA	0.398935	NA	NA	-0.111797	-0.738493	NA	0.407214	NA	NA	0.201438
YOR251C	Q08686	TUM1	RBP	NA	-1.77636e-15	NA	NA	NA	NA	0.258242	NA	NA	NA	NA	NA	0.271558	NA	NA	NA	NA	NA	-0.1392
YMR071C	Q04767	TVP18	NA	NA	0.0997121	0.181561	-0.380985	NA	NA	NA	-1.29398	-0.221706	NA	NA	NA	NA	-0.759705	-0.226262	NA	NA	NA	NA
YGR185C	P36421	TYS1	RBP	F1-F4	0.390372	0.626157	0.265747	-0.380806	-0.901471	1.13305	-0.215536	0.624007	0.379383	-0.548867	NA	1.02749	-0.378656	0.907739	0.69611	-0.671165	NA	0.75913
YKL210W	P22515	UBA1	RBP	F1-F4	0.174749	0.155977	-0.0319179	-0.229483	-0.0773044	2.40719	-0.56248	-0.445119	0.155104	0.230978	NA	2.46374	-1.40422	-1.71938	-2.46777	-0.717832	NA	2.27145
YLR167W;YIL148W;YKR094C;YLL039C	P05759;P0CH09;P0CH08;P0CG63	Ubiquitin	NA	F1-F5	-0.226925	-0.160742	-0.0228147	0.173452	0.23703	-1.7329	0.102372	-0.372359	-0.545439	-0.730417	-1.38564	-1.89597	0.817763	0.363362	0.623222	-0.0077962	-1.11493	-1.793
YER151C	Q01477	UBP3	RBP	F1-F4	-2.39745	-1.35875	-0.0552676	1.35545	1.25729	-3.35184	-2.44778	-0.700434	1.01936	1.41274	NA	-3.74246	-2.85974	-0.44557	0.977019	1.37612	NA	-3.28198
YFR010W	P43593	UBP6	RBP	NA	0	NA	NA	NA	NA	1.07108	-0.317099	-0.148084	NA	NA	NA	0.624013	0.13285	NA	NA	NA	NA	0.954841
YGR019W	P17649	UGA1	NA	NA	1.77636e-15	NA	NA	NA	NA	1.2878	NA	NA	NA	NA	NA	0.947314	NA	NA	NA	NA	NA	0.615965
YKL035W	P32861	UGP1	RBP	F1-F4	0.0928639	0.114208	-0.0294083	-0.198624	0.0209611	0.839972	-0.505352	-0.0783851	0.0307426	0.291239	0.0887724	0.650077	-1.16595	-0.424157	-0.267148	-0.238545	NA	0.768323
YKL216W	P28272	URA1	NA	F1-F4	0.190373	0.251702	0.0714056	-0.0663811	-0.596133	1.5803	-0.485795	-0.0289467	-0.13489	-0.550823	0.170116	1.62078	-0.102755	0.363989	-0.133458	-0.376957	NA	1.55298
YJL130C	P07259	URA2	RBP	F1-F5	0.0549195	0.0885272	-0.21199	0.0026808	0.0658625	1.38831	-0.35214	-0.0679331	0.461834	0.657109	-0.260078	1.52067	-0.933228	-0.495067	-0.0487728	0.107424	-0.647937	1.48652
YLR420W	P20051	URA4	NA	NA	0.726899	-0.363173	-0.909039	NA	NA	1.58299	0.0816782	-0.623106	NA	NA	NA	1.43377	0.169395	-0.227384	NA	NA	NA	1.56601
YML106W;YMR271C	P13298;P30402	URA5;URA10	RBP	F1-F4	0.376555	0.0883745	0.045636	-0.587946	0.154762	1.2047	-1.31486	-0.409424	-0.505807	-0.22097	NA	1.27493	-1.10407	-0.515633	-0.214063	-0.427549	NA	1.11066
YKL024C	P15700	URA6	NA	NA	0.0670375	-0.0893834	NA	NA	NA	1.25674	-0.905379	-0.438644	NA	NA	NA	1.56357	-0.101179	-0.323508	-0.229651	NA	NA	1.2818
YBL039C	P28274	URA7	RBP	F1-F4	-0.503194	-0.133972	-0.18085	0.248519	0.524285	1.10115	-0.112816	0.059643	1.03926	1.32683	NA	1.24848	-0.700405	-0.193788	0.227275	0.356377	NA	1.27707
YEL013W	P39968	VAC8	NA	NA	-0.248189	0.156327	-0.00956625	0.12886	NA	NA	NA	0.300306	1.09303	1.20362	NA	NA	-0.637634	0.241277	0.553306	NA	NA	NA
YGR094W	P07806	VAS1	RBP	F1-F5	-0.035351	0.168478	-0.120471	-0.0844414	0.0717856	1.73117	-1.21135	-0.667655	0.0696506	-0.141763	-0.865703	1.87673	-1.46011	-0.613636	-0.212146	0.0114431	-0.481117	1.74393
YDL185W	P17255	VMA1	RBP	F1-F5	0.0577058	0.16796	-0.00596471	-0.255446	0.0357451	1.16568	-1.02259	-0.28328	0.085939	0.361464	0.540236	0.913638	-1.18234	-0.206677	0.0863595	0.295224	0.387228	0.935559
YPR036W	P41807	VMA13	RBP	NA	0.205759	0.109284	-0.0754458	-0.0488124	-0.243101	0.721376	-1.03677	0.248075	-0.00126627	0.249043	NA	0.130844	-1.01198	0.108936	-0.0534848	NA	NA	0.127418
YBR127C	P16140	VMA2	RBP	F1-F5	0.14875	0.107513	0.0396713	-0.16699	-0.128945	1.04172	-1.02166	-0.0453873	0.182227	0.134805	-0.000660772	0.702617	-1.087	-0.12687	0.195549	0.113888	-0.469141	0.748285
YKL080W	P31412	VMA5	RBP	F1-F4	0.361679	0.301449	0.018197	-0.220732	-0.614125	0.561702	-0.926385	0.00435328	-0.106681	-0.209847	NA	0.172598	-0.792442	-0.0457659	0.215961	-0.0201472	NA	0.145086
YLR447C	P32366	VMA6	RBP	NA	0.609845	-0.461838	-0.526933	NA	NA	-1.04754	-0.480144	-0.761488	-0.481474	-0.302567	NA	-1.40774	NA	-0.56175	-0.328006	NA	NA	-1.13442
YEL051W	P32610	VMA8	RBP	NA	0	NA	NA	NA	NA	0.765688	0.318257	-0.115343	NA	NA	NA	0.783853	0.12903	NA	NA	NA	NA	0.459548
YOR270C	P32563	VPH1	RBP	F1-F4	0.477932	0.220524	-0.241071	-0.140722	-0.502574	-2.08696	-1.21047	0.587558	1.11414	0.691912	NA	-1.83937	-0.991254	0.268233	0.293591	0.805976	NA	-1.84032
YKR001C	P21576	VPS1	RBP	F1-F4	0.671533	0.625841	-0.128085	-0.457136	-0.712153	-0.909561	0.444791	1.20475	0.893801	0.363763	NA	-0.979286	-0.132344	0.176478	-0.0305225	-0.58038	NA	-0.933943
YOR089C	P36017	VPS21	RBP	NA	1.18424e-15	NA	NA	NA	NA	-0.422085	NA	NA	NA	NA	NA	NA	NA	NA	NA	NA	NA	NA
YOL097C	Q12109	WRS1	RBP	NA	0.244975	0.343351	-0.281192	-0.571307	0.0510477	1.91014	-0.899984	-0.3863	-0.319989	0.147654	NA	1.77456	-1.20823	-0.428847	0.719144	NA	NA	1.60978
YOR230W	Q12363	WTM1	RBP	F1-F4	0.569088	0.203741	-0.348785	-0.298279	-0.283948	2.21723	-1.01196	-0.263637	0.102486	0.515417	NA	2.37888	-1.02485	-0.235406	0.112527	0.954594	NA	2.25975
YGL173C	P22147	XRN1	RBP	F1-F4	-0.981934	0.269958	0.162683	0.269456	0.279837	-2.40833	-1.45763	-0.501089	0.447636	0.187474	-0.674364	-2.32928	-1.41653	-0.0689586	0.336313	-0.0379409	NA	-2.4998
YBL036C	P38197	YBL036C	NA	NA	0.12246	-0.0592402	-0.185681	NA	NA	1.48437	NA	-0.10966	NA	NA	NA	1.35355	-0.541307	NA	NA	NA	NA	1.13185
YCR090C	P25654	YCR090C	RBP	NA	NA	NA	1.77636e-15	NA	NA	NA	-0.179496	NA	NA	NA	NA	NA	NA	NA	NA	NA	NA	NA
YNL064C	P25491	YDJ1	RBP	F1-F4	-0.0541838	-0.0058372	-0.185538	-0.0435716	0.28913	-0.440565	0.0138419	0.264143	0.21357	0.497993	NA	-0.476558	-0.460995	-0.317175	-0.0939094	-0.147455	NA	-0.337195
YDL124W	Q07551	YDL124W	RBP	F1-F4	0.73767	0.398397	0.118283	-0.682681	-0.542099	1.0256	-1.03382	-0.154038	-0.228089	-0.397876	NA	0.978757	-0.715184	-0.132019	-0.0557339	-0.627967	NA	0.781897
YDR341C;YHR091C	Q05506;P38714	YDR341C;MSR1	RBP	F1-F4	0.0101845	0.157815	0.159353	-0.100528	-0.226825	2.17408	-1.48529	-0.49487	0.0811974	0.0241374	-0.396685	2.20143	-1.72256	-0.463381	-0.0827279	-0.376514	NA	2.09668
YLR249W	P16521	YEF3	TF	F1-F5	-0.413253	-0.163623	-0.155428	0.338542	0.393762	0.165602	0.325088	-0.518949	-0.135776	0.0290278	-0.900016	0.021014	0.047019	-0.531017	-0.255282	-0.235305	-1.8835	0.0991718
YEL025C	P39991	YEL025C	NA	F1-F4	-0.23181	-0.181507	0.268427	0.294743	0.0253396	NA	0.326198	0.59799	0.644618	0.672462	NA	NA	-0.0797055	0.852088	0.955347	1.08843	NA	NA
YER156C	P40093	YER156C	RBP	NA	0.187977	0.0814751	-0.108731	-0.410419	0.23982	1.64513	-1.25468	-0.670771	-0.330321	-0.6907	NA	1.57294	-0.886322	-0.417261	-0.0815327	NA	NA	1.70881
YGR054W	P53235	YGR054W	RBP	F1-F4	-0.773746	0.209075	0.176537	0.600307	-0.212173	-2.15102	0.265069	0.317669	0.137341	-0.313705	NA	-2.28814	0.0551181	0.0142145	0.0177941	-1.58762	NA	-2.19565
YGR234W	P39676	YHB1	RBP	F1-F4	0.343908	0.498156	-0.000571822	-0.630111	-0.211382	0.860085	-1.56321	-0.420344	-0.477773	-0.518571	NA	1.04839	-1.31153	-0.209354	-0.271149	-0.0352098	NA	0.812741
YHR020W	P38708	YHR020W	RBP	F1-F4	-0.0857315	0.277337	-0.136956	0.0200391	-0.0746879	1.8984	-0.679546	-0.329485	0.19191	0.120463	-0.286192	1.9165	-1.16326	-0.447381	-0.245109	-0.0986871	NA	1.75036
YNL263C	P53845	YIF1	RBP	NA	-1.18424e-15	NA	NA	NA	NA	NA	-1.37513	NA	NA	NA	NA	NA	-1.34924	NA	NA	NA	NA	NA
YNL044W	P53633	YIP3	NA	NA	0.161863	-0.0798599	-0.32034	0.116404	NA	0.207633	0.0603665	0.201958	0.724143	NA	NA	-0.00672319	0.0784726	-0.208952	0.814777	NA	NA	-0.146968
YKL196C	P36015	YKT6	RBP	NA	-8.88178e-16	NA	NA	NA	NA	0.178512	NA	NA	NA	NA	NA	0.362617	NA	NA	NA	NA	NA	0.182795
YLR179C	Q06252	YLR179C	RBP	F1-F4	0.526068	0.645204	-0.157016	-0.737646	-0.276611	0.794894	-1.27045	-0.664587	-0.43663	-1.01831	NA	0.808859	-0.942131	-0.101854	-0.0657984	-0.27608	NA	0.42982
YLR419W	Q06698	YLR419W	RBP	NA	-0.284506	0.057994	0.226512	NA	NA	NA	0.0672372	0.396159	1.16488	1.35572	NA	NA	NA	0.354797	0.858098	NA	NA	NA
YMR027W	Q04371	YMR027W	NA	NA	-0.0341218	0.152304	NA	-0.160213	NA	1.39932	-0.559789	-0.304404	NA	NA	NA	1.21157	NA	NA	NA	NA	NA	1.3745
YMR045C;YBL005W-B;YMR046C;YBL005W-A;YDR170W-A	Q04214;Q12490;Q04215;Q12266;Q03964	YMR045C;YBL005W-B;YMR046C;YBL005W-A;YDR170W-A;	NA	NA	NA	NA	NA	-0.0194749	0.0292124	NA	NA	NA	NA	1.60842	NA	NA	NA	NA	-0.338617	0.990017	NA	NA
YMR099C	Q03161	YMR099C	RBP	F1-F4	0.96526	0.528451	-0.0335485	-0.731543	-0.737007	1.41018	-1.14347	0.151249	-0.358274	-0.974177	NA	1.25839	-0.610125	-0.183266	-0.218186	-1.10856	NA	0.904293
YMR178W	Q03219	YMR178W	RBP	NA	0	NA	NA	NA	NA	-0.299804	NA	NA	NA	NA	NA	-0.13721	NA	NA	NA	NA	NA	-0.258373
YMR226C	Q05016	YMR226C	RBP	F1-F4	0.519973	0.126348	-0.0121511	-0.424948	-0.21226	1.55345	-1.6752	-0.754579	-0.217786	0.211236	1.04978	1.6993	-1.95396	-1.01099	-0.0323879	0.439503	NA	1.52411
YMR315W	Q04869	YMR315W	RBP	NA	0.328893	0.330568	-0.166345	-0.292417	-0.48457	1.11797	-0.615664	-0.385442	0.326414	NA	NA	1.01473	-0.634801	-0.343329	0.229423	NA	NA	1.07968
YKL067W	P36010	YNK1	RBP	NA	-0.0772937	0.412908	0.0642986	-0.171424	-0.424828	0.570896	-1.38352	-0.59948	-0.361958	-0.225566	NA	0.595837	-1.31711	-0.909903	-0.411629	NA	NA	0.447595
YNL010W	P53981	YNL010W	RBP	NA	0.0428754	-0.0437817	-0.0468415	0.0736048	NA	-0.0168395	-0.96876	-0.591355	-0.152843	NA	NA	0.563817	-0.979874	-0.33876	-0.544606	NA	NA	0.131116
YNL134C;YCR102C;YLR460C	P53912;P25608;P54007	YNL134C;YCR102C;YLR460C	RBP	F1-F4	0.848561	0.49145	-0.139701	-0.449919	-0.75039	1.69601	-0.420123	0.271513	-0.00706991	-0.400005	NA	1.64329	-0.16943	0.208159	-0.359014	-0.138527	NA	1.66066
YNL247W	P53852	YNL247W	RBP	NA	0.13766	0.277582	0.0172745	-0.0643826	-0.363815	3.27611	-0.601582	-0.15709	-0.169206	0.0275589	NA	3.1777	-0.960723	-0.715703	-0.4799	NA	NA	2.7382
YOL057W	Q08225	YOL057W	NA	NA	0.00953964	-0.0190793	NA	NA	NA	1.22578	NA	-0.133582	NA	NA	NA	1.5862	NA	NA	NA	NA	NA	1.12803
YOL103W-B;YOL103W-A	Q12273;Q92392	YOL103W-B;YOL103W-A	NA	NA	NA	NA	NA	-0.00514741	0.00514741	NA	NA	NA	-0.212465	2.17115	NA	NA	NA	NA	-0.0467005	1.0997	NA	NA
YPR028W	Q12402	YOP1	NA	NA	-0.402876	NA	0.0906321	0.312244	NA	NA	-0.566652	0.817144	1.38363	NA	NA	NA	-0.06658	1.19231	NA	NA	NA	NA
YPL225W	Q08971	YPL225W	RBP	F1-F4	-0.311062	-0.542017	0.0397868	0.318682	0.504557	0.576875	-1.31881	-0.94738	-0.944625	-0.881153	NA	0.569488	-1.23101	-1.06002	-0.149625	-0.369004	NA	0.621107
YDR368W	Q12458	YPR1	NA	NA	0.62978	0.331677	-0.107907	-0.677438	-0.270786	0.934116	-0.873229	-0.345941	-0.390426	NA	NA	0.635504	-0.578144	-0.102798	-0.106271	-0.489088	NA	0.491621
YFL038C	P01123	YPT1	RBP	F1-F4	1.15427	0.375378	0.133146	-0.725207	-1.25012	-0.915379	-0.728137	0.0146902	-0.442388	-0.540471	NA	-1.09383	-0.148821	-0.138813	-0.393993	-0.849421	NA	-0.793796
YER031C;YGL210W	P38555;P51996	YPT31;YPT32	RBP	NA	-0.137963	0.0459859	0.312914	-0.192113	-0.0576484	-0.620575	-1.20847	-0.109774	-0.11985	NA	NA	-0.544371	-1.03595	0.0947183	-0.0918352	0.220926	NA	-0.507478
YML001W	P32939	YPT7	NA	NA	-0.233164	0.163659	0.0493473	-0.194251	0.285879	-1.23006	NA	-0.196411	0.554984	0.826864	NA	-0.862424	NA	0.302211	0.798271	NA	NA	-0.426279
YDR381W	Q12159	YRA1	RBP	F1-F4	0.553674	0.209297	-0.368127	0.0745468	-0.469392	-2.98212	0.736377	0.208829	-0.0145842	-0.502831	NA	-3.03103	0.00277565	-0.0418084	-0.165726	-0.761606	NA	-2.78399
YDR002W	P41920	YRB1	RBP	NA	0.120773	-0.181159	NA	NA	NA	0.206045	-0.575064	-0.387754	0.441981	NA	NA	0.342729	-0.400141	-0.142763	NA	NA	NA	0.153725
YBR111C	Q01976	YSA1	NA	NA	0.019819	0.322355	-0.368093	0.0487891	NA	0.150051	-0.734844	-0.273079	0.388212	NA	NA	0.174962	-0.45606	-0.140786	0.270441	NA	NA	0.600413
YOR272W	Q12024	YTM1	NA	NA	0	NA	NA	NA	NA	NA	NA	NA	NA	NA	NA	NA	NA	NA	NA	NA	NA	NA
YGR211W	P53303	ZPR1	RBP	NA	-0.229419	-0.0330723	-0.342065	0.149388	0.284136	0.440524	-0.513587	-0.339006	0.445998	0.613271	NA	0.823667	-0.769731	-0.62694	0.280991	NA	NA	0.670577
YGR285C	P32527	ZUO1	RBP	F1-F5	0.833145	0.576964	0.540093	0.00643442	-1.95664	-2.68085	2.06744	0.21611	-0.987188	-2.25467	-2.20953	-2.61339	2.11299	0.0694715	-1.02805	-2.46948	-2.54749	-2.30774
YNL241C	P11412	ZWF1	RBP	F1-F4	0.479699	0.313874	-0.145995	-0.453042	-0.231034	2.24575	-2.33316	-0.853967	0.0974961	0.394408	1.21904	1.75512	-2.62985	-0.329302	-0.520998	-0.156016	NA	1.9907

## Sheet: Sheet 3 - Polysomal MS data
													Polysome association profiles: log2(normalised LFQ intensity)
					Unstressed								H2O2										3-AT
Identifier	Uniprot	Name	Function	Cluster	F1	F2	F3	F4	F5	T	FS/T	%R	F1	F2	F3	F4	F5	T	FS/T	%R	ΔFS/T	ΔFS/T p-value	F1	F2	F3	F4	F5	T	FS/T	%R	ΔFS/T	ΔFS/T p-value
YLR153C;YAL054C	P52910;Q01574	ACS2;ACS1	RBP	1	0.84905	0.245396	-0.0817747	-0.385333	-0.647782	3.63213	-1.21651	1.43441	0.107169	0.100926	-0.395757	0.638481	NA	3.52214	-1.36304	1.29588	-0.14653	0.358532	-0.436356	-0.970226	-1.14073	0.945111	NA	3.25856	-1.39927	1.26374	-0.182757	0.587197
YLR359W	Q05911	ADE13	RBP	1	0.368587	0.270766	-0.0919336	-0.252751	-0.294669	2.40641	-0.058639	3.20057	-0.811193	-0.194164	0.0191018	0.252669	NA	2.19285	-0.325457	2.66015	-0.266818	0.220472	-1.18891	-0.811728	-0.997574	-0.553587	NA	1.94919	-0.817936	1.89084	-0.759297	0.0750833
YMR120C	P38009	ADE17	RBP	1	0.400349	0.264741	-0.106628	-0.0912809	-0.467181	2.37509	-0.0211854	3.28474	-0.786227	-0.181378	-0.0120746	0.0280589	0.338069	2.34052	-0.0965193	3.11762	-0.0753338	0.46149	-0.76175	-0.655179	-0.724642	-0.409071	NA	2.32701	-0.957948	1.71596	-0.936762	0.030716
YGR061C	P38972	ADE6	RBP	1	0.394816	0.380425	-0.363206	-0.346968	-0.0650672	2.90848	-0.547817	2.28018	-1.44996	-0.39403	-0.0867604	0.0847693	-0.232873	2.76965	-0.776832	1.94549	-0.229015	0.259	-1.40827	-1.04954	-0.752856	-0.609585	NA	2.58487	-1.50852	1.17157	-0.960702	0.0269598
YMR092C	P46680	AIP1	RBP	1	0.356494	0.338812	-0.218203	-0.341003	-0.254201	3.08167	-0.750361	1.98152	-0.894641	-0.276829	-0.0500775	0.0870363	NA	3.05144	-1.28958	1.36357	-0.539215	0.0547659	-1.06667	-0.304395	0.0233359	-0.0372774	NA	3.0575	-1.34468	1.31247	-0.594322	0.153875
YDR127W	P08566	ARO1	RBP	1	1.38847	-0.0634286	-0.67691	0.29758	-0.945712	3.42245	-0.849864	1.84946	1.16702	0.923079	1.0315	-0.0848677	NA	3.3779	-0.544268	2.2858	0.305595	0.813315	-0.190281	-0.0211896	-1.42859	-2.01679	NA	3.22407	-1.91346	0.88485	-1.0636	0.0149794
YGR124W	P49090	ASN2	RBP	1	0.175822	0.198774	0.0670845	-0.326485	-0.115196	2.72598	-0.390935	2.54212	-1.25652	-0.34706	-0.574289	-0.620972	-1.3531	2.589	-1.044	1.61661	-0.653061	0.027009	-1.40261	-0.503398	-1.58366	-0.714366	NA	2.42306	-1.40386	1.25972	-1.01292	0.0201175
YJR109C	P03965	CPA2	RBP	1	0.243896	0.156554	-0.25957	0.110074	-0.250953	2.71835	-0.380995	2.55969	-0.937126	-0.0938175	0.556131	0.539236	-0.121339	2.48835	-0.0817679	3.14966	0.299227	0.825955	-0.912904	-0.326376	0.269873	0.0296556	NA	2.49675	-0.666849	2.0996	-0.285854	0.4448
YFL022C	P15625	FRS2	RBP	1	0.113092	0.393227	0.214018	-0.229977	-0.436856	2.45006	-0.0865602	3.13922	-1.06998	-0.0840479	-0.500344	-0.0763331	NA	2.29324	-0.672593	2.09126	-0.586033	0.0413247	-1.40823	-1.55178	-1.37417	-0.453138	NA	2.03242	-1.15736	1.49444	-1.0708	0.0143523
YHR128W	P18562	FUR1	RBP	1	0.955546	0.552716	0.604493	-0.936776	-1.77335	2.24353	0.277907	4.04145	-0.777839	-0.0130616	-0.841647	-1.74466	NA	2.38449	-1.10315	1.55166	-1.38106	4.70072e-05	-0.524168	-0.15706	-0.855112	-1.08273	NA	2.38355	-0.995545	1.67182	-1.27345	0.00393719
YER055C	P00498	HIS1	RBP	1	0.715651	-0.219138	-0.188234	-0.310218	-0.22631	2.47018	-0.136667	3.03206	-0.524626	-0.23803	-0.410108	0.014455	NA	2.16525	-0.440299	2.45661	-0.303631	0.187082	-0.143257	-0.281413	0.271176	-0.24272	NA	2.51157	-0.593108	2.20971	-0.45644	0.258421
YMR186W	P15108	HSC82	RBP	1	0.836349	-0.629561	0.426974	0.243522	-0.77054	2.36713	0.104415	3.58353	-0.0419876	0.536686	-0.254279	0.102998	NA	2.37758	-0.261765	2.78022	-0.36618	0.139153	0.250932	0.334653	-0.0576846	-0.699379	NA	2.27829	-0.268336	2.76759	-0.372752	0.341826
YLL026W	P31539	HSP104	RBP	1	0.371073	0.373737	0.175629	-0.552269	-0.490895	3.30787	-0.953983	1.72068	-0.900617	0.12378	1.44558	1.31668	NA	3.20813	-0.434155	2.46709	0.519828	0.433564	-1.00589	0.0461991	0.703073	-0.30256	NA	3.1922	-1.20332	1.44758	-0.249335	0.492868
YGL009C	P07264	LEU1	RBP	1	0.628436	-0.0869211	-0.176751	0.154128	-0.56308	3.2708	-0.902951	1.78264	0.481639	0.222722	-0.210333	-0.278234	NA	3.15875	-1.07054	1.58714	-0.167585	0.331089	-0.492478	-0.507518	-0.87366	-0.110244	NA	3.18408	-1.65479	1.05861	-0.751843	0.0777385
YCL043C	P17967	PDI1	RBP	1	0.138741	0.180709	0.157192	-0.31862	-0.264506	2.39525	-0.0779982	3.1579	0.218084	0.800365	0.9141	0.91109	NA	2.72929	0.00830338	3.35257	0.0863016	0.746146	0.717194	0.619959	0.894364	1.32294	NA	2.63882	0.276006	4.03613	0.354004	0.542657
YER070W;YIL066C	P21524;P21672	RNR1;RNR3	RBP	1	-0.494383	0.182963	-0.117251	0.252208	0.14715	2.86563	-0.524948	2.31661	-0.763665	-0.609785	0.733541	0.530806	NA	2.755	-0.633403	2.14885	-0.108454	0.411672	-1.25347	-0.734765	0.00508756	-0.135946	NA	2.88036	-1.32752	1.32818	-0.802567	0.0610964
YJR009C	P00358	TDH2	RBP	1	0.895117	0.177043	-0.110008	-0.225441	-0.719953	2.60811	-0.180679	2.94096	0.643683	0.627871	0.201309	0.316783	NA	2.57738	-0.117196	3.07326	0.0634828	0.702473	-0.12249	-0.517349	-0.313461	0.609059	NA	2.2791	-0.298262	2.71077	-0.117583	0.686903
YPR074C	P23254	TKL1	RBP	1	0.603192	-0.124022	0.176013	-0.297615	-0.313564	2.80594	-0.431675	2.47133	-0.609559	-0.207047	-0.268173	-0.548673	-0.697149	2.46783	-0.598936	2.2008	-0.167261	0.331501	-0.725196	-0.519058	-0.707697	-1.70644	NA	2.57953	-1.42802	1.2388	-0.996345	0.0221039
YKL210W	P22515	UBA1	RBP	1	0.174749	0.155977	-0.0319179	-0.229483	-0.0773044	2.40719	-0.0789764	3.15576	-0.56248	-0.445119	0.155104	0.230978	NA	2.46374	-0.576688	2.235	-0.497712	0.0695599	-1.40422	-1.71938	-2.46777	-0.717832	NA	2.27145	-1.71535	1.01509	-1.63638	0.000250391
YNR016C;YMR207C	Q00955;P32874	ACC1;HFA1	RBP	2	0.0636747	0.0947752	-0.161355	-0.0628207	0.0657262	0.799429	1.52573	9.59775	-0.00377885	0.138995	0.724844	0.932832	0.43197	0.688746	2.12053	14.4951	0.594802	0.329797	-0.818788	-0.384974	-0.0911214	0.158256	-1.5439	0.877824	1.02151	6.76679	-0.504225	0.217703
YDR188W	P39079	CCT6	NA	2	0.159464	0.264096	-0.304417	-0.123333	-0.0719149	1.07377	1.24728	7.9131	-0.361687	-0.245709	0.0897441	0.489643	NA	0.764303	1.26777	8.02633	0.0204977	0.622911	-0.682825	-0.251416	-0.144946	0.160713	NA	0.842284	0.958986	6.47981	-0.288292	0.44169
YGL206C	P22137	CHC1	RBP	2	0.322269	0.0215783	-0.09288	-0.052207	-0.221981	1.61599	0.713095	5.46439	0.746357	0.339904	0.774047	0.351182	NA	1.6858	0.881959	6.14292	0.168864	0.910082	-1.30055	-0.264804	0.0374391	-0.54864	NA	1.70774	-0.147887	3.00857	-0.860981	0.0457022
YHR019C	P38707	DED81	RBP	2	-0.0831892	0.0995003	0.0462258	-0.108372	0.0458353	1.66235	0.661838	5.27366	-0.494237	-0.271285	0.0401993	-0.0510779	0.091525	1.53628	0.664564	5.28363	0.00272669	0.591198	-0.791293	-0.283635	-0.286259	-0.116995	-1.42228	1.75526	0.0581046	3.47032	-0.603733	0.14813
YLL018C	P04802	DPS1	RBP	2	-0.162147	0.0587211	0.0680311	-0.0562457	0.091641	0.970558	1.3545	8.52363	-0.653491	-0.338337	-0.18939	0.185767	-0.00768073	0.931765	1.21742	7.75103	-0.137079	0.371301	-0.812255	-0.48934	-0.182894	0.0179256	-0.614011	1.05884	0.877995	6.12607	-0.476507	0.240721
YDR385W	P32324	EFT2	TF	2	0.018571	0.0692011	-0.164544	-0.0230697	0.0998419	1.37898	0.945862	6.42113	1.76507	0.502407	0.152298	0.137682	0.0148169	1.35351	1.65319	10.4843	0.707333	0.207012	1.44456	0.0888505	-0.268772	0.0131121	-0.451866	1.27833	1.38969	8.73411	0.443833	0.422819
YKL104C	P14742	GFA1	RBP	2	-0.273851	0.104497	-0.197161	0.189697	0.127528	1.13205	1.19202	7.61577	-0.645434	0.044143	0.313936	0.721686	NA	1.35866	0.831188	5.9305	-0.360836	0.142837	-1.56049	-0.598886	0.488566	-0.242434	NA	1.32758	0.371826	4.3133	-0.820198	0.0560527
YKL152C	P00950	GPM1	RBP	2	0.86898	0.229699	-0.0729891	-0.348827	-0.676863	1.53433	0.888001	6.1687	1.93439	0.785616	-0.657924	-1.04769	-0.591213	1.31158	1.5617	9.84005	0.673699	0.239613	-0.312243	-0.588406	-0.836147	-0.423224	-0.549744	1.08268	0.707885	5.44469	-0.180115	0.591106
YGL245W	P46655	GUS1	RBP	2	-0.276306	0.0961521	0.0265682	-0.0639491	0.217535	1.23894	1.09236	7.10741	-0.408399	-0.0835979	0.294115	0.373949	0.191423	1.22306	1.19947	7.65516	0.107108	0.786694	-0.712601	-0.13434	0.20822	0.3514	-0.408857	1.10222	1.13215	7.30619	0.0397943	0.947867
YPR033C	P07263	HTS1	RBP	2	0.24967	0.0851283	-0.221974	0.0283312	-0.141155	1.44428	0.887346	6.1659	-0.267682	-0.282915	-0.0928021	-0.164972	NA	1.32974	0.470266	4.61788	-0.417079	0.107637	-0.832132	-0.0547062	0.0423825	0.384973	NA	1.20499	0.743666	5.58142	-0.14368	0.646194
YDR037W	P15180	KRS1	RBP	2	0.138468	-0.0058039	-0.15119	-0.209318	0.227844	1.49423	0.837261	5.95551	-0.547472	-0.232625	0.146191	0.0499769	0.206232	1.52742	0.744863	5.58605	-0.0923973	0.435414	-0.852125	-0.615643	-0.135475	-0.0273753	NA	1.63093	0.000486547	3.33446	-0.836774	0.0516315
YGR264C	P00958	MES1	RBP	2	-0.00285527	0.185196	-0.0748903	-0.135772	0.0283215	1.34639	0.979694	6.57349	-0.274198	-0.0462214	0.38886	0.747662	NA	1.36183	0.896332	6.20442	-0.0833618	0.449114	-0.505055	-0.179469	0.181076	0.391377	NA	1.22732	0.784542	5.74182	-0.195152	0.569019
YGR240C	P16861	PFK1	RBP	2	0.310782	0.11524	-0.253568	-0.171616	-0.00083826	1.88802	0.448154	4.54764	-0.349558	-0.158771	0.189947	0.268078	0.284267	1.66243	0.728053	5.52134	0.279899	0.864581	-0.640047	-0.357398	-0.232226	-0.0352736	-0.419988	1.51601	0.482859	4.65837	0.0347049	0.939176
YMR205C	P16862	PFK2	RBP	2	0.109061	0.179279	-0.117618	-0.177321	0.00659927	1.67587	0.65224	5.23869	-0.589096	-0.257588	0.251767	0.420125	0.630763	1.31788	1.16195	7.45867	0.509713	0.44888	-1.08037	-0.415938	-0.294904	0.0394947	0.348835	1.33257	0.784747	5.74263	0.132507	0.893764
YDR023W	P07284	SES1	RBP	2	0.29477	0.133759	-0.0870434	-0.113018	-0.228467	1.85834	0.476077	4.63652	-0.720943	-0.177155	-0.0674346	0.237173	0.473095	1.7165	0.608954	5.08384	0.132877	0.837717	-0.942086	-0.341579	-0.29133	-0.00746228	NA	1.32549	0.316816	4.15193	-0.15926	0.622375
YLR058C	P37291	SHM2	RBP	2	0.0859229	0.241285	-0.182495	-0.0627028	-0.0820092	1.54372	0.785922	5.74731	-0.416557	-0.171909	-0.0466116	-0.0533092	-0.513446	1.20133	0.892686	6.18876	0.106763	0.786018	-0.798656	-0.326774	-0.154236	-0.00475255	0.196544	1.29036	0.851558	6.01483	0.0656353	0.99207
YBR126C	Q00764	TPS1	RBP	2	-0.204216	0.0457388	-0.00829154	-0.129249	0.296017	1.4393	0.893131	6.19067	-0.910348	-0.306806	0.464072	0.615947	NA	1.44538	0.642929	5.20499	-0.250201	0.236869	-1.4257	-0.209466	0.080721	0.32316	NA	1.20879	0.617283	5.11328	-0.275848	0.457698
YFL037W	P02557	TUB2	RBP	2	-0.172106	-0.173887	-0.00737044	0.0544262	0.298938	0.576309	1.75642	11.262	0.00597679	0.059252	0.362232	0.601246	NA	0.444422	1.83312	11.8769	0.0766983	0.727657	-0.88433	-0.296594	0.102405	0.0171603	NA	0.221938	1.56107	9.83578	-0.195349	0.568731
YKL035W	P32861	UGP1	RBP	2	0.0928639	0.114208	-0.0294083	-0.198624	0.0209611	0.839972	1.48619	9.33829	-0.505352	-0.0783851	0.0307426	0.291239	0.0887724	0.650077	1.66035	10.5364	0.174157	0.920803	-1.16595	-0.424157	-0.267148	-0.238545	NA	0.768323	0.752479	5.61562	-0.733714	0.0845162
YJL130C	P07259	URA2	RBP	2	0.0549195	0.0885272	-0.21199	0.0026808	0.0658625	1.38831	0.937656	6.38471	-0.35214	-0.0679331	0.461834	0.657109	-0.260078	1.52067	0.945747	6.42062	0.00809062	0.600692	-0.933228	-0.495067	-0.0487728	0.107424	-0.647937	1.48652	0.482667	4.65775	-0.454989	0.259735
YBL039C	P28274	URA7	RBP	2	-0.503194	-0.133972	-0.18085	0.248519	0.524285	1.10115	1.25647	7.96368	-0.112816	0.059643	1.03926	1.32683	NA	1.24848	1.45875	9.16236	0.202284	0.977971	-0.700405	-0.193788	0.227275	0.356377	NA	1.27707	0.701324	5.41999	-0.555146	0.179623
YLR027C	P23542	AAT2	RBP	3	-0.0462613	0.228643	0.1456	-0.18692	-0.141062	1.01787	1.31318	8.28294	-1.69637	-0.46066	0.133861	0.303209	0.75872	0.838923	1.49973	9.42635	0.186556	0.94597	-1.57521	-0.0639431	0.418413	0.564241	0.777958	0.826699	1.71482	10.9418	0.40164	0.477079
YLR304C	P19414	ACO1	RBP	3	0.090016	0.0902286	-0.32813	-0.107073	0.254958	1.58188	0.753625	5.62008	-1.438	-0.847446	-0.341401	0.119554	0.200919	1.60943	0.372407	4.31504	-0.381218	0.129179	-1.67487	-1.10322	-0.944286	-0.710674	NA	0.971974	-0.0388614	3.24474	-0.792487	0.0641454
YFL039C	P60010	ACT1	RBP	3	0.20738	0.401591	0.00640037	-0.393407	-0.221965	1.59597	0.75417	5.6222	-0.998938	-0.321089	0.00186406	0.0718656	0.541903	1.38274	0.88302	6.14744	0.12885	0.829692	-0.836871	0.0463258	0.228959	0.569099	0.936391	1.06678	1.55657	9.80513	0.802401	0.116206
YAR015W	P27616	ADE1	NA	3	0.640524	0.143784	0.168249	-0.357667	-0.793186	1.1595	1.20364	7.67734	-1.09326	-0.205324	-0.464538	-0.705926	NA	1.37206	0.0468277	3.4433	-1.15681	0.000469617	-0.578717	0.183862	-0.110985	-0.261103	NA	0.989382	0.844878	5.98704	-0.358763	0.357286
YNL220W	P80210	ADE12	RBP	3	0.268851	0.416225	-0.23804	0.173563	-0.620598	1.44329	0.92559	6.33154	-0.967586	0.0483697	-0.169052	-0.71152	NA	1.38272	0.223988	3.89319	-0.701602	0.0195268	-0.566384	-0.0950096	-0.901576	-0.764778	NA	1.06195	0.389814	4.36741	-0.535777	0.193478
YOR128C	P21264	ADE2	RBP	3	0.0284323	0.0542824	-0.159291	-0.203711	0.280286	1.69917	0.633242	5.17015	-1.27798	-0.725829	-0.023592	0.48109	1.52154	1.95837	0.689535	5.37588	0.0562933	0.688906	-1.39348	-0.571443	-0.262593	0.0559653	NA	1.40157	0.14772	3.69273	-0.485521	0.233054
YGL234W	P07244	ADE5,7	RBP	3	-0.0714711	0.292351	-0.246325	-0.143864	0.169309	1.6801	0.655881	5.25193	-0.910747	-0.45189	0.110444	0.596887	-0.91282	1.81088	0.322078	4.1671	-0.333803	0.162627	-1.18227	-0.499016	-0.128137	-0.968756	NA	1.71083	-0.346702	2.62127	-1.00258	0.0213374
YOL086C;YMR303C;YBR145W	P00330;P00331;P38113	ADH1;ADH2;ADH5	RBP	3	0.619931	0.130141	-0.204932	-0.236633	-0.308507	1.59831	0.767658	5.67501	-0.758321	-0.17456	-0.277279	-0.419737	-0.392359	1.38027	0.550205	4.88098	-0.217453	0.271664	-0.877984	-0.279372	-0.294633	-0.45239	-0.587867	1.31911	0.520651	4.78201	-0.247007	0.496023
YMR318C	Q04894	ADH6	RBP	3	-0.023599	0.276172	0.0841195	-0.269709	-0.0669835	1.15225	1.18086	7.55709	-1.29999	-0.673011	-0.00979306	0.245547	0.739138	1.04951	1.23775	7.86104	0.0568896	0.690028	-1.21007	-0.209347	0.1897	0.388213	NA	0.957894	0.94764	6.42905	-0.233225	0.514925
YDR226W	P07170	ADK1	RBP	3	0.523995	0.493941	-0.196089	-0.45808	-0.485024	0.70744	1.66037	10.5366	-0.736766	-0.665722	-0.207053	-0.110932	NA	0.793055	0.802807	5.81497	-0.857564	0.00626649	-0.00885309	0.0377671	-0.148435	0.381483	NA	0.48777	1.59129	10.0439	-0.0690815	0.764944
YJR105W	P47143	ADO1	RBP	3	0.703735	0.273308	-0.0637865	-0.455179	-0.458078	1.58715	0.805558	5.82607	-0.43396	-0.0887967	-0.376871	-0.562778	-0.0249521	1.55293	0.486378	4.66974	-0.31918	0.17416	-0.168628	0.141525	-0.191156	-0.25237	-0.0645663	1.33903	0.88266	6.14591	0.0771022	0.9883
YLR109W	P38013	AHP1	RBP	3	0.755349	0.346546	-0.194587	-0.506934	-0.400374	1.58324	0.821322	5.89008	-0.639126	-0.1322	-0.235035	-0.509213	-1.00577	1.50519	0.344733	4.23305	-0.476588	0.0782661	0.00108207	-0.0173517	-0.149459	-0.196581	-0.902942	1.27575	0.827844	5.91677	0.00652262	0.891209
YOR335C	P40825	ALA1	RBP	3	-0.193599	0.0896736	0.00877013	-0.067782	0.162937	1.57001	0.757196	5.63401	-0.877235	-0.63802	0.21689	0.585071	0.586507	1.61459	0.805201	5.82463	0.0480049	0.673389	-1.27507	-0.506318	-0.107194	0.276442	NA	1.42659	0.27687	4.03854	-0.480327	0.237451
YPL061W	P54115	ALD6	RBP	3	0.266387	0.213632	-0.0936508	-0.277614	-0.108755	1.77679	0.560031	4.91434	-1.12618	-0.423152	-0.079907	0.213234	0.367145	1.95461	0.246748	3.9551	-0.313283	0.17898	-1.10538	-0.501757	-0.245347	0.227275	-0.0114947	1.7539	0.308683	4.12859	-0.251348	0.490147
YGL105W	P46672	ARC1	RBP	3	0.447397	0.611874	-0.821521	-0.167916	-0.366952	1.34999	1.00706	6.69939	0.145311	0.234591	-0.11505	0.341229	NA	1.42984	0.731312	5.53383	-0.275752	0.212001	0.20769	-0.619725	-0.0976141	0.284926	NA	1.29771	0.687261	5.36741	-0.319803	0.402618
YBR249C	P32449	ARO4	RBP	3	0.468839	0.417184	-0.0762371	-0.458895	-0.350892	1.37492	0.997889	6.65692	-0.796854	-0.476538	-0.587164	-0.311009	NA	1.78695	-0.319135	2.67183	-1.31702	9.36245e-05	-0.649584	0.221972	0.24777	0.45909	NA	1.61422	0.512038	4.75354	-0.485852	0.232777
YGL202W	P53090	ARO8	RBP	3	0.067372	0.218305	0.0120117	-0.253623	-0.044066	1.3726	0.957457	6.47295	-1.50618	-0.532491	-0.0414185	0.0307093	-0.733844	1.3178	0.54531	4.86444	-0.412148	0.110419	-1.5288	-0.373412	-0.38882	-0.00532023	NA	1.18119	0.344177	4.23142	-0.613281	0.14247
YBL099W	P07251	ATP1	RBP	3	0.0105063	0.093155	0.0932148	-0.175065	-0.0218108	0.464996	1.86024	12.1023	-2.0775	-0.659231	-0.167021	-0.176901	-0.693705	0.139611	1.56689	9.87552	-0.293348	0.196008	-2.40896	-0.615251	-0.439855	-0.557186	NA	-0.214668	1.38968	8.734	-0.470562	0.245873
YJR121W	P00830	ATP2	RBP	3	0.0780373	0.289948	0.00359368	-0.185171	-0.186408	0.3053	2.02784	13.5931	-1.65385	-0.420211	-0.107323	-0.0157807	0.472731	0.165691	1.96203	12.987	-0.0658074	0.476419	-1.7197	-0.572013	-0.210369	-0.29932	0.642906	-0.263863	2.3393	16.8685	0.311458	0.6048
YHR208W	P38891	BAT1	RBP	3	0.299001	0.277266	-0.11797	-0.24716	-0.211137	1.11957	1.22243	7.778	-1.72013	-0.61505	-0.556844	-0.102928	NA	1.09836	0.261925	3.99692	-0.96051	0.00273249	-1.7321	-0.557225	-0.565658	-0.354051	NA	0.831822	0.454262	4.56694	-0.768172	0.0720189
YER177W	P29311	BMH1	RBP	3	-0.176014	0.252477	0.0819364	-0.239661	0.0426926	1.10843	1.2169	7.74823	-1.51021	-0.651506	-0.0537182	0.241657	0.591604	1.03772	1.17653	7.5344	-0.0403751	0.517539	-1.97241	-0.162674	0.0425758	0.601989	0.920492	0.689759	1.79276	11.5492	0.575856	0.278003
YDR099W	P34730	BMH2	RBP	3	0.0367559	0.0257642	0.0451105	-0.120267	0.0218251	1.26288	1.06218	6.96026	-1.2676	-0.343026	-0.124281	0.258247	1.08076	0.857074	1.58451	9.99685	0.522331	0.429821	-1.15118	0.176396	-0.224877	0.385116	1.05565	0.744079	1.79709	11.5839	0.734913	0.153841
YPL048W	P29547	CAM1	TF	3	0.620485	0.47311	-0.115274	-0.417706	-0.560614	0.552312	1.84695	11.9913	-0.586407	0.231127	-0.0281772	-0.0269115	0.407907	0.369706	1.98888	13.231	0.141937	0.855831	-0.547435	0.291368	0.180833	0.413104	NA	0.231035	1.89763	12.42	0.0506811	0.966478
YAL038W	P00549	CDC19	RBP	3	0.117552	0.136422	-0.092255	-0.121467	-0.0402512	1.56585	0.760069	5.64524	-1.1955	-0.434665	-0.0931592	0.143333	0.438682	1.44398	0.749406	5.60367	-0.0106631	0.567806	-1.25587	-0.437013	-0.305333	0.219726	0.133441	1.39474	0.685258	5.35996	-0.0748117	0.755581
YDL126C	P25694	CDC48	RBP	3	0.125628	0.26539	-0.000662963	-0.357461	-0.0328938	1.74987	0.586546	5.00549	-1.33912	-0.418421	0.382376	0.418384	0.64494	1.28338	1.13537	7.32252	0.548827	0.391365	-1.22792	-0.448158	-0.0774933	-0.0873796	NA	1.65832	-0.0500522	3.21967	-0.636599	0.129346
YPL160W	P26637	CDC60	RBP	3	-0.172373	0.163845	-0.0139374	-0.0621527	0.0846181	1.73574	0.590874	5.02053	-1.02098	-0.431317	0.154385	0.379486	0.589955	1.80701	0.558508	4.90915	-0.0323666	0.530858	-1.20436	-0.505293	-0.124684	0.496904	0.0850021	1.79273	0.386005	4.3559	-0.204869	0.554958
YLL050C	Q03048	COF1	RBP	3	0.501979	0.413814	0.0604995	-0.356302	-0.61999	0.602319	1.78257	11.4679	-1.244	-0.299407	-0.24328	-0.552347	NA	0.617717	0.847746	5.99896	-0.934821	0.00338149	-0.745405	-0.119776	0.00225414	-0.28512	NA	0.618303	1.12114	7.25064	-0.661424	0.116426
YDR155C	P14832	CPR1	RBP	3	0.684224	0.413466	-0.0199245	-0.671581	-0.406185	1.0291	1.37892	8.6691	-0.334753	-0.0605544	-0.166272	-0.393178	-0.349811	1.0423	1.02434	6.78011	-0.354574	0.147247	0.578965	0.214282	0.242876	0.396555	0.37243	0.864725	1.82416	11.8034	0.445243	0.42107
YAL012W	P31373	CYS3	RBP	3	0.0989859	0.275747	-0.0491853	-0.239708	-0.0858397	1.13426	1.19839	7.64943	-1.241	-0.49184	-0.269285	-0.0499282	0.273415	1.22018	0.828959	5.92134	-0.369428	0.13695	-1.38269	-0.584567	-0.328876	0.143599	0.190874	0.829272	1.20375	7.67794	0.00536696	0.889249
YGR155W	P32582	CYS4	RBP	3	0.355117	0.176824	-0.180919	-0.217259	-0.133763	1.55223	0.787839	5.75495	-1.12357	-0.600253	-0.324626	-0.631914	-0.0360969	1.56646	0.256359	3.98153	-0.53148	0.0573046	-1.43399	-0.83314	-0.624272	-0.427797	NA	1.28914	-0.0728073	3.16929	-0.860646	0.0457801
YML070W	P54838	DAK1	RBP	3	0.305331	0.199506	0.228178	-0.353524	-0.322447	2.02208	0.339059	4.21644	-1.87809	-0.745906	-0.221776	0.0999616	NA	1.86191	-0.377721	2.56551	-0.71678	0.0175933	-2.17303	-0.767102	-0.678917	0.504052	NA	1.6957	-0.183643	2.93492	-0.522702	0.203265
YEL071W	P39976	DLD3	RBP	3	0.696783	0.089674	-0.303002	0.104978	-0.664183	1.79288	0.586215	5.00434	-1.07288	0.0460641	-1.46483	-0.485366	-0.470687	1.79917	-0.0740681	3.16652	-0.660284	0.0257589	-0.936016	-0.128915	-0.326865	-0.681328	NA	1.50652	0.00851496	3.35307	-0.577701	0.164434
YFR044C	P43616	DUG1	RBP	3	0.320049	0.246885	-0.0642176	-0.189692	-0.313024	1.31216	1.03074	6.81025	-1.58478	-0.671974	-0.162782	-0.100874	0.378229	1.30592	0.72496	5.50952	-0.305782	0.185254	-1.7624	-0.469598	-0.372011	0.118752	NA	1.01303	0.510741	4.74927	-0.520001	0.205331
YAL003W	P32471	EFB1	TF	3	0.171577	0.301587	0.110939	-0.350253	-0.233851	0.466265	1.87672	12.2413	-0.497305	-0.278676	-0.0334971	-0.104756	-0.215282	0.432515	1.67221	10.6234	-0.204512	0.286334	-0.235594	0.123175	0.0395499	0.137491	-0.122026	0.051423	2.26621	16.0353	0.389488	0.493385
YGR254W	P00924	ENO1	RBP	3	0.213822	0.315022	-0.00233232	-0.301457	-0.225055	0.702015	1.63973	10.3869	-1.48638	-0.456152	-0.170102	-0.105107	-0.107049	0.947329	0.991083	6.62559	-0.64865	0.0277979	-1.29978	-0.402645	-0.13516	0.0884266	0.155766	0.792894	1.29472	8.17766	-0.345011	0.372906
YHR174W	P00925	ENO2	RBP	3	0.312675	0.212599	-0.0656499	-0.299558	-0.160066	1.29039	1.04982	6.90092	-0.974461	-0.344377	-0.218635	-0.0195867	-0.0483367	1.15718	0.881793	6.14221	-0.16803	0.330525	-0.663419	-0.186077	-0.00194918	0.0461768	0.0901997	1.00052	1.20301	7.674	0.15319	0.858783
YPL028W	P41338	ERG10	RBP	3	0.30787	0.360835	-0.0925315	-0.611926	0.0357536	1.65642	0.70516	5.43442	-1.46069	-0.212401	-0.0770078	0.132199	0.187057	1.68209	0.458311	4.57977	-0.246849	0.240279	-1.62322	-0.574125	-0.502335	0.0826074	0.064115	1.46802	0.460497	4.58672	-0.244662	0.499213
YML126C	P54839	ERG13	RBP	3	0.404965	0.286998	-0.209931	-0.252029	-0.230003	1.61173	0.739076	5.56369	-1.3247	-0.415813	-0.235326	-0.372531	-0.159408	1.33347	0.540788	4.84922	-0.198288	0.293576	-1.43062	-0.456818	-0.172761	-0.166873	NA	1.44063	0.0841751	3.5336	-0.654901	0.119718
YJL167W	P08524	ERG20	RBP	3	0.194447	0.0442698	0.0486676	-0.179753	-0.143508	1.3525	0.968826	6.52416	-1.4717	-0.603501	-0.306673	-0.130768	0.228059	1.60087	0.366973	4.29881	-0.601854	0.0374659	-1.14021	-0.370022	-0.197973	0.272156	NA	1.21314	0.512319	4.75447	-0.456507	0.258361
YKL182W	P07149	FAS1	RBP	3	1.17739	0.352967	-0.378641	-0.596598	-0.555114	0.925386	1.57285	9.91637	0.410328	0.0950779	0.118245	0.0262318	-0.433255	0.935737	1.45423	9.13369	-0.118614	0.397054	0.151897	-0.035481	-0.224188	-0.235987	-1.02789	0.988235	1.11016	7.19568	-0.462681	0.252822
YPL231W	P19097	FAS2	RBP	3	1.02323	0.398388	-0.345397	-0.607945	-0.468281	0.81223	1.65154	10.4723	0.0814258	-0.15328	0.0665091	0.164835	0.102972	0.772957	1.60541	10.1427	-0.0461293	0.508077	-0.224468	-0.147831	-0.230453	-0.00981129	-0.407072	0.623264	1.50049	9.43128	-0.151049	0.634882
YKL060C	P14540	FBA1	RBP	3	0.800803	0.254372	-0.0842504	-0.33612	-0.634805	1.67967	0.730227	5.52967	-0.410611	-0.0962562	-0.607842	-0.438184	0.0552209	1.64391	0.399093	4.39559	-0.331134	0.164687	0.213544	-0.154095	-0.416557	0.098871	0.110678	1.66808	0.641708	5.20058	-0.0885193	0.733329
YLR060W	P15624	FRS1	RBP	3	0.490952	0.429258	-0.357136	-0.0737298	-0.489344	2.07388	0.30329	4.11318	-0.733232	-0.001836	-0.182316	0.201895	NA	2.11129	-0.250612	2.8018	-0.553902	0.0502036	-0.683069	-0.429199	-0.246451	-0.213038	NA	2.10401	-0.485209	2.38131	-0.788499	0.0653856
YOR375C;YAL062W	P07262;P39708	GDH1;GDH3	RBP	3	0.108212	0.232258	-0.196323	-0.195749	0.0516017	1.36242	0.969539	6.52738	-1.30101	-0.381989	0.126554	0.0887445	0.319695	1.42911	0.765111	5.665	-0.204428	0.28643	-1.52214	-0.530998	-0.246278	-0.15258	NA	1.24285	0.233767	3.91967	-0.735773	0.0837233
YER136W	P39958	GDI1	RBP	3	-0.00950003	0.0240874	0.0250251	-0.0697122	0.0484748	1.61674	0.709446	5.45059	-1.29653	-0.529777	0.0560319	0.472521	NA	1.63484	0.183561	3.78561	-0.525885	0.0592014	-0.990546	-0.0269611	0.175361	0.430286	NA	1.80415	0.181902	3.78126	-0.527544	0.199599
YPR035W	P32288	GLN1	RBP	3	0.125983	0.231478	-0.105335	-0.220177	-0.0319493	1.06392	1.26705	8.02229	-0.930301	-0.51043	-0.0086916	-0.222678	0.260433	1.17103	0.925086	6.32933	-0.341962	0.156447	-1.15984	-0.249675	0.00520506	-0.0314117	NA	0.448878	1.26073	7.98725	-0.00631611	0.869478
YOR168W	P13188	GLN4	RBP	3	0.222431	0.519793	-0.360309	-0.363741	-0.0181737	2.17303	0.18988	3.80223	-0.896233	-0.302266	0.0467978	0.667893	NA	2.0583	-0.0691687	3.17729	-0.259049	0.228034	-1.28753	-0.569038	-0.267022	-0.229001	NA	1.93723	-0.468396	2.40923	-0.658276	0.118006
YDL171C	Q12680	GLT1	RBP	3	0.597198	0.0463926	-0.390642	-0.264839	0.0118902	1.9797	0.384538	4.35147	-0.762216	-0.681862	0.690015	1.4344	-0.377991	2.37107	0.283931	4.05836	-0.100607	0.423177	-1.58297	-1.28435	-0.656656	-0.237951	NA	2.25334	-1.09847	1.5567	-1.48301	0.000859806
YEL046C	P37303	GLY1	RBP	3	0.377528	0.187565	0.13882	-0.256834	-0.44708	1.90308	0.450079	4.55372	-1.30545	-0.183052	-0.247018	-0.215914	NA	1.86646	-0.286762	2.73247	-0.736841	0.0152964	-1.76672	-1.05779	-0.331683	-0.583513	NA	1.65577	-0.494733	2.36564	-0.944812	0.0294057
YHR183W;YGR256W	P38720;P53319	GND1;GND2	RBP	3	-0.0312954	0.21958	-0.0498284	-0.121141	-0.0173156	1.25084	1.07584	7.02652	-0.799939	-0.423835	0.0155598	-0.049248	0.00721821	0.984304	1.12074	7.24862	0.044897	0.667606	-1.17291	-0.466932	-0.149421	-0.0441178	-0.763793	0.714521	1.14444	7.36868	0.0685971	0.99714
YIL053W	P41277	GPP1	RBP	3	0.996046	-0.033692	-0.0141821	-0.429277	-0.69186	1.26787	1.14446	7.36878	-0.456584	0.0980778	-0.515639	-1.85867	NA	1.11367	0.35844	4.27346	-0.78602	0.0107462	-0.0338179	-0.0518219	-0.0475869	-1.28091	NA	0.868641	0.862819	6.06196	-0.281641	0.450206
YBR121C;YPR081C	P38088;Q06817	GRS1;GRS2	RBP	3	-0.0944694	0.180251	-0.100332	-0.0521272	0.0666768	2.04966	0.2764	4.03723	-0.8449	-0.344856	0.146276	0.326369	0.590514	2.04091	0.340511	4.22068	0.0641111	0.703663	-0.975322	-0.490584	-0.123273	-0.198201	-0.619138	1.82363	0.0486705	3.4477	-0.227729	0.522565
YMR217W	P38625	GUA1	RBP	3	-0.29613	0.128259	0.0287637	-0.0696961	0.208804	1.10858	1.22373	7.78501	-0.666051	-0.180775	0.188176	0.357593	0.366372	1.03201	1.35264	8.51263	0.128906	0.829804	-1.10158	-0.242782	0.127413	0.139763	0.206514	0.972245	1.2478	7.91596	0.0240655	0.921032
YDR454C	P15454	GUK1	RBP	3	0.629554	0.486723	0.0843477	-0.83627	-0.686535	1.15677	1.21896	7.75929	-0.270735	-0.319396	-0.269442	-0.481577	NA	1.16219	0.505083	4.73068	-0.713876	0.0179497	0.67272	-0.174561	-0.0587879	0.422782	NA	0.988661	1.26856	8.03069	0.0495992	0.964628
YCL030C	P00815	HIS4	RBP	3	-0.128187	0.0840822	0.0137293	-0.0228824	0.0532578	1.89826	0.425521	4.47686	-0.830455	-0.32121	0.298251	0.445217	0.623264	1.808	0.649929	5.2303	0.224409	0.976965	-0.979148	-0.455328	0.0993468	0.37526	NA	1.61043	0.239564	3.93545	-0.185957	0.582479
YDR158W	P13663	HOM2	RBP	3	0.27746	0.28771	-0.243637	0.0165966	-0.338129	1.38937	0.955463	6.46401	-1.84771	-0.891533	-0.712189	-0.0577777	0.756811	1.153	0.874778	6.11242	-0.0806848	0.45322	-1.86118	-0.465031	-0.654374	0.219268	NA	1.43221	0.0528063	3.4576	-0.902657	0.036838
YJR139C	P31116	HOM6	RBP	3	0.72003	0.162291	-0.181706	-0.340363	-0.360252	2.15471	0.228461	3.90528	-0.366806	-0.195002	-0.121557	-0.75132	0.338303	1.95581	0.190383	3.80356	-0.0380772	0.521343	-0.279606	-0.107219	-0.205867	-0.0909456	0.723741	1.92659	0.454577	4.56794	0.226117	0.73808
YLR301W	Q05905	HRI1	RBP	3	0.555744	0.509168	-0.232182	-0.744026	-0.195665	1.63873	0.743865	5.58219	-1.20894	-0.513908	-0.478991	-0.844404	NA	1.54998	-0.282547	2.74046	-1.02641	0.00155303	-1.05386	-0.401722	-0.171095	-0.12503	NA	1.26373	0.342132	4.22543	-0.401733	0.31118
YLR259C	P19882	HSP60	RBP	3	0.214986	0.203408	-0.174981	-0.255405	0.0119918	0.882429	1.45214	9.12042	-1.25802	-0.520618	0.0825855	0.377119	0.586152	0.521427	1.79301	11.5512	0.34087	0.744265	-1.94539	-0.998148	-0.8377	-0.590545	-0.431286	0.484348	0.96218	6.49417	-0.489955	0.229347
YFR053C	P04806	HXK1	RBP	3	0.516349	0.544926	-0.322944	-0.790011	-0.180652	1.78226	0.582132	4.9902	-1.30601	-0.571037	-0.404676	-0.759075	NA	1.57949	-0.302186	2.70341	-0.884318	0.00508173	-1.46521	-0.331061	-0.0268433	-0.751882	NA	1.3403	0.109937	3.59727	-0.472196	0.24445
YGL253W	P04807	HXK2	RBP	3	0.59381	0.228636	-0.176833	-0.312204	-0.333409	1.933	0.43568	4.50849	-0.958537	-0.502869	-0.243803	0.0933212	0.0972357	1.72277	0.348078	4.24288	-0.0876018	0.442655	-0.762341	-0.669646	-0.225534	0.142521	-0.203804	1.6942	0.322145	4.16729	-0.113535	0.693304
YOR136W	P28241	IDH2	RBP	3	0.215807	0.400255	-0.0186718	-0.410961	-0.186429	0.869664	1.48059	9.30209	-1.61433	-0.714486	-0.0917967	-0.0803506	NA	0.480382	1.01543	6.73833	-0.465163	0.0833329	-1.8339	-0.818779	-0.483154	-0.115397	NA	0.0794388	1.23437	7.84261	-0.24622	0.497093
YBL076C	P09436	ILS1	RBP	3	-0.0895936	0.111719	-0.117222	-0.0645062	0.159603	1.6345	0.691901	5.3847	-0.785639	-0.466776	0.16391	0.22125	-0.209578	1.548	0.607276	5.07794	-0.0846241	0.447186	-1.1694	-0.541806	-0.032571	0.13151	NA	1.47954	0.200622	3.83064	-0.491279	0.228249
YMR108W	P07342	ILV2	RBP	3	0.236957	0.102504	-0.0819033	-0.42009	0.162532	0.776836	1.56332	9.85111	-1.71217	-0.661983	-0.165	0.397767	NA	0.480021	1.17378	7.52004	-0.389545	0.1239	-1.8602	-1.28288	-0.830712	-0.620869	NA	0.535088	0.390109	4.36831	-1.17321	0.00762883
YJR016C	P39522	ILV3	RBP	3	0.395894	0.129772	-0.34662	-0.206434	-0.0592677	1.80827	0.520202	4.78052	-1.54054	-0.671059	-0.220674	-0.0394463	NA	1.47828	0.00868782	3.35347	-0.511515	0.0643127	-2.03691	-1.45967	-0.474337	-0.276591	NA	1.30266	-0.19658	2.90872	-0.716783	0.0912704
YLR355C	P06168	ILV5	RBP	3	0.475118	0.339954	-0.241834	-0.333151	-0.240087	1.2593	1.10301	7.16007	-1.41432	-0.526517	-0.471208	-0.605519	-0.457805	1.181	0.486254	4.66934	-0.616755	0.0341163	-1.45849	-0.715091	-0.612941	-0.407152	-0.550213	1.00093	0.614453	5.10326	-0.488555	0.230513
YBR011C	P00817	IPP1	RBP	3	0.588489	0.273734	-0.0867501	-0.345088	-0.430385	1.25624	1.11771	7.23341	-0.538646	-0.201673	-0.506318	-1.1604	NA	1.15758	0.280372	4.04836	-0.837338	0.00732131	-0.276528	-0.213578	-0.311775	-0.413064	NA	0.700673	0.997389	6.65461	-0.120321	0.682586
YER110C	P40069	KAP123	RBP	3	-0.113069	0.166184	0.144658	-0.101825	-0.0959475	1.60651	0.721082	5.49473	-0.991205	-0.377328	-0.177407	0.0647826	-0.214888	1.59825	0.424913	4.47497	-0.296169	0.193529	-1.18292	-0.4167	-0.241704	-0.349414	NA	1.41503	0.0807849	3.52531	-0.640297	0.127353
YER091C	P05694	MET6	RBP	3	0.13306	0.184286	0.0223052	-0.190722	-0.148929	1.88644	0.443125	4.53182	-1.08067	-0.405808	-0.0174203	0.110662	0.466187	1.76105	0.46447	4.59937	0.021345	0.624441	-1.21661	-0.533706	-0.278517	0.247841	0.235361	1.77292	0.334818	4.20406	-0.108307	0.701603
YIL051C	P40185	MMF1	RBP	3	0.32414	0.587306	0.0536001	-0.549109	-0.415936	0.780361	1.60512	10.1407	-1.46951	-0.406328	-0.32957	-0.26054	0.755072	0.576683	1.5719	9.90984	-0.0332241	0.529424	-1.29445	-0.15398	-0.232628	-0.0764301	NA	0.422993	1.21204	7.72216	-0.393082	0.320132
YNR043W	P32377	MVD1	RBP	3	0.465711	0.407429	0.24652	-0.485502	-0.634158	1.66002	0.73291	5.53996	-1.5714	-0.525511	-0.373491	-0.321354	NA	1.46345	-0.0830429	3.14688	-0.815952	0.00860745	-1.31833	-0.574283	-0.383511	-0.290044	NA	1.40702	0.00281801	3.33985	-0.730092	0.0859262
YLR044C;YLR134W	P06169;P16467	PDC1;PDC5	RBP	3	0.575556	0.0434948	-0.223605	-0.0941924	-0.301253	1.91676	0.44097	4.52506	-0.624157	-0.112316	-0.280454	-0.186786	-0.345391	2.09365	-0.0711429	3.17295	-0.512113	0.0640928	-0.801809	-0.207936	-0.284718	-0.786828	-0.66859	1.95088	-0.156338	2.991	-0.597308	0.152034
YOR122C	P07274	PFY1	NA	3	0.487282	0.247906	-0.0603069	-0.714415	-0.308295	0.653835	1.65807	10.5198	-0.996544	-0.230754	-0.303532	-0.380929	NA	0.982681	0.569006	4.945	-1.08907	0.000885606	-0.317153	-0.0548001	0.223367	-0.161723	NA	1.12306	0.813073	5.8565	-0.845	0.0495481
YBR196C	P12709	PGI1	RBP	3	0.349204	0.112159	-0.0833113	-0.129128	-0.248923	2.10956	0.228008	3.90406	-1.10549	-0.426017	-0.378874	-0.24209	-0.304272	1.84521	0.0161375	3.37083	-0.21187	0.277928	-1.19981	-0.464208	-0.441393	-0.161597	-0.955175	1.58664	0.13864	3.66956	-0.0893678	0.731958
YCR012W	P00560	PGK1	RBP	3	0.542439	0.312192	-0.094274	-0.366222	-0.394135	0.944159	1.42643	8.95937	-0.760173	-0.28612	-0.220841	-0.37254	-0.164869	0.640493	1.33515	8.41004	-0.0912846	0.437088	-0.468587	-0.0768411	-0.056566	-0.0751535	-0.181376	0.755427	1.40273	8.8134	-0.0236971	0.840217
YER003C	P29952	PMI40	RBP	3	0.638274	0.364804	-0.0352652	-0.716405	-0.251408	1.19483	1.20263	7.67194	-1.00419	-0.303019	-0.068619	-0.460845	NA	0.965888	0.613879	5.10123	-0.588746	0.0406398	-0.770423	0.00193014	0.069429	-0.496576	NA	0.815335	0.926962	6.33756	-0.275664	0.457937
YPR103W	P30656	PRE2	RBP	3	0.149741	0.175151	0.0918071	-0.297947	-0.118752	-0.0269108	2.35992	17.1114	-1.20149	-0.249657	-0.105634	-0.106031	NA	-0.129575	1.77779	11.43	-0.582128	0.0423271	-1.6568	-0.496139	-0.552401	0.166303	NA	-0.145241	1.64615	10.4332	-0.71377	0.0925164
YOR323C	P54885	PRO2	RBP	3	0.655379	0.324997	-0.426518	-0.368516	-0.389297	1.47557	0.877703	6.12482	-0.947445	-0.528422	-0.250824	-0.72374	NA	1.53653	-0.126295	3.05394	-1.004	0.00188765	-0.548644	-0.38856	-0.21136	-0.801486	NA	1.36401	0.164576	3.73612	-0.713127	0.0927841
YER023W	P32263	PRO3	RBP	3	-0.209097	0.253802	-0.251797	-0.0100144	0.154157	0.883239	1.43959	9.04147	-1.21986	-0.448405	-0.140415	0.125566	NA	0.982142	0.677953	5.33289	-0.761638	0.0128249	-1.54646	-0.475749	0.0587827	0.296936	NA	0.747375	0.988823	6.61522	-0.450769	0.263584
YDL055C	P41940	PSA1	RBP	3	0.222117	0.272166	-0.0337336	-0.290535	-0.170013	1.36611	0.972284	6.53981	-1.43163	-0.502669	-0.135334	-0.190964	-0.0520263	1.31591	0.620516	5.12475	-0.351768	0.149258	-1.15794	-0.0991911	0.176112	0.158137	0.208156	1.26667	0.991128	6.62579	0.0188437	0.912142
YMR235C	P11745	RNA1	RBP	3	0.408038	-0.0404629	0.0512507	-0.133159	-0.380889	1.25309	1.07321	7.01372	-0.666963	-0.074985	-0.371164	-0.524474	NA	1.35107	0.256581	3.98215	-0.816634	0.00856356	-0.159965	0.00070053	0.215067	0.0903381	NA	0.985088	1.05787	6.93954	-0.0153395	0.854262
YJL026W	P09938	RNR2	RBP	3	-0.0356695	0.228992	0.0322758	-0.306163	0.0805642	0.920235	1.41217	8.87124	-1.46645	-0.506983	-0.125285	0.140613	0.884608	0.956943	1.34494	8.46734	-0.0672254	0.47418	-1.45604	-0.495927	-0.086092	0.453813	1.13034	0.808126	1.6707	10.6123	0.258528	0.686257
YGR180C	P49723	RNR4	RBP	3	0.415068	0.135964	0.25168	-0.516429	-0.286283	2.04018	0.322122	4.16723	-0.948117	-0.551051	-0.387105	-0.172945	0.234818	1.88281	0.127715	3.64187	-0.194407	0.298154	-1.17342	-0.354384	0.0381625	-0.059935	0.487726	1.5737	0.632294	5.16676	0.310172	0.606728
YHR027C	P38764	RPN1	RBP	3	0.0144873	0.046374	-0.126115	-0.11473	0.179984	1.44975	0.876634	6.12029	-0.748634	-0.692474	0.246737	0.107952	NA	1.3987	0.39963	4.39723	-0.477004	0.0780867	-1.1243	-0.239677	-0.58215	0.176267	NA	0.921693	0.712242	5.46116	-0.164392	0.614615
YIL075C	P32565	RPN2	RBP	3	0.459603	0.441512	-0.355464	-0.557805	0.0162047	1.23285	1.14717	7.38263	-0.573815	-0.359005	0.264039	0.203311	NA	1.11872	0.808692	5.83874	-0.338478	0.159064	-0.787746	-0.813746	-1.09778	-1.28342	NA	1.089	-0.0702189	3.17498	-1.21739	0.00572974
YER021W	P40016	RPN3	RBP	3	0.476759	0.100833	-0.167083	-0.45228	NA	1.14781	0.882713	6.14613	-1.04561	-0.479512	-0.0588618	0.337386	NA	1.06568	0.710484	5.45451	-0.172229	0.325225	-0.964682	-0.624263	-0.30398	0.291823	NA	1.02485	0.651124	5.23464	-0.231589	0.517193
YDR129C	P32599;REV__P32599	SAC6	RBP	3	-0.0225043	0.183278	0.0194274	-0.0247763	-0.155425	1.13683	1.18924	7.60109	-0.828089	-0.214987	0.256787	0.171775	NA	1.05159	0.85379	6.02414	-0.33545	0.161364	-1.4031	-0.17432	0.134798	0.128371	NA	1.00809	0.780725	5.72665	-0.408516	0.304279
YER043C	P39954	SAH1	RBP	3	0.386735	0.284021	-0.136381	-0.292885	-0.24149	2.16939	0.18024	3.77691	-0.994067	-0.199795	0.181607	0.102508	0.156852	2.15614	0.0750998	3.51145	-0.105141	0.416507	-0.970211	-0.209484	-0.162577	0.0641758	0.107615	1.99687	0.137893	3.66766	-0.0423472	0.809065
YLR180W	P10659	SAM1	RBP	3	0.47952	0.241173	-0.157448	-0.262117	-0.280198	1.79458	0.564427	4.92933	-0.940101	-0.0459539	-0.286336	-0.500737	NA	1.77731	-0.184399	2.93339	-0.748826	0.0140539	-0.73955	-0.452631	-0.332245	0.0902718	NA	1.53432	0.138561	3.66936	-0.425866	0.28709
YDR502C	P19358	SAM2	RBP	3	0.491297	0.26026	-0.201883	-0.205358	-0.394787	1.31821	1.03249	6.81852	-0.950115	-0.410956	-0.279876	-0.932037	NA	1.37537	0.0128138	3.36307	-1.01968	0.0016473	-1.28991	-0.72442	-0.874568	-0.569182	NA	1.33851	-0.179113	2.94415	-1.21161	0.0059513
YPL273W;YMR321C	Q08985;Q04898	SAM4;YMR321C	RBP	3	0.230501	0.455712	0.00643058	-0.482134	-0.21051	0.353379	2.00539	13.3832	-1.60606	-0.578061	-0.013181	-0.504909	NA	0.438933	0.990799	6.62429	-1.01459	0.00172205	-1.53228	-0.0969053	0.0956607	0.173231	NA	0.282548	1.51525	9.52831	-0.490134	0.229199
YGL011C	P21243	SCL1	RBP	3	0.31464	0.29679	-0.167443	-0.381192	-0.0627954	0.0392822	2.30774	16.5036	-1.50113	-0.379931	-0.12476	0.206785	0.485589	-0.0250577	2.22455	15.5788	-0.0831924	0.449374	-1.78227	-0.693021	-0.464003	0.153199	NA	0.00867931	1.4488	9.09938	-0.858939	0.0461791
YMR079W;YKL091C	P24280;P33324	SEC14;YKL091C	RBP	3	0.0821262	0.185697	-0.110965	0.0897228	-0.22415	1.62837	0.705676	5.43636	-1.13065	-0.168719	0.212974	0.386863	0.452699	1.54354	0.829844	5.92498	0.124167	0.820384	-1.22862	-0.504263	0.179598	0.450476	NA	1.57725	0.283039	4.05585	-0.422638	0.290237
YGL137W	P41811	SEC27	RBP	3	0.617965	0.242108	-0.391347	-0.193756	-0.372808	0.859274	1.49869	9.41951	-0.116644	-0.0558557	0.312419	-0.102348	NA	0.922324	1.09832	7.13686	-0.400363	0.117296	-0.33199	-0.244049	-0.579904	-1.20853	NA	0.857968	0.596487	5.0401	-0.902199	0.0369267
YFL045C	P07283	SEC53	RBP	3	0.201954	0.315034	0.000284945	-0.36135	-0.155923	1.23689	1.10524	7.17114	-1.07882	-0.310462	-0.207027	-0.245381	-0.106791	1.27439	0.69586	5.3995	-0.409376	0.112007	-0.916584	-0.389073	-0.0469686	-0.0284917	NA	0.976289	0.720503	5.49252	-0.384733	0.328929
YHR163W	P38858	SOL3	NA	3	0.457973	0.423129	-0.0394698	-0.801619	-0.50057	0.741475	1.57119	9.90497	-1.11598	-0.868134	-0.369691	-0.400239	NA	0.350883	0.994464	6.64114	-0.576722	0.043749	-1.31542	-0.310364	-0.234287	0.955439	NA	0.919632	1.07947	7.04421	-0.491714	0.227889
YPR069C	Q12074	SPE3	RBP	3	0.541799	0.21231	0.137892	-0.288624	-0.603377	1.33268	1.04348	6.87065	-1.02577	-0.278307	-0.365789	-1.04373	NA	1.19127	0.174327	3.76146	-0.869155	0.00572561	-0.648022	-0.1902	-0.249159	-0.130811	NA	1.21664	0.492362	4.68915	-0.55112	0.18244
YJR045C;YEL030W	P0CS90;P39987	SSC1;ECM10	RBP	3	0.117201	0.287694	-0.100396	-0.230217	-0.0742808	1.25649	1.07705	7.03241	-1.01701	-0.433597	-0.00734498	0.0778151	-0.018165	1.11484	0.980204	6.57581	-0.0968493	0.428753	-1.24481	-0.553272	-0.39502	-0.188984	-0.581831	0.794572	0.974883	6.55161	-0.10217	0.71139
YPL106C	P32589	SSE1	RBP	3	0.264151	0.143449	-0.267782	-0.0194284	-0.12039	1.98699	0.347188	4.24026	-0.763649	-0.0474042	0.0769293	0.13976	0.0683721	1.87115	0.380329	4.3388	0.033141	0.645911	-0.642928	-0.114648	-0.0339178	-0.106107	-0.38822	1.91454	0.167461	3.7436	-0.179727	0.591682
YOR027W	P15705	STI1	RBP	3	0.0813621	0.170052	0.0550649	-0.160809	-0.145671	1.0561	1.27173	8.04838	-1.62203	-0.338117	0.00160505	0.157877	0.162424	1.12866	0.992977	6.63429	-0.278756	0.209206	-1.68441	-0.660963	-0.666258	-0.287469	NA	1.14272	0.116134	3.61276	-1.1556	0.00853147
YDL084W	Q07478	SUB2	RBP	3	0.498576	0.21134	-0.0651581	-0.327577	-0.31718	1.34385	1.01396	6.73149	-0.0894393	-0.049861	0.080033	0.0663698	0.8573	1.57953	0.961911	6.49296	-0.0520499	0.498438	-0.173037	0.0288781	0.097863	0.510251	NA	1.61913	0.518924	4.77629	-0.495036	0.225151
YLR354C;YGR043C	P15019;P53228	TAL1;NQM1	RBP	3	0.335396	0.329915	-0.165817	-0.297803	-0.201691	1.13149	1.21705	7.74905	-1.73282	-0.421808	-0.33026	-0.350777	-0.43862	1.21897	0.531524	4.81818	-0.685529	0.0217743	-1.34503	-0.41497	-0.350362	-0.0920454	-1.29059	0.819247	0.892266	6.18696	-0.324788	0.396633
YJL052W	P00360	TDH1	RBP	3	0.371718	0.263928	0.00294278	-0.469279	-0.136789	1.62302	0.735531	5.55003	-1.05931	-0.100823	-0.468249	-0.179587	NA	2.0866	-0.492932	2.3686	-1.22846	0.000232831	-0.68615	-0.807345	-0.481273	0.95945	NA	2.43973	-0.493426	2.36779	-1.22896	0.00530867
YBR118W	P02994	TEF2	TF	3	0.375177	0.0868879	-0.22213	0.00461664	-0.244551	0.969627	1.37055	8.61899	0.590783	-0.147135	-0.504356	-0.517768	-0.796071	0.545567	1.58814	10.0221	0.217591	0.99085	0.25194	-0.359047	-0.50697	-0.484836	-1.33201	0.804924	1.11574	7.22355	-0.254811	0.485487
YKL081W	P36008	TEF4	TF	3	0.646603	0.286093	-0.108405	-0.270382	-0.553908	1.07776	1.30703	8.24774	-0.450296	-0.0577124	-0.00757875	-0.24012	-0.0957804	0.859984	1.30025	8.20907	-0.00678163	0.574541	-0.287247	0.121076	-0.112788	0.0464169	-0.556611	0.780735	1.40336	8.81721	0.0963219	0.955419
YHR025W	P17423	THR1	RBP	3	0.471575	0.0970645	0.0800066	-0.227231	-0.421415	1.53297	0.821543	5.89098	-1.44686	-0.509406	-0.284324	-0.169775	NA	1.59729	-0.122494	3.06199	-0.944037	0.00313404	-1.40522	-0.06261	-0.330293	0.0256165	NA	1.3365	0.318107	4.15565	-0.503435	0.218336
YCR053W	P16120	THR4	RBP	3	0.676635	0.357579	-0.132368	-0.45977	-0.442076	1.75654	0.637207	5.18438	-1.01073	-0.341103	-0.208576	-0.162825	-0.350883	1.66981	0.26697	4.01093	-0.370237	0.136406	-0.63684	-0.234927	-0.0778855	-0.0774573	-0.372385	1.42434	0.632425	5.16723	-0.0047813	0.872071
YIL078W	P04801	THS1	RBP	3	0.129995	0.795505	-0.041705	-0.540399	-0.343395	0.937957	1.46183	9.18191	-0.612036	0.212918	-0.0760825	-0.126536	-0.327299	0.7891	1.37278	8.63232	-0.0890447	0.440469	-0.68231	0.19637	-0.232457	-0.102216	-0.42603	0.797225	1.30579	8.24065	-0.156035	0.627275
YJL138C	P10081	TIF2	TF	3	0.0673864	0.183696	0.0748374	-0.240283	-0.0856372	0.88879	1.44056	9.04755	-0.984904	-0.384225	-0.0750879	-0.0493354	0.108116	0.889604	1.20292	7.6735	-0.237642	0.249821	-0.935064	-0.1112	0.125197	0.278111	0.0131392	0.790053	1.46129	9.17846	0.0207243	0.915342
YKL056C	P35691	TMA19	RBP	3	0.669507	0.265135	-0.129241	-0.196689	-0.608713	0.465448	1.92272	12.6379	-0.580297	-0.113623	-0.393767	-0.53857	NA	0.503997	1.10135	7.15183	-0.821373	0.00826366	-0.203487	0.142001	-0.219387	-0.578124	NA	0.206721	1.6009	10.1111	-0.321818	0.400191
YDR050C	P00942	TPI1	RBP	3	0.633978	0.251349	-0.165883	-0.217491	-0.501952	1.09975	1.27869	8.0873	-0.897912	-0.195521	-0.456562	-0.79165	-0.333319	1.18376	0.627729	5.15044	-0.650964	0.0273817	-0.596001	-0.107929	-0.392079	-0.483183	-0.307843	0.931217	1.0229	6.77332	-0.255795	0.484167
YGL026C	P00931	TRP5	RBP	3	0.146084	0.165406	0.00682451	0.00441544	-0.321023	1.88123	0.451148	4.55709	-0.939651	-0.144811	-0.110743	0.47252	-0.736589	1.95091	0.16667	3.74155	-0.284478	0.203956	-0.931505	-0.719297	-0.431854	-0.274837	NA	1.78048	-0.347761	2.61934	-0.798909	0.0621886
YDR353W;YHR106W	P29509;P38816	TRR1;TRR2	RBP	3	0.427006	0.314778	-0.0198825	-0.471085	-0.250816	1.10834	1.25242	7.94135	-1.35281	-0.183741	0.0363384	0.0329702	-0.112479	1.32425	0.761704	5.65164	-0.490715	0.0723509	-0.819929	-0.111149	-0.16307	0.282757	NA	1.29628	0.552506	4.88877	-0.699913	0.0984249
YML028W;YDR453C	P34760;Q04120	TSA1;TSA2	RBP	3	0.258436	0.0883816	0.159602	-0.129031	-0.377388	1.28835	1.05096	6.90637	-0.920039	-0.164351	-0.416747	-0.215694	-0.227592	1.16705	0.790909	5.76722	-0.260053	0.227046	-0.879356	-0.291434	-0.078538	-0.35478	-0.158992	0.951315	1.04339	6.87023	-0.00756924	0.867362
YGR185C	P36421	TYS1	RBP	3	0.390372	0.626157	0.265747	-0.380806	-0.901471	1.13305	1.28913	8.14601	-0.215536	0.624007	0.379383	-0.548867	NA	1.02749	1.10565	7.17318	-0.18348	0.311298	-0.378656	0.907739	0.69611	-0.671165	NA	0.75913	1.5317	9.63757	0.242576	0.711596
YKL216W	P28272	URA1	NA	3	0.190373	0.251702	0.0714056	-0.0663811	-0.596133	1.5803	0.741332	5.57239	-0.485795	-0.0289467	-0.13489	-0.550823	0.170116	1.62078	0.520898	4.78283	-0.220434	0.268359	-0.102755	0.363989	-0.133458	-0.376957	NA	1.55298	0.410473	4.43041	-0.330859	0.389416
YML106W;YMR271C	P13298;P30402	URA5;URA10	RBP	3	0.376555	0.0883745	0.045636	-0.587946	0.154762	1.2047	1.16604	7.47984	-1.31486	-0.409424	-0.505807	-0.22097	NA	1.27493	0.167161	3.74282	-0.99888	0.00197281	-1.10407	-0.515633	-0.214063	-0.427549	NA	1.11066	0.359395	4.27629	-0.806646	0.0598972
YGR094W	P07806	VAS1	RBP	3	-0.035351	0.168478	-0.120471	-0.0844414	0.0717856	1.73117	0.59471	5.0339	-1.21135	-0.667655	0.0696506	-0.141763	-0.865703	1.87673	-0.0424067	3.23678	-0.637117	0.0299554	-1.46011	-0.613636	-0.212146	0.0114431	-0.481117	1.74393	0.105931	3.58729	-0.488779	0.230326
YDL185W	P17255	VMA1	RBP	3	0.0577058	0.16796	-0.00596471	-0.255446	0.0357451	1.16568	1.16286	7.46334	-1.02259	-0.28328	0.085939	0.361464	0.540236	0.913638	1.44089	9.04961	0.278035	0.868325	-1.18234	-0.206677	0.0863595	0.295224	0.387228	0.935559	1.35834	8.54636	0.195489	0.788175
YBR127C	P16140	VMA2	RBP	3	0.14875	0.107513	0.0396713	-0.16699	-0.128945	1.04172	1.2857	8.12666	-1.02166	-0.0453873	0.182227	0.134805	-0.000660772	0.702617	1.52811	9.61358	0.242411	0.940344	-1.087	-0.12687	0.195549	0.113888	-0.469141	0.748285	1.36816	8.60472	0.0824666	0.979118
YKL080W	P31412	VMA5	RBP	3	0.361679	0.301449	0.018197	-0.220732	-0.614125	0.561702	1.77214	11.3853	-0.926385	0.00435328	-0.106681	-0.209847	NA	0.172598	1.55969	9.82637	-0.212445	0.277279	-0.792442	-0.0457659	0.215961	-0.0201472	NA	0.145086	1.74	11.1345	-0.032136	0.826087
YOR230W	Q12363	WTM1	RBP	3	0.569088	0.203741	-0.348785	-0.298279	-0.283948	2.21723	0.120498	3.6237	-1.01196	-0.263637	0.102486	0.515417	NA	2.37888	-0.440827	2.45571	-0.561325	0.0480217	-1.02485	-0.235406	0.112527	0.954594	NA	2.25975	-0.135406	3.03471	-0.255904	0.484021
YDL124W	Q07551	YDL124W	RBP	3	0.73767	0.398397	0.118283	-0.682681	-0.542099	1.0256	1.40221	8.8102	-1.03382	-0.154038	-0.228089	-0.397876	NA	0.978757	0.606151	5.07398	-0.796058	0.0099814	-0.715184	-0.132019	-0.0557339	-0.627967	NA	0.781897	0.864668	6.06974	-0.537541	0.192184
YDR341C;YHR091C	Q05506;P38714	YDR341C;MSR1	RBP	3	0.0101845	0.157815	0.159353	-0.100528	-0.226825	2.17408	0.155526	3.71276	-1.48529	-0.49487	0.0811974	0.0241374	-0.396685	2.20143	-0.237526	2.82733	-0.393053	0.121728	-1.72256	-0.463381	-0.0827279	-0.376514	NA	2.09668	-0.640994	2.13757	-0.796521	0.0629105
YGR234W	P39676	YHB1	RBP	3	0.343908	0.498156	-0.000571822	-0.630111	-0.211382	0.860085	1.51594	9.53282	-1.56321	-0.420344	-0.477773	-0.518571	NA	1.04839	0.274576	4.03213	-1.24136	0.000204513	-1.31153	-0.209354	-0.271149	-0.0352098	NA	0.812741	0.80661	5.83032	-0.709328	0.0943788
YHR020W	P38708	YHR020W	RBP	3	-0.0857315	0.277337	-0.136956	0.0200391	-0.0746879	1.8984	0.43136	4.49501	-0.679546	-0.329485	0.19191	0.120463	-0.286192	1.9165	0.243649	3.94661	-0.187711	0.306164	-1.16326	-0.447381	-0.245109	-0.0986871	NA	1.75036	-0.185972	2.93019	-0.617332	0.140119
YLR179C	Q06252	YLR179C	RBP	3	0.526068	0.645204	-0.157016	-0.737646	-0.276611	0.794894	1.61818	10.2329	-1.27045	-0.664587	-0.43663	-1.01831	NA	0.808859	0.378878	4.33443	-1.2393	0.000208805	-0.942131	-0.101854	-0.0657984	-0.27608	NA	0.42982	1.2633	8.00146	-0.354884	0.36165
YMR099C	Q03161	YMR099C	RBP	3	0.96526	0.528451	-0.0335485	-0.731543	-0.737007	1.41018	1.06854	6.99104	-1.14347	0.151249	-0.358274	-0.974177	NA	1.25839	0.253745	3.97433	-0.814797	0.00868239	-0.610125	-0.183266	-0.218186	-1.10856	NA	0.904293	0.611344	5.09227	-0.457198	0.257737
YMR226C	Q05016	YMR226C	RBP	3	0.519973	0.126348	-0.0121511	-0.424948	-0.21226	1.55345	0.804139	5.82035	-1.6752	-0.754579	-0.217786	0.211236	1.04978	1.6993	0.620783	5.1257	-0.183356	0.311449	-1.95396	-1.01099	-0.0323879	0.439503	NA	1.52411	0.102684	3.57923	-0.701455	0.0977528
YNL134C;YCR102C;YLR460C	P53912;P25608;P54007	YNL134C;YCR102C;YLR460C	RBP	3	0.848561	0.49145	-0.139701	-0.449919	-0.75039	1.69601	0.747804	5.59745	-0.420123	0.271513	-0.00706991	-0.400005	NA	1.64329	0.247119	3.95612	-0.500685	0.0684008	-0.16943	0.208159	-0.359014	-0.138527	NA	1.66066	0.239502	3.93528	-0.508302	0.214455
YPL225W	Q08971	YPL225W	RBP	3	-0.311062	-0.542017	0.0397868	0.318682	0.504557	0.576875	1.79794	11.5908	-1.31881	-0.94738	-0.944625	-0.881153	NA	0.569488	0.417423	4.4518	-1.38052	4.72857e-05	-1.23101	-1.06002	-0.149625	-0.369004	NA	0.621107	0.747072	5.59461	-1.05087	0.0161474
YNL241C	P11412	ZWF1	RBP	3	0.479699	0.313874	-0.145995	-0.453042	-0.231034	2.24575	0.111456	3.60106	-2.33316	-0.853967	0.0974961	0.394408	1.21904	1.75512	0.694818	5.3956	0.583362	0.344498	-2.62985	-0.329302	-0.520998	-0.156016	NA	1.9907	-0.639146	2.14031	-0.750602	0.0781878
YOR198C	P38934	BFR1	RBP	4	-2.14263	0.00655853	0.392785	0.851446	0.891844	-3.03006	5.66321	168.918	-0.715451	1.02421	2.30269	2.23869	1.61307	-3.3097	7.25037	507.525	1.58716	0.000451316	-0.6987	1.84006	2.56979	2.53765	0.412692	-2.88952	6.99981	426.612	1.3366	0.00658545
YBR106W	P38264	PHO88	NA	4	-0.801671	0.133262	0.328978	0.439876	-0.0242676	-1.20482	3.60163	40.4648	-1.25242	1.0098	1.41396	1.55697	NA	-1.64038	4.64765	83.5528	1.04602	0.0334596	-0.434557	1.74129	1.83297	1.05313	NA	-1.62379	4.9049	99.8618	1.30327	0.00815508
YJL080C	P06105	SCP160	RBP	4	-2.35114	-0.062348	0.3884	0.974087	1.051	-1.88637	4.58659	80.0903	-1.63145	0.808244	2.14609	2.44837	1.6262	-1.88263	5.79385	184.927	1.20726	0.0111431	-1.41766	1.00087	1.92899	2.13053	0.861864	-1.4513	5.08119	112.842	0.494603	0.362572
YOR298C-A	O14467	MBF1	RBP	5	-0.944715	0.550426	0.00817476	0.166834	0.21928	-4.92683	7.32641	534.991	-2.51348	-1.50162	-0.311236	-0.268845	-0.711882	-5.21022	6.68258	342.402	-0.643827	0.0286834	-1.5044	-0.0710731	-0.0329229	-0.0607378	0.532971	-4.84542	7.07425	449.2	-0.252156	0.489057
YER151C	Q01477	UBP3	RBP	5	-2.39745	-1.35875	-0.0552676	1.35545	1.25729	-3.35184	6.05036	220.912	-2.44778	-0.700434	1.01936	1.41274	NA	-3.74246	6.19877	244.847	0.148409	0.868819	-2.85974	-0.44557	0.977019	1.37612	NA	-3.28198	5.72456	176.256	-0.3258	0.395423
YHR013C	P07347	ARD1	NA	6	-0.883363	-0.398587	0.426173	0.34325	0.512528	-2.39304	4.80976	93.4888	-0.307223	-0.431416	0.0481924	0.497706	NA	-2.30475	4.30318	65.8061	-0.506571	0.0661532	-1.11932	-0.800789	0.0164736	0.276505	NA	-2.50607	4.20966	61.6753	-0.6001	0.150328
YCR093W	P25655	CDC39	RBP	6	-1.97893	-0.432159	0.377967	0.990688	1.04244	-2.19468	4.85943	96.7636	-1.65286	-0.596059	1.11452	0.607204	NA	-2.18741	4.41024	70.8752	-0.449184	0.0908618	-2.09556	-0.10256	1.35321	1.07468	NA	-2.1175	4.66011	84.2778	-0.199313	0.562976
YMR012W	Q03690	CLU1	RBP	6	-2.00771	-1.02128	-0.161453	1.09333	2.09711	-2.21285	5.22142	124.361	-0.364431	-0.0497338	1.08508	1.56696	1.12266	-2.11686	5.28754	130.192	0.066117	0.707468	-0.55855	0.235656	1.06499	1.3766	-0.0804903	-2.28471	5.18985	121.669	-0.0315711	0.827032
YHR216W;YAR073W	P38697;P39567	IMD2;IMD1	RBP	6	-0.745523	0.214014	0.0114625	0.350588	0.301104	-1.13978	3.538	38.7188	-0.246011	1.21261	1.90635	1.54343	NA	-1.62036	4.91671	100.683	1.37871	0.00292116	-1.18598	0.131967	-0.228124	0.0547068	NA	-1.21819	2.99543	26.5824	-0.542565	0.188535
YLR432W;YAR075W	P50095;O42831	IMD3;YAR075W	RBP	6	0.0344943	-0.1005	-0.0152814	0.261198	-0.179911	-1.05203	3.3819	34.7482	0.224349	1.27444	1.2297	0.865111	-0.319884	-1.09027	4.18706	60.7167	0.805155	0.130642	-1.57715	-0.505979	-0.553338	-1.00807	-1.49561	-1.41719	2.78043	22.9018	-0.601474	0.149494
YML056C	P50094	IMD4	RBP	6	-0.73153	0.348758	0.119665	0.28326	-0.0201531	-2.44408	4.81292	93.6943	-0.852878	0.662731	1.18659	0.968147	0.121616	-2.56211	5.46074	146.799	0.647812	0.267059	-2.36768	-0.639108	-0.639043	-0.491646	-1.59126	-2.48153	3.81558	46.9336	-0.997341	0.0219799
YHR121W	P38828	LSM12	RBP	6	-1.46295	0.173744	0.333943	0.497332	0.610569	-1.98458	4.49292	75.0555	-1.34129	0.242691	0.195479	0.348191	NA	-2.0155	4.01403	53.8545	-0.478893	0.077275	-1.41775	-0.323519	0.243666	-0.0284357	NA	-1.69281	3.43174	35.9697	-1.06118	0.0151955
YBR084W	P09440	MIS1	RBP	6	-1.93788	-0.482029	0.523418	1.01168	0.884819	-2.42612	5.07622	112.453	-0.507835	0.233731	0.307476	0.372367	-0.425113	-2.42492	4.79116	92.2912	-0.28506	0.203428	-0.985489	-0.218795	0.355194	0.539173	-1.1688	-2.57077	4.75392	89.9396	-0.322297	0.399617
YDL040C	P12945	NAT1	RBP	6	-1.03356	-0.257187	0.214439	0.625122	0.451186	-2.57824	5.00985	107.398	0.0749093	-0.393673	0.193742	-0.0272992	-1.21741	-2.71123	4.83871	95.3839	-0.171146	0.326586	-0.437811	-0.325815	0.0223387	-0.084972	NA	-2.84091	4.646	83.457	-0.363859	0.351604
YER165W	P04147	PAB1	TF	6	-0.972327	0.564633	0.397366	0.217099	-0.206772	-2.76865	5.18405	121.18	-1.48614	-0.0768994	0.27143	0.163327	-0.56966	-2.6713	4.77755	91.4249	-0.406497	0.113675	-1.12018	0.192195	0.149818	-0.068994	-1.19625	-2.59007	4.62628	82.3244	-0.557765	0.177807
YAL036C	P39729	RBG1	NA	6	-1.51803	0.182244	0.411803	0.407632	0.516352	-3.14572	5.62366	164.35	-1.4635	0.201172	0.609979	0.77164	0.0835492	-3.12491	5.66228	168.809	0.0386224	0.655991	-1.54393	0.414061	0.876491	0.997522	-0.248077	-3.37763	6.04436	219.995	0.420702	0.452106
YPL198W	Q12213	RPL7b	RP	6	-1.01373	-0.533749	-0.311552	1.44016	0.57465	-3.4066	6.03762	218.969	0.917712	1.2617	-0.259607	0.456935	NA	-3.43659	6.13588	234.403	0.0982631	0.769379	-0.0164176	0.50504	0.882219	0.479266	NA	-2.86268	5.35968	136.868	-0.67794	0.108408
YOR091W	Q12000	TMA46	RBP	6	-1.17191	0.271938	-0.0511978	0.711413	0.226956	NA	NA	NA	-1.21429	0.468892	0.49433	0.360119	NA	NA	NA	NA	NA	NA	-0.822807	0.34961	0.768766	0.339464	NA	NA	NA	NA	NA	NA
YGL173C	P22147	XRN1	RBP	6	-0.981934	0.269958	0.162683	0.269456	0.279837	-2.40833	4.80088	92.9153	-1.45763	-0.501089	0.447636	0.187474	-0.674364	-2.32928	4.39962	70.3552	-0.40126	0.116761	-1.41653	-0.0689586	0.336313	-0.0379409	NA	-2.4998	4.3335	67.2038	-0.467374	0.248668
YGR204W	P07245	ADE3	RBP	7	-0.688067	-0.239743	0.0888642	0.413455	0.42549	-2.36106	4.74124	89.1527	0.538238	-0.540914	-0.649598	-0.627525	-1.26651	-2.55708	4.49817	75.3289	-0.243074	0.244159	0.299773	-0.484832	-0.538522	-0.426178	-1.83934	-2.52585	4.39678	70.2169	-0.344461	0.37354
YOL139C	P07260	CDC33	TF	7	-0.500345	0.532459	0.274397	0.133751	-0.440261	-2.29814	4.67581	85.1996	-1.38596	-0.360323	-0.531048	-0.864841	NA	-2.07609	3.3408	33.7721	-1.33501	7.73481e-05	-1.20678	-0.0969629	-0.256908	-1.00556	NA	-2.57537	4.01003	53.7056	-0.665774	0.11427
YOR204W;YPL119C	P06634;P24784	DED1;DBP1	TF	7	-0.124807	0.290326	-0.096808	-0.000180944	-0.0685304	-1.66334	3.9935	53.0937	0.109484	-0.35796	-0.257458	-0.0416582	-0.801667	-1.84799	3.93236	50.8905	-0.0611433	0.483823	-0.156743	-0.466712	-0.218123	-0.190043	-0.487965	-1.57849	3.6035	40.5174	-0.389998	0.323364
YHR193C	P38879	EGD2	RBP	7	0.107363	0.144212	-0.170845	-0.0631351	-0.017595	-2.66664	4.99311	106.158	0.0355829	-0.76271	-0.856494	-0.754789	-0.944891	-2.84037	4.55352	78.2755	-0.439583	0.0956419	-0.126768	-0.544843	-0.562873	-0.335413	-0.681373	-2.39047	4.27582	64.5697	-0.717286	0.0910635
YBR026C	P38071	ETR1	NA	7	-0.0432231	-0.171363	0.00910043	0.085055	0.12043	-2.46838	4.79394	92.4698	0.809264	-0.209717	-0.790558	-0.966181	NA	-2.47549	4.36575	68.7226	-0.428198	0.10157	-0.161863	-0.816625	-0.95341	-1.21727	NA	-2.7501	4.01802	54.0038	-0.77592	0.0694284
YBL002W;YDR224C	P02294;P02293	HTB2;HTB1	NA	7	-0.0873358	0.153759	0.271854	0.116521	-0.454799	-2.25224	4.59559	80.5916	-0.571399	-0.268969	0.230059	0.0937056	NA	-2.53488	4.43902	72.3033	-0.156567	0.345276	-0.860412	0.141848	0.247981	-0.511711	NA	-2.21238	4.03737	54.7328	-0.558222	0.177491
YLR244C	Q01662	MAP1	RBP	7	0.30006	0.272281	-0.281918	-0.160914	-0.12951	-2.20027	4.54226	77.6669	0.807208	-0.736012	-0.744859	-0.798554	NA	-2.36508	4.18142	60.4799	-0.360846	0.14283	0.684594	-0.55355	-0.413119	-0.766614	NA	-2.27449	4.13342	58.5009	-0.408842	0.303949
YHL034C	P10080	SBP1	RBP	7	-0.0440943	0.248353	-0.00687081	-0.111993	-0.0853947	-2.43992	4.76785	90.8122	-0.307426	0.326684	0.238449	-0.270826	NA	-2.53401	4.55932	78.5905	-0.208532	0.281721	-0.46422	0.327428	0.085073	0.111007	NA	-2.34909	4.39186	69.9779	-0.375987	0.338312
YBR263W	P37292	SHM1	NA	7	0.345935	-0.349728	-0.281058	0.154955	0.129896	-1.85638	4.203	61.3912	0.257423	-0.0588009	-0.741222	-0.866704	-1.77577	-2.0473	3.89292	49.5182	-0.310073	0.181645	-0.640078	-0.929296	-1.35626	-1.47091	NA	-2.26647	3.20618	30.7634	-0.996818	0.022045
YCL037C	P25567	SRO9	RBP	7	-0.404989	0.657794	-0.0319397	0.128554	-0.349418	-3.0098	5.38529	139.32	-0.787349	-0.11909	-0.166047	-0.28554	-1.6389	-3.44027	5.26116	127.834	-0.124129	0.389251	-0.509737	0.231162	0.26243	-0.0512872	-2.07729	-3.15811	5.25493	127.283	-0.130359	0.666851
YPL237W	P09064	SUI3	TF	7	0.253599	0.409377	0.0245958	-0.20202	-0.485552	-1.90555	4.26198	63.9534	0.557153	-0.314064	-0.211831	-0.646654	NA	-1.65022	3.56782	39.5274	-0.694168	0.0205399	0.555592	-0.192968	-0.275504	-0.243403	NA	-2.02495	4.03053	54.4739	-0.231456	0.517378
YGR162W	P39935	TIF4631	TF	7	-0.613692	0.988527	0.28203	0.062363	-0.719229	-2.54948	5.01027	107.429	-1.70489	-1.40595	-0.867837	-1.02289	NA	-2.38187	3.1678	29.9559	-1.84247	1.53719e-07	-0.775608	0.0379478	-0.0140939	-0.0671814	NA	-2.46388	4.29396	65.3866	-0.716312	0.0914641
YLR167W;YIL148W;YKR094C;YLL039C	P05759;P0CH09;P0CH08;P0CG63	Ubiquitin	NA	7	-0.226925	-0.160742	-0.0228147	0.173452	0.23703	-1.7329	4.06622	55.8385	0.102372	-0.372359	-0.545439	-0.730417	-1.38564	-1.89597	3.71019	43.6271	-0.356035	0.146209	0.817763	0.363362	0.623222	-0.0077962	-1.11493	-1.793	4.38892	69.8353	0.322696	0.588078
YGR054W	P53235	YGR054W	RBP	7	-0.773746	0.209075	0.176537	0.600307	-0.212173	-2.15102	4.54342	77.729	0.265069	0.317669	0.137341	-0.313705	NA	-2.28814	4.40997	70.8618	-0.133444	0.376288	0.0551181	0.0142145	0.0177941	-1.58762	NA	-2.19565	3.95862	51.8254	-0.584794	0.159863
YDR381W	Q12159	YRA1	RBP	7	0.553674	0.209297	-0.368127	0.0745468	-0.469392	-2.98212	5.35341	136.275	0.736377	0.208829	-0.0145842	-0.502831	NA	-3.03103	5.20652	123.083	-0.146888	0.358054	0.00277565	-0.0418084	-0.165726	-0.761606	NA	-2.78399	4.57254	79.314	-0.780873	0.0678127
YCR088W	P15891	ABP1	RBP	8	-0.174957	0.301577	0.0928774	-0.240899	0.0214029	0.807849	1.52727	9.60803	-1.18053	-0.345293	0.0453054	0.172456	0.367728	0.399974	1.82577	11.8166	0.298499	0.827402	-0.874941	-0.173414	0.229169	0.43337	NA	0.425713	1.55781	9.81352	0.0305305	0.932053
YGL148W	P28777	ARO2	RBP	8	0.0961564	0.285674	-0.128091	-0.286484	0.0436584	0.622585	1.71472	10.9411	-0.901758	-0.56911	-0.240374	0.0439637	NA	0.555324	1.07076	7.00179	-0.643958	0.0286589	-1.02743	-0.656698	-0.237417	0.414027	NA	0.381543	1.34336	8.45804	-0.371359	0.343345
YDR321W	P38986	ASP1	NA	8	-0.289769	0.56405	-0.224689	-0.164967	0.059202	-0.261359	2.60791	20.3206	-1.15781	0.13379	1.32652	1.36263	2.49984	-0.0200564	3.63843	41.5101	1.03052	0.0368934	-1.43255	0.28996	0.727945	1.16684	1.69793	-0.143798	3.27125	32.1828	0.663343	0.203184
YIL142W	P39076	CCT2	RBP	8	0.23319	-0.0430102	-0.0312437	-0.157852	-0.00108387	0.460775	1.86698	12.159	-0.277672	-0.132263	0.260477	0.139976	0.250294	0.634084	1.75177	11.2257	-0.115212	0.401913	-0.542804	-0.00733689	0.339751	0.424172	NA	0.602267	1.49827	9.41682	-0.368707	0.346251
YJL014W	P39077	CCT3	RBP	8	0.0522785	-0.207526	-0.0645454	0.0782512	0.141542	0.423838	1.90327	12.4687	-0.696295	-0.389667	0.360986	0.442115	NA	0.226119	1.78228	11.4657	-0.120991	0.39368	-0.932322	-0.371395	-0.18453	0.26698	NA	0.32333	1.43381	9.0053	-0.469463	0.246835
YDL143W	P39078	CCT4	RBP	8	0.107353	0.0124851	-0.0598941	-0.213451	0.153507	0.500294	1.8274	11.8299	-0.335421	-0.163642	0.060645	0.24316	NA	0.2148	1.75305	11.2356	-0.0743533	0.463014	-0.64015	-0.419781	-0.0353047	0.28354	NA	0.376089	1.46475	9.20053	-0.362647	0.35295
YJL111W	P42943	CCT7	RBP	8	0.0298584	0.0750876	-0.00138158	-0.1635	0.0599356	0.270445	2.05398	13.8416	-0.950146	-0.307479	0.054246	0.280629	0.357031	-0.0504754	2.33127	16.775	0.277294	0.869814	-1.33161	-0.427614	0.0312488	0.492363	NA	0.00448281	1.83122	11.8613	-0.222755	0.52953
YJL008C	P47079	CCT8	RBP	8	-0.0321372	-0.0312286	-0.0635794	-0.00354572	0.130491	0.279729	2.04383	13.7446	-0.450853	-0.206572	0.2284	0.535251	0.623893	0.244009	2.28205	16.2123	0.23822	0.948863	-0.768101	-0.203249	-0.000125756	0.374667	NA	-0.0317364	1.93949	12.7856	-0.104343	0.707918
YDL145C	P53622	COP1	RBP	8	0.46426	0.0631475	-0.106952	-0.210567	-0.209889	0.385835	1.95948	12.964	-0.324191	-0.11458	0.314764	0.0218657	NA	0.35104	1.64226	10.4052	-0.317213	0.175757	-0.651087	-0.119275	-0.0666691	0.0128502	NA	0.485181	1.3309	8.38532	-0.628575	0.133751
YOR046C	P20449	DBP5	RBP	8	-0.14626	-0.0488357	0.0213254	0.0155256	0.210993	-0.0516917	2.38898	17.4595	-0.399907	-0.189964	0.293474	0.414616	NA	-0.105025	2.17303	15.0323	-0.215945	0.273347	-0.103582	-0.0881799	0.283505	0.50745	NA	-0.0496447	2.22281	15.56	-0.166167	0.61194
YML008C	P25087	ERG6	RBP	8	0.245102	0.0859286	0.0727565	-0.281889	-0.162531	0.272156	2.05388	13.8407	-0.550038	0.418484	0.53703	0.359413	NA	0.128549	2.12041	14.494	0.0665389	0.708269	-0.206265	0.314847	0.488976	0.948717	NA	0.278932	2.1658	14.9572	0.111929	0.928771
YDL022W	Q00055	GPD1	RBP	8	0.0432546	0.158037	-0.0718333	0.0441188	-0.173577	0.282188	2.04416	13.7477	-0.740694	-0.217792	0.375921	0.536184	NA	0.598823	1.47367	9.25759	-0.570484	0.0454397	-0.616263	0.0164332	0.545522	-0.129952	NA	0.436889	1.57647	9.94134	-0.467681	0.248398
YJL034W	P16474	KAR2	RBP	8	-0.153123	0.0096095	0.0501041	-0.198949	0.292358	0.547069	1.78554	11.4916	-0.319468	0.371127	0.903491	0.841231	NA	0.780336	1.74495	11.1728	-0.0405833	0.517195	0.12732	0.783873	0.742704	0.831992	NA	0.350752	2.29713	16.3826	0.511591	0.343677
YGR086C	P53252	PIL1	RBP	8	0.025676	0.0762948	-0.0646212	0.0420246	-0.158748	0.857667	1.45087	9.11245	-0.633587	0.0920011	-0.0820706	0.384637	NA	0.506261	1.47948	9.29492	0.0286031	0.637615	-0.889182	-0.131735	-0.137259	0.579722	NA	0.417241	1.53004	9.62643	0.0791616	0.984775
YJL001W	P38624	PRE3	NA	8	-0.110913	0.179697	-0.118306	-0.260669	0.310191	0.0118625	2.3257	16.7103	-1.02997	-0.0181736	0.193959	0.429477	NA	0.155714	1.83264	11.873	-0.493061	0.0714052	-1.02831	0.0230159	0.356142	0.719299	NA	0.00841324	2.13979	14.6899	-0.185916	0.582539
YOL038W	P40303	PRE6	RBP	8	0.549285	0.0508053	0.131972	-0.458922	-0.240147	0.472171	1.89777	12.4212	-0.946085	-0.233766	-0.282829	0.590839	NA	0.265027	1.62154	10.2568	-0.276222	0.211562	-1.0149	-0.145867	-0.276209	0.40921	NA	0.360455	1.46834	9.22347	-0.42942	0.28365
YPR010C	P22138	RPA135	RBP	8	-0.266199	-0.0397139	-0.0847551	0.247728	0.14294	-0.375519	2.7086	21.7895	0.154338	0.304312	0.979744	0.898332	NA	-0.348622	2.97711	26.2469	0.268511	0.887497	-0.490631	0.516719	1.04693	1.03802	0.904905	-0.100711	3.12474	29.075	0.416147	0.458005
YOR341W	P10964	RPA190	RBP	8	-0.22452	0.160955	-0.0991578	0.0713897	0.0913338	-0.60716	2.93587	25.5073	-0.1809	0.414776	1.20332	1.40048	NA	-0.690873	3.5304	38.5153	0.594523	0.330151	-0.596597	0.663544	1.14185	1.4823	NA	-0.143608	3.00076	26.6808	0.0648926	0.990798
YDL097C	Q12377	RPN6	NA	8	0.342866	0.0571739	-0.0145249	-0.324514	-0.0610003	0.507802	1.83015	11.8525	-1.1398	-0.300163	0.0781871	0.193508	NA	0.449636	1.34331	8.45775	-0.486843	0.0739348	-1.37577	-0.281162	-0.0424088	0.29354	NA	0.370552	1.39708	8.77894	-0.43307	0.280148
YKL145W	P33299	RPT1	RBP	8	-0.072363	0.280841	0.112624	-0.306232	0.0132859	0.645261	1.69535	10.7952	-0.958254	-0.525731	0.133988	0.480949	NA	0.560909	1.3275	8.36559	-0.36785	0.138017	-0.997211	-0.319058	0.128674	0.495399	NA	0.25379	1.67432	10.639	-0.0210334	0.844688
YDL007W	P40327	RPT2	RBP	8	0.172199	0.000470212	-0.030217	-0.34511	0.270366	0.30031	2.05011	13.8046	-0.681029	-0.295901	-0.054611	0.256497	NA	0.441466	1.40481	8.82611	-0.6453	0.0284103	-0.659254	-0.53964	-0.0215694	0.387698	NA	0.287647	1.56619	9.87075	-0.483919	0.234405
YNL287W	P32074	SEC21	RBP	8	0.382452	0.299165	-0.205354	-0.32712	-0.149143	-0.105256	2.45582	18.2875	-0.300956	-0.172715	0.282693	0.368177	NA	-0.309331	2.3818	17.3729	-0.074013	0.463544	-0.60853	-0.102685	0.0822819	0.0655234	NA	-0.179166	2.06369	13.9352	-0.392124	0.321134
YDR238C	P41810	SEC26	RBP	8	0.300436	0.197842	-0.442106	-0.281278	0.152772	-0.00228354	2.33832	16.8571	-0.587689	-0.259203	0.275264	0.431697	NA	-0.490921	2.5124	19.0189	0.174081	0.920649	-0.633289	-0.352497	-0.157213	-0.0892079	NA	0.0543424	1.65262	10.4801	-0.685696	0.104796
YAL005C	P10591	SSA1	RBP	8	0.200729	-0.0612349	-0.187405	-0.143857	0.191767	0.632589	1.69888	10.8216	-1.03245	-0.557136	-0.114544	0.115257	0.24091	0.180388	1.94298	12.8167	0.244106	0.936902	-0.949177	-0.652819	-0.187117	0.0272201	-0.0831844	0.375088	1.62323	10.2688	-0.0756454	0.754221
YLL024C	P10592	SSA2	RBP	8	0.0430895	0.102695	-0.127721	-0.132828	0.114764	0.599443	1.72658	11.0314	-0.902559	-0.445467	-0.0111006	0.132604	0.147303	0.46072	1.69807	10.8155	-0.0285146	0.537325	-1.0402	-0.368788	-0.346455	0.172325	-0.000190323	0.320793	1.74062	11.1393	0.0140391	0.903971
YIL137C	P40462	TMA108	NA	8	-0.313631	-0.0776092	-0.123183	0.252823	0.230804	0.176783	2.15533	14.849	-0.22601	-0.258864	0.0337943	0.118617	NA	0.046552	1.8795	12.2649	-0.275831	0.211927	-1.08739	-0.433619	-0.304395	-0.0434992	NA	-0.103164	1.68384	10.7094	-0.471492	0.245062
YGR209C	P22803	TRX2	RBP	8	0.15578	0.246044	0.195401	-0.436251	-0.160975	0.00118077	2.34322	16.9145	-1.31844	-0.147732	0.243104	0.139728	NA	0.131666	1.71186	10.9195	-0.631356	0.0310859	-0.907187	-0.334867	-0.082639	0.517912	0.840905	0.192262	2.26545	16.0269	-0.0777641	0.75077
YNL064C	P25491	YDJ1	RBP	8	-0.0541838	-0.0058372	-0.185538	-0.0435716	0.28913	-0.440565	2.77129	22.7573	0.0138419	0.264143	0.21357	0.497993	NA	-0.476558	2.73428	22.1809	-0.037007	0.523119	-0.460995	-0.317175	-0.0939094	-0.147455	NA	-0.337195	2.08949	14.1866	-0.681796	0.1066
YLR249W	P16521	YEF3	TF	8	-0.413253	-0.163623	-0.155428	0.338542	0.393762	0.165602	2.1905	15.2155	0.325088	-0.518949	-0.135776	0.0290278	-0.900016	0.021014	2.12205	14.5105	-0.0684499	0.472251	0.047019	-0.531017	-0.255282	-0.235305	-1.8835	0.0991718	1.78192	11.4628	-0.40858	0.304214
YEL025C	P39991	YEL025C	NA	8	-0.23181	-0.181507	0.268427	0.294743	0.0253396	NA	NA	NA	0.326198	0.59799	0.644618	0.672462	NA	NA	NA	NA	NA	NA	-0.0797055	0.852088	0.955347	1.08843	NA	NA	NA	NA	NA	NA
YNL135C	P20081	FPR1	RBP	9	0.189305	0.424185	0.184101	-0.413243	-0.384348	-0.537017	2.89744	24.8367	-1.44244	-0.296549	-0.0592962	-0.365738	-0.0126207	-0.360906	2.32779	16.7346	-0.569643	0.0456719	-0.71711	-0.0233572	0.178319	0.362177	0.0874649	-0.551213	2.89368	24.7721	-0.00375788	0.873801
YER025W	P32481	GCD11	TF	9	0.211652	0.42595	0.157047	-0.243245	-0.551403	-1.05246	3.41526	35.5611	-0.353111	-0.51154	-0.586356	-0.865886	-1.71537	-1.03422	2.62093	20.5049	-0.794334	0.0101092	-0.557111	-0.403918	-0.505553	-0.633135	-2.06979	-0.999178	2.59507	20.1407	-0.820188	0.0560553
YGL195W	P33892	GCN1	RBP	9	-0.641545	-0.00975729	0.0994127	0.264841	0.287049	-0.43348	2.79167	23.081	-1.35998	-0.52097	0.0519059	-0.0238632	NA	-0.456256	2.09165	14.2078	-0.700023	0.0197383	-1.64425	-0.491283	-0.0211599	-0.281436	NA	-0.253025	1.75867	11.2795	-1.033	0.017922
YIL041W	P40531	GVP36	RBP	9	0.467514	0.120839	-0.115056	-0.251264	-0.222034	-0.915236	3.26317	32.0031	-0.881203	-0.397345	-0.309124	-0.160547	0.134188	-0.949526	2.98566	26.403	-0.277508	0.210364	-0.553757	-0.0554661	-0.101326	0.0670667	0.56068	-1.07158	3.42158	35.7173	0.158412	0.849993
YPL226W	Q08972	NEW1	RBP	9	-0.736653	0.157861	0.0789236	0.168963	0.330906	-1.95699	4.3227	66.7021	-0.654252	-0.801061	-0.489493	-0.327855	NA	-1.99427	3.43699	36.1007	-0.885707	0.00502614	-0.842113	-0.746122	-0.47659	-0.383726	NA	-1.94707	3.34715	33.9211	-0.975549	0.0248353
YMR309C	P32497	NIP1	TF	9	-0.659668	0.460074	0.21886	0.0804718	-0.0997375	-1.40048	3.76869	45.4326	-0.951291	-0.852151	-0.551	-0.541404	-1.15444	-1.6913	3.22238	31.1108	-0.546313	0.0525198	-1.45776	-0.726059	-0.63167	-0.721064	NA	-1.59879	2.7498	22.4207	-1.01889	0.0194414
YBR025C	P38219	OLA1	RBP	9	-0.22612	-0.0592083	-0.0741357	0.142555	0.21691	-0.784371	3.11514	28.8821	-1.29661	-0.358327	-0.281677	-0.700438	1.65041	-0.840705	3.36787	34.412	0.252734	0.919398	-0.891856	-0.0442951	0.0264891	-0.0903856	4.01073	-0.747431	5.03918	109.603	1.92404	6.96309e-05
YGL008C;YPL036W	P05030;P19657	PMA1;PMA2	RBP	9	-0.159896	0.445162	0.29808	-0.150789	-0.432556	-1.19	3.54834	38.9973	-1.93357	-0.10589	0.484539	0.380429	0.36874	-0.89759	3.27141	32.1862	-0.276929	0.210902	-1.96465	-0.346632	-0.175585	-0.329126	NA	-0.925697	2.37145	17.2487	-1.17689	0.00745158
YNL055C	P04840	POR1	RBP	9	0.238208	0.198951	-0.110818	-0.435122	NA	-1.49734	3.49484	37.5777	-0.996397	-0.594373	0.0577641	-0.00310823	NA	-1.34411	3.02321	27.0991	-0.471632	0.0804324	-0.845304	-0.784973	-0.0555985	-0.0565338	NA	-2.06876	3.68263	42.8018	0.187795	0.800908
YOR361C	P06103	PRT1	TF	9	-0.709307	0.434543	0.204489	0.148138	-0.0778634	-1.6015	3.97194	52.3061	-1.30716	-0.716997	-0.359366	-0.600634	-1.56632	-1.73708	3.21688	30.9926	-0.755056	0.0134439	-1.56465	-0.737502	-0.652643	-0.766286	NA	-1.74263	2.85492	24.1154	-1.11702	0.0108495
YDR091C	Q03195	RLI1	TF	9	0.116146	0.262398	0.14818	-0.0791068	-0.447617	-1.6184	3.96078	51.9029	0.131725	-0.642481	-0.846001	-1.00349	NA	-1.53022	3.01117	26.874	-0.949605	0.00299265	-0.599419	-0.766852	-0.925702	-1.23289	NA	-1.49145	2.62869	20.6155	-1.33208	0.00262146
YBR079C	P38249	RPG1	TF	9	-0.52495	0.371436	0.285916	0.0844455	-0.216848	-1.59738	3.95592	51.7285	-0.719099	-0.841823	-0.494561	-0.593742	-1.06626	-1.65529	3.24762	31.66	-0.708299	0.018652	-1.31069	-0.742228	-0.678295	-0.666099	-1.2505	-1.76496	3.18523	30.32	-0.77069	0.0711687
YNL007C	P25294	SIS1	RBP	9	0.4862	0.0963094	-0.546207	-0.156121	0.159757	-1.11012	3.48004	37.1942	-0.987718	-0.932697	-0.282774	-0.743	NA	-1.57798	2.86938	24.3583	-0.61066	0.035454	-0.745987	-0.476885	-0.0671385	-0.226831	NA	-1.39163	3.03495	27.3205	-0.44509	0.268823
YJR104C	P00445	SOD1	RBP	9	0.443794	0.536744	-0.102585	-0.509826	-0.368126	-0.278316	2.66218	21.0996	-1.75802	-0.517801	-0.161157	-0.549179	-0.27508	0.0215202	1.74326	11.1597	-0.918925	0.00385043	-0.998554	-0.207686	-0.171047	0.0681429	-0.00915826	-0.324789	2.42801	17.9383	-0.234174	0.513611
YDL229W	P11484	SSB1	RBP	9	-0.807241	-0.100044	0.178574	0.300297	0.428415	-1.50465	3.88688	49.3111	-1.1927	-1.11772	-0.575442	-0.239283	-0.483307	-1.48343	3.13046	29.1905	-0.756416	0.0133139	-0.997406	-0.434179	-0.211035	-0.0616849	-1.00984	-1.35639	3.18813	30.381	-0.698745	0.0989365
YNL209W	P40150	SSB2	RBP	9	-0.988234	-0.0907368	0.164405	0.410747	0.503818	-1.98676	4.39579	70.1687	-1.0178	-0.921118	-0.148807	0.153631	-0.228003	-2.15202	4.11184	57.6324	-0.283947	0.20444	-1.29166	-0.407772	0.218763	0.282881	-0.693185	-1.8768	3.93377	50.9402	-0.462023	0.253409
YJR007W	P20459	SUI2	TF	9	0.569686	0.199919	-0.118965	-0.33926	-0.31138	-0.765468	3.13004	29.182	-0.684279	-0.571144	-0.666343	-0.805187	NA	-0.806928	2.12758	14.5661	-1.00246	0.00191288	-0.993859	-0.555059	-0.382524	-0.986661	NA	-1.14613	2.44156	18.1076	-0.688481	0.103523
YBR143C	P12385	SUP45	TF	9	-0.676509	0.181076	0.0942473	0.270098	0.131087	-1.21291	3.57129	39.6227	-0.863382	-0.546437	-0.358498	-0.499507	NA	-1.45217	2.89668	24.8236	-0.674614	0.0234261	-1.15052	-0.47591	-0.204671	-0.227196	NA	-1.458	2.98982	26.4792	-0.581466	0.161995
YPR163C	P34167	TIF3	TF	9	-0.745501	0.131189	0.0968312	0.184141	0.33334	-1.16583	3.53241	38.569	-1.10115	-0.7831	-0.534734	-0.35277	0.909615	-1.20174	3.33897	33.7294	-0.193437	0.299305	-0.85896	-0.289248	-0.171024	-0.120498	NA	-1.46225	3.13026	29.1865	-0.402142	0.310761
YMR146C	P40217	TIF34	TF	9	-0.266135	0.295542	0.205217	0.043831	-0.278455	-1.39104	3.73219	44.2976	-0.521816	-0.510455	-0.657668	-0.814112	NA	-1.49806	2.87722	24.491	-0.854975	0.00639339	-1.01255	-0.71643	-0.581224	-0.874613	NA	-1.43487	2.64779	20.8902	-1.0844	0.01323
YDR429C	Q04067	TIF35	TF	9	-0.456049	0.229337	0.23991	0.121323	-0.134521	-1.90752	4.25261	63.5391	-1.18603	-0.600638	-0.599193	-0.620399	-0.483532	-1.97173	3.6155	40.8557	-0.637108	0.029957	-1.36117	-0.447379	-0.238796	-0.328453	NA	-1.95237	3.42042	35.6884	-0.83219	0.0528239
YPR041W	P38431	TIF5	TF	9	-0.512032	0.287765	0.380172	0.0562509	-0.212156	-1.09893	3.4569	36.6023	-1.60765	-1.51654	-0.983258	-0.658399	-0.353252	-1.37401	2.75246	22.4622	-0.704435	0.0191525	-1.38722	-1.18839	-0.65753	-0.757281	NA	-1.15364	2.18691	15.1776	-1.26999	0.00403111
YFL038C	P01123	YPT1	RBP	9	1.15427	0.375378	0.133146	-0.725207	-1.25012	-0.915379	3.41233	35.4888	-0.728137	0.0146902	-0.442388	-0.540471	NA	-1.09383	2.69666	21.61	-0.715666	0.0177293	-0.148821	-0.138813	-0.393993	-0.849421	NA	-0.793796	2.43824	18.0661	-0.974084	0.0250382
YDL160C	P39517	DHH1	RBP	10	-0.854295	0.0169998	0.153662	0.353184	0.33045	-0.740579	3.12246	29.0291	-0.961247	-0.528024	0.246755	0.346717	NA	-0.882632	2.75657	22.5262	-0.365891	0.13935	-1.11225	-0.265013	0.450667	0.535625	NA	-0.91938	2.95887	25.9172	-0.163589	0.615826
YBL032W	P38199	HEK2	RBP	10	-1.23694	0.081812	0.311579	0.291261	0.552287	-1.87145	4.3081	66.0306	-0.676372	0.475847	0.755746	0.829989	NA	-1.66767	4.12255	58.0616	-0.185549	0.30878	-0.477845	-0.146819	0.277453	0.736656	NA	-1.38049	3.55031	39.0506	-0.757789	0.0756145
YNL132W	P53914	KRE33	RBP	10	0.106503	0.0596915	-0.0768065	-0.170389	NA	-0.683173	2.66708	21.1713	0.269577	0.387491	0.507306	0.56268	NA	-1.26541	3.70157	43.3672	1.03449	0.0359855	-0.180268	0.564512	0.549746	0.297261	NA	-0.990158	3.3276	33.4647	0.660527	0.205338
YDR432W	Q01560	NPL3	RBP	10	0.2864	0.386965	-0.159183	-0.172653	-0.341529	-1.17161	3.52188	38.2886	-0.529199	0.00255591	0.414467	0.281405	NA	-1.37319	3.45824	36.6365	-0.0636351	0.47986	-0.696788	-0.0960228	0.182386	0.10653	NA	-1.35173	3.26397	32.0209	-0.257904	0.481345
YNL016W	P32588	PUB1	RBP	10	-0.831151	0.360937	-0.284992	0.434884	0.320322	-0.793394	3.19051	30.4312	-1.00149	-0.0674151	0.205573	0.551283	NA	-1.37669	3.40255	35.2492	0.212042	0.997847	-1.45211	-0.0900007	0.145945	0.502862	NA	-1.12217	3.05894	27.7787	-0.13157	0.664962
YCL028W	P25367	RNQ1	NA	10	0.95156	-0.143594	-0.780124	-0.330034	-0.175739	NA	NA	NA	-0.370585	0.265906	0.544998	0.145284	NA	-2.36045	4.5434	77.7282	NA	NA	-0.690291	-0.639778	0.709801	0.425827	NA	NA	NA	NA	NA	NA
YPR110C	P07703	RPC40	RBP	10	0.101033	0.233857	-0.185867	-0.0177729	-0.180924	-0.706764	3.02798	27.1889	-0.0063201	0.343014	0.593377	0.717247	NA	-0.870552	3.30801	33.0132	0.280027	0.864323	0.0424791	0.748874	1.00762	0.976127	NA	-0.66757	3.40917	35.4113	0.381193	0.504685
YMR229C	Q05022	RRP5	RBP	10	0.135155	0.0427319	-0.501793	0.137911	0.00810766	-1.07344	3.37808	34.6563	0.551237	1.1707	1.83483	1.81938	NA	-1.261	4.69571	86.3832	1.31763	0.0048027	0.376187	1.34069	1.88325	1.87708	NA	-0.495546	3.98007	52.6017	0.601993	0.253913
YDR233C	Q04947	RTN1	RBP	10	-0.0719524	0.0352976	0.0119194	0.0692313	-0.0593278	-1.53092	3.85091	48.097	0.0980059	1.14416	0.946195	0.87955	NA	-1.25272	4.06974	55.9747	0.218826	0.988334	0.551143	1.3381	1.12014	0.61994	NA	-1.43713	4.38272	69.536	0.531812	0.322022
YDR190C	Q03940	RVB1	RBP	10	-0.0718624	0.141482	-0.114152	-0.0393568	0.0838897	-0.900566	3.22576	31.1838	-0.630438	-0.00822155	0.376625	0.291165	NA	-0.727772	2.78513	22.9766	-0.440632	0.0951101	-0.824502	0.0470757	0.241146	0.525282	NA	-0.86479	2.94169	25.6103	-0.284072	0.447082
YKL212W	P32368	SAC1	RBP	10	0.0307918	0.107388	0.0455971	-0.0451184	-0.15448	NA	NA	NA	-0.698618	0.552562	1.06773	0.894082	NA	NA	NA	NA	NA	NA	-0.232357	0.783609	0.840483	0.567748	NA	-1.47138	4.01872	54.0298	NA	NA
YOR270C	P32563	VPH1	RBP	10	0.477932	0.220524	-0.241071	-0.140722	-0.502574	-2.08696	4.41377	71.0487	-1.21047	0.587558	1.11414	0.691912	NA	-1.83937	4.3541	68.17	-0.0596707	0.486174	-0.991254	0.268233	0.293591	0.805976	NA	-1.84032	4.06725	55.8785	-0.346515	0.371177
YKR001C	P21576	VPS1	RBP	10	0.671533	0.625841	-0.128085	-0.457136	-0.712153	-0.909561	3.33978	33.7484	0.444791	1.20475	0.893801	0.363763	NA	-0.979286	3.74714	44.759	0.407358	0.619922	-0.132344	0.176478	-0.0305225	-0.58038	NA	-0.933943	2.81769	23.5011	-0.522092	0.20373
YPL037C	Q02642	EGD1	RBP	11	0.635641	-0.00398696	-0.851342	0.0396138	-0.0436829	-2.13473	4.48612	74.7027	1.57654	-0.487403	0.0894119	0.0996238	NA	-1.44133	3.98514	52.7869	-0.50098	0.0682866	2.22625	-0.106855	0.0233125	0.383939	NA	-1.03427	4.0214	54.1304	-0.464721	0.25101
YEL034W;YJR047C	P23301;P19211	HYP2;ANB1	TF	11	0.302576	0.0653961	-0.298219	-0.103968	0.034215	-1.01388	3.34943	33.9749	2.17699	0.324448	-1.00523	-1.33086	NA	-1.1242	3.86188	48.4643	0.512452	0.444703	2.49611	0.253526	-0.632456	-0.654861	NA	-0.939684	3.96009	51.8781	0.610656	0.246259
YKL009W	P33201	MRT4	RBP	11	1.52246	-0.0273629	-0.164984	-1.14075	-0.37871	-1.7757	4.35309	68.1224	2.08681	0.328812	-0.664064	-0.48217	NA	-2.18269	4.95902	103.679	0.605927	0.315897	2.4127	0.334685	0.0658624	-0.569066	NA	-1.43579	4.49004	74.906	0.136952	0.886226
YOR063W	P14126	RPL3	RP	11	-0.181432	-0.202553	-0.0609577	0.126985	0.317958	-1.76535	4.10107	57.2037	1.81414	0.521018	-0.194537	-0.55126	-1.17451	-2.00006	4.79723	92.6807	0.696161	0.217463	2.05344	0.624344	0.0991467	-0.130367	-0.836568	-1.58883	4.63098	82.5929	0.529909	0.324021
YLR185W	P49166	RPL37a	RP	11	-0.337573	-0.4505	-0.105817	0.210599	1.03551	-1.70765	4.20831	61.6179	1.06115	-0.118795	-0.0516595	0.866421	NA	-2.23952	4.77445	91.2287	0.56614	0.367404	2.79929	1.63598	1.71939	1.31773	NA	-1.62313	5.60996	162.797	1.40165	0.00428096
YHR141C;YNL162W	P0CX28;P0CX27	RPL42b;RPL42a	RP	11	-0.456721	0.305306	0.595161	-0.984795	0.365025	-2.47981	4.87711	97.957	1.64353	-0.29792	0.67446	0.383832	NA	-2.34381	5.1175	115.717	0.240384	0.944463	3.1834	0.499073	1.29551	1.15231	NA	-1.98228	5.90591	199.864	1.0288	0.0397174
YPL131W	P26321	RPL5	RP	11	0.204447	-0.37062	-0.0311799	0.256174	-0.0588213	-2.07111	4.40987	70.857	1.9316	0.616388	-0.405466	-0.861956	-1.25967	-2.18969	5.01153	107.523	0.601663	0.321179	1.92631	0.551378	-0.159221	-0.34932	0.12449	-1.81677	4.82341	94.3777	0.413537	0.461405
YDL130W	P10622	RPP1b	RP	11	-0.986227	-0.562781	0.585583	0.252484	0.569793	-2.04394	4.46563	73.6493	1.36467	0.0398625	-0.316619	-0.32438	NA	-1.94948	4.32932	67.0091	-0.136315	0.372346	2.45183	1.63139	0.821927	0.415972	NA	-1.77131	5.31619	132.804	0.850553	0.0940876
YOL039W	P05319	RPP2a	RP	11	-0.44373	-0.713721	-0.476174	0.412449	1.2316	-2.42799	4.94982	103.02	1.83995	0.128317	-0.436558	0.176983	NA	-2.25141	4.96123	103.838	0.011414	0.606608	2.59152	0.535758	0.360603	0.196665	NA	-2.16835	5.4768	148.443	0.526985	0.327108
YOR369C	P48589	RPS12	RP	11	0.129797	-0.543483	0.133259	0.415342	-0.134915	-1.33073	3.68726	42.9393	2.11639	0.703967	-1.01133	-0.897901	-1.81421	-1.51658	4.38095	69.4506	0.693689	0.219827	2.44658	0.364487	-0.274956	-0.993365	-1.22039	-1.18952	4.2764	64.5957	0.58914	0.265572
YLR367W;YJL190C	Q3E7Y3;P0C0W1	RPS22b;RPS22a	RP	11	0.377987	-0.560954	-0.0101527	0.296095	-0.102975	-1.87692	4.23568	62.7981	2.39686	0.81713	-0.417638	-0.652502	-1.61681	-2.26445	5.39197	139.966	1.15629	0.0160382	2.5545	0.765712	0.136838	-0.327082	-0.815778	-1.56431	4.89194	98.9691	0.656256	0.208636
YGR027C;YLR333C	Q3E792;P0C0T4	RPS25a;RPS25b	RP	11	0.315835	-0.0720948	-0.163802	-0.0715267	-0.089847	-1.20675	3.52287	38.3149	2.22915	0.543145	-0.234814	-1.17597	NA	-1.33655	4.23148	62.6154	0.708613	0.205838	3.21629	0.973475	0.34811	0.0121266	NA	-1.1551	4.91413	100.503	1.39126	0.00459127
YLR388W	P41057	RPS29a	RP	11	-0.696113	-0.0115543	0.206321	0.0572087	0.444138	-2.478	4.84647	95.8985	0.356038	-0.594158	-0.575058	-0.651801	NA	-2.29179	3.99226	53.0481	-0.854206	0.00643156	2.21176	1.27162	1.06799	0.704354	NA	-1.90126	5.33057	134.134	0.484095	0.374579
YOR182C;YLR287C-A	P0CX34;P0CX33	RPS30b;RPS30a	RP	11	-0.9004	-0.259277	0.093271	0.337218	0.729188	-2.53323	4.95521	103.406	1.12754	0.00240507	0.406199	-0.563474	NA	-2.54572	4.921	100.983	-0.0342028	0.527789	2.03804	1.06118	1.89211	1.60686	2.35848	-2.09661	6.27289	257.754	1.31768	0.00743922
YOR096W	P26786	RPS7a	RP	11	0.540505	-0.375784	0.0135825	0.0203302	-0.198633	-2.43583	4.79202	92.3468	2.35407	0.994243	-0.805836	-1.05953	-0.998674	-2.15644	5.2703	128.647	0.478278	0.498389	2.35792	0.365363	-0.388391	-0.445735	-0.878921	-1.67686	4.75692	90.1268	-0.0351061	0.821127
YMR116C	P38011	ASC1	RP	12	-0.228055	-0.240724	0.0634914	0.249638	0.155649	-2.26852	4.60422	81.0748	1.37714	0.301758	-0.41769	-0.688517	-1.19581	-2.20121	4.69584	86.3908	0.0916238	0.756456	1.18898	0.069243	-0.281767	-0.58025	-1.2037	-2.01176	4.40536	70.6359	-0.198852	0.563645
YAL035W	P39730	FUN12	TF	12	0.0432327	0.0405443	-0.0653513	0.171771	-0.190197	-1.61882	3.94581	51.367	1.6259	0.0554678	-0.631844	-0.48362	NA	-1.56363	4.0194	54.0553	0.0735937	0.721713	1.32082	-0.299403	-0.86254	-1.15867	NA	-1.44969	3.5569	39.2294	-0.388907	0.324513
YLR075W	P41805	RPL10	RP	12	-0.251308	-0.302338	-0.0984197	0.353028	0.299038	-2.01749	4.36592	68.731	1.42587	0.260609	-0.200616	-0.520701	-2.45022	-2.0955	4.5899	80.2744	0.22398	0.977838	1.76361	0.412064	0.171172	-0.571462	-2.28034	-1.70953	4.46031	73.3779	0.094385	0.95873
YGR085C;YPR102C	Q3E757;P0C0W9	RPL11b;RPL11a	RP	12	-0.453477	-0.283953	0.192568	0.161538	0.383324	-2.83684	5.19221	121.868	0.889756	0.0660234	-0.508106	-0.514338	-0.72946	-2.64421	4.93878	102.235	-0.253426	0.233621	1.23802	0.459569	0.00560365	-0.0473362	-0.828137	-2.32476	4.97294	104.684	-0.219272	0.534435
YEL054C;YDR418W	P0CX54;P0CX53	RPL12a;RPL12b	RP	12	-0.3122	-0.184331	-0.0730082	0.472184	0.0973558	-3.49379	5.84235	191.25	0.809433	0.145475	-0.702758	-0.698745	-1.23543	-3.57217	5.74653	178.96	-0.0958241	0.430282	1.28854	0.383766	-0.0286233	-0.330081	-1.07494	-2.99623	5.58073	159.532	-0.261618	0.476396
YIL133C	P26784	RPL16a	RP	12	-0.166815	-0.313705	0.25109	0.0866908	0.142739	-2.67496	5.01165	107.531	1.40278	0.229664	-0.416554	-0.571809	-1.96749	-2.38873	4.84668	95.9123	-0.164967	0.334425	1.33808	0.506026	0.479062	0.019918	-1.85278	-2.36011	5.08975	113.513	0.0781004	0.986591
YNL069C	P26785	RPL16b	RP	12	-0.168696	-0.468781	0.163949	0.166265	0.307263	-2.03021	4.37847	69.3313	1.49662	0.252614	-0.361893	-0.731935	-1.87779	-2.10292	4.60513	81.1259	0.226657	0.972386	1.52293	0.714576	0.275677	-0.481091	-1.82901	-1.94112	4.69027	86.0578	0.311799	0.604289
YNL301C;YOL120C	P0CX50;P0CX49	RPL18b;RPL18a	RP	12	-0.323275	-0.266143	0.0783274	0.342106	0.168985	-2.1771	4.52149	76.5565	1.09824	0.519988	-0.240254	-0.957176	-2.47825	-2.17448	4.5295	76.9827	0.00800923	0.600547	1.50041	0.688071	-0.179374	-1.01712	-2.45339	-2.06827	4.65326	83.8784	0.131775	0.895006
YBR084C-A;YBL027W	P0CX83;P0CX82	RPL19a;RPL19b	RP	12	-0.0503233	-0.353267	0.102348	0.297026	0.0042153	-2.53056	4.86787	97.3313	1.53565	0.634861	-0.576982	-1.09642	-2.62714	-2.74549	5.26952	128.577	0.401658	0.630227	1.67911	0.527894	-0.169091	-1.20312	-3.29865	-2.18777	4.78934	92.1753	-0.078524	0.749533
YPL220W;YGL135W	P0CX44;P0CX43	RPL1a;RPL1b	RP	12	0.0537138	-0.400403	-0.175576	0.354976	0.167288	-2.26261	4.60826	81.3025	1.80447	0.219984	-0.653325	-1.14778	-1.61052	-2.56162	5.16388	119.498	0.555614	0.381861	1.85951	0.131781	-0.715437	-0.934629	-1.48329	-1.94845	4.58406	79.9498	-0.0242056	0.839364
YMR242C;YOR312C	P0CX24;P0CX23	RPL20a;RPL20b	RP	12	-0.355041	-0.380854	0.132129	0.367564	0.236202	-2.5972	4.9516	103.147	1.22675	0.27979	-0.493562	-0.613446	-1.21378	-2.86362	5.28301	129.785	0.331419	0.762591	1.11869	0.151239	-0.242234	-0.730752	-1.33634	-2.42666	4.78452	91.8675	-0.167078	0.610569
YLR061W	P05749	RPL22a	RP	12	-0.402883	-0.24985	0.127472	0.315193	0.210069	-3.09375	5.44159	144.864	1.04763	0.360212	-0.240366	-0.503081	-0.534149	-2.99596	5.4797	148.742	0.0381098	0.655045	1.36819	0.685295	0.57423	0.308212	0.0424212	-2.41709	5.40739	141.47	-0.0341987	0.822642
YFL034C-A	P56628	RPL22b	RP	12	-0.165604	-0.143264	0.170514	0.207815	-0.0694614	-2.47565	4.80633	93.2669	1.06884	0.111426	-0.5242	-0.387886	NA	-2.59892	4.81231	93.6543	0.00598056	0.596949	1.00141	0.446934	0.516209	0.595992	NA	-1.93394	4.59085	80.3269	-0.215482	0.539798
YER117W;YBL087C	P0CX42;P0CX41	RPL23b;RPL23a	RP	12	-0.580628	-0.161876	0.0643565	0.304751	0.373396	-2.85325	5.21467	123.78	1.19365	0.186114	-0.457828	-0.543565	-1.40492	-2.81383	5.19699	122.273	-0.0176815	0.555724	1.55518	0.458095	0.0976791	-0.0478605	-1.29	-2.2962	5.05297	110.656	-0.161704	0.618675
YGL031C	P04449	RPL24a	RP	12	0.420998	-0.319774	-0.0858605	0.579358	-0.594722	-2.01472	4.40391	70.5648	2.28179	1.06143	-0.784202	-2.11601	NA	-2.46203	5.4183	142.544	1.01439	0.040779	2.0438	0.444556	-0.568778	-1.5287	NA	-1.89836	4.5999	80.8329	0.195994	0.787341
YGR148C	P24000	RPL24b	RP	12	0.559205	-0.423016	0.0468112	0.342052	-0.525052	-2.2056	4.58821	80.1805	2.07435	0.870334	-1.4064	-1.11573	NA	-2.65678	5.43884	144.588	0.850624	0.103597	1.87774	0.441825	-0.898227	-1.71313	NA	-1.67367	4.22823	62.4743	-0.359989	0.355913
YOL127W	P04456	RPL25	RP	12	-0.293852	-0.281991	0.167023	0.320752	0.088068	-3.16718	5.50998	151.896	0.883546	0.167309	-0.45306	-0.763124	-0.921994	-3.34121	5.60885	162.672	0.0988773	0.770578	1.01204	0.298422	0.0258637	-0.117297	-0.652155	-2.81317	5.35491	136.417	-0.155065	0.628752
YHR010W;YDR471W	P0C2H6;P0C2H7	RPL27a;RPL27b	RP	12	-0.285932	-0.217643	0.101215	0.214539	0.187822	-3.78691	6.12383	232.453	1.15606	0.045832	-0.645714	-0.853688	-1.35824	-3.81621	6.09222	227.415	-0.0316104	0.532124	1.23992	0.0752929	-0.333532	-0.596342	-1.39994	-3.25392	5.64607	166.922	-0.477762	0.239643
YGL103W	P02406	RPL28	RP	12	-0.508332	-0.320076	0.145348	0.355242	0.327817	-3.14941	5.5124	152.152	1.40875	0.390708	-0.469818	-0.659552	-1.2527	-3.03437	5.55565	156.782	0.0432464	0.664543	1.62147	0.227994	0.0323057	0.00845521	-1.35668	-2.59532	5.33238	134.303	-0.180025	0.59124
YIL018W;YFR031C-A	P0CX46;P0CX45	RPL2b;RPL2a	RP	12	0.0835985	-0.183849	-0.0681218	0.207898	-0.0395254	-3.00445	5.33267	134.33	1.52631	0.479516	-0.556213	-1.24382	-2.5618	-3.08632	5.55788	157.025	0.225209	0.975334	1.76106	0.239298	-0.308744	-1.2847	-2.73604	-2.53157	5.1015	114.441	-0.231175	0.517768
YGL030W	P14120	RPL30	RP	12	-0.230778	-0.518597	0.353475	0.347991	0.0479087	-2.62056	4.98076	105.254	1.32247	0.489018	-0.554095	-1.00805	-1.68834	-2.53898	4.97007	104.477	-0.0106925	0.567755	1.49792	0.498137	0.103358	-0.448126	-1.5093	-2.02043	4.69744	86.4868	-0.28332	0.448048
YBL092W	P38061	RPL32	RP	12	0.0833457	-0.646727	0.137945	0.826605	-0.401169	-2.08695	4.5009	75.4715	1.8914	0.987854	-1.26327	-1.27676	-1.99286	-2.05608	4.81604	93.8969	0.315145	0.794453	1.99758	0.862327	-0.194932	-1.52189	-1.53274	-1.54327	4.42664	71.6851	-0.0742599	0.756481
YPL143W	P05744	RPL33a	RP	12	-0.000857371	-0.378648	0.129481	0.386023	-0.135999	-2.92969	5.27432	129.005	1.4192	0.57887	-0.959747	-0.92204	-2.24083	-2.96628	5.40497	141.234	0.130656	0.833289	1.39627	0.383816	-0.157271	-0.808579	-2.02182	-2.49938	4.99786	106.509	-0.276455	0.45691
YOR234C	P41056	RPL33b	RP	12	0.232511	-0.297004	0.19191	0.283508	-0.410924	-3.36904	5.71965	175.657	1.73223	0.652258	-0.80204	-1.0016	NA	-3.22449	5.8015	185.911	0.0818516	0.737559	1.59136	0.433844	0.0213346	-0.493726	NA	-2.94724	5.5535	156.549	-0.166148	0.61197
YER056C-A;YIL052C	P87262;P40525	RPL34a;RPL34b	RP	12	-0.287433	-0.114015	-0.0480166	0.412675	0.0367897	-2.88256	5.22387	124.572	1.03919	0.197144	-0.147742	-0.781032	-1.22354	-2.84312	5.19767	122.33	-0.0261989	0.541233	1.65605	0.826826	0.139527	-0.392836	NA	-2.37136	5.13445	117.085	-0.0894231	0.731869
YDL136W;YDL191W	P0CX85;P0CX84	RPL35b;RPL35a	RP	12	-0.142888	-0.372212	0.106375	0.386103	0.0226226	-2.80594	5.15005	118.358	1.14299	0.304235	-0.705583	-1.10157	-1.59471	-2.51293	4.79194	92.3414	-0.358111	0.144743	1.65616	0.417037	0.00140293	-0.647026	-1.69261	-1.94552	4.63166	82.6319	-0.51839	0.20657
YLR325C	P49167	RPL38	RP	12	-0.21808	-0.303801	0.336628	0.148585	0.0366676	-3.02974	5.37083	137.93	1.22181	-0.087644	-0.274681	-0.597502	-0.241681	-3.00566	5.49282	150.101	0.121997	0.816079	2.09908	0.940094	0.828366	0.804101	0.00798745	-2.73746	6.16108	238.533	0.790255	0.122385
YPR043W;YJR094W-A	P0CX26;P0CX25	RPL43a;RPL43b	RP	12	-0.358363	-0.707338	0.107245	0.578307	0.380149	-3.3708	5.76702	181.521	0.978764	0.144456	-0.199317	-0.55846	-0.510609	-3.09633	5.50992	151.891	-0.257101	0.229959	1.0812	0.442882	0.118333	0.123211	-0.373868	-2.43784	5.12074	115.978	-0.646287	0.124177
YML073C	Q02326	RPL6a	RP	12	0.413321	-0.522845	0.148396	0.267985	-0.306857	-2.4322	4.79638	92.626	1.82821	0.617333	-1.18859	-1.6862	-1.56539	-2.76689	5.39271	140.038	0.59633	0.327864	1.65919	0.330347	-0.74125	-1.35285	-1.95668	-2.06962	4.57121	79.241	-0.225171	0.526141
YLR448W	P05739	RPL6b	RP	12	-0.123248	-0.429645	0.131622	0.193928	0.227342	-3.33433	5.6765	170.481	1.21332	0.161662	-0.750081	-1.01784	-1.21056	-3.2744	5.5841	159.905	-0.0923981	0.435413	1.17097	0.212337	-0.338161	-0.514202	-1.48653	-2.85242	5.24701	126.586	-0.429491	0.283582
YGL147C	P05738	RPL9a	RP	12	-0.227261	-0.128495	0.00690304	0.0724623	0.27639	-2.71249	5.04491	110.039	1.23029	0.260771	-0.478417	-0.871414	-1.16946	-2.85125	5.24445	126.362	0.199541	0.972387	1.5569	0.706224	0.371756	-0.192317	-1.86156	-2.37617	5.18724	121.449	0.142327	0.877125
YNL067W	P51401	RPL9b	RP	12	-0.0826308	-0.176324	-0.0111528	0.116806	0.153302	-2.83721	5.16433	119.536	0.937288	0.227613	-0.584132	-0.966901	-1.25309	-2.77216	4.99991	106.66	-0.164426	0.335118	1.10558	0.371863	-0.0319651	-0.507517	-1.22626	-2.66842	5.14216	117.712	-0.022174	0.842773
YLR340W	P05317	RPP0	RP	12	-0.434564	-0.171628	0.139234	0.128331	0.338627	-2.74947	5.09619	114.021	1.26925	0.0339477	-0.479554	-0.612365	-1.04234	-2.76337	5.16692	119.75	0.0707287	0.716243	1.34794	0.180455	-0.0399234	-0.408324	-1.05489	-2.68364	5.24099	126.059	0.144797	0.872948
YDR382W	P02400	RPP2b	RP	12	-0.386333	-0.18039	-0.0635343	0.371405	0.258853	-2.96018	5.30914	132.157	1.76583	0.0969296	-0.70502	-0.975298	-1.28817	-3.01802	5.6034	162.058	0.294256	0.835852	1.94632	0.448644	-0.0234259	0.224961	-0.751313	-2.49103	5.48477	149.266	0.175627	0.821151
YBR048W;YDR025W	P0CX48;P0CX47	RPS11b;RPS11a	RP	12	-0.439525	-0.255299	-0.0418221	0.331102	0.405544	-2.87689	5.23562	125.591	0.633541	0.166757	-0.256891	-0.847246	-1.69316	-2.88688	5.01645	107.89	-0.219164	0.269763	1.07786	0.398755	-0.0376638	-1.02646	-1.99701	-2.19405	4.55721	78.4757	-0.67841	0.108186
YDR064W	P05756	RPS13	RP	12	-0.512635	-0.313582	0.111209	0.328386	0.386621	-2.98789	5.35209	136.15	1.16117	0.24348	-0.631235	-0.664567	-1.63914	-3.14806	5.47511	148.27	0.123026	0.81812	1.20053	0.243576	-0.024259	-0.358982	-1.65234	-2.75648	5.23243	125.313	-0.119661	0.683626
YOL040C	Q01855	RPS15	RP	12	-0.442151	-0.152482	0.0376312	0.264071	0.292931	-2.29914	4.64628	83.4735	1.68579	0.439731	-0.617277	-0.775509	-1.19119	-2.8074	5.45068	145.78	0.804404	0.131131	2.04134	0.567673	0.0469418	-0.466135	-1.03998	-2.21835	5.18952	121.641	0.543242	0.310183
YMR143W;YDL083C	P0CX52;P0CX51	RPS16a;RPS16b	RP	12	-0.423623	-0.192297	0.202733	0.21591	0.197278	-2.47556	4.82028	94.1732	1.03996	0.143278	-0.615503	-0.702573	-1.07942	-2.69366	4.98673	105.69	0.16645	0.905196	1.4329	0.298838	0.0607045	-0.20273	-0.681873	-2.57963	5.27235	128.829	0.45207	0.412664
YDR447C;YML024W	P14127;P02407	RPS17b;RPS17a	RP	12	-0.189766	-0.500132	0.181793	0.316917	0.191189	-3.0976	5.44964	145.674	1.05286	0.0560986	-0.680932	-0.667411	-1.45342	-3.14108	5.38379	139.175	-0.0658486	0.476354	1.13832	0.153414	-0.213032	-0.55839	-1.55321	-2.48924	4.86664	97.2486	-0.582995	0.161013
YML026C;YDR450W	P0CX56;P0CX55	RPS18b;RPS18a	RP	12	-0.233154	-0.557504	0.274419	0.347287	0.168953	-2.12273	4.48342	74.5629	1.3227	0.367845	-0.607277	-0.627106	-1.2269	-2.22433	4.68976	86.0272	0.206336	0.986223	1.34064	0.39603	-0.232671	-0.219445	-0.974404	-1.9209	4.52198	76.5825	0.0385581	0.945756
YLR441C	P33442	RPS1a	RP	12	-0.363048	-0.14141	-0.0149927	0.247669	0.271782	-3.09792	5.43945	144.649	1.08086	0.224979	-0.497593	-0.50032	-1.25101	-3.26821	5.6242	164.411	0.184746	0.942292	1.21727	0.280604	-0.0965109	-0.165855	-1.5672	-2.87033	5.38228	139.029	-0.0571693	0.784519
YML063W	P23248	RPS1b	RP	12	-0.465597	-0.28585	0.166692	0.125801	0.458954	-3.13061	5.49029	149.837	1.07843	0.253415	-0.463669	-0.447612	-1.14886	-3.38185	5.764	181.141	0.273713	0.877016	0.888671	0.211101	0.0214443	-0.045637	-1.67615	-2.90825	5.31582	132.77	-0.174465	0.599506
YGL123W	P25443	RPS2	RP	12	0.0771668	-0.193147	-0.10506	0.388387	-0.167347	-2.3842	4.723	88.0325	2.08181	0.724977	-0.35181	-1.2247	-2.69439	-2.35154	5.20996	123.377	0.486966	0.484423	2.00425	0.681034	-0.0882457	-1.28322	-3.18024	-1.70166	4.52479	76.732	-0.198208	0.564578
YHL015W	P38701	RPS20	RP	12	-0.405943	-0.148728	0.0187443	0.3064	0.229527	-2.69246	5.03699	109.437	1.10009	0.215322	-0.430384	-0.653752	-1.52164	-2.88935	5.22009	124.246	0.183104	0.938956	1.30437	0.460742	0.139083	-0.398529	-1.18136	-2.64914	5.26897	128.528	0.231988	0.728595
YKR057W	P0C0V8	RPS21a	RP	12	-0.621482	-0.33902	0.194336	0.470401	0.295765	-3.32243	5.70034	173.321	1.26675	0.233641	-0.450706	0.0662935	NA	NA	NA	NA	NA	NA	1.61437	0.210334	0.450594	-1.22131	NA	-3.02929	5.61767	163.669	-0.0826629	0.742809
YJL136C	Q3E754	RPS21b	RP	12	-0.215433	-0.348947	-0.14323	0.585131	0.122478	-2.84861	5.21058	123.429	2.01056	0.627254	-0.602967	-0.574996	NA	-2.94735	5.73472	177.501	0.524138	0.427131	2.20193	0.419716	0.20284	-1.00003	NA	-2.46744	5.39145	139.916	0.180875	0.812406
YPR132W;YGR118W	P0CX30;P0CX29	RPS23b;RPS23a	RP	12	0.137254	-0.299739	-0.144114	0.399252	-0.0926526	-2.36828	4.71133	87.3236	1.81135	0.754253	-0.644729	-1.13277	-2.48994	-2.27029	4.96408	104.044	0.252748	0.91937	2.43683	0.972682	0.0594978	-1.39799	-1.95089	-1.7532	4.93227	101.775	0.220933	0.746486
YER074W;YIL069C	P0CX32;P0CX31	RPS24a;RPS24b	RP	12	-0.486208	-0.294203	0.370834	0.187441	0.222137	-2.98041	5.33873	134.896	1.51127	0.386592	-0.500906	-0.619872	-1.07109	-2.95943	5.54229	155.336	0.203554	0.980558	1.47952	0.428542	-0.0068311	-0.14045	-1.16688	-2.47196	5.16848	119.88	-0.170257	0.605798
YGL189C;YER131W	P39938;P39939	RPS26a;RPS26b	RP	12	-0.734196	-0.207158	0.117237	0.383128	0.440989	-2.99541	5.37773	138.592	1.10449	0.189151	-0.372309	-0.480385	-1.08657	-3.1332	5.52567	153.557	0.147935	0.867865	1.47758	0.707299	0.445993	0.39297	-0.916586	-2.59758	5.52787	153.792	0.150143	0.863921
YHR021C;YKL156W	P38711;P35997	RPS27b;RPS27a	RP	12	-0.3638	-0.200104	-0.0228471	0.330053	0.256698	-3.09148	5.43736	144.44	1.61144	0.0988514	-0.367626	-1.14505	-1.63419	-2.9066	5.41144	141.868	-0.0259191	0.541706	1.96923	1.07171	0.518196	-0.575066	-1.00751	-2.34054	5.44794	145.504	0.010588	0.898108
YNL178W	P05750	RPS3	RP	12	-0.386682	-0.22286	0.0460806	0.214708	0.348754	-2.44494	4.79207	92.3499	1.14184	0.0896822	-0.464008	-0.624366	-1.15636	-2.65981	5.00835	107.285	0.216272	0.993536	1.23079	0.264268	-0.110802	-0.376371	-1.31056	-2.1472	4.64483	83.3898	-0.14724	0.640717
YHR203C;YJR145C	P0CX36;P0CX35	RPS4b;RPS4a	RP	12	0.168019	-0.471468	0.0542548	0.374745	-0.12555	-2.36711	4.71657	87.6409	2.02517	0.623158	-0.710642	-0.965761	-2.04876	-2.28229	5.08457	113.106	0.368001	0.69249	1.9052	0.48867	-0.243754	-1.00025	-1.77461	-1.83384	4.59629	80.6305	-0.120279	0.682652
YJR123W	P26783	RPS5	RP	12	-0.49759	-0.239751	0.0428639	0.262921	0.431556	-2.09611	4.45618	73.168	1.03917	0.145962	-0.302763	-0.490985	-1.38068	-2.15958	4.50094	75.4739	0.0447636	0.667358	1.45322	0.437738	0.11018	-0.245149	-1.69789	-1.99571	4.65655	84.0696	0.200371	0.780125
YPL090C;YBR181C	P0CX38;P0CX37	RPS6a;RPS6b	RP	12	-0.194413	-0.267084	0.0157799	0.289478	0.156239	-2.99618	5.33318	134.377	1.40647	0.228699	-0.615483	-0.962326	-2.64265	-3.0789	5.44312	145.017	0.109938	0.792259	1.26477	0.0707208	-0.367614	-0.839395	-2.39449	-2.55974	4.87509	97.8198	-0.458088	0.256935
YNL096C	P48164	RPS7b	RP	12	-0.459945	-0.417618	0.326943	0.278103	0.272518	-3.04046	5.40518	141.254	1.36016	0.208256	-0.436491	-0.327129	-0.871821	-3.05492	5.5922	160.804	0.187017	0.946907	1.30676	0.161247	0.0843147	0.264295	-0.644747	-2.59591	5.29478	130.848	-0.110394	0.698285
YER102W;YBL072C	P0CX40;P0CX39	RPS8b;RPS8a	RP	12	-0.0270902	-0.411819	0.00304485	0.369644	0.0662211	-2.34226	4.68544	85.7702	1.52373	0.472952	-0.630097	-1.03263	-1.53735	-2.27608	4.79782	92.7185	0.112381	0.797069	1.56903	0.214792	-0.440273	-0.802449	-1.55312	-1.68924	4.22	62.1191	-0.465441	0.250374
YHR064C	P38788	SSZ1	RBP	12	0.594299	0.553595	0.482223	-0.0501575	-1.57996	-2.18373	4.68827	85.9387	1.50661	0.0157768	-1.0748	-1.93346	-2.39329	-2.16443	4.42123	71.417	-0.267041	0.220258	1.49218	-0.120274	-1.06149	-1.95768	-2.61443	-2.0191	4.23105	62.5968	-0.457219	0.257718
YLR150W	P39015	STM1	RBP	12	0.160105	-0.271074	-0.20256	0.179029	0.134499	-3.54095	5.87578	195.733	1.78667	0.334844	-1.50721	-2.36361	-2.35832	-3.62855	6.07547	224.791	0.199696	0.972703	2.56864	0.399996	-0.811563	-1.27448	-1.61029	-3.38526	6.48332	298.232	0.607546	0.248988
YGR285C	P32527	ZUO1	RBP	12	0.833145	0.576964	0.540093	0.00643442	-1.95664	-2.68085	5.26327	128.021	2.06744	0.21611	-0.987188	-2.25467	-2.20953	-2.61339	5.2649	128.165	0.00162155	0.589251	2.11299	0.0694715	-1.02805	-2.46948	-2.54749	-2.30774	4.944	102.606	-0.319274	0.403257
YER036C	P40024	ARB1	RBP	13	0.554949	-0.0270046	-0.295302	-0.186426	-0.0462157	-0.586808	2.9409	25.5964	0.991393	-0.410942	-0.451727	-0.408837	NA	-0.625222	2.70405	21.7209	-0.236853	0.250651	1.10996	-0.152008	-0.218608	-0.1896	NA	-0.385273	2.6467	20.8744	-0.294205	0.434197
YDR101C	Q03862	ARX1	RBP	13	1.9833	0.282428	-0.508647	-0.859984	-0.897095	-0.606296	3.40559	35.3235	1.51936	0.0770846	-0.187302	-0.479237	NA	-1.01386	3.47778	37.136	0.0721892	0.719029	1.06531	-0.0339787	-0.673124	-0.829307	NA	-0.77865	2.86926	24.3564	-0.536328	0.193073
YNL112W	P24783	DBP2	RBP	13	1.96488	0.564621	-0.233184	-0.743188	-1.55313	-0.74907	3.5914	40.1788	3.39887	1.51215	0.147911	-0.756439	NA	-1.23206	5.14854	118.234	1.55714	0.000600318	3.05236	0.825145	-0.58479	-1.75354	NA	-0.521747	3.9852	52.7889	0.393801	0.487563
YHR170W	P38861	NMD3	RBP	13	1.85532	0.185854	-0.491331	-0.884003	-0.665843	-0.425735	3.15678	29.7279	1.10437	0.371715	-0.392104	-0.438922	NA	-0.578562	2.88414	24.6088	-0.272643	0.214922	0.374197	-0.114473	-0.768	-0.455931	NA	-0.145847	1.96801	13.0409	-1.18877	0.00690361
YLL045C	P29453	RPL8b	RP	13	1.48036	-1.2498	0.0123076	-0.0588711	-0.245328	-1.25824	3.8487	48.0234	4.01118	1.50074	-0.817631	-0.877163	NA	-1.24096	5.56765	158.091	1.71894	0.000120767	4.12849	1.17098	-0.51323	-0.654613	NA	-0.850162	5.24782	126.658	1.39912	0.00435469
YOR293W;YMR230W	Q08745;P46784	RPS10a;RPS10b	RP	13	0.946305	-0.797236	0.0428119	0.776074	-0.967955	-1.15805	3.68317	42.8176	2.99539	1.27047	-0.607998	-1.45146	-1.39859	-1.20928	4.76851	90.8541	1.08535	0.0259518	3.38635	1.34227	0.265686	-0.959309	-0.907323	-0.632065	4.56203	78.7384	0.878865	0.0827468
YBR221C	P32473	PDB1	RBP	14	3.19906	0.856293	-0.392464	-1.60644	-2.05645	-1.77272	5.39619	140.376	1.35441	0.893168	-0.814908	-2.14302	-1.80138	-2.03949	4.49785	75.3124	-0.898337	0.00454543	0.161525	-1.08395	-2.87411	-3.76946	NA	-2.68235	3.53029	38.5125	-1.8659	3.26245e-05

## Sheet: Sheet 4 - Top hits
						Polysome association profiles: log2(normalised LFQ intensity)
						Unstressed		H2O2				3-AT
Identifier	Uniprot	Name	Function	Cluster	Rank	FS/T	%P	FS/T	%P	ΔFS/T	ΔFS/T p-value	FS/T	%P	ΔFS/T	ΔFS/T p-value
YOR198C	P38934	BFR1	RBP	4	1	5.66321	168.918	7.25037	507.525	1.58716	0.000451316	6.99981	426.612	1.3366	0.00658545
YBR221C	P32473	PDB1	RBP	14	2	5.39619	140.376	4.49785	75.3124	-0.898337	0.00454543	3.53029	38.5125	-1.8659	3.26245e-05
YPL226W	Q08972	NEW1	RBP	9	3	4.3227	66.7021	3.43699	36.1007	-0.885707	0.00502614	3.34715	33.9211	-0.975549	0.0248353
YBR106W	P38264	PHO88	NA	4	4	3.60163	40.4648	4.64765	83.5528	1.04602	0.0334596	4.9049	99.8618	1.30327	0.00815508
YFL038C	P01123	YPT1	RBP	9	5	3.41233	35.4888	2.69666	21.61	-0.715666	0.0177293	2.43824	18.0661	-0.974084	0.0250382
YGL195W	P33892	GCN1	RBP	9	6	2.79167	23.081	2.09165	14.2078	-0.700023	0.0197383	1.75867	11.2795	-1.033	0.017922
YPL225W	Q08971	YPL225W	RBP	3	7	1.79794	11.5908	0.417423	4.4518	-1.38052	4.72857e-05	0.747072	5.59461	-1.05087	0.0161474
YOR122C	P07274	PFY1	NA	3	8	1.65807	10.5198	0.569006	4.945	-1.08907	0.000885606	0.813073	5.8565	-0.845	0.0495481
YDR502C	P19358	SAM2	RBP	3	9	1.03249	6.81852	0.0128138	3.36307	-1.01968	0.0016473	-0.179113	2.94415	-1.21161	0.0059513
YJL052W	P00360	TDH1	RBP	3	10	0.735531	5.55003	-0.492932	2.3686	-1.22846	0.000232831	-0.493426	2.36779	-1.22896	0.00530867
YOR298C-A	O14467	MBF1	RBP	5	11	7.32641	534.991	6.68258	342.402	-0.643827	0.0286834	7.07425	449.2	-0.252156	0.489057
YML056C	P50094	IMD4	RBP	6	12	4.81292	93.6943	5.46074	146.799	0.647812	0.267059	3.81558	46.9336	-0.997341	0.0219799
YJL080C	P06105	SCP160	RBP	4	13	4.58659	80.0903	5.79385	184.927	1.20726	0.0111431	5.08119	112.842	0.494603	0.362572
YHR121W	P38828	LSM12	RBP	6	14	4.49292	75.0555	4.01403	53.8545	-0.478893	0.077275	3.43174	35.9697	-1.06118	0.0151955
YBR263W	P37292	SHM1	NA	7	15	4.203	61.3912	3.89292	49.5182	-0.310073	0.181645	3.20618	30.7634	-0.996818	0.022045
YDL229W	P11484	SSB1	RBP	9	16	3.88688	49.3111	3.13046	29.1905	-0.756416	0.0133139	3.18813	30.381	-0.698745	0.0989365
YNL112W	P24783	DBP2	RBP	13	17	3.5914	40.1788	5.14854	118.234	1.55714	0.000600318	3.9852	52.7889	0.393801	0.487563
YGL008C;YPL036W	P05030;P19657	PMA1;PMA2	RBP	9	18	3.54834	38.9973	3.27141	32.1862	-0.276929	0.210902	2.37145	17.2487	-1.17689	0.00745158
YHR216W;YAR073W	P38697;P39567	IMD2;IMD1	RBP	6	19	3.538	38.7188	4.91671	100.683	1.37871	0.00292116	2.99543	26.5824	-0.542565	0.188535
YNL007C	P25294	SIS1	RBP	9	20	3.48004	37.1942	2.86938	24.3583	-0.61066	0.035454	3.03495	27.3205	-0.44509	0.268823
YMR229C	Q05022	RRP5	RBP	10	21	3.37808	34.6563	4.69571	86.3832	1.31763	0.0048027	3.98007	52.6017	0.601993	0.253913
YHR170W	P38861	NMD3	RBP	13	22	3.15678	29.7279	2.88414	24.6088	-0.272643	0.214922	1.96801	13.0409	-1.18877	0.00690361
YBR025C	P38219	OLA1	RBP	9	23	3.11514	28.8821	3.36787	34.412	0.252734	0.919398	5.03918	109.603	1.92404	6.96309e-05
YNL135C	P20081	FPR1	RBP	9	24	2.89744	24.8367	2.32779	16.7346	-0.569643	0.0456719	2.89368	24.7721	-0.00375788	0.873801
YNL132W	P53914	KRE33	RBP	10	25	2.66708	21.1713	3.70157	43.3672	1.03449	0.0359855	3.3276	33.4647	0.660527	0.205338
YJR104C	P00445	SOD1	RBP	9	26	2.66218	21.0996	1.74326	11.1597	-0.918925	0.00385043	2.42801	17.9383	-0.234174	0.513611
YDR321W	P38986	ASP1	NA	8	27	2.60791	20.3206	3.63843	41.5101	1.03052	0.0368934	3.27125	32.1828	0.663343	0.203184
YPR103W	P30656	PRE2	RBP	3	28	2.35992	17.1114	1.77779	11.43	-0.582128	0.0423271	1.64615	10.4332	-0.71377	0.0925164
YGR209C	P22803	TRX2	RBP	8	29	2.34322	16.9145	1.71186	10.9195	-0.631356	0.0310859	2.26545	16.0269	-0.0777641	0.75077
YGL011C	P21243	SCL1	RBP	3	30	2.30774	16.5036	2.22455	15.5788	-0.0831924	0.449374	1.4488	9.09938	-0.858939	0.0461791
YDL007W	P40327	RPT2	RBP	8	31	2.05011	13.8046	1.40481	8.82611	-0.6453	0.0284103	1.56619	9.87075	-0.483919	0.234405
YDL022W	Q00055	GPD1	RBP	8	32	2.04416	13.7477	1.47367	9.25759	-0.570484	0.0454397	1.57647	9.94134	-0.467681	0.248398
YPL273W;YMR321C	Q08985;Q04898	SAM4;YMR321C	RBP	3	33	2.00539	13.3832	0.990799	6.62429	-1.01459	0.00172205	1.51525	9.52831	-0.490134	0.229199
YKL056C	P35691	TMA19	RBP	3	34	1.92272	12.6379	1.10135	7.15183	-0.821373	0.00826366	1.6009	10.1111	-0.321818	0.400191
YLL050C	Q03048	COF1	RBP	3	35	1.78257	11.4679	0.847746	5.99896	-0.934821	0.00338149	1.12114	7.25064	-0.661424	0.116426
YGL148W	P28777	ARO2	RBP	8	36	1.71472	10.9411	1.07076	7.00179	-0.643958	0.0286589	1.34336	8.45804	-0.371359	0.343345
YDR226W	P07170	ADK1	RBP	3	37	1.66037	10.5366	0.802807	5.81497	-0.857564	0.00626649	1.59129	10.0439	-0.0690815	0.764944
YGR254W	P00924	ENO1	RBP	3	38	1.63973	10.3869	0.991083	6.62559	-0.64865	0.0277979	1.29472	8.17766	-0.345011	0.372906
YLR179C	Q06252	YLR179C	RBP	3	39	1.61818	10.2329	0.378878	4.33443	-1.2393	0.000208805	1.2633	8.00146	-0.354884	0.36165
YHR163W	P38858	SOL3	NA	3	40	1.57119	9.90497	0.994464	6.64114	-0.576722	0.043749	1.07947	7.04421	-0.491714	0.227889
YMR108W	P07342	ILV2	RBP	3	41	1.56332	9.85111	1.17378	7.52004	-0.389545	0.1239	0.390109	4.36831	-1.17321	0.00762883
YGR234W	P39676	YHB1	RBP	3	42	1.51594	9.53282	0.274576	4.03213	-1.24136	0.000204513	0.80661	5.83032	-0.709328	0.0943788
YGL137W	P41811	SEC27	RBP	3	43	1.49869	9.41951	1.09832	7.13686	-0.400363	0.117296	0.596487	5.0401	-0.902199	0.0369267
YER023W	P32263	PRO3	RBP	3	44	1.43959	9.04147	0.677953	5.33289	-0.761638	0.0128249	0.988823	6.61522	-0.450769	0.263584
YDL124W	Q07551	YDL124W	RBP	3	45	1.40221	8.8102	0.606151	5.07398	-0.796058	0.0099814	0.864668	6.06974	-0.537541	0.192184
YDR050C	P00942	TPI1	RBP	3	46	1.27869	8.0873	0.627729	5.15044	-0.650964	0.0273817	1.0229	6.77332	-0.255795	0.484167
YOR027W	P15705	STI1	RBP	3	47	1.27173	8.04838	0.992977	6.63429	-0.278756	0.209206	0.116134	3.61276	-1.1556	0.00853147
YHR208W	P38891	BAT1	RBP	3	48	1.22243	7.778	0.261925	3.99692	-0.96051	0.00273249	0.454262	4.56694	-0.768172	0.0720189
YDR454C	P15454	GUK1	RBP	3	49	1.21896	7.75929	0.505083	4.73068	-0.713876	0.0179497	1.26856	8.03069	0.0495992	0.964628
YLR354C;YGR043C	P15019;P53228	TAL1;NQM1	RBP	3	50	1.21705	7.74905	0.531524	4.81818	-0.685529	0.0217743	0.892266	6.18696	-0.324788	0.396633
YAR015W	P27616	ADE1	NA	3	51	1.20364	7.67734	0.0468277	3.4433	-1.15681	0.000469617	0.844878	5.98704	-0.358763	0.357286
YER003C	P29952	PMI40	RBP	3	52	1.20263	7.67194	0.613879	5.10123	-0.588746	0.0406398	0.926962	6.33756	-0.275664	0.457937
YML106W;YMR271C	P13298;P30402	URA5;URA10	RBP	3	53	1.16604	7.47984	0.167161	3.74282	-0.99888	0.00197281	0.359395	4.27629	-0.806646	0.0598972
YIL075C	P32565	RPN2	RBP	3	54	1.14717	7.38263	0.808692	5.83874	-0.338478	0.159064	-0.0702189	3.17498	-1.21739	0.00572974
YIL053W	P41277	GPP1	RBP	3	55	1.14446	7.36878	0.35844	4.27346	-0.78602	0.0107462	0.862819	6.06196	-0.281641	0.450206
YBR011C	P00817	IPP1	RBP	3	56	1.11771	7.23341	0.280372	4.04836	-0.837338	0.00732131	0.997389	6.65461	-0.120321	0.682586
YLR355C	P06168	ILV5	RBP	3	57	1.10301	7.16007	0.486254	4.66934	-0.616755	0.0341163	0.614453	5.10326	-0.488555	0.230513
YMR235C	P11745	RNA1	RBP	3	58	1.07321	7.01372	0.256581	3.98215	-0.816634	0.00856356	1.05787	6.93954	-0.0153395	0.854262
YMR099C	Q03161	YMR099C	RBP	3	59	1.06854	6.99104	0.253745	3.97433	-0.814797	0.00868239	0.611344	5.09227	-0.457198	0.257737
YPR069C	Q12074	SPE3	RBP	3	60	1.04348	6.87065	0.174327	3.76146	-0.869155	0.00572561	0.492362	4.68915	-0.55112	0.18244
YBR249C	P32449	ARO4	RBP	3	61	0.997889	6.65692	-0.319135	2.67183	-1.31702	9.36245e-05	0.512038	4.75354	-0.485852	0.232777
YJL167W	P08524	ERG20	RBP	3	62	0.968826	6.52416	0.366973	4.29881	-0.601854	0.0374659	0.512319	4.75447	-0.456507	0.258361
YDR158W	P13663	HOM2	RBP	3	63	0.955463	6.46401	0.874778	6.11242	-0.0806848	0.45322	0.0528063	3.4576	-0.902657	0.036838
YNL220W	P80210	ADE12	RBP	3	64	0.92559	6.33154	0.223988	3.89319	-0.701602	0.0195268	0.389814	4.36741	-0.535777	0.193478
YOR323C	P54885	PRO2	RBP	3	65	0.877703	6.12482	-0.126295	3.05394	-1.004	0.00188765	0.164576	3.73612	-0.713127	0.0927841
YHR025W	P17423	THR1	RBP	3	66	0.821543	5.89098	-0.122494	3.06199	-0.944037	0.00313404	0.318107	4.15565	-0.503435	0.218336
YGR155W	P32582	CYS4	RBP	3	67	0.787839	5.75495	0.256359	3.98153	-0.53148	0.0573046	-0.0728073	3.16929	-0.860646	0.0457801
YLR301W	Q05905	HRI1	RBP	3	68	0.743865	5.58219	-0.282547	2.74046	-1.02641	0.00155303	0.342132	4.22543	-0.401733	0.31118
YNR043W	P32377	MVD1	RBP	3	69	0.73291	5.53996	-0.0830429	3.14688	-0.815952	0.00860745	0.00281801	3.33985	-0.730092	0.0859262
YGL206C	P22137	CHC1	RBP	2	70	0.713095	5.46439	0.881959	6.14292	0.168864	0.910082	-0.147887	3.00857	-0.860981	0.0457022
YGL234W	P07244	ADE5,7	RBP	3	71	0.655881	5.25193	0.322078	4.1671	-0.333803	0.162627	-0.346702	2.62127	-1.00258	0.0213374
YGR094W	P07806	VAS1	RBP	3	72	0.59471	5.0339	-0.0424067	3.23678	-0.637117	0.0299554	0.105931	3.58729	-0.488779	0.230326
YEL071W	P39976	DLD3	RBP	3	73	0.586215	5.00434	-0.0740681	3.16652	-0.660284	0.0257589	0.00851496	3.35307	-0.577701	0.164434
YFR053C	P04806	HXK1	RBP	3	74	0.582132	4.9902	-0.302186	2.70341	-0.884318	0.00508173	0.109937	3.59727	-0.472196	0.24445

## Sheet: Sheet 5 - Enriched GO terms
Ontology	ID	Description	Count	Gene ratio	Background ratio	p-value	-log10(adjusted p-value)	Gene names
MF	GO:0008144	drug binding	96	0.388664	0.224932	1.46672e-13	10.649	HIS1 / CDC19 / PGK1 / HIS4 / ATP2 / MES1 / CPA2 / THS1 / DPS1 / HXK1 / HXK2 / PMA1 / ADK1 / ADE5,7 / ADE3 / ATP1 / URA2 / HTS1 / SES1 / VAS1 / ARO1 / ILS1 / MIS1 / SSC1 / SSA1 / SSA2 / SAM1 / SSB1 / GLN4 / CPR1 / HSC82 / KRS1 / GUK1 / FRS1 / FRS2 / THR4 / VMA2 / KAR2 / PFK1 / PFK2 / VMA1 / THR1 / SAM2 / HSP60 / FPR1 / DBP5 / ADE2 / RNR1 / UBA1 / AAT2 / DBP2 / YDJ1 / CDC48 / CDC60 / ADE1 / URA7 / …
	GO:0005524	ATP binding	87	0.352227	0.197832	3.29737e-13	10.5982	HIS1 / CDC19 / PGK1 / HIS4 / ATP2 / MES1 / CPA2 / THS1 / DPS1 / HXK1 / HXK2 / PMA1 / ADK1 / ADE5,7 / ADE3 / ATP1 / URA2 / HTS1 / SES1 / VAS1 / ARO1 / ILS1 / MIS1 / SSC1 / SSA1 / SSA2 / SAM1 / SSB1 / GLN4 / HSC82 / KRS1 / GUK1 / FRS1 / FRS2 / VMA2 / KAR2 / PFK1 / PFK2 / VMA1 / THR1 / SAM2 / HSP60 / DBP5 / ADE2 / RNR1 / UBA1 / DBP2 / YDJ1 / CDC48 / CDC60 / ADE1 / URA7 / VMA5 / HSP104 / GLN1 / MVD1 …
	GO:0035639	purine ribonucleoside triphosphate binding	94	0.380567	0.239837	4.14942e-10	7.93901	HIS1 / CDC19 / PGK1 / HIS4 / ATP2 / MES1 / YPT1 / TUB2 / CPA2 / THS1 / DPS1 / HXK1 / HXK2 / PMA1 / ADK1 / ADE5,7 / ADE3 / ATP1 / URA2 / HTS1 / SES1 / VAS1 / ARO1 / ILS1 / MIS1 / SSC1 / SSA1 / SSA2 / SAM1 / SSB1 / GLN4 / HSC82 / KRS1 / GUK1 / FRS1 / FRS2 / VMA2 / KAR2 / PFK1 / PFK2 / VMA1 / THR1 / FUR1 / SAM2 / HSP60 / DBP5 / ADE2 / RNR1 / VPS1 / UBA1 / DBP2 / YDJ1 / CDC48 / CDC60 / ADE1 / URA7 / …
	GO:0036094	small molecule binding	117	0.473684	0.322493	6.01367e-10	7.93901	TDH2 / TDH1 / HIS1 / CDC19 / PGK1 / HIS4 / ATP2 / MES1 / YPT1 / TUB2 / CPA2 / THS1 / DPS1 / HXK1 / HXK2 / PMA1 / PDC1 / ADK1 / ADE5,7 / ADE3 / ATP1 / URA2 / HTS1 / SES1 / ILV2 / VAS1 / ARO1 / ILS1 / MIS1 / SSC1 / SSA1 / SSA2 / SAM1 / ZWF1 / SSB1 / GLN4 / HOM2 / HSC82 / KRS1 / GUK1 / FRS1 / FRS2 / THR4 / VMA2 / KAR2 / PFK1 / PFK2 / VMA1 / THR1 / FUR1 / SAM2 / HSP60 / DBP5 / ADE2 / RNR1 / VPS1 / RP…
	GO:0043168	anion binding	110	0.445344	0.299458	1.1744e-09	7.78688	HIS1 / CDC19 / PGK1 / HIS4 / ATP2 / MES1 / YPT1 / TUB2 / CPA2 / THS1 / DPS1 / HXK1 / HXK2 / PMA1 / PDC1 / ADK1 / ADE5,7 / ADE3 / ATP1 / URA2 / HTS1 / PFY1 / SES1 / ILV2 / VAS1 / ARO1 / ILS1 / MIS1 / SSC1 / SSA1 / SSA2 / SAM1 / SSB1 / GLN4 / HSC82 / KRS1 / GUK1 / FRS1 / FRS2 / THR4 / VMA2 / KAR2 / PFK1 / PFK2 / VMA1 / THR1 / FUR1 / SAM2 / HSP60 / DBP5 / ADE2 / RNR1 / VPS1 / UBA1 / AAT2 / DBP2 / YD…
	GO:0097367	carbohydrate derivative binding	98	0.396761	0.257453	1.37508e-09	7.76688	HIS1 / CDC19 / PGK1 / HIS4 / ATP2 / MES1 / YPT1 / TUB2 / CPA2 / THS1 / DPS1 / HXK1 / HXK2 / PMA1 / ADK1 / ADE5,7 / ADE3 / ATP1 / URA2 / HTS1 / SES1 / VAS1 / ARO1 / ILS1 / MIS1 / SSC1 / SSA1 / SSA2 / SAM1 / SSB1 / GLN4 / GFA1 / HSC82 / KRS1 / GUK1 / FRS1 / FRS2 / VMA2 / KAR2 / PFK1 / PFK2 / VMA1 / THR1 / FUR1 / SAM2 / HSP60 / DBP5 / ADE2 / RNR1 / VPS1 / RPA135 / UBA1 / DBP2 / YDJ1 / CDC48 / CDC60 …
	GO:0004812	aminoacyl-tRNA ligase activity	17	0.0688259	0.0243902	7.15264e-08	6.13693	MES1 / THS1 / DPS1 / HTS1 / SES1 / VAS1 / ILS1 / GLN4 / KRS1 / FRS1 / FRS2 / CDC60 / TYS1 / GRS1 / DED81 / ALA1 / GUS1
	GO:0016875	ligase activity, forming carbon-oxygen bonds	17	0.0688259	0.0243902	7.15264e-08	6.13693	MES1 / THS1 / DPS1 / HTS1 / SES1 / VAS1 / ILS1 / GLN4 / KRS1 / FRS1 / FRS2 / CDC60 / TYS1 / GRS1 / DED81 / ALA1 / GUS1
	GO:0051082	unfolded protein binding	23	0.0931174	0.0447154	1.47901e-05	3.94637	SSC1 / SSA1 / SSA2 / SSB1 / HSC82 / KAR2 / PDI1 / HSP60 / SIS1 / YDJ1 / HSP104 / ZUO1 / TSA1 / SSZ1 / EGD2 / CCT2 / CCT3 / CCT4 / CCT6 / SSB2 / CCT7 / CCT8 / EGD1
	GO:0140101	catalytic activity, acting on a tRNA	17	0.0688259	0.0325203	0.000160274	2.93267	MES1 / THS1 / DPS1 / HTS1 / SES1 / VAS1 / ILS1 / GLN4 / KRS1 / FRS1 / FRS2 / CDC60 / TYS1 / GRS1 / DED81 / ALA1 / GUS1
BP	GO:0044281	small molecule metabolic process	133	0.538462	0.358593	6.89267e-13	9.31097	ADH1 / TDH2 / TDH1 / HIS1 / CDC19 / PGK1 / HIS4 / ATP2 / ENO1 / ENO2 / TRP5 / TPI1 / GPM1 / MES1 / CPA2 / THS1 / DPS1 / HXK1 / HXK2 / PMA1 / MET6 / ILV5 / PDC1 / FAS1 / ADK1 / ADE5,7 / ADE3 / ATP1 / URA2 / GDH1 / HTS1 / LEU1 / SEC53 / SES1 / ILV2 / VAS1 / ERG20 / ARO1 / ILS1 / MIS1 / RNR2 / SAM1 / ZWF1 / PGI1 / GLN4 / URA5 / HOM2 / FBA1 / GFA1 / TAL1 / KRS1 / GUK1 / FRS1 / FRS2 / THR4 / VMA2 / PF…
	GO:1901566	organonitrogen compound biosynthetic process	124	0.502024	0.338295	3.57235e-11	7.89743	TDH2 / TDH1 / HIS1 / CDC19 / PGK1 / HIS4 / ATP2 / ENO1 / ENO2 / TRP5 / TPI1 / GPM1 / MES1 / CPA2 / THS1 / DPS1 / HXK1 / HXK2 / PMA1 / MET6 / ILV5 / ADK1 / ADE5,7 / ADE3 / ATP1 / URA2 / GDH1 / HTS1 / LEU1 / SEC53 / SES1 / ILV2 / VAS1 / ARO1 / ILS1 / MIS1 / SBP1 / SSA1 / SSB1 / PGI1 / GLN4 / URA5 / HOM2 / FBA1 / GFA1 / KRS1 / GUK1 / FRS1 / FRS2 / THR4 / PFK1 / PFK2 / THR1 / FUR1 / FPR1 / DBP5 / ADE…
	GO:0044249	cellular biosynthetic process	162	0.65587	0.495264	4.00196e-10	7.0242	MBF1 / ADH1 / TDH2 / TDH1 / SOD1 / HIS1 / CDC19 / PGK1 / HIS4 / ATP2 / ENO1 / ENO2 / TRP5 / TPI1 / GPM1 / MES1 / CPA2 / THS1 / DPS1 / HXK1 / HXK2 / PMA1 / MET6 / SCP160 / ILV5 / FAS1 / ADK1 / ADE5,7 / ADE3 / ATP1 / URA2 / GDH1 / HTS1 / LEU1 / SEC53 / SES1 / ILV2 / RPC40 / VAS1 / ERG20 / ARO1 / ILS1 / MIS1 / RNR2 / SBP1 / SSA1 / SAM1 / RPA190 / ZWF1 / SSB1 / RNA1 / PGI1 / GLN4 / URA5 / HOM2 / FBA1…
	GO:0009126	purine nucleoside monophosphate metabolic process	37	0.149798	0.067659	1.3994e-09	6.72317	ADH1 / TDH2 / TDH1 / CDC19 / PGK1 / ATP2 / ENO1 / ENO2 / TPI1 / GPM1 / HXK1 / HXK2 / PMA1 / PDC1 / ADK1 / ADE5,7 / ATP1 / PGI1 / FBA1 / GUK1 / VMA2 / PFK1 / PFK2 / VMA1 / ADE2 / ADE1 / PDB1 / VPH1 / ADE17 / GUA1 / IMD2 / ADE6 / ADO1 / IMD4 / IMD3 / ADE12 / ADE13
	GO:0009167	purine ribonucleoside monophosphate metabolic process	37	0.149798	0.067659	1.3994e-09	6.72317	ADH1 / TDH2 / TDH1 / CDC19 / PGK1 / ATP2 / ENO1 / ENO2 / TPI1 / GPM1 / HXK1 / HXK2 / PMA1 / PDC1 / ADK1 / ADE5,7 / ATP1 / PGI1 / FBA1 / GUK1 / VMA2 / PFK1 / PFK2 / VMA1 / ADE2 / ADE1 / PDB1 / VPH1 / ADE17 / GUA1 / IMD2 / ADE6 / ADO1 / IMD4 / IMD3 / ADE12 / ADE13
	GO:0009260	ribonucleotide biosynthetic process	40	0.161943	0.0757781	1.6008e-09	6.72317	TDH2 / TDH1 / CDC19 / PGK1 / ATP2 / ENO1 / ENO2 / TPI1 / GPM1 / HXK1 / HXK2 / PMA1 / ADK1 / ADE5,7 / ATP1 / URA2 / PGI1 / URA5 / FBA1 / GUK1 / PFK1 / PFK2 / FUR1 / ADE2 / ADE1 / URA1 / URA7 / PDB1 / VPH1 / ADE17 / GUA1 / IMD2 / ADE6 / ADO1 / IMD4 / IMD3 / ACS2 / ADE12 / ACC1 / ADE13
	GO:0043436	oxoacid metabolic process	92	0.37247	0.242219	7.57895e-09	6.28589	ADH1 / TDH2 / TDH1 / HIS1 / CDC19 / PGK1 / HIS4 / ENO1 / ENO2 / TRP5 / TPI1 / GPM1 / MES1 / CPA2 / THS1 / DPS1 / HXK1 / HXK2 / MET6 / ILV5 / PDC1 / FAS1 / ADE3 / URA2 / GDH1 / HTS1 / LEU1 / SES1 / ILV2 / VAS1 / ARO1 / ILS1 / MIS1 / SAM1 / PGI1 / GLN4 / HOM2 / FBA1 / GFA1 / KRS1 / FRS1 / FRS2 / THR4 / PFK1 / PFK2 / THR1 / FAS2 / SAM2 / ACO1 / FPR1 / AAT2 / CDC60 / IDH2 / URA7 / ARO2 / HOM6 / CYS3 …
	GO:0019752	carboxylic acid metabolic process	91	0.368421	0.239513	9.49314e-09	6.28589	ADH1 / TDH2 / TDH1 / HIS1 / CDC19 / PGK1 / HIS4 / ENO1 / ENO2 / TRP5 / TPI1 / GPM1 / MES1 / CPA2 / THS1 / DPS1 / HXK1 / HXK2 / MET6 / ILV5 / PDC1 / FAS1 / ADE3 / URA2 / GDH1 / HTS1 / LEU1 / SES1 / ILV2 / VAS1 / ARO1 / ILS1 / MIS1 / SAM1 / PGI1 / GLN4 / HOM2 / FBA1 / GFA1 / KRS1 / FRS1 / FRS2 / THR4 / PFK1 / PFK2 / THR1 / FAS2 / SAM2 / ACO1 / FPR1 / AAT2 / CDC60 / IDH2 / URA7 / ARO2 / HOM6 / CYS3 …
	GO:0006418	tRNA aminoacylation for protein translation	18	0.0728745	0.0257104	2.35108e-08	6.07912	MES1 / THS1 / DPS1 / HTS1 / SES1 / VAS1 / ILS1 / GLN4 / KRS1 / FRS1 / FRS2 / CDC60 / TYS1 / GRS1 / DED81 / ALA1 / GUS1 / ARC1
	GO:0019693	ribose phosphate metabolic process	50	0.202429	0.109608	2.89697e-08	6.02983	ADH1 / TDH2 / TDH1 / CDC19 / PGK1 / ATP2 / ENO1 / ENO2 / TPI1 / GPM1 / HXK1 / HXK2 / PMA1 / PDC1 / ADK1 / ADE5,7 / ATP1 / URA2 / ZWF1 / PGI1 / URA5 / FBA1 / TAL1 / GUK1 / VMA2 / PFK1 / PFK2 / VMA1 / FUR1 / ADE2 / TKL1 / ADE1 / URA1 / URA7 / MVD1 / PDB1 / VPH1 / ADE17 / GUA1 / IMD2 / GND1 / SOL3 / ADE6 / ADO1 / IMD4 / IMD3 / ACS2 / ADE12 / ACC1 / ADE13
	GO:1901135	carbohydrate derivative metabolic process	65	0.263158	0.163735	3.7561e-07	5.1061	ADH1 / TDH2 / TDH1 / CDC19 / PGK1 / ATP2 / ENO1 / ENO2 / TPI1 / GPM1 / HXK1 / HXK2 / PMA1 / PDC1 / ADK1 / ADE5,7 / ATP1 / URA2 / SEC53 / RNR2 / ZWF1 / PGI1 / URA5 / FBA1 / GFA1 / TAL1 / GUK1 / VMA2 / PFK1 / PFK2 / VMA1 / PDI1 / FUR1 / ADE2 / RNR1 / TRX2 / TKL1 / ADE1 / URA1 / URA7 / BMH1 / PMI40 / MVD1 / PDB1 / VPH1 / UGP1 / BMH2 / ADE17 / GUA1 / IMD2 / GND1 / SOL3 / ADE6 / SAH1 / PSA1 / ADO1 / R…
	GO:0072521	purine-containing compound metabolic process	44	0.178138	0.0987821	6.53502e-07	4.89041	ADH1 / TDH2 / TDH1 / CDC19 / PGK1 / ATP2 / ENO1 / ENO2 / TPI1 / GPM1 / HXK1 / HXK2 / PMA1 / PDC1 / ADK1 / ADE5,7 / ADE3 / ATP1 / MIS1 / PGI1 / FBA1 / GUK1 / VMA2 / PFK1 / PFK2 / VMA1 / ADE2 / ADE1 / MVD1 / PDB1 / VPH1 / ADE17 / GUA1 / IMD2 / ADE6 / SAH1 / ADO1 / IMD4 / IMD3 / ACS2 / ADE12 / ACC1 / ADE13 / SAM4
	GO:0006457	protein folding	26	0.105263	0.052774	1.33342e-05	3.81678	SSC1 / SSA1 / SSA2 / SSB1 / CPR1 / HSC82 / STI1 / PDI1 / HSP60 / FPR1 / SIS1 / YDJ1 / HSP104 / ZUO1 / SSE1 / TSA1 / SSZ1 / EGD2 / CCT2 / CCT3 / CCT4 / CCT6 / SSB2 / CCT7 / CCT8 / EGD1
	GO:0017144	drug metabolic process	50	0.202429	0.127199	1.84731e-05	3.689	ADH1 / TDH2 / TDH1 / CDC19 / PGK1 / ATP2 / ENO1 / ENO2 / TPI1 / GPM1 / HXK1 / HXK2 / PMA1 / PDC1 / ATP1 / MIS1 / SAM1 / PGI1 / FBA1 / GFA1 / VMA2 / PFK1 / PFK2 / VMA1 / SAM2 / ACO1 / IDH2 / BMH1 / CYS3 / PRO3 / PDB1 / VPH1 / CYS4 / BMH2 / SHM2 / SHM1 / GLY1 / BAT1 / YHB1 / SAH1 / ADO1 / ASN2 / ACS2 / ARO8 / ALD6 / PRO2 / ADE12 / ADE13 / SAM4 / GLT1
	GO:1901360	organic cyclic compound metabolic process	140	0.566802	0.477673	0.000388661	2.44627	MBF1 / ADH1 / TDH2 / TDH1 / SOD1 / HIS1 / CDC19 / PGK1 / HIS4 / ATP2 / ENO1 / ENO2 / TRP5 / TPI1 / GPM1 / MES1 / YPT1 / CPA2 / THS1 / DPS1 / HXK1 / HXK2 / PMA1 / SCP160 / PDC1 / ADK1 / ADE5,7 / ADE3 / ATP1 / URA2 / HTS1 / SEC53 / SES1 / RPC40 / VAS1 / ERG20 / ARO1 / ILS1 / MIS1 / RNR2 / SSC1 / RPA190 / ZWF1 / SSB1 / RNA1 / PGI1 / GLN4 / URA5 / FBA1 / GFA1 / TAL1 / HSC82 / KRS1 / GUK1 / FRS1 / FRS…
	GO:0006733	oxidoreduction coenzyme metabolic process	24	0.097166	0.0568336	0.000984063	2.10068	ADH1 / TDH2 / TDH1 / CDC19 / PGK1 / ENO1 / ENO2 / TPI1 / GPM1 / HXK1 / HXK2 / PDC1 / ZWF1 / PGI1 / FBA1 / TAL1 / PFK1 / PFK2 / TKL1 / PDB1 / GND1 / SOL3 / ALD6 / GPD1

## Sheet: Sheet 6 - Yeast strains
Name	Genotype	Source1
BY4741	MATa his3-∆1 leu2∆0 met15∆0 ura3∆0	Euro
GP6001	MATa leu2∆0 met15∆0 ura3∆0	JC
GP7542	MATa his3-∆1 leu2∆0 met15∆0 ura3∆0 AAT2-TAP::HIS3	TAP
GP7302	MATa his3-∆1 leu2∆0 met15∆0 ura3∆0 slf1∆::KanMX4	CK
GP7733	MATa his3-∆1 leu2∆0 met15∆0 ura3∆0 clu1∆::KanMX4	Euro
GP7735	MATa his3-∆1 leu2∆0 met15∆0 ura3∆0 rbg1∆::KanMX4	Euro
GP7797	MATa his3-∆1 leu2∆0 met15∆0 ura3∆0 aat2∆::KanMX4	Euro
GP7798	MATa his3-∆1 leu2∆0 met15∆0 ura3∆0 asp1∆::KanMX4	Euro
GP7799	MATa his3-∆1 leu2∆0 met15∆0 ura3∆0 bfr1∆::KanMX4	Euro
GP7800	MATa his3-∆1 leu2∆0 met15∆0 ura3∆0 bmh1∆::KanMX4	Euro
GP7801	MATa his3-∆1 leu2∆0 met15∆0 ura3∆0 imd4∆::KanMX4	Euro
GP7802	MATa his3-∆1 leu2∆0 met15∆0 ura3∆0 mbf1∆::KanMX4	Euro
GP7803	MATa his3-∆1 leu2∆0 met15∆0 ura3∆0 mis1∆::KanMX4	Euro
GP7804	MATa his3-∆1 leu2∆0 met15∆0 ura3∆0 ola1∆::KanMX4	Euro
GP7805	MATa his3-∆1 leu2∆0 met15∆0 ura3∆0 scp160∆::KanMX4	Euro
GP7871	MATa his3-∆1 leu2∆0 met15∆0 ura3∆0 [pAV1153]	TS
GP7872	MATa his3-∆1 leu2∆0 met15∆0 ura3∆0 aat2∆::KanMX4 [pAV1153]	TS
GP7873	MATa his3-∆1 leu2∆0 met15∆0 ura3∆0 bmh1∆::KanMX4 [pAV1153]	TS
GP7874	MATa his3-∆1 leu2∆0 met15∆0 ura3∆0 clu1∆::KanMX4 [pAV1153]	TS
GP7875	MATa his3-∆1 leu2∆0 met15∆0 ura3∆0 rbg1∆::KanMX4 [pAV1153]	TS
GP7876	MATa his3-∆1 leu2∆0 met15∆0 ura3∆0 slf1∆::KanMX4 [pAV1153]	TS
GP7877	MATa his3-∆1 leu2∆0 met15∆0 ura3∆0 [pAV2561]	TS
GP7878	MATa his3-∆1 leu2∆0 met15∆0 ura3∆0 aat2∆::KanMX4 [pAV2561]	TS
GP7879	MATa his3-∆1 leu2∆0 met15∆0 ura3∆0 bmh1∆::KanMX4 [pAV2561]	TS
GP7880	MATa his3-∆1 leu2∆0 met15∆0 ura3∆0 clu1∆::KanMX4 [pAV2561]	TS
GP7881	MATa his3-∆1 leu2∆0 met15∆0 ura3∆0 rbg1∆::KanMX4 [pAV2561]	TS
GP7882	MATa his3-∆1 leu2∆0 met15∆0 ura3∆0 slf1∆::KanMX4 [pAV2561]	TS
GP8055	MATa his3-∆1 leu2∆0 met15∆0 ura3∆0 [pAV1158]	TS
GP8056	MATa his3-∆1 leu2∆0 met15∆0 ura3∆0 [pAV1159]	TS
GP8057	MATa his3-∆1 leu2∆0 met15∆0 ura3∆0 [pAV2038]	TS
GP8059	MATa his3-∆1 leu2∆0 met15∆0 ura3∆0 aat2∆::KanMX4 [pAV1158]	TS
GP8060	MATa his3-∆1 leu2∆0 met15∆0 ura3∆0 aat2∆::KanMX4 [pAV1159]	TS
GP8061	MATa his3-∆1 leu2∆0 met15∆0 ura3∆0 aat2∆::KanMX4 [pAV2038]	TS
GP8084	MATa his3-∆1 leu2∆0 met15∆0 ura3∆0 [pAV1153]	TS
GP8085	MATa his3-∆1 leu2∆0 met15∆0 ura3∆0 aat2∆::KanMX4 [pAV1153]	TS
GP8109	MATa his3-∆1 leu2∆0 met15∆0 ura3∆0 [pAV2037]	TS
GP8111	MATa his3-∆1 leu2∆0 met15∆0 ura3∆0 aat2∆::KanMX4 [pAV2037]	TS
GP8112	MATa his3-Δ1 leu2Δ0 met15Δ0 ura3Δ0 aat2Δ	TS
GP8113	MATa leu2Δ0 met15Δ0 ura3Δ0 aat2Δ	TS
GP8115	MATa his3-∆1 leu2∆0 met15∆0 ura3∆0 AAT2(sm)-TAP::HIS3	TS
GP8116	MATa his3-∆1 leu2∆0 met15∆0 ura3∆0 AAT2(sm)-K255E-TAP::HIS3	TS
GP8117	MATa his3-∆1 leu2∆0 met15∆0 ura3∆0 AAT2(sm)-R387E-TAP::HIS3	TS
1 Source references:
CK {Kershaw, 2015 #27}
Euro – Euroscarf {Giaever, 2002 #72}
JC {Costello, 2015 #6}
TAP – TAP tag strain collection {Ghaemmaghami, 2003 #67}
TS – strains constructed for this study

## Sheet: Sheet 7 - Plasmids
Name	Genotype	Description	Source1
p180/pAV1153	GCN4-lacZ URA3 CEN4	GCN4 uORFs (WT) fused to β-galactosidase (lacZ)	AH
p226/pAV1158	xxx4-GCN4-lacZ URA3 CEN4	uORF4 only	AH
p227/pAV1159	xxxx-GCN4-lacZ URA3 CEN4	No uORFs	AH
pM199/pAV2037	1xxx-GCN4-lacZ URA3 CEN4	uORF1 only	AH
pM226/pAV2038	1(ext)xxx-GCN4-lacZ URA3 CEN4	uORF1 extended across start codon	AH
pCEP12/pAV2561	YRE-lacZ URA3 CEN4	Yeast response element (YRE) fused to β-galactosidase (lacZ)	CG
bRA90/pAV2676	PGK1-Cas9 LEU2 CEN	Cas9 expressed under PGK1 promoter	Add
pAV2711	PGK1-Cas9 LEU2 AAT2-gRNA	Cas9 expressed under PGK1 promoter & AAT2 guide RNA	TS
1 Source references:
Add – Addgene {Anand, 2017 #75}
AH – Prof Alan Hinnebusch {Grant, 1994 #81}
CG – Prof Chris Grant {Gomez-Pastor, 2013 #76}
TS – constructed for this study

## Sheet: Sheet 8 - Oligonucleotides
Name	Sequence (5’ to 3’)
Deletion strain verification primers1
KanMX_V_F	CAGTCTTGACGTGCGCAGCTCAG
KanMX_V_R	CTGAGCTGCGCACGTCAAGACTG
AAT2_verif_F	ATTTACCTTGTCGCCTTGCACG
AAT2_verif_R	GGAGTTGTGTGGTATGGTGAAATGG
ASP1_verif_F	TGAAGACAGTGGAGGATAACAGC
ASP1_verif_R	AAAGCCATGTGCAGGTGAAACG
BFR1_verif_F	AATTGCTTACCCGCACTGTGG
BFR1_verif_R	GAACATGAGGAAAGAATTGGCTGG
BMH1_verif_F	GAAGCTACTTTATTCCGGCCTGG
BMH1_verif_R	TGATGGTTGGCGTTTGAATGAAGC
CLU1_verif_F	ATGGGATAGCTGAGAAACTTGTGC
CLU1_verif_R	ACACTGAGTGGAGTGCTAGAAGG
IMD4_verif_F	CCTCCTTTGTACCTCTTCTCTTTCC
IMD4_verif_R	AGATGACGAACATCGAAGGAAAGC
MBF1_verif_F	ATTACCCGACCAAGAGAACCACG
MBF1_verif_R	AAGAAATCAGCAGCGGCAAGC
MIS1_verif_F	AACTTTACGCCATCCAACCAATCG
MIS1_verif_R	TGGCTAAGTACCGTGATGCTGG
OLA1_verif_F	CACTGATTGCTTCCTCCGAATGC
OLA1_verif_R	AAAGGAAGAACGGGAGCGTAGG
RBG1_verif_F	TGCGCTGCTTTCTGGATTTGG
RBG1_verif_R	AGATGCTCTATACTCAAACGGTGG
SCP160_verif_F	CCCATCAGGTATTCATCCACTCC
SCP160_verif_R	TGACTACTGCGGAAACTTCGTCG
CRISPR/Cas9 primers
AAT2_gRNA_F	GCCTACGGCGCTAAGATTGTGATCA
AAT2_gRNA_R	ACAATCTTAGCGCCGTAGGCGTTTT
AAT2_repair_amp_F	GCGTCTAGGTGTGGAGAAGC
AAT2_repair_amp_R	GCGCACCACTTCATCAATGG
AAT2_seq_F	TACCAAGGGTTTGCCACTGG
CRISPR/Cas9 repair constructs
AAT2 SM2	GCGTCTAGGTGTGGAGAAGCTTTCAACGGTCTCTCCCGTCTTTGTCTGTCAGTCCTTTGCCAAGAACGCCGGTATGTACGGTGAGCGTGTAGGTTGTTTCCATCTAGCACTTACAAAACAAGCTCAAAACAAAACTATAAAGCCTGCTGTTACATCTCAATTGGCCAAAATCATTCGTAGTGAAGTGTCCAACCCACCCGCATATGGAGCAAAGATTGTCGCTAAACTGTTGGAAACGCCAGAATTAACGGAACAGTGGCACAAGGATATGGTTACCATGTCCTCCAGAATTACGAAAATGAGGCACGCATTAAGAGACCATTTAGTCAAGTTGGGCACTCCTGGCAACTGGGATCATATAGTAAATCAATGCGGGATGTTCTCCTTTACAGGATTGAC…
AAT2 K255E2	GCGTCTAGGTGTGGAGAAGCTTTCAACGGTCTCTCCCGTCTTTGTCTGTCAGTCCTTTGCCGAAAACGCCGGTATGTACGGTGAGCGTGTAGGTTGTTTCCATCTAGCACTTACAAAACAAGCTCAAAACAAAACTATAAAGCCTGCTGTTACATCTCAATTGGCCAAAATCATTCGTAGTGAAGTGTCCAACCCACCCGCATATGGAGCAAAGATTGTCGCTAAACTGTTGGAAACGCCAGAATTAACGGAACAGTGGCACAAGGATATGGTTACCATGTCCTCCAGAATTACGAAAATGAGGCACGCATTAAGAGACCATTTAGTCAAGTTGGGCACTCCTGGCAACTGGGATCATATAGTAAATCAATGCGGGATGTTCTCCTTTACAGGATTGAC…
AAT2 R387E2	GCGTCTAGGTGTGGAGAAGCTTTCAACGGTCTCTCCCGTCTTTGTCTGTCAGTCCTTTGCCAAGAACGCCGGTATGTACGGTGAGCGTGTAGGTTGTTTCCATCTAGCACTTACAAAACAAGCTCAAAACAAAACTATAAAGCCTGCTGTTACATCTCAATTGGCCAAAATCATTCGTAGTGAAGTGTCCAACCCACCCGCATATGGAGCAAAGATTGTCGCTAAACTGTTGGAAACGCCAGAATTAACGGAACAGTGGCACAAGGATATGGTTACCATGTCCTCCAGAATTACGAAAATGAGGCACGCATTAAGAGACCATTTAGTCAAGTTGGGCACTCCTGGCAACTGGGATCATATAGTAAATCAATGCGGGATGTTCTCCTTTACAGGATTGAC…
1 Deletion strain verification primers were used to confirm that the strains from the Euroscarf deletion collection {Giaever, 2002 #72} were correct.
2 For the CRISPR/Cas9 repair constructs, the PAM and gRNA sequences are underlined and mutated bases are in bold.
